# Supplementary material for: MAG2 and MAL Regulate Vesicle Trafficking and Auxin Homeostasis With Functional Redundancy
Source: Frontiers journal article supplement (doi:10.3389/fpls.2022.849532), 2022-03-16
Supplement: Data_Sheet_1.PDF [file Data_Sheet_1.PDF]

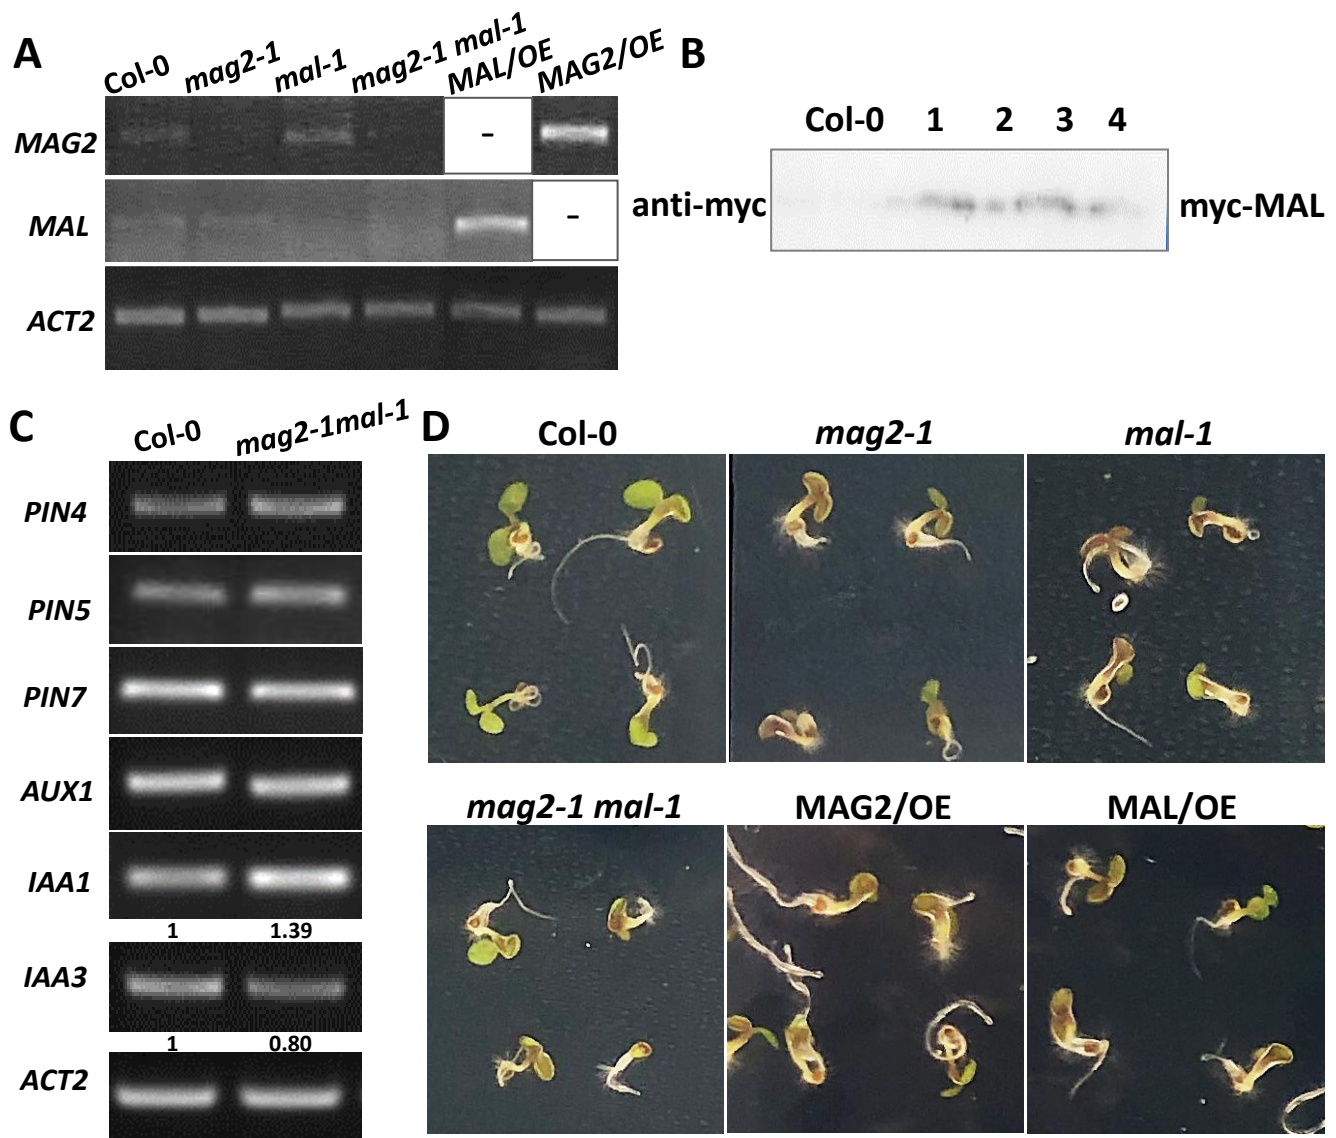

**Supplementary FIGURE 1 | MAG2 and MAL affect plant development and stress response.** (A) RT-PCR determination of *MAL* and *MAG2* expression levels in the mutants and overexpression lines. - : not performed. (B) Immunoblot detection of myc-MAL in *MAL*/OE lines. (C) RT-PCR detection of expression of auxin-related genes. Statistics of relative band concentration (presents expression level) is shown in number below the bands (*IAs*/ACT2, measured by ImageJ). (D) Six-day-old seedlings germinated on 1/2 MS medium accumulated higher anthocyanin.
