# Supplementary material for: MAG2 and MAL Regulate Vesicle Trafficking and Auxin Homeostasis With Functional Redundancy
Source: Front Plant Sci. 2022 Mar 16;13:849532. doi: 10.3389/fpls.2022.849532 (PMC8966843; doi:10.3389/fpls.2022.849532)
Supplement: Supplementary Table 1 — Proteomic analysis of microsomal fraction of the mag2-1 mal double mutant. [file Table_1.xlsx]

## Sheet: total proteinGroups
Protein IDs	Majority protein IDs	Peptide counts (all)	Peptide counts (razor+unique)	Peptide counts (unique)	Fasta headers	Number of proteins	Peptides	Razor + unique peptides	Unique peptides	Peptides 20160415_mutant_test_1	Peptides 20160415_mutant_test_2	Peptides 20160415_WT_test_1	Peptides 20160415_WT_test_2	Razor + unique peptides 20160415_mutant_test_1	Razor + unique peptides 20160415_mutant_test_2	Razor + unique peptides 20160415_WT_test_1	Razor + unique peptides 20160415_WT_test_2	Unique peptides 20160415_mutant_test_1	Unique peptides 20160415_mutant_test_2	Unique peptides 20160415_WT_test_1	Unique peptides 20160415_WT_test_2	Sequence coverage [%]	Unique + razor sequence coverage [%]	Unique sequence coverage [%]	Mol. weight [kDa]	Sequence length	Sequence lengths	Experiment 20160415_mutant_test_1	Experiment 20160415_mutant_test_2	Experiment 20160415_WT_test_1	Experiment 20160415_WT_test_2	PEP	Sequence coverage 20160415_mutant_test_1 [%]	Sequence coverage 20160415_mutant_test_2 [%]	Sequence coverage 20160415_WT_test_1 [%]	Sequence coverage 20160415_WT_test_2 [%]	Intensity	Intensity 20160415_mutant_test_1	Intensity 20160415_mutant_test_2	Intensity 20160415_WT_test_1	Intensity 20160415_WT_test_2	LFQ intensity 20160415_mutant_test_1	LFQ intensity 20160415_mutant_test_2	LFQ intensity 20160415_WT_test_1	LFQ intensity 20160415_WT_test_2	MS/MS Count 20160415_mutant_test_1	MS/MS Count 20160415_mutant_test_2	MS/MS Count 20160415_WT_test_1	MS/MS Count 20160415_WT_test_2
>AT1G01090.1 | Symbols: PDH-E1 ALPHA | pyruvate dehydrogenase E1 alpha | chr1:47705-49166 REVERSE LENGTH=428	>AT1G01090.1 | Symbols: PDH-E1 ALPHA | pyruvate dehydrogenase E1 alpha | chr1:47705-49166 REVERSE LENGTH=428	17	17	17	>AT1G01090.1 | Symbols: PDH-E1 ALPHA | pyruvate dehydrogenase E1 alpha | chr1:47705-49166 REVERSE LENGTH=428	1	17	17	17	11	12	15	15	11	12	15	15	11	12	15	15	41.8	41.8	41.8	47.173	428	428	16	16	21	22	3.9962e-222	30.1	38.8	39	40.2	8269100000	2194100000	1647200000	1978500000	2449200000	2312900000	1544000000	2552600000	2285100000	13	7	18	15
>AT1G01100.4 | Symbols: | 60S acidic ribosomal protein family | chr1:50284-50954 REVERSE LENGTH=112;>AT1G01100.2 | Symbols: | 60S acidic ribosomal protein family | chr1:50284-50954 REVERSE LENGTH=112;>AT1G01100.1 | Symbols: | 60S acidic ribosomal protein family | chr1:50284-50954 REVERSE LENGTH=112;>AT1G01100.3 | Symbols: | 60S acidic ribosomal protein family | chr1:50284-50954 REVERSE LENGTH=96	>AT1G01100.4 | Symbols: | 60S acidic ribosomal protein family | chr1:50284-50954 REVERSE LENGTH=112;>AT1G01100.2 | Symbols: | 60S acidic ribosomal protein family | chr1:50284-50954 REVERSE LENGTH=112;>AT1G01100.1 | Symbols: | 60S acidic ribosomal protein family | chr1:50284-50954 REVERSE LENGTH=112;>AT1G01100.3 | Symbols: | 60S acidic ribosomal protein family | chr1:50284-50954 REVERSE LENGTH=96	3;3;3;2	3;3;3;2	2;2;2;1	>AT1G01100.4 | Symbols: | 60S acidic ribosomal protein family | chr1:50284-50954 REVERSE LENGTH=112;>AT1G01100.2 | Symbols: | 60S acidic ribosomal protein family | chr1:50284-50954 REVERSE LENGTH=112;>AT1G01100.1 | Symbols: | 60S acidic ribosomal protei	4	3	3	2	1	2	3	2	1	2	3	2	0	1	2	1	72.3	72.3	49.1	11.162	112	112;112;112;96	2	4	4	4	2.2393e-29	23.2	37.5	72.3	37.5	1153700000	152020000	217360000	458590000	325740000	210990000	175960000	252550000	336490000	3	5	3	5
>AT1G01120.1 | Symbols: KCS1 | 3-ketoacyl-CoA synthase 1 | chr1:57392-58978 REVERSE LENGTH=528	>AT1G01120.1 | Symbols: KCS1 | 3-ketoacyl-CoA synthase 1 | chr1:57392-58978 REVERSE LENGTH=528	2	2	2	>AT1G01120.1 | Symbols: KCS1 | 3-ketoacyl-CoA synthase 1 | chr1:57392-58978 REVERSE LENGTH=528	1	2	2	2	2	1	2	0	2	1	2	0	2	1	2	0	5.3	5.3	5.3	59.276	528	528	2	1	2		2.1509e-05	5.3	2.1	5.3	0	133560000	51686000	42806000	39067000	0	0	0	42877000	0	1	1	0	0
>AT1G01170.2 | Symbols: | Protein of unknown function (DUF1138) | chr1:74105-74443 REVERSE LENGTH=83;>AT1G01170.1 | Symbols: | Protein of unknown function (DUF1138) | chr1:74105-74443 REVERSE LENGTH=83	>AT1G01170.2 | Symbols: | Protein of unknown function (DUF1138) | chr1:74105-74443 REVERSE LENGTH=83;>AT1G01170.1 | Symbols: | Protein of unknown function (DUF1138) | chr1:74105-74443 REVERSE LENGTH=83	2;2	2;2	2;2	>AT1G01170.2 | Symbols: | Protein of unknown function (DUF1138) | chr1:74105-74443 REVERSE LENGTH=83;>AT1G01170.1 | Symbols: | Protein of unknown function (DUF1138) | chr1:74105-74443 REVERSE LENGTH=83	2	2	2	2	2	2	2	2	2	2	2	2	2	2	2	2	31.3	31.3	31.3	9.0623	83	83;83	2	2	2	2	8.4536e-14	31.3	31.3	31.3	31.3	551850000	175280000	142570000	126020000	107980000	190250000	161580000	128510000	130340000	2	1	2	1
>AT1G01220.1 | Symbols: FKGP, AtFKGP | L-fucokinase/GDP-L-fucose pyrophosphorylase | chr1:91750-95552 FORWARD LENGTH=1055	>AT1G01220.1 | Symbols: FKGP, AtFKGP | L-fucokinase/GDP-L-fucose pyrophosphorylase | chr1:91750-95552 FORWARD LENGTH=1055	5	5	5	>AT1G01220.1 | Symbols: FKGP, AtFKGP | L-fucokinase/GDP-L-fucose pyrophosphorylase | chr1:91750-95552 FORWARD LENGTH=1055	1	5	5	5	4	3	4	3	4	3	4	3	4	3	4	3	7	7	7	116.35	1055	1055	4	3	4	3	2.5603e-09	6.1	3.5	6.2	5.2	274110000	92247000	47308000	99414000	35140000	70979000	81333000	97060000	49699000	3	1	2	1
>AT1G01300.1 | Symbols: | Eukaryotic aspartyl protease family protein | chr1:117065-118522 FORWARD LENGTH=485	>AT1G01300.1 | Symbols: | Eukaryotic aspartyl protease family protein | chr1:117065-118522 FORWARD LENGTH=485	7	7	6	>AT1G01300.1 | Symbols: | Eukaryotic aspartyl protease family protein | chr1:117065-118522 FORWARD LENGTH=485	1	7	7	6	3	3	5	5	3	3	5	5	3	3	4	4	16.3	16.3	14.6	52.175	485	485	3	3	5	5	6.9452e-52	8.5	8.5	11.8	12.6	778120000	147570000	274380000	174760000	181400000	150470000	301860000	203750000	221880000	2	2	2	5
>AT1G01370.2 | Symbols: HTR12, CENH3 | Histone superfamily protein | chr1:143773-145400 FORWARD LENGTH=178;>AT1G01370.1 | Symbols: HTR12, CENH3 | Histone superfamily protein | chr1:143773-145400 FORWARD LENGTH=178	>AT1G01370.2 | Symbols: HTR12, CENH3 | Histone superfamily protein | chr1:143773-145400 FORWARD LENGTH=178;>AT1G01370.1 | Symbols: HTR12, CENH3 | Histone superfamily protein | chr1:143773-145400 FORWARD LENGTH=178	1;1	1;1	1;1	>AT1G01370.2 | Symbols: HTR12, CENH3 | Histone superfamily protein | chr1:143773-145400 FORWARD LENGTH=178;>AT1G01370.1 | Symbols: HTR12, CENH3 | Histone superfamily protein | chr1:143773-145400 FORWARD LENGTH=178	2	1	1	1	1	1	1	1	1	1	1	1	1	1	1	1	7.3	7.3	7.3	19.709	178	178;178	2	1	1	1	7.5171e-07	7.3	7.3	7.3	7.3	113320000	57137000	24741000	17996000	13441000	0	0	0	16885000	1	0	1	0
>AT1G01420.1 | Symbols: UGT72B3 | UDP-glucosyl transferase 72B3 | chr1:154566-156011 REVERSE LENGTH=481;>AT1G01390.1 | Symbols: | UDP-Glycosyltransferase superfamily protein | chr1:148319-149761 REVERSE LENGTH=480	>AT1G01420.1 | Symbols: UGT72B3 | UDP-glucosyl transferase 72B3 | chr1:154566-156011 REVERSE LENGTH=481	3;1	2;1	2;1	>AT1G01420.1 | Symbols: UGT72B3 | UDP-glucosyl transferase 72B3 | chr1:154566-156011 REVERSE LENGTH=481	2	3	2	2	2	2	2	2	2	2	1	1	2	2	1	1	11.2	9.1	9.1	52.784	481	481;480	2	2	1	1	2.9079e-23	9.1	9.1	7.9	5.4	107630000	36037000	51270000	6946500	13373000	35956000	58137000	0	0	2	1	0	0
>AT1G01453.1 | Symbols: | unknown protein; FUNCTIONS IN: molecular_function unknown; INVOLVED IN: biological_process unknown; LOCATED IN: cellular_component unknown; BEST Arabidopsis thaliana protein match is: unknown protein (TAIR:AT4G01110.1); Has 30201 Blast hits to 17322 proteins in 780 species: Archae - 12; Bacteria - 1396; Metazoa - 17338; Fungi - 3422; Plants - 5037; Viruses - 0; Other Euk…	>AT1G01453.1 | Symbols: | unknown protein; FUNCTIONS IN: molecular_function unknown; INVOLVED IN: biological_process unknown; LOCATED IN: cellular_component unknown; BEST Arabidopsis thaliana protein match is: unknown protein (TAIR:AT4G01110.1); Has 30201 Blast hits to 17322 proteins in 780 species: Archae - 12; Bacteria - 1396; Metazoa - 17338; Fungi - 3422; Plants - 5037; Viruses - 0; Other Euk…	1;1	1;1	1;1	>AT1G01453.1 | Symbols: | unknown protein; FUNCTIONS IN: molecular_function unknown; INVOLVED IN: biological_process unknown; LOCATED IN: cellular_component unknown; BEST Arabidopsis thaliana protein match is: unknown protein (TAIR:AT4G01110.1); Has 30201	2	1	1	1	0	0	0	1	0	0	0	1	0	0	0	1	3.7	3.7	3.7	29.659	267	267;289				1	1.38e-09	0	0	0	3.7	0	0	0	0	0	0	0	0	0	0	0	0	0
>AT1G01470.1 | Symbols: LEA14, LSR3 | Late embryogenesis abundant protein | chr1:172295-172826 REVERSE LENGTH=151	>AT1G01470.1 | Symbols: LEA14, LSR3 | Late embryogenesis abundant protein | chr1:172295-172826 REVERSE LENGTH=151	1	1	1	>AT1G01470.1 | Symbols: LEA14, LSR3 | Late embryogenesis abundant protein | chr1:172295-172826 REVERSE LENGTH=151	1	1	1	1	1	1	1	1	1	1	1	1	1	1	1	1	11.3	11.3	11.3	16.543	151	151	1	1	1	1	0.00036783	11.3	11.3	11.3	11.3	209570000	60940000	39681000	60683000	48265000	0	0	0	60633000	1	1	1	0
>AT1G01510.1 | Symbols: AN | NAD(P)-binding Rossmann-fold superfamily protein | chr1:187235-189836 FORWARD LENGTH=636	>AT1G01510.1 | Symbols: AN | NAD(P)-binding Rossmann-fold superfamily protein | chr1:187235-189836 FORWARD LENGTH=636	5	5	5	>AT1G01510.1 | Symbols: AN | NAD(P)-binding Rossmann-fold superfamily protein | chr1:187235-189836 FORWARD LENGTH=636	1	5	5	5	2	3	3	4	2	3	3	4	2	3	3	4	10.8	10.8	10.8	70.149	636	636	3	3	3	4	2.0616e-14	3.6	6.3	6	8.5	256950000	96116000	60613000	52333000	47887000	78474000	73888000	57481000	44259000	2	2	2	3
>AT1G01610.1 | Symbols: ATGPAT4, GPAT4 | glycerol-3-phosphate acyltransferase 4 | chr1:221950-224255 REVERSE LENGTH=503;>AT4G00400.1 | Symbols: GPAT8, AtGPAT8 | glycerol-3-phosphate acyltransferase 8 | chr4:174312-176734 REVERSE LENGTH=500	>AT1G01610.1 | Symbols: ATGPAT4, GPAT4 | glycerol-3-phosphate acyltransferase 4 | chr1:221950-224255 REVERSE LENGTH=503	5;2	5;2	5;2	>AT1G01610.1 | Symbols: ATGPAT4, GPAT4 | glycerol-3-phosphate acyltransferase 4 | chr1:221950-224255 REVERSE LENGTH=503	2	5	5	5	5	5	5	5	5	5	5	5	5	5	5	5	13.1	13.1	13.1	56.261	503	503;500	5	5	5	5	1.6992e-35	13.1	13.1	13.1	13.1	711140000	221840000	248270000	105520000	135520000	233610000	273810000	130390000	151220000	3	5	1	1
>AT1G01620.1 | Symbols: PIP1C, TMP-B, PIP1;3 | plasma membrane intrinsic protein 1C | chr1:225986-227176 REVERSE LENGTH=286;>AT1G01620.2 | Symbols: PIP1C, TMP-B, PIP1;3 | plasma membrane intrinsic protein 1C | chr1:225986-226960 REVERSE LENGTH=214	>AT1G01620.1 | Symbols: PIP1C, TMP-B, PIP1;3 | plasma membrane intrinsic protein 1C | chr1:225986-227176 REVERSE LENGTH=286	8;2	8;2	5;1	>AT1G01620.1 | Symbols: PIP1C, TMP-B, PIP1;3 | plasma membrane intrinsic protein 1C | chr1:225986-227176 REVERSE LENGTH=286	2	8	8	5	7	8	8	8	7	8	8	8	5	5	5	5	29.7	29.7	19.9	30.632	286	286;214	11	12	12	12	3.44e-142	26.6	29.7	29.7	29.7	56096000000	18191000000	14646000000	12749000000	10510000000	16127000000	12537000000	15830000000	16103000000	22	13	21	19
>AT1G01710.1 | Symbols: | Acyl-CoA thioesterase family protein | chr1:262950-266029 FORWARD LENGTH=427	>AT1G01710.1 | Symbols: | Acyl-CoA thioesterase family protein | chr1:262950-266029 FORWARD LENGTH=427	7	7	7	>AT1G01710.1 | Symbols: | Acyl-CoA thioesterase family protein | chr1:262950-266029 FORWARD LENGTH=427	1	7	7	7	5	5	5	6	5	5	5	6	5	5	5	6	18.7	18.7	18.7	48.155	427	427	5	5	5	6	5.2516e-22	13.6	13.6	14.3	16.4	829640000	282750000	207330000	189430000	150130000	305420000	273140000	177050000	158410000	3	2	2	6
>AT1G01800.1 | Symbols: | NAD(P)-binding Rossmann-fold superfamily protein | chr1:293396-294888 FORWARD LENGTH=295;>AT1G01800.2 | Symbols: | NAD(P)-binding Rossmann-fold superfamily protein | chr1:293595-294888 FORWARD LENGTH=260	>AT1G01800.1 | Symbols: | NAD(P)-binding Rossmann-fold superfamily protein | chr1:293396-294888 FORWARD LENGTH=295;>AT1G01800.2 | Symbols: | NAD(P)-binding Rossmann-fold superfamily protein | chr1:293595-294888 FORWARD LENGTH=260	8;7	8;7	8;7	>AT1G01800.1 | Symbols: | NAD(P)-binding Rossmann-fold superfamily protein | chr1:293396-294888 FORWARD LENGTH=295;>AT1G01800.2 | Symbols: | NAD(P)-binding Rossmann-fold superfamily protein | chr1:293595-294888 FORWARD LENGTH=260	2	8	8	8	6	4	6	6	6	4	6	6	6	4	6	6	40.7	40.7	40.7	31.66	295	295;260	6	4	6	6	1.0864e-40	31.9	23.1	31.9	31.9	3998000000	1537600000	1339800000	575430000	545250000	1125600000	1170300000	1008900000	1066400000	4	2	4	4
>AT1G01820.1 | Symbols: PEX11C | peroxin 11c | chr1:296213-297723 REVERSE LENGTH=235	>AT1G01820.1 | Symbols: PEX11C | peroxin 11c | chr1:296213-297723 REVERSE LENGTH=235	3	2	2	>AT1G01820.1 | Symbols: PEX11C | peroxin 11c | chr1:296213-297723 REVERSE LENGTH=235	1	3	2	2	3	3	3	3	2	2	2	2	2	2	2	2	17	12.3	12.3	25.912	235	235	2	2	2	2	1.9634e-13	17	17	17	17	1094800000	280210000	271610000	299400000	243580000	283470000	300600000	331280000	307020000	2	2	2	1
>AT1G01910.4 | Symbols: | P-loop containing nucleoside triphosphate hydrolases superfamily protein | chr1:313595-315831 REVERSE LENGTH=353;>AT1G01910.2 | Symbols: | P-loop containing nucleoside triphosphate hydrolases superfamily protein | chr1:313595-315831 REVERSE LENGTH=353;>AT1G01910.1 | Symbols: | P-loop containing nucleoside triphosphate hydrolases superfamily protein | chr1:313595-315831 R…	>AT1G01910.4 | Symbols: | P-loop containing nucleoside triphosphate hydrolases superfamily protein | chr1:313595-315831 REVERSE LENGTH=353;>AT1G01910.2 | Symbols: | P-loop containing nucleoside triphosphate hydrolases superfamily protein | chr1:313595-315831 REVERSE LENGTH=353;>AT1G01910.1 | Symbols: | P-loop containing nucleoside triphosphate hydrolases superfamily protein | chr1:313595-315831 R…	7;7;7;5;5	7;7;7;5;5	7;7;7;5;5	>AT1G01910.4 | Symbols: | P-loop containing nucleoside triphosphate hydrolases superfamily protein | chr1:313595-315831 REVERSE LENGTH=353;>AT1G01910.2 | Symbols: | P-loop containing nucleoside triphosphate hydrolases superfamily protein | chr1:313595-31	5	7	7	7	5	4	5	6	5	4	5	6	5	4	5	6	30	30	30	39.67	353	353;353;353;249;303	5	5	5	6	1.3856e-39	20.1	17	21.8	25.5	4191700000	1621500000	979730000	793680000	796780000	1652500000	1148100000	897640000	904660000	7	7	5	6
>AT1G01960.1 | Symbols: EDA10 | SEC7-like guanine nucleotide exchange family protein | chr1:330830-337582 REVERSE LENGTH=1750	>AT1G01960.1 | Symbols: EDA10 | SEC7-like guanine nucleotide exchange family protein | chr1:330830-337582 REVERSE LENGTH=1750	21	21	15	>AT1G01960.1 | Symbols: EDA10 | SEC7-like guanine nucleotide exchange family protein | chr1:330830-337582 REVERSE LENGTH=1750	1	21	21	15	15	15	16	13	15	15	16	13	11	12	12	11	17.4	17.4	14.1	194.94	1750	1750	15	15	16	13	4.0339e-164	13	13.4	14.2	11.7	3185800000	965460000	947620000	733700000	539020000	978030000	1007400000	785710000	749780000	10	10	8	8
>AT1G01980.1 | Symbols: | FAD-binding Berberine family protein | chr1:340374-341999 REVERSE LENGTH=541	>AT1G01980.1 | Symbols: | FAD-binding Berberine family protein | chr1:340374-341999 REVERSE LENGTH=541	2	1	1	>AT1G01980.1 | Symbols: | FAD-binding Berberine family protein | chr1:340374-341999 REVERSE LENGTH=541	1	2	1	1	1	1	1	2	1	1	1	1	1	1	1	1	3.5	2	2	60.102	541	541	1	1	1	1	0.00020342	2	2	2	3.5	319600000	72791000	64147000	95405000	87262000	0	0	0	109620000	0	0	1	1
>AT1G02080.2 | Symbols: | transcription regulators | chr1:373694-386682 FORWARD LENGTH=2377;>AT1G02080.1 | Symbols: | transcription regulators | chr1:373335-386682 FORWARD LENGTH=2431	>AT1G02080.2 | Symbols: | transcription regulators | chr1:373694-386682 FORWARD LENGTH=2377;>AT1G02080.1 | Symbols: | transcription regulators | chr1:373335-386682 FORWARD LENGTH=2431	16;16	16;16	16;16	>AT1G02080.2 | Symbols: | transcription regulators | chr1:373694-386682 FORWARD LENGTH=2377;>AT1G02080.1 | Symbols: | transcription regulators | chr1:373335-386682 FORWARD LENGTH=2431	2	16	16	16	9	10	14	11	9	10	14	11	9	10	14	11	9.8	9.8	9.8	263.76	2377	2377;2431	11	13	17	15	1.6437e-71	5.4	5.8	8.3	6.8	2194600000	440250000	557650000	698560000	498180000	605500000	557040000	525720000	635240000	7	6	12	8
>AT1G02090.2 | Symbols: FUS5, CSN7, COP15, ATCSN7 | Proteasome component (PCI) domain protein | chr1:387647-389568 REVERSE LENGTH=225;>AT1G02090.3 | Symbols: FUS5, CSN7, COP15, ATCSN7 | Proteasome component (PCI) domain protein | chr1:388223-389568 REVERSE LENGTH=237;>AT1G02090.1 | Symbols: FUS5, CSN7, COP15, ATCSN7 | Proteasome component (PCI) domain protein | chr1:387479-389568 REVERSE LENGTH=2…	>AT1G02090.2 | Symbols: FUS5, CSN7, COP15, ATCSN7 | Proteasome component (PCI) domain protein | chr1:387647-389568 REVERSE LENGTH=225;>AT1G02090.3 | Symbols: FUS5, CSN7, COP15, ATCSN7 | Proteasome component (PCI) domain protein | chr1:388223-389568 REVERSE LENGTH=237;>AT1G02090.1 | Symbols: FUS5, CSN7, COP15, ATCSN7 | Proteasome component (PCI) domain protein | chr1:387479-389568 REVERSE LENGTH=2…	2;2;2	2;2;2	2;2;2	>AT1G02090.2 | Symbols: FUS5, CSN7, COP15, ATCSN7 | Proteasome component (PCI) domain protein | chr1:387647-389568 REVERSE LENGTH=225;>AT1G02090.3 | Symbols: FUS5, CSN7, COP15, ATCSN7 | Proteasome component (PCI) domain protein | chr1:388223-389568 REVERSE	3	2	2	2	0	0	2	1	0	0	2	1	0	0	2	1	9.8	9.8	9.8	25.471	225	225;237;260			2	1	0.00012982	0	0	9.8	4.9	60337000	0	0	37762000	22575000	0	0	0	28359000	0	0	0	1
>AT1G02120.1 | Symbols: VAD1 | GRAM domain family protein | chr1:395761-399720 FORWARD LENGTH=598	>AT1G02120.1 | Symbols: VAD1 | GRAM domain family protein | chr1:395761-399720 FORWARD LENGTH=598	3	3	3	>AT1G02120.1 | Symbols: VAD1 | GRAM domain family protein | chr1:395761-399720 FORWARD LENGTH=598	1	3	3	3	1	3	2	2	1	3	2	2	1	3	2	2	6.4	6.4	6.4	67.701	598	598	1	3	2	2	1.411e-13	3	6.4	4.7	4.7	130670000	21573000	25889000	38981000	44223000	0	25854000	45924000	55876000	1	0	2	2
>AT1G02130.1 | Symbols: ATRAB1B, ARA5, ARA-5, ATRABD2A, RABD2A, RA-5 | RAS 5 | chr1:400350-401788 REVERSE LENGTH=203	>AT1G02130.1 | Symbols: ATRAB1B, ARA5, ARA-5, ATRABD2A, RABD2A, RA-5 | RAS 5 | chr1:400350-401788 REVERSE LENGTH=203	5	2	2	>AT1G02130.1 | Symbols: ATRAB1B, ARA5, ARA-5, ATRABD2A, RABD2A, RA-5 | RAS 5 | chr1:400350-401788 REVERSE LENGTH=203	1	5	2	2	5	5	4	4	2	2	1	2	2	2	1	2	31	16.7	16.7	22.648	203	203	3	2	2	2	3.4594e-21	31	31	23.2	26.1	1040900000	511010000	359870000	149880000	20114000	497330000	421180000	0	0	1	2	1	0
>AT1G02140.1 | Symbols: MEE63, MAGO, HAP1 | mago nashi family protein | chr1:403467-404401 REVERSE LENGTH=150	>AT1G02140.1 | Symbols: MEE63, MAGO, HAP1 | mago nashi family protein | chr1:403467-404401 REVERSE LENGTH=150	4	4	4	>AT1G02140.1 | Symbols: MEE63, MAGO, HAP1 | mago nashi family protein | chr1:403467-404401 REVERSE LENGTH=150	1	4	4	4	3	3	4	4	3	3	4	4	3	3	4	4	38.7	38.7	38.7	17.458	150	150	6	4	6	6	3.6283e-58	27.3	27.3	38.7	38.7	2572200000	676570000	649180000	677410000	569050000	833610000	777450000	625890000	579970000	9	3	5	7
>AT1G02150.1 | Symbols: | Tetratricopeptide repeat (TPR)-like superfamily protein | chr1:408779-410433 FORWARD LENGTH=524	>AT1G02150.1 | Symbols: | Tetratricopeptide repeat (TPR)-like superfamily protein | chr1:408779-410433 FORWARD LENGTH=524	1	1	1	>AT1G02150.1 | Symbols: | Tetratricopeptide repeat (TPR)-like superfamily protein | chr1:408779-410433 FORWARD LENGTH=524	1	1	1	1	0	0	1	1	0	0	1	1	0	0	1	1	3.2	3.2	3.2	59.882	524	524			1	1	0.0013843	0	0	3.2	3.2	39099000	0	0	20660000	18439000	0	0	0	23164000	0	0	1	0
>AT1G02180.1 | Symbols: | ferredoxin-related | chr1:413619-414505 REVERSE LENGTH=226	>AT1G02180.1 | Symbols: | ferredoxin-related | chr1:413619-414505 REVERSE LENGTH=226	1	1	1	>AT1G02180.1 | Symbols: | ferredoxin-related | chr1:413619-414505 REVERSE LENGTH=226	1	1	1	1	0	1	1	1	0	1	1	1	0	1	1	1	6.2	6.2	6.2	24.787	226	226		1	1	1	5.5513e-09	0	6.2	6.2	6.2	48095000	0	7869200	23940000	16286000	0	0	0	20459000	0	1	1	1
>AT1G02305.1 | Symbols: | Cysteine proteinases superfamily protein | chr1:455816-457974 FORWARD LENGTH=362;>AT1G02300.1 | Symbols: | Cysteine proteinases superfamily protein | chr1:453288-455376 FORWARD LENGTH=379	>AT1G02305.1 | Symbols: | Cysteine proteinases superfamily protein | chr1:455816-457974 FORWARD LENGTH=362	7;1	7;1	7;1	>AT1G02305.1 | Symbols: | Cysteine proteinases superfamily protein | chr1:455816-457974 FORWARD LENGTH=362	2	7	7	7	4	4	6	6	4	4	6	6	4	4	6	6	20.2	20.2	20.2	40.033	362	362;379	4	6	8	8	3.5111e-30	14.6	11.6	17.7	17.7	6649800000	824490000	2664300000	1616800000	1544300000	1745300000	2271400000	1909200000	1630000000	3	2	7	6
>AT1G02410.1 | Symbols: | cytochrome c oxidase assembly protein CtaG / Cox11 family | chr1:491300-492762 FORWARD LENGTH=287	>AT1G02410.1 | Symbols: | cytochrome c oxidase assembly protein CtaG / Cox11 family | chr1:491300-492762 FORWARD LENGTH=287	2	2	2	>AT1G02410.1 | Symbols: | cytochrome c oxidase assembly protein CtaG / Cox11 family | chr1:491300-492762 FORWARD LENGTH=287	1	2	2	2	2	2	1	2	2	2	1	2	2	2	1	2	8.4	8.4	8.4	32.604	287	287	2	2	1	2	2.1421e-07	8.4	8.4	4.9	8.4	92236000	19960000	14140000	26466000	31670000	0	0	0	39786000	1	0	1	0
>AT1G02500.2 | Symbols: SAM1, SAM-1, MAT1, AtSAM1 | S-adenosylmethionine synthetase 1 | chr1:519037-520218 FORWARD LENGTH=393;>AT1G02500.1 | Symbols: SAM1, SAM-1, MAT1, AtSAM1 | S-adenosylmethionine synthetase 1 | chr1:519037-520218 FORWARD LENGTH=393	>AT1G02500.2 | Symbols: SAM1, SAM-1, MAT1, AtSAM1 | S-adenosylmethionine synthetase 1 | chr1:519037-520218 FORWARD LENGTH=393;>AT1G02500.1 | Symbols: SAM1, SAM-1, MAT1, AtSAM1 | S-adenosylmethionine synthetase 1 | chr1:519037-520218 FORWARD LENGTH=393	15;15	4;4	4;4	>AT1G02500.2 | Symbols: SAM1, SAM-1, MAT1, AtSAM1 | S-adenosylmethionine synthetase 1 | chr1:519037-520218 FORWARD LENGTH=393;>AT1G02500.1 | Symbols: SAM1, SAM-1, MAT1, AtSAM1 | S-adenosylmethionine synthetase 1 | chr1:519037-520218 FORWARD LENGTH=393	2	15	4	4	15	12	15	15	4	2	4	4	4	2	4	4	48.9	12.7	12.7	43.158	393	393;393	7	4	6	6	1.6492e-102	48.9	38.4	48.9	48.9	1294500000	340550000	293050000	379220000	281630000	286810000	385380000	351920000	279480000	3	0	5	4
>AT1G02520.1 | Symbols: PGP11 | P-glycoprotein 11 | chr1:524134-528745 FORWARD LENGTH=1278;>AT1G02530.1 | Symbols: PGP12 | P-glycoprotein 12 | chr1:529836-534542 FORWARD LENGTH=1273	>AT1G02520.1 | Symbols: PGP11 | P-glycoprotein 11 | chr1:524134-528745 FORWARD LENGTH=1278;>AT1G02530.1 | Symbols: PGP12 | P-glycoprotein 12 | chr1:529836-534542 FORWARD LENGTH=1273	12;7	5;3	4;2	>AT1G02520.1 | Symbols: PGP11 | P-glycoprotein 11 | chr1:524134-528745 FORWARD LENGTH=1278;>AT1G02530.1 | Symbols: PGP12 | P-glycoprotein 12 | chr1:529836-534542 FORWARD LENGTH=1273	2	12	5	4	9	9	11	12	4	4	5	5	3	3	4	4	15.7	7	5.6	137.67	1278	1278;1273	4	4	5	5	3.1194e-127	12.3	13	15.1	15.7	456030000	130220000	90253000	145840000	89720000	146870000	143040000	117910000	97368000	2	2	4	4
>AT1G02560.1 | Symbols: CLPP5, NCLPP5, NCLPP1 | nuclear encoded CLP protease 5 | chr1:538000-539805 FORWARD LENGTH=298	>AT1G02560.1 | Symbols: CLPP5, NCLPP5, NCLPP1 | nuclear encoded CLP protease 5 | chr1:538000-539805 FORWARD LENGTH=298	3	3	3	>AT1G02560.1 | Symbols: CLPP5, NCLPP5, NCLPP1 | nuclear encoded CLP protease 5 | chr1:538000-539805 FORWARD LENGTH=298	1	3	3	3	1	1	3	1	1	1	3	1	1	1	3	1	15.4	15.4	15.4	32.356	298	298	1	1	3	2	2.4439e-30	2.3	2.3	15.4	9.1	243340000	98317000	64931000	26595000	53493000	0	0	29189000	0	1	1	2	2
>AT1G02640.1 | Symbols: BXL2, ATBXL2 | beta-xylosidase 2 | chr1:564293-567580 FORWARD LENGTH=768	>AT1G02640.1 | Symbols: BXL2, ATBXL2 | beta-xylosidase 2 | chr1:564293-567580 FORWARD LENGTH=768	2	2	2	>AT1G02640.1 | Symbols: BXL2, ATBXL2 | beta-xylosidase 2 | chr1:564293-567580 FORWARD LENGTH=768	1	2	2	2	2	1	0	1	2	1	0	1	2	1	0	1	3.3	3.3	3.3	82.984	768	768	2	2		1	3.0878e-10	3.3	1.6	0	1.6	63657000	34526000	22871000	0	6260100	34526000	0	0	0	2	1	0	0
>AT1G02690.1 | Symbols: IMPA-6 | importin alpha isoform 6 | chr1:584397-587036 FORWARD LENGTH=538;>AT1G02690.2 | Symbols: IMPA-6 | importin alpha isoform 6 | chr1:584397-587036 FORWARD LENGTH=539	>AT1G02690.1 | Symbols: IMPA-6 | importin alpha isoform 6 | chr1:584397-587036 FORWARD LENGTH=538;>AT1G02690.2 | Symbols: IMPA-6 | importin alpha isoform 6 | chr1:584397-587036 FORWARD LENGTH=539	11;11	9;9	8;8	>AT1G02690.1 | Symbols: IMPA-6 | importin alpha isoform 6 | chr1:584397-587036 FORWARD LENGTH=538;>AT1G02690.2 | Symbols: IMPA-6 | importin alpha isoform 6 | chr1:584397-587036 FORWARD LENGTH=539	2	11	9	8	10	10	8	7	8	8	6	5	7	7	5	4	35.5	30.7	27.7	59.388	538	538;539	8	8	6	5	3.8463e-51	32.5	31	22.5	19.1	1616000000	508690000	475260000	371480000	260520000	546900000	501350000	369000000	364600000	7	4	5	4
>AT5G16910.1 | Symbols: ATCSLD2, CSLD2 | cellulose-synthase like D2 | chr5:5561679-5565290 FORWARD LENGTH=1145;>AT3G03050.1 | Symbols: CSLD3, KJK, ATCSLD3 | cellulose synthase-like D3 | chr3:687873-691629 FORWARD LENGTH=1145;>AT1G02730.1 | Symbols: ATCSLD5, CSLD5, SOS6 | cellulose synthase-like D5 | chr1:594697-598473 REVERSE LENGTH=1181;>AT2G33100.1 | Symbols: ATCSLD1, CSLD1 | cellulose synthase…	>AT5G16910.1 | Symbols: ATCSLD2, CSLD2 | cellulose-synthase like D2 | chr5:5561679-5565290 FORWARD LENGTH=1145;>AT3G03050.1 | Symbols: CSLD3, KJK, ATCSLD3 | cellulose synthase-like D3 | chr3:687873-691629 FORWARD LENGTH=1145;>AT1G02730.1 | Symbols: ATCSLD5, CSLD5, SOS6 | cellulose synthase-like D5 | chr1:594697-598473 REVERSE LENGTH=1181;>AT2G33100.1 | Symbols: ATCSLD1, CSLD1 | cellulose synthase…	2;2;2;1	1;1;1;1	1;1;1;1	>AT5G16910.1 | Symbols: ATCSLD2, CSLD2 | cellulose-synthase like D2 | chr5:5561679-5565290 FORWARD LENGTH=1145;>AT3G03050.1 | Symbols: CSLD3, KJK, ATCSLD3 | cellulose synthase-like D3 | chr3:687873-691629 FORWARD LENGTH=1145;>AT1G02730.1 | Symbols: ATCSLD5	4	2	1	1	2	1	0	0	1	0	0	0	1	0	0	0	1.7	0.9	0.9	128.36	1145	1145;1145;1181;1036	1				7.6458e-08	1.7	0.8	0	0	0	0	0	0	0	0	0	0	0	0	0	0	0
>AT1G02780.1 | Symbols: emb2386 | Ribosomal protein L19e family protein | chr1:608120-609391 REVERSE LENGTH=214	>AT1G02780.1 | Symbols: emb2386 | Ribosomal protein L19e family protein | chr1:608120-609391 REVERSE LENGTH=214	6	3	3	>AT1G02780.1 | Symbols: emb2386 | Ribosomal protein L19e family protein | chr1:608120-609391 REVERSE LENGTH=214	1	6	3	3	6	6	6	5	3	3	3	3	3	3	3	3	33.2	24.3	24.3	24.606	214	214	6	5	7	7	7.7366e-68	33.2	33.2	33.2	32.2	8713400000	2195400000	2378100000	2343700000	1796100000	2142400000	2880500000	2170700000	1795800000	6	5	7	7
>AT1G02816.1 | Symbols: | Protein of unknown function, DUF538 | chr1:621637-622137 FORWARD LENGTH=166	>AT1G02816.1 | Symbols: | Protein of unknown function, DUF538 | chr1:621637-622137 FORWARD LENGTH=166	2	1	1	>AT1G02816.1 | Symbols: | Protein of unknown function, DUF538 | chr1:621637-622137 FORWARD LENGTH=166	1	2	1	1	1	2	2	2	1	1	1	1	1	1	1	1	12	5.4	5.4	18.496	166	166	1	1	1	2	2.9251e-07	5.4	12	12	12	769380000	216560000	218190000	129850000	204780000	0	0	0	257250000	1	0	1	2
>AT1G02840.2 | Symbols: SR1, ATSRP34, SRP34, SR34, At-SR34 | RNA-binding (RRM/RBD/RNP motifs) family protein | chr1:626918-628995 FORWARD LENGTH=285;>AT1G02840.3 | Symbols: SR1, ATSRP34, SRP34, SR34, At-SR34 | RNA-binding (RRM/RBD/RNP motifs) family protein | chr1:626918-629583 FORWARD LENGTH=303;>AT1G02840.1 | Symbols: SR1, ATSRP34, SRP34, SR34, At-SR34 | RNA-binding (RRM/RBD/RNP motifs) family …	>AT1G02840.2 | Symbols: SR1, ATSRP34, SRP34, SR34, At-SR34 | RNA-binding (RRM/RBD/RNP motifs) family protein | chr1:626918-628995 FORWARD LENGTH=285;>AT1G02840.3 | Symbols: SR1, ATSRP34, SRP34, SR34, At-SR34 | RNA-binding (RRM/RBD/RNP motifs) family protein | chr1:626918-629583 FORWARD LENGTH=303;>AT1G02840.1 | Symbols: SR1, ATSRP34, SRP34, SR34, At-SR34 | RNA-binding (RRM/RBD/RNP motifs) family …	3;3;3	3;3;3	2;2;2	>AT1G02840.2 | Symbols: SR1, ATSRP34, SRP34, SR34, At-SR34 | RNA-binding (RRM/RBD/RNP motifs) family protein | chr1:626918-628995 FORWARD LENGTH=285;>AT1G02840.3 | Symbols: SR1, ATSRP34, SRP34, SR34, At-SR34 | RNA-binding (RRM/RBD/RNP motifs) family protei	3	3	3	2	3	3	2	3	3	3	2	3	2	2	2	2	12.6	12.6	9.8	31.967	285	285;303;303	3	3	2	3	1.0477e-15	12.6	12.6	9.8	12.6	1537800000	614190000	419330000	251520000	252780000	587620000	441040000	358440000	295520000	3	2	2	1
>AT1G02880.2 | Symbols: TPK1 | thiamin pyrophosphokinase1 | chr1:643063-644476 REVERSE LENGTH=264;>AT1G02880.3 | Symbols: TPK1 | thiamin pyrophosphokinase1 | chr1:643063-644485 REVERSE LENGTH=267;>AT1G02880.4 | Symbols: TPK1 | thiamin pyrophosphokinase1 | chr1:643063-643921 REVERSE LENGTH=180;>AT1G02880.1 | Symbols: TPK1 | thiamin pyrophosphokinase1 | chr1:643063-643972 REVERSE LENGTH=197;>AT2G44…	>AT1G02880.2 | Symbols: TPK1 | thiamin pyrophosphokinase1 | chr1:643063-644476 REVERSE LENGTH=264;>AT1G02880.3 | Symbols: TPK1 | thiamin pyrophosphokinase1 | chr1:643063-644485 REVERSE LENGTH=267;>AT1G02880.4 | Symbols: TPK1 | thiamin pyrophosphokinase1 | chr1:643063-643921 REVERSE LENGTH=180;>AT1G02880.1 | Symbols: TPK1 | thiamin pyrophosphokinase1 | chr1:643063-643972 REVERSE LENGTH=197;>AT2G44…	5;5;4;4;3;3	5;5;4;4;3;3	5;5;4;4;3;3	>AT1G02880.2 | Symbols: TPK1 | thiamin pyrophosphokinase1 | chr1:643063-644476 REVERSE LENGTH=264;>AT1G02880.3 | Symbols: TPK1 | thiamin pyrophosphokinase1 | chr1:643063-644485 REVERSE LENGTH=267;>AT1G02880.4 | Symbols: TPK1 | thiamin pyrophosphokinase1 |	6	5	5	5	3	4	5	5	3	4	5	5	3	4	5	5	28.8	28.8	28.8	29.589	264	264;267;180;197;265;267	4	6	7	7	4.4688e-53	18.6	23.1	28.8	28.8	1176600000	291900000	285260000	318340000	281080000	395130000	404320000	264840000	241570000	3	2	4	8
>AT1G02920.1 | Symbols: ATGSTF7, GST11, ATGSTF8, GSTF7, ATGST11 | glutathione S-transferase 7 | chr1:658886-659705 REVERSE LENGTH=209;>AT1G02930.2 | Symbols: GSTF6 | glutathione S-transferase 6 | chr1:661363-662191 REVERSE LENGTH=208;>AT1G02930.1 | Symbols: ATGSTF6, GST1, ERD11, ATGSTF3, GSTF6, ATGST1 | glutathione S-transferase 6 | chr1:661363-662191 REVERSE LENGTH=208	>AT1G02920.1 | Symbols: ATGSTF7, GST11, ATGSTF8, GSTF7, ATGST11 | glutathione S-transferase 7 | chr1:658886-659705 REVERSE LENGTH=209;>AT1G02930.2 | Symbols: GSTF6 | glutathione S-transferase 6 | chr1:661363-662191 REVERSE LENGTH=208;>AT1G02930.1 | Symbols: ATGSTF6, GST1, ERD11, ATGSTF3, GSTF6, ATGST1 | glutathione S-transferase 6 | chr1:661363-662191 REVERSE LENGTH=208	8;6;6	6;4;4	6;4;4	>AT1G02920.1 | Symbols: ATGSTF7, GST11, ATGSTF8, GSTF7, ATGST11 | glutathione S-transferase 7 | chr1:658886-659705 REVERSE LENGTH=209;>AT1G02930.2 | Symbols: GSTF6 | glutathione S-transferase 6 | chr1:661363-662191 REVERSE LENGTH=208;>AT1G02930.1 | Symbols	3	8	6	6	7	5	8	8	6	4	6	6	6	4	6	6	41.6	37.3	37.3	23.598	209	209;208;208	10	6	8	9	1.3258e-26	41.1	26.8	41.6	41.6	7943800000	2240300000	2187100000	1839100000	1677200000	2241700000	1983400000	2320600000	2036100000	7	3	8	4
>AT1G02950.3 | Symbols: ATGSTF4, GST31, GSTF4 | glutathione S-transferase F4 | chr1:665308-666420 REVERSE LENGTH=243;>AT1G02950.1 | Symbols: ATGSTF4, GST31, GSTF4 | glutathione S-transferase F4 | chr1:665308-666420 REVERSE LENGTH=243;>AT1G02950.2 | Symbols: ATGSTF4, GST31, GSTF4 | glutathione S-transferase F4 | chr1:665308-666420 REVERSE LENGTH=245;>AT1G02950.4 | Symbols: ATGSTF4, GST31, GSTF4 | …	>AT1G02950.3 | Symbols: ATGSTF4, GST31, GSTF4 | glutathione S-transferase F4 | chr1:665308-666420 REVERSE LENGTH=243;>AT1G02950.1 | Symbols: ATGSTF4, GST31, GSTF4 | glutathione S-transferase F4 | chr1:665308-666420 REVERSE LENGTH=243;>AT1G02950.2 | Symbols: ATGSTF4, GST31, GSTF4 | glutathione S-transferase F4 | chr1:665308-666420 REVERSE LENGTH=245;>AT1G02950.4 | Symbols: ATGSTF4, GST31, GSTF4 | …	5;5;5;3	5;5;5;3	5;5;5;3	>AT1G02950.3 | Symbols: ATGSTF4, GST31, GSTF4 | glutathione S-transferase F4 | chr1:665308-666420 REVERSE LENGTH=243;>AT1G02950.1 | Symbols: ATGSTF4, GST31, GSTF4 | glutathione S-transferase F4 | chr1:665308-666420 REVERSE LENGTH=243;>AT1G02950.2 | Symbols	4	5	5	5	5	5	5	4	5	5	5	4	5	5	5	4	28.8	28.8	28.8	28.531	243	243;243;245;217	6	6	7	6	3.9462e-20	28.8	28.8	28.8	25.9	3021100000	790810000	662320000	736090000	831840000	763940000	896760000	857280000	875680000	5	4	3	4
>AT1G03060.1 | Symbols: SPI | Beige/BEACH domain ;WD domain, G-beta repeat protein | chr1:712971-726891 REVERSE LENGTH=3601	>AT1G03060.1 | Symbols: SPI | Beige/BEACH domain ;WD domain, G-beta repeat protein | chr1:712971-726891 REVERSE LENGTH=3601	2	2	2	>AT1G03060.1 | Symbols: SPI | Beige/BEACH domain ;WD domain, G-beta repeat protein | chr1:712971-726891 REVERSE LENGTH=3601	1	2	2	2	2	2	2	0	2	2	2	0	2	2	2	0	1.1	1.1	1.1	400.89	3601	3601	3	2	2		4.9101e-11	1.1	1.1	1.1	0	223380000	156710000	39404000	27262000	0	108410000	36619000	28130000	0	2	1	1	0
>AT1G03090.2 | Symbols: MCCA | methylcrotonyl-CoA carboxylase alpha chain, mitochondrial / 3-methylcrotonyl-CoA carboxylase 1 (MCCA) | chr1:739715-743819 FORWARD LENGTH=734;>AT1G03090.1 | Symbols: MCCA | methylcrotonyl-CoA carboxylase alpha chain, mitochondrial / 3-methylcrotonyl-CoA carboxylase 1 (MCCA) | chr1:739715-743819 FORWARD LENGTH=714	>AT1G03090.2 | Symbols: MCCA | methylcrotonyl-CoA carboxylase alpha chain, mitochondrial / 3-methylcrotonyl-CoA carboxylase 1 (MCCA) | chr1:739715-743819 FORWARD LENGTH=734;>AT1G03090.1 | Symbols: MCCA | methylcrotonyl-CoA carboxylase alpha chain, mitochondrial / 3-methylcrotonyl-CoA carboxylase 1 (MCCA) | chr1:739715-743819 FORWARD LENGTH=714	5;3	5;3	5;3	>AT1G03090.2 | Symbols: MCCA | methylcrotonyl-CoA carboxylase alpha chain, mitochondrial / 3-methylcrotonyl-CoA carboxylase 1 (MCCA) | chr1:739715-743819 FORWARD LENGTH=734;>AT1G03090.1 | Symbols: MCCA | methylcrotonyl-CoA carboxylase alpha chain, mitochon	2	5	5	5	5	4	4	5	5	4	4	5	5	4	4	5	10.2	10.2	10.2	80.45	734	734;714	5	4	4	5	1.7217e-24	10.2	8.7	8.7	10.2	1589000000	530220000	417320000	343330000	298110000	525100000	456810000	387820000	384350000	4	2	2	5
>AT1G03110.1 | Symbols: TRM82, AtTRM82 | Transducin/WD40 repeat-like superfamily protein | chr1:749359-751796 FORWARD LENGTH=427	>AT1G03110.1 | Symbols: TRM82, AtTRM82 | Transducin/WD40 repeat-like superfamily protein | chr1:749359-751796 FORWARD LENGTH=427	3	3	3	>AT1G03110.1 | Symbols: TRM82, AtTRM82 | Transducin/WD40 repeat-like superfamily protein | chr1:749359-751796 FORWARD LENGTH=427	1	3	3	3	1	3	3	3	1	3	3	3	1	3	3	3	9.1	9.1	9.1	46.443	427	427	1	3	3	3	1.0906e-09	1.9	9.1	9.1	9.1	327980000	148260000	90169000	51306000	38248000	0	113390000	45166000	47907000	1	2	0	0
>AT1G03130.1 | Symbols: PSAD-2 | photosystem I subunit D-2 | chr1:753528-754142 REVERSE LENGTH=204;>AT4G02770.1 | Symbols: PSAD-1 | photosystem I subunit D-1 | chr4:1229247-1229873 REVERSE LENGTH=208	>AT1G03130.1 | Symbols: PSAD-2 | photosystem I subunit D-2 | chr1:753528-754142 REVERSE LENGTH=204;>AT4G02770.1 | Symbols: PSAD-1 | photosystem I subunit D-1 | chr4:1229247-1229873 REVERSE LENGTH=208	4;4	4;4	4;4	>AT1G03130.1 | Symbols: PSAD-2 | photosystem I subunit D-2 | chr1:753528-754142 REVERSE LENGTH=204;>AT4G02770.1 | Symbols: PSAD-1 | photosystem I subunit D-1 | chr4:1229247-1229873 REVERSE LENGTH=208	2	4	4	4	4	4	4	3	4	4	4	3	4	4	4	3	29.9	29.9	29.9	22.306	204	204;208	7	6	6	5	1.0272e-50	29.9	29.9	29.9	26.5	2475700000	1019900000	898930000	233390000	323460000	917600000	968950000	245940000	362030000	6	5	2	3
>AT1G03220.1 | Symbols: | Eukaryotic aspartyl protease family protein | chr1:787143-788444 FORWARD LENGTH=433	>AT1G03220.1 | Symbols: | Eukaryotic aspartyl protease family protein | chr1:787143-788444 FORWARD LENGTH=433	14	9	9	>AT1G03220.1 | Symbols: | Eukaryotic aspartyl protease family protein | chr1:787143-788444 FORWARD LENGTH=433	1	14	9	9	11	10	14	14	7	7	9	9	7	7	9	9	41.1	30.3	30.3	45.717	433	433	9	8	14	14	5.3744e-102	32.3	29.1	41.1	41.1	23265000000	6636500000	5271100000	5876500000	5480600000	6218600000	5767500000	6623500000	7159000000	9	7	14	17
>AT1G03230.1 | Symbols: | Eukaryotic aspartyl protease family protein | chr1:790110-791414 FORWARD LENGTH=434	>AT1G03230.1 | Symbols: | Eukaryotic aspartyl protease family protein | chr1:790110-791414 FORWARD LENGTH=434	14	14	9	>AT1G03230.1 | Symbols: | Eukaryotic aspartyl protease family protein | chr1:790110-791414 FORWARD LENGTH=434	1	14	14	9	10	9	14	14	10	9	14	14	6	6	9	9	37.6	37.6	26.7	46.148	434	434	16	15	22	20	3.6279e-100	27.4	24.2	37.6	37.6	19523000000	6329600000	4639500000	4647800000	3905900000	6902900000	6376200000	3809900000	4064700000	17	13	22	18
>AT1G03330.1 | Symbols: | Small nuclear ribonucleoprotein family protein | chr1:818161-819297 REVERSE LENGTH=93	>AT1G03330.1 | Symbols: | Small nuclear ribonucleoprotein family protein | chr1:818161-819297 REVERSE LENGTH=93	2	2	2	>AT1G03330.1 | Symbols: | Small nuclear ribonucleoprotein family protein | chr1:818161-819297 REVERSE LENGTH=93	1	2	2	2	1	1	2	2	1	1	2	2	1	1	2	2	28	28	28	10.694	93	93	2	2	2	3	4.3501e-11	14	14	28	28	1138400000	342000000	180620000	298260000	317480000	368740000	246510000	392970000	264490000	2	0	2	1
>AT1G03475.1 | Symbols: LIN2, HEMF1, ATCPO-I | Coproporphyrinogen III oxidase | chr1:869302-871175 REVERSE LENGTH=386	>AT1G03475.1 | Symbols: LIN2, HEMF1, ATCPO-I | Coproporphyrinogen III oxidase | chr1:869302-871175 REVERSE LENGTH=386	3	3	3	>AT1G03475.1 | Symbols: LIN2, HEMF1, ATCPO-I | Coproporphyrinogen III oxidase | chr1:869302-871175 REVERSE LENGTH=386	1	3	3	3	3	3	2	2	3	3	2	2	3	3	2	2	8	8	8	43.796	386	386	3	3	3	2	9.1706e-17	8	8	6	5.4	569010000	234960000	173230000	110020000	50813000	189720000	175640000	101060000	102910000	2	2	1	1
>AT1G03680.1 | Symbols: ATHM1, TRX-M1, ATM1, THM1 | thioredoxin M-type 1 | chr1:916990-917865 REVERSE LENGTH=179	>AT1G03680.1 | Symbols: ATHM1, TRX-M1, ATM1, THM1 | thioredoxin M-type 1 | chr1:916990-917865 REVERSE LENGTH=179	1	1	1	>AT1G03680.1 | Symbols: ATHM1, TRX-M1, ATM1, THM1 | thioredoxin M-type 1 | chr1:916990-917865 REVERSE LENGTH=179	1	1	1	1	1	1	0	0	1	1	0	0	1	1	0	0	8.9	8.9	8.9	19.664	179	179	1	1			1.6383e-07	8.9	8.9	0	0	0	0	0	0	0	0	0	0	0	0	0	0	0
>AT1G03860.3 | Symbols: ATPHB2, PHB2 | prohibitin 2 | chr1:979611-981157 REVERSE LENGTH=286;>AT1G03860.1 | Symbols: ATPHB2, PHB2 | prohibitin 2 | chr1:979611-981157 REVERSE LENGTH=286;>AT1G03860.2 | Symbols: ATPHB2, PHB2 | prohibitin 2 | chr1:979611-980870 REVERSE LENGTH=221	>AT1G03860.3 | Symbols: ATPHB2, PHB2 | prohibitin 2 | chr1:979611-981157 REVERSE LENGTH=286;>AT1G03860.1 | Symbols: ATPHB2, PHB2 | prohibitin 2 | chr1:979611-981157 REVERSE LENGTH=286;>AT1G03860.2 | Symbols: ATPHB2, PHB2 | prohibitin 2 | chr1:979611-980870 REVERSE LENGTH=221	8;8;7	5;5;4	4;4;3	>AT1G03860.3 | Symbols: ATPHB2, PHB2 | prohibitin 2 | chr1:979611-981157 REVERSE LENGTH=286;>AT1G03860.1 | Symbols: ATPHB2, PHB2 | prohibitin 2 | chr1:979611-981157 REVERSE LENGTH=286;>AT1G03860.2 | Symbols: ATPHB2, PHB2 | prohibitin 2 | chr1:979611-980870	3	8	5	4	7	8	8	8	4	5	5	5	4	4	4	4	38.5	26.2	23.1	31.81	286	286;286;221	8	8	8	9	1.6595e-66	35.3	38.5	38.5	38.5	11524000000	2957000000	2693300000	2638500000	3234700000	2751600000	2572900000	2922500000	2955800000	11	7	9	8
>AT1G03870.1 | Symbols: FLA9 | FASCICLIN-like arabinoogalactan 9 | chr1:982625-983368 REVERSE LENGTH=247	>AT1G03870.1 | Symbols: FLA9 | FASCICLIN-like arabinoogalactan 9 | chr1:982625-983368 REVERSE LENGTH=247	5	5	4	>AT1G03870.1 | Symbols: FLA9 | FASCICLIN-like arabinoogalactan 9 | chr1:982625-983368 REVERSE LENGTH=247	1	5	5	4	2	3	5	4	2	3	5	4	1	2	4	3	25.1	25.1	21.5	26.115	247	247	5	6	9	8	3.6015e-42	9.7	18.2	25.1	23.9	8169300000	2316500000	1947700000	2165500000	1739700000	1962900000	897610000	1616500000	2333400000	8	7	10	9
>AT1G03880.1 | Symbols: CRU2, CRB | cruciferin 2 | chr1:985786-987916 FORWARD LENGTH=455	>AT1G03880.1 | Symbols: CRU2, CRB | cruciferin 2 | chr1:985786-987916 FORWARD LENGTH=455	3	2	2	>AT1G03880.1 | Symbols: CRU2, CRB | cruciferin 2 | chr1:985786-987916 FORWARD LENGTH=455	1	3	2	2	3	3	2	3	2	2	1	2	2	2	1	2	10.3	7.7	7.7	50.558	455	455	2	2	1	2	4.0113e-33	10.3	10.3	5.5	10.3	436350000	166340000	123180000	72692000	74137000	143860000	133560000	0	121540000	1	1	1	1
>AT1G04040.1 | Symbols: | HAD superfamily, subfamily IIIB acid phosphatase | chr1:1042564-1043819 REVERSE LENGTH=271	>AT1G04040.1 | Symbols: | HAD superfamily, subfamily IIIB acid phosphatase | chr1:1042564-1043819 REVERSE LENGTH=271	5	4	4	>AT1G04040.1 | Symbols: | HAD superfamily, subfamily IIIB acid phosphatase | chr1:1042564-1043819 REVERSE LENGTH=271	1	5	4	4	3	4	4	5	3	4	4	4	3	4	4	4	18.8	16.2	16.2	31.096	271	271	4	6	7	7	3.6687e-30	11.1	16.2	16.2	18.8	3001300000	583510000	780240000	825210000	812350000	766720000	898150000	726090000	1002300000	2	2	6	4
>AT1G04080.1 | Symbols: PRP39 | Tetratricopeptide repeat (TPR)-like superfamily protein | chr1:1051803-1056550 FORWARD LENGTH=768;>AT1G04080.3 | Symbols: PRP39 | Tetratricopeptide repeat (TPR)-like superfamily protein | chr1:1051803-1056550 FORWARD LENGTH=823;>AT1G04080.2 | Symbols: PRP39 | Tetratricopeptide repeat (TPR)-like superfamily protein | chr1:1053171-1056550 FORWARD LENGTH=582	>AT1G04080.1 | Symbols: PRP39 | Tetratricopeptide repeat (TPR)-like superfamily protein | chr1:1051803-1056550 FORWARD LENGTH=768;>AT1G04080.3 | Symbols: PRP39 | Tetratricopeptide repeat (TPR)-like superfamily protein | chr1:1051803-1056550 FORWARD LENGTH=823;>AT1G04080.2 | Symbols: PRP39 | Tetratricopeptide repeat (TPR)-like superfamily protein | chr1:1053171-1056550 FORWARD LENGTH=582	9;9;8	9;9;8	9;9;8	>AT1G04080.1 | Symbols: PRP39 | Tetratricopeptide repeat (TPR)-like superfamily protein | chr1:1051803-1056550 FORWARD LENGTH=768;>AT1G04080.3 | Symbols: PRP39 | Tetratricopeptide repeat (TPR)-like superfamily protein | chr1:1051803-1056550 FORWARD LENGTH=	3	9	9	9	8	8	7	8	8	8	7	8	8	8	7	8	16.5	16.5	16.5	85.241	768	768;823;582	9	8	8	8	6.412e-53	14.7	14.2	12.4	14.2	2065300000	618780000	558930000	540560000	346990000	476210000	648120000	588190000	568350000	5	4	7	6
>AT1G04120.2 | Symbols: MRP5 | multidrug resistance-associated protein 5 | chr1:1064848-1070396 REVERSE LENGTH=1509;>AT1G04120.1 | Symbols: ATMRP5, MRP5, ATABCC5, ABCC5 | multidrug resistance-associated protein 5 | chr1:1064848-1070396 REVERSE LENGTH=1514	>AT1G04120.2 | Symbols: MRP5 | multidrug resistance-associated protein 5 | chr1:1064848-1070396 REVERSE LENGTH=1509;>AT1G04120.1 | Symbols: ATMRP5, MRP5, ATABCC5, ABCC5 | multidrug resistance-associated protein 5 | chr1:1064848-1070396 REVERSE LENGTH=1514	4;4	4;4	4;4	>AT1G04120.2 | Symbols: MRP5 | multidrug resistance-associated protein 5 | chr1:1064848-1070396 REVERSE LENGTH=1509;>AT1G04120.1 | Symbols: ATMRP5, MRP5, ATABCC5, ABCC5 | multidrug resistance-associated protein 5 | chr1:1064848-1070396 REVERSE LENGTH=1514	2	4	4	4	3	3	3	3	3	3	3	3	3	3	3	3	4	4	4	168.06	1509	1509;1514	3	3	3	3	1.0167e-17	2.9	2.9	3	3	212780000	75269000	52277000	46416000	38813000	96512000	75980000	30223000	31452000	2	3	1	0
>AT1G04170.1 | Symbols: EIF2 GAMMA | eukaryotic translation initiation factor 2 gamma subunit | chr1:1097423-1099702 FORWARD LENGTH=465;>AT4G18330.2 | Symbols: | Translation elongation factor EF1A/initiation factor IF2gamma family protein | chr4:10126747-10128587 FORWARD LENGTH=471;>AT4G18330.1 | Symbols: | Translation elongation factor EF1A/initiation factor IF2gamma family protein | chr4:101267…	>AT1G04170.1 | Symbols: EIF2 GAMMA | eukaryotic translation initiation factor 2 gamma subunit | chr1:1097423-1099702 FORWARD LENGTH=465	14;4;3;1	14;4;3;1	14;4;3;1	>AT1G04170.1 | Symbols: EIF2 GAMMA | eukaryotic translation initiation factor 2 gamma subunit | chr1:1097423-1099702 FORWARD LENGTH=465	4	14	14	14	12	11	11	10	12	11	11	10	12	11	11	10	33.8	33.8	33.8	50.853	465	465;471;284;470	18	18	17	15	1.5099e-53	30.1	28	30.3	30.3	10369000000	2843900000	3068500000	2760200000	1696000000	2341300000	2731600000	3085100000	2629300000	11	13	11	12
>AT1G04190.1 | Symbols: TPR3 | Tetratricopeptide repeat (TPR)-like superfamily protein | chr1:1106617-1108557 REVERSE LENGTH=328	>AT1G04190.1 | Symbols: TPR3 | Tetratricopeptide repeat (TPR)-like superfamily protein | chr1:1106617-1108557 REVERSE LENGTH=328	2	2	2	>AT1G04190.1 | Symbols: TPR3 | Tetratricopeptide repeat (TPR)-like superfamily protein | chr1:1106617-1108557 REVERSE LENGTH=328	1	2	2	2	1	2	2	2	1	2	2	2	1	2	2	2	8.2	8.2	8.2	37.18	328	328	1	2	2	3	4.1051e-15	4.6	8.2	8.2	8.2	367970000	55071000	123130000	92361000	97415000	0	140930000	116240000	106000000	1	1	1	2
>AT1G04260.1 | Symbols: MPI7, MPIP7, PRA1.D | CAMV movement protein interacting protein 7 | chr1:1140749-1141297 REVERSE LENGTH=182	>AT1G04260.1 | Symbols: MPI7, MPIP7, PRA1.D | CAMV movement protein interacting protein 7 | chr1:1140749-1141297 REVERSE LENGTH=182	3	3	3	>AT1G04260.1 | Symbols: MPI7, MPIP7, PRA1.D | CAMV movement protein interacting protein 7 | chr1:1140749-1141297 REVERSE LENGTH=182	1	3	3	3	1	0	2	0	1	0	2	0	1	0	2	0	23.6	23.6	23.6	19.325	182	182	1		3		2.2022e-06	6	0	17.6	0	516610000	376380000	0	140230000	0	0	0	153910000	0	1	0	2	0
>AT1G04270.2 | Symbols: RPS15 | cytosolic ribosomal protein S15 | chr1:1141852-1142960 REVERSE LENGTH=151;>AT1G04270.1 | Symbols: RPS15 | cytosolic ribosomal protein S15 | chr1:1141852-1142960 REVERSE LENGTH=152	>AT1G04270.2 | Symbols: RPS15 | cytosolic ribosomal protein S15 | chr1:1141852-1142960 REVERSE LENGTH=151;>AT1G04270.1 | Symbols: RPS15 | cytosolic ribosomal protein S15 | chr1:1141852-1142960 REVERSE LENGTH=152	5;5	2;2	2;2	>AT1G04270.2 | Symbols: RPS15 | cytosolic ribosomal protein S15 | chr1:1141852-1142960 REVERSE LENGTH=151;>AT1G04270.1 | Symbols: RPS15 | cytosolic ribosomal protein S15 | chr1:1141852-1142960 REVERSE LENGTH=152	2	5	2	2	5	5	5	5	2	2	2	2	2	2	2	2	39.1	8.6	8.6	17.058	151	151;152	4	3	5	5	1.0443e-66	39.1	39.1	39.1	39.1	6480200000	660980000	602250000	3940400000	1276500000	422580000	449900000	2882300000	3516600000	3	3	5	4
>AT1G04280.1 | Symbols: | P-loop containing nucleoside triphosphate hydrolases superfamily protein | chr1:1143643-1146541 REVERSE LENGTH=534	>AT1G04280.1 | Symbols: | P-loop containing nucleoside triphosphate hydrolases superfamily protein | chr1:1143643-1146541 REVERSE LENGTH=534	2	2	2	>AT1G04280.1 | Symbols: | P-loop containing nucleoside triphosphate hydrolases superfamily protein | chr1:1143643-1146541 REVERSE LENGTH=534	1	2	2	2	1	2	1	1	1	2	1	1	1	2	1	1	4.9	4.9	4.9	59.977	534	534	1	2	1	1	4.2876e-14	3	4.9	3	3	137460000	21538000	67229000	23962000	24728000	0	0	0	31064000	1	1	1	1
>AT1G04410.1 | Symbols: | Lactate/malate dehydrogenase family protein | chr1:1189418-1191267 REVERSE LENGTH=332;>AT5G56720.1 | Symbols: | Lactate/malate dehydrogenase family protein | chr5:22945537-22946718 FORWARD LENGTH=339	>AT1G04410.1 | Symbols: | Lactate/malate dehydrogenase family protein | chr1:1189418-1191267 REVERSE LENGTH=332	16;1	16;1	9;0	>AT1G04410.1 | Symbols: | Lactate/malate dehydrogenase family protein | chr1:1189418-1191267 REVERSE LENGTH=332	2	16	16	9	13	13	14	15	13	13	14	15	8	7	7	8	65.4	65.4	42.8	35.571	332	332;339	24	21	24	26	8.2141e-265	54.5	57.2	54.5	65.4	36543000000	9326900000	8385100000	9580700000	9250200000	9429700000	8146600000	10263000000	10504000000	22	11	35	32
>AT1G04430.2 | Symbols: | S-adenosyl-L-methionine-dependent methyltransferases superfamily protein | chr1:1198860-1201301 FORWARD LENGTH=623;>AT1G04430.1 | Symbols: | S-adenosyl-L-methionine-dependent methyltransferases superfamily protein | chr1:1198860-1201301 FORWARD LENGTH=623	>AT1G04430.2 | Symbols: | S-adenosyl-L-methionine-dependent methyltransferases superfamily protein | chr1:1198860-1201301 FORWARD LENGTH=623;>AT1G04430.1 | Symbols: | S-adenosyl-L-methionine-dependent methyltransferases superfamily protein | chr1:1198860-1201301 FORWARD LENGTH=623	8;8	5;5	5;5	>AT1G04430.2 | Symbols: | S-adenosyl-L-methionine-dependent methyltransferases superfamily protein | chr1:1198860-1201301 FORWARD LENGTH=623;>AT1G04430.1 | Symbols: | S-adenosyl-L-methionine-dependent methyltransferases superfamily protein | chr1:1198860	2	8	5	5	5	5	6	7	2	3	3	4	2	3	3	4	16.5	11.9	11.9	70.507	623	623;623	2	3	3	4	1.3003e-24	10.6	11.2	12.7	14.4	484850000	120040000	101790000	114300000	148720000	140960000	98465000	115390000	192760000	0	2	2	4
>AT1G04510.2 | Symbols: MAC3A | MOS4-associated complex 3A | chr1:1226749-1230592 FORWARD LENGTH=523;>AT1G04510.1 | Symbols: MAC3A | MOS4-associated complex 3A | chr1:1226749-1230592 FORWARD LENGTH=523	>AT1G04510.2 | Symbols: MAC3A | MOS4-associated complex 3A | chr1:1226749-1230592 FORWARD LENGTH=523;>AT1G04510.1 | Symbols: MAC3A | MOS4-associated complex 3A | chr1:1226749-1230592 FORWARD LENGTH=523	5;5	3;3	3;3	>AT1G04510.2 | Symbols: MAC3A | MOS4-associated complex 3A | chr1:1226749-1230592 FORWARD LENGTH=523;>AT1G04510.1 | Symbols: MAC3A | MOS4-associated complex 3A | chr1:1226749-1230592 FORWARD LENGTH=523	2	5	3	3	2	1	4	3	1	0	2	2	1	0	2	2	10.9	6.9	6.9	56.881	523	523;523	1		2	2	1.8005e-14	3.6	2.1	9.4	7.5	92039000	0	0	58248000	33791000	0	0	63923000	42456000	0	0	2	1
>AT1G04690.1 | Symbols: KAB1, KV-BETA1 | potassium channel beta subunit 1 | chr1:1313662-1315420 FORWARD LENGTH=328	>AT1G04690.1 | Symbols: KAB1, KV-BETA1 | potassium channel beta subunit 1 | chr1:1313662-1315420 FORWARD LENGTH=328	11	11	11	>AT1G04690.1 | Symbols: KAB1, KV-BETA1 | potassium channel beta subunit 1 | chr1:1313662-1315420 FORWARD LENGTH=328	1	11	11	11	8	7	11	9	8	7	11	9	8	7	11	9	43.6	43.6	43.6	36.538	328	328	13	9	14	11	9.2308e-86	32.6	30.2	43.6	38.1	10811000000	3443300000	3223700000	2265900000	1878600000	3288200000	3502900000	2334300000	2722600000	13	9	12	8
>AT1G04710.1 | Symbols: KAT1, PKT4 | peroxisomal 3-ketoacyl-CoA thiolase 4 | chr1:1321941-1324556 FORWARD LENGTH=443	>AT1G04710.1 | Symbols: KAT1, PKT4 | peroxisomal 3-ketoacyl-CoA thiolase 4 | chr1:1321941-1324556 FORWARD LENGTH=443	4	2	2	>AT1G04710.1 | Symbols: KAT1, PKT4 | peroxisomal 3-ketoacyl-CoA thiolase 4 | chr1:1321941-1324556 FORWARD LENGTH=443	1	4	2	2	4	3	2	3	2	1	1	1	2	1	1	1	14.2	8.1	8.1	46.611	443	443	2	1	1	2	1.4111e-19	14.2	9	5.2	9	69820000	31427000	14066000	11813000	12514000	31427000	0	0	0	3	2	2	1
>AT1G04750.1 | Symbols: VAMP7B, VAMP721, ATVAMP721, AT VAMP7B | vesicle-associated membrane protein 721 | chr1:1331857-1333426 REVERSE LENGTH=219;>AT1G04750.2 | Symbols: VAMP7B, VAMP721, ATVAMP721, AT VAMP7B | vesicle-associated membrane protein 721 | chr1:1331857-1333426 REVERSE LENGTH=181	>AT1G04750.1 | Symbols: VAMP7B, VAMP721, ATVAMP721, AT VAMP7B | vesicle-associated membrane protein 721 | chr1:1331857-1333426 REVERSE LENGTH=219;>AT1G04750.2 | Symbols: VAMP7B, VAMP721, ATVAMP721, AT VAMP7B | vesicle-associated membrane protein 721 | chr1:1331857-1333426 REVERSE LENGTH=181	7;6	7;6	1;1	>AT1G04750.1 | Symbols: VAMP7B, VAMP721, ATVAMP721, AT VAMP7B | vesicle-associated membrane protein 721 | chr1:1331857-1333426 REVERSE LENGTH=219;>AT1G04750.2 | Symbols: VAMP7B, VAMP721, ATVAMP721, AT VAMP7B | vesicle-associated membrane protein 721 | chr1	2	7	7	1	5	5	7	7	5	5	7	7	1	1	1	1	32.9	32.9	4.1	24.765	219	219;181	7	5	8	9	1.6816e-40	25.1	25.1	32.9	32.9	5176700000	1066200000	937540000	1814200000	1358700000	1198200000	1591800000	1625000000	1096100000	9	6	8	11
>AT1G04780.1 | Symbols: | Ankyrin repeat family protein | chr1:1340891-1342965 REVERSE LENGTH=664	>AT1G04780.1 | Symbols: | Ankyrin repeat family protein | chr1:1340891-1342965 REVERSE LENGTH=664	2	2	2	>AT1G04780.1 | Symbols: | Ankyrin repeat family protein | chr1:1340891-1342965 REVERSE LENGTH=664	1	2	2	2	2	2	2	1	2	2	2	1	2	2	2	1	3.5	3.5	3.5	74.359	664	664	2	2	2	1	7.324e-06	3.5	3.5	3.5	1.5	159130000	43450000	63050000	31656000	20976000	46497000	60885000	42205000	0	0	0	2	0
>AT1G04810.1 | Symbols: | 26S proteasome regulatory complex, non-ATPase subcomplex, Rpn2/Psmd1 subunit | chr1:1350304-1355261 FORWARD LENGTH=1001	>AT1G04810.1 | Symbols: | 26S proteasome regulatory complex, non-ATPase subcomplex, Rpn2/Psmd1 subunit | chr1:1350304-1355261 FORWARD LENGTH=1001	17	6	6	>AT1G04810.1 | Symbols: | 26S proteasome regulatory complex, non-ATPase subcomplex, Rpn2/Psmd1 subunit | chr1:1350304-1355261 FORWARD LENGTH=1001	1	17	6	6	12	12	15	13	3	4	6	4	3	4	6	4	22.9	8.6	8.6	108.86	1001	1001	4	6	8	6	6.7181e-149	14.2	14.9	21.6	13.7	1886800000	405100000	640780000	417610000	423270000	547240000	653590000	349990000	476760000	3	3	5	2
>AT1G50010.1 | Symbols: TUA2 | tubulin alpha-2 chain | chr1:18517737-18519729 FORWARD LENGTH=450;>AT1G04820.1 | Symbols: TUA4, TOR2 | tubulin alpha-4 chain | chr1:1356421-1358266 REVERSE LENGTH=450	>AT1G50010.1 | Symbols: TUA2 | tubulin alpha-2 chain | chr1:18517737-18519729 FORWARD LENGTH=450;>AT1G04820.1 | Symbols: TUA4, TOR2 | tubulin alpha-4 chain | chr1:1356421-1358266 REVERSE LENGTH=450	20;20	20;20	1;1	>AT1G50010.1 | Symbols: TUA2 | tubulin alpha-2 chain | chr1:18517737-18519729 FORWARD LENGTH=450;>AT1G04820.1 | Symbols: TUA4, TOR2 | tubulin alpha-4 chain | chr1:1356421-1358266 REVERSE LENGTH=450	2	20	20	1	16	17	20	18	16	17	20	18	1	1	1	1	58.4	58.4	3.1	49.54	450	450;450	51	31	47	40	0	48.2	48.2	58.4	53.1	83575000000	23039000000	18918000000	22982000000	18636000000	18354000000	18991000000	24567000000	25473000000	63	49	65	60
>AT1G04860.1 | Symbols: UBP2, ATUBP2 | ubiquitin-specific protease 2 | chr1:1369306-1372290 REVERSE LENGTH=961	>AT1G04860.1 | Symbols: UBP2, ATUBP2 | ubiquitin-specific protease 2 | chr1:1369306-1372290 REVERSE LENGTH=961	3	3	3	>AT1G04860.1 | Symbols: UBP2, ATUBP2 | ubiquitin-specific protease 2 | chr1:1369306-1372290 REVERSE LENGTH=961	1	3	3	3	2	3	2	2	2	3	2	2	2	3	2	2	4	4	4	105.15	961	961	2	4	3	2	2.9169e-09	2.7	4	2.7	2.7	260030000	45571000	105020000	67922000	41515000	53015000	60251000	56577000	54397000	1	3	2	2
>AT1G04870.1 | Symbols: PRMT10, ATPRMT10 | protein arginine methyltransferase 10 | chr1:1373485-1375128 REVERSE LENGTH=280;>AT1G04870.2 | Symbols: PRMT10, ATPRMT10 | protein arginine methyltransferase 10 | chr1:1373485-1375598 REVERSE LENGTH=383	>AT1G04870.1 | Symbols: PRMT10, ATPRMT10 | protein arginine methyltransferase 10 | chr1:1373485-1375128 REVERSE LENGTH=280;>AT1G04870.2 | Symbols: PRMT10, ATPRMT10 | protein arginine methyltransferase 10 | chr1:1373485-1375598 REVERSE LENGTH=383	6;6	6;6	6;6	>AT1G04870.1 | Symbols: PRMT10, ATPRMT10 | protein arginine methyltransferase 10 | chr1:1373485-1375128 REVERSE LENGTH=280;>AT1G04870.2 | Symbols: PRMT10, ATPRMT10 | protein arginine methyltransferase 10 | chr1:1373485-1375598 REVERSE LENGTH=383	2	6	6	6	5	5	5	5	5	5	5	5	5	5	5	5	38.9	38.9	38.9	32.074	280	280;383	8	10	5	6	3.957e-58	32.5	30.4	30.7	30.4	2010000000	591880000	687280000	375140000	355710000	503850000	590410000	543860000	427720000	9	5	3	5
>AT1G04900.1 | Symbols: | Protein of unknown function (DUF185) | chr1:1383912-1387561 FORWARD LENGTH=442	>AT1G04900.1 | Symbols: | Protein of unknown function (DUF185) | chr1:1383912-1387561 FORWARD LENGTH=442	2	2	2	>AT1G04900.1 | Symbols: | Protein of unknown function (DUF185) | chr1:1383912-1387561 FORWARD LENGTH=442	1	2	2	2	2	1	2	2	2	1	2	2	2	1	2	2	5.7	5.7	5.7	50.604	442	442	2	1	2	2	3.8138e-07	5.7	2.3	5.7	5.7	133400000	27466000	26567000	39897000	39472000	29250000	0	38439000	53153000	0	1	1	2
>AT1G04910.1 | Symbols: | O-fucosyltransferase family protein | chr1:1388101-1391074 REVERSE LENGTH=519	>AT1G04910.1 | Symbols: | O-fucosyltransferase family protein | chr1:1388101-1391074 REVERSE LENGTH=519	2	2	2	>AT1G04910.1 | Symbols: | O-fucosyltransferase family protein | chr1:1388101-1391074 REVERSE LENGTH=519	1	2	2	2	1	1	2	2	1	1	2	2	1	1	2	2	4.8	4.8	4.8	59.042	519	519	1	1	2	2	5.293e-24	2.3	2.3	4.8	4.8	246880000	55285000	41295000	83320000	66977000	0	0	0	84139000	1	1	1	0
>AT1G04970.1 | Symbols: | lipid-binding serum glycoprotein family protein | chr1:1411216-1413431 FORWARD LENGTH=488;>AT1G04970.2 | Symbols: | lipid-binding serum glycoprotein family protein | chr1:1411924-1413431 FORWARD LENGTH=349	>AT1G04970.1 | Symbols: | lipid-binding serum glycoprotein family protein | chr1:1411216-1413431 FORWARD LENGTH=488;>AT1G04970.2 | Symbols: | lipid-binding serum glycoprotein family protein | chr1:1411924-1413431 FORWARD LENGTH=349	5;4	5;4	5;4	>AT1G04970.1 | Symbols: | lipid-binding serum glycoprotein family protein | chr1:1411216-1413431 FORWARD LENGTH=488;>AT1G04970.2 | Symbols: | lipid-binding serum glycoprotein family protein | chr1:1411924-1413431 FORWARD LENGTH=349	2	5	5	5	5	4	4	3	5	4	4	3	5	4	4	3	10	10	10	53.493	488	488;349	5	4	4	3	1.2585e-20	10	10	8.4	6.1	767580000	290210000	227620000	173200000	76560000	237160000	242650000	171510000	182900000	4	2	1	1
>AT1G04980.1 | Symbols: ATPDIL2-2, ATPDI10, PDI10, PDIL2-2 | PDI-like 2-2 | chr1:1413869-1416120 REVERSE LENGTH=447	>AT1G04980.1 | Symbols: ATPDIL2-2, ATPDI10, PDI10, PDIL2-2 | PDI-like 2-2 | chr1:1413869-1416120 REVERSE LENGTH=447	1	1	1	>AT1G04980.1 | Symbols: ATPDIL2-2, ATPDI10, PDI10, PDIL2-2 | PDI-like 2-2 | chr1:1413869-1416120 REVERSE LENGTH=447	1	1	1	1	1	1	1	1	1	1	1	1	1	1	1	1	2.9	2.9	2.9	48.403	447	447	1	1	1	1	5.0251e-11	2.9	2.9	2.9	2.9	104800000	24376000	16837000	43599000	19992000	0	0	0	25115000	0	0	1	1
>AT1G05010.1 | Symbols: EFE, ACO4, EAT1 | ethylene-forming enzyme | chr1:1431419-1432695 REVERSE LENGTH=323	>AT1G05010.1 | Symbols: EFE, ACO4, EAT1 | ethylene-forming enzyme | chr1:1431419-1432695 REVERSE LENGTH=323	5	5	5	>AT1G05010.1 | Symbols: EFE, ACO4, EAT1 | ethylene-forming enzyme | chr1:1431419-1432695 REVERSE LENGTH=323	1	5	5	5	4	2	4	5	4	2	4	5	4	2	4	5	21.1	21.1	21.1	36.676	323	323	5	4	5	7	3.4183e-37	16.7	9	17.6	21.1	816970000	244070000	239190000	148520000	185190000	234120000	189330000	211470000	192970000	5	3	2	3
>AT1G05180.1 | Symbols: AXR1 | NAD(P)-binding Rossmann-fold superfamily protein | chr1:1498357-1501775 REVERSE LENGTH=540;>AT1G05180.3 | Symbols: AXR1 | NAD(P)-binding Rossmann-fold superfamily protein | chr1:1498524-1501469 REVERSE LENGTH=422;>AT1G05180.2 | Symbols: AXR1 | NAD(P)-binding Rossmann-fold superfamily protein | chr1:1498357-1501469 REVERSE LENGTH=436	>AT1G05180.1 | Symbols: AXR1 | NAD(P)-binding Rossmann-fold superfamily protein | chr1:1498357-1501775 REVERSE LENGTH=540;>AT1G05180.3 | Symbols: AXR1 | NAD(P)-binding Rossmann-fold superfamily protein | chr1:1498524-1501469 REVERSE LENGTH=422;>AT1G05180.2 | Symbols: AXR1 | NAD(P)-binding Rossmann-fold superfamily protein | chr1:1498357-1501469 REVERSE LENGTH=436	5;4;4	5;4;4	5;4;4	>AT1G05180.1 | Symbols: AXR1 | NAD(P)-binding Rossmann-fold superfamily protein | chr1:1498357-1501775 REVERSE LENGTH=540;>AT1G05180.3 | Symbols: AXR1 | NAD(P)-binding Rossmann-fold superfamily protein | chr1:1498524-1501469 REVERSE LENGTH=422;>AT1G05180.2	3	5	5	5	4	4	3	4	4	4	3	4	4	4	3	4	16.7	16.7	16.7	60.034	540	540;422;436	4	5	3	4	1.277e-32	13.7	13.7	7.6	13.5	870600000	289600000	304660000	126140000	150190000	302160000	248460000	182630000	216960000	3	3	3	3
>AT1G05250.1 | Symbols: | Peroxidase superfamily protein | chr1:1525924-1527169 REVERSE LENGTH=325;>AT1G05240.1 | Symbols: | Peroxidase superfamily protein | chr1:1521202-1522447 FORWARD LENGTH=325	>AT1G05250.1 | Symbols: | Peroxidase superfamily protein | chr1:1525924-1527169 REVERSE LENGTH=325;>AT1G05240.1 | Symbols: | Peroxidase superfamily protein | chr1:1521202-1522447 FORWARD LENGTH=325	4;4	3;3	3;3	>AT1G05250.1 | Symbols: | Peroxidase superfamily protein | chr1:1525924-1527169 REVERSE LENGTH=325;>AT1G05240.1 | Symbols: | Peroxidase superfamily protein | chr1:1521202-1522447 FORWARD LENGTH=325	2	4	3	3	3	3	4	4	3	3	3	3	3	3	3	3	15.7	12.9	12.9	35.624	325	325;325	3	3	3	4	1.4272e-14	12.9	12.9	15.7	15.7	678400000	261750000	174520000	102600000	139530000	210700000	202060000	137510000	148370000	2	2	2	2
>AT1G05260.1 | Symbols: RCI3, RCI3A | Peroxidase superfamily protein | chr1:1529827-1531271 FORWARD LENGTH=326	>AT1G05260.1 | Symbols: RCI3, RCI3A | Peroxidase superfamily protein | chr1:1529827-1531271 FORWARD LENGTH=326	10	10	9	>AT1G05260.1 | Symbols: RCI3, RCI3A | Peroxidase superfamily protein | chr1:1529827-1531271 FORWARD LENGTH=326	1	10	10	9	7	6	9	9	7	6	9	9	7	6	8	8	50	50	47.2	34.905	326	326	9	8	12	10	3.0547e-123	33.7	28.8	45.1	46.9	5316000000	1668000000	1258200000	1221400000	1168400000	1552000000	1598200000	1278500000	1421500000	9	5	10	9
>AT1G05270.1 | Symbols: | TraB family protein | chr1:1531806-1534305 REVERSE LENGTH=371	>AT1G05270.1 | Symbols: | TraB family protein | chr1:1531806-1534305 REVERSE LENGTH=371	7	7	7	>AT1G05270.1 | Symbols: | TraB family protein | chr1:1531806-1534305 REVERSE LENGTH=371	1	7	7	7	5	5	4	6	5	5	4	6	5	5	4	6	24.5	24.5	24.5	40.741	371	371	5	6	5	6	3.9726e-24	17.3	18.3	14	21.8	649560000	182290000	236820000	125700000	104740000	204670000	165890000	132290000	143000000	4	2	3	1
>AT1G05350.1 | Symbols: | NAD(P)-binding Rossmann-fold superfamily protein | chr1:1560891-1564005 REVERSE LENGTH=431	>AT1G05350.1 | Symbols: | NAD(P)-binding Rossmann-fold superfamily protein | chr1:1560891-1564005 REVERSE LENGTH=431	5	5	5	>AT1G05350.1 | Symbols: | NAD(P)-binding Rossmann-fold superfamily protein | chr1:1560891-1564005 REVERSE LENGTH=431	1	5	5	5	4	4	5	4	4	4	5	4	4	4	5	4	13	13	13	47.02	431	431	4	5	5	4	7.5977e-42	9.7	9.7	13	10.4	1655000000	416910000	483450000	450860000	303750000	444960000	473370000	381860000	402630000	4	2	3	2
>AT1G05500.1 | Symbols: SYTE, ATSYTE, NTMC2TYPE2.1, NTMC2T2.1, SYT5 | Calcium-dependent lipid-binding (CaLB domain) family protein | chr1:1625098-1628940 FORWARD LENGTH=560	>AT1G05500.1 | Symbols: SYTE, ATSYTE, NTMC2TYPE2.1, NTMC2T2.1, SYT5 | Calcium-dependent lipid-binding (CaLB domain) family protein | chr1:1625098-1628940 FORWARD LENGTH=560	7	7	7	>AT1G05500.1 | Symbols: SYTE, ATSYTE, NTMC2TYPE2.1, NTMC2T2.1, SYT5 | Calcium-dependent lipid-binding (CaLB domain) family protein | chr1:1625098-1628940 FORWARD LENGTH=560	1	7	7	7	5	6	6	6	5	6	6	6	5	6	6	6	19.1	19.1	19.1	62.928	560	560	6	7	7	7	5.3023e-46	14.3	15.5	17.3	15.5	3876100000	1135800000	749740000	1037600000	953030000	1248300000	913800000	990030000	1168600000	9	10	7	7
>AT1G05520.1 | Symbols: | Sec23/Sec24 protein transport family protein | chr1:1631126-1635703 REVERSE LENGTH=783	>AT1G05520.1 | Symbols: | Sec23/Sec24 protein transport family protein | chr1:1631126-1635703 REVERSE LENGTH=783	13	13	10	>AT1G05520.1 | Symbols: | Sec23/Sec24 protein transport family protein | chr1:1631126-1635703 REVERSE LENGTH=783	1	13	13	10	6	9	10	7	6	9	10	7	5	8	7	4	26.2	26.2	21.1	86.356	783	783	7	11	12	11	9.1739e-67	8.7	19.3	20.6	14.4	2745900000	306800000	332330000	1065100000	1041700000	673360000	541730000	769460000	681910000	5	6	11	6
>AT1G05560.1 | Symbols: UGT1, UGT75B1 | UDP-glucosyltransferase 75B1 | chr1:1645674-1647083 REVERSE LENGTH=469	>AT1G05560.1 | Symbols: UGT1, UGT75B1 | UDP-glucosyltransferase 75B1 | chr1:1645674-1647083 REVERSE LENGTH=469	7	7	7	>AT1G05560.1 | Symbols: UGT1, UGT75B1 | UDP-glucosyltransferase 75B1 | chr1:1645674-1647083 REVERSE LENGTH=469	1	7	7	7	6	6	4	5	6	6	4	5	6	6	4	5	15.1	15.1	15.1	52.813	469	469	6	6	4	6	1.4937e-65	12.4	14.5	10.2	10.9	1729500000	609140000	472200000	264720000	383440000	523340000	562960000	375490000	382010000	6	6	2	3
>AT1G05620.2 | Symbols: URH2 | uridine-ribohydrolase 2 | chr1:1679609-1681527 FORWARD LENGTH=302;>AT1G05620.1 | Symbols: URH2 | uridine-ribohydrolase 2 | chr1:1679286-1681527 FORWARD LENGTH=322	>AT1G05620.2 | Symbols: URH2 | uridine-ribohydrolase 2 | chr1:1679609-1681527 FORWARD LENGTH=302;>AT1G05620.1 | Symbols: URH2 | uridine-ribohydrolase 2 | chr1:1679286-1681527 FORWARD LENGTH=322	3;3	3;3	3;3	>AT1G05620.2 | Symbols: URH2 | uridine-ribohydrolase 2 | chr1:1679609-1681527 FORWARD LENGTH=302;>AT1G05620.1 | Symbols: URH2 | uridine-ribohydrolase 2 | chr1:1679286-1681527 FORWARD LENGTH=322	2	3	3	3	2	2	3	2	2	2	3	2	2	2	3	2	10.9	10.9	10.9	32.528	302	302;322	2	2	3	2	3.5869e-08	7.3	7.3	10.9	7.3	518960000	110590000	150160000	140360000	117840000	131110000	148910000	139880000	162820000	1	1	3	1
>AT1G05680.1 | Symbols: UGT74E2 | Uridine diphosphate glycosyltransferase 74E2 | chr1:1703196-1704639 REVERSE LENGTH=453;>AT1G05675.1 | Symbols: | UDP-Glycosyltransferase superfamily protein | chr1:1701213-1702715 REVERSE LENGTH=453	>AT1G05680.1 | Symbols: UGT74E2 | Uridine diphosphate glycosyltransferase 74E2 | chr1:1703196-1704639 REVERSE LENGTH=453;>AT1G05675.1 | Symbols: | UDP-Glycosyltransferase superfamily protein | chr1:1701213-1702715 REVERSE LENGTH=453	2;1	2;1	2;1	>AT1G05680.1 | Symbols: UGT74E2 | Uridine diphosphate glycosyltransferase 74E2 | chr1:1703196-1704639 REVERSE LENGTH=453;>AT1G05675.1 | Symbols: | UDP-Glycosyltransferase superfamily protein | chr1:1701213-1702715 REVERSE LENGTH=453	2	2	2	2	1	2	1	2	1	2	1	2	1	2	1	2	5.7	5.7	5.7	51.05	453	453;453	1	3	1	2	6.2761e-23	2.4	5.7	3.3	5.7	227760000	37052000	56805000	23298000	110600000	0	57760000	0	145510000	1	1	0	1
>AT1G05910.1 | Symbols: | cell division cycle protein 48-related / CDC48-related | chr1:1790796-1796503 FORWARD LENGTH=1210	>AT1G05910.1 | Symbols: | cell division cycle protein 48-related / CDC48-related | chr1:1790796-1796503 FORWARD LENGTH=1210	1	1	1	>AT1G05910.1 | Symbols: | cell division cycle protein 48-related / CDC48-related | chr1:1790796-1796503 FORWARD LENGTH=1210	1	1	1	1	1	1	1	0	1	1	1	0	1	1	1	0	2.6	2.6	2.6	133.78	1210	1210	1	1	1		3.4078e-06	2.6	2.6	2.6	0	43198000	17340000	21560000	4298400	0	0	0	4717700	0	1	1	0	0
>AT1G05940.1 | Symbols: CAT9 | cationic amino acid transporter 9 | chr1:1801365-1803942 REVERSE LENGTH=569	>AT1G05940.1 | Symbols: CAT9 | cationic amino acid transporter 9 | chr1:1801365-1803942 REVERSE LENGTH=569	2	2	2	>AT1G05940.1 | Symbols: CAT9 | cationic amino acid transporter 9 | chr1:1801365-1803942 REVERSE LENGTH=569	1	2	2	2	2	2	2	1	2	2	2	1	2	2	2	1	3.9	3.9	3.9	60.176	569	569	2	2	2	1	5.1641e-11	3.9	3.9	3.9	1.8	181090000	67382000	63243000	34416000	16052000	70176000	61436000	45155000	0	2	1	0	0
>AT1G05960.1 | Symbols: | ARM repeat superfamily protein | chr1:1808478-1815060 REVERSE LENGTH=982;>AT1G05960.2 | Symbols: | ARM repeat superfamily protein | chr1:1808478-1815060 REVERSE LENGTH=1003	>AT1G05960.1 | Symbols: | ARM repeat superfamily protein | chr1:1808478-1815060 REVERSE LENGTH=982;>AT1G05960.2 | Symbols: | ARM repeat superfamily protein | chr1:1808478-1815060 REVERSE LENGTH=1003	3;3	3;3	3;3	>AT1G05960.1 | Symbols: | ARM repeat superfamily protein | chr1:1808478-1815060 REVERSE LENGTH=982;>AT1G05960.2 | Symbols: | ARM repeat superfamily protein | chr1:1808478-1815060 REVERSE LENGTH=1003	2	3	3	3	2	2	3	3	2	2	3	3	2	2	3	3	4.5	4.5	4.5	108.94	982	982;1003	2	2	3	3	1.4202e-05	3.2	3.2	4.5	4.5	248920000	70341000	51235000	62608000	64733000	72428000	0	78454000	69494000	1	0	1	1
>AT1G06000.1 | Symbols: | UDP-Glycosyltransferase superfamily protein | chr1:1820495-1821802 REVERSE LENGTH=435	>AT1G06000.1 | Symbols: | UDP-Glycosyltransferase superfamily protein | chr1:1820495-1821802 REVERSE LENGTH=435	6	6	6	>AT1G06000.1 | Symbols: | UDP-Glycosyltransferase superfamily protein | chr1:1820495-1821802 REVERSE LENGTH=435	1	6	6	6	6	6	6	6	6	6	6	6	6	6	6	6	17.9	17.9	17.9	48.122	435	435	9	8	9	7	5.832e-54	17.9	17.9	17.9	17.9	3159700000	1033500000	913900000	801510000	410750000	802510000	842350000	843700000	625990000	8	7	8	5
>AT1G06060.1 | Symbols: | LisH and RanBPM domains containing protein | chr1:1833071-1834516 FORWARD LENGTH=213	>AT1G06060.1 | Symbols: | LisH and RanBPM domains containing protein | chr1:1833071-1834516 FORWARD LENGTH=213	1	1	1	>AT1G06060.1 | Symbols: | LisH and RanBPM domains containing protein | chr1:1833071-1834516 FORWARD LENGTH=213	1	1	1	1	1	1	1	1	1	1	1	1	1	1	1	1	7	7	7	24.556	213	213	1	1	1	1	8.6652e-09	7	7	7	7	155850000	38097000	37550000	31457000	48743000	0	0	0	61233000	1	1	1	1
>AT1G06130.2 | Symbols: GLX2-4 | glyoxalase 2-4 | chr1:1858034-1860640 REVERSE LENGTH=330;>AT1G06130.1 | Symbols: GLX2-4 | glyoxalase 2-4 | chr1:1858034-1860640 REVERSE LENGTH=331	>AT1G06130.2 | Symbols: GLX2-4 | glyoxalase 2-4 | chr1:1858034-1860640 REVERSE LENGTH=330;>AT1G06130.1 | Symbols: GLX2-4 | glyoxalase 2-4 | chr1:1858034-1860640 REVERSE LENGTH=331	6;6	6;6	6;6	>AT1G06130.2 | Symbols: GLX2-4 | glyoxalase 2-4 | chr1:1858034-1860640 REVERSE LENGTH=330;>AT1G06130.1 | Symbols: GLX2-4 | glyoxalase 2-4 | chr1:1858034-1860640 REVERSE LENGTH=331	2	6	6	6	3	4	5	6	3	4	5	6	3	4	5	6	23.3	23.3	23.3	36.496	330	330;331	3	4	5	6	7.2171e-32	12.7	15.5	20	23.3	1049000000	289570000	288110000	229750000	241530000	399630000	259480000	258420000	253870000	4	2	5	3
>AT1G06200.1 | Symbols: | Peptidase S24/S26A/S26B/S26C family protein | chr1:1894604-1896852 REVERSE LENGTH=206	>AT1G06200.1 | Symbols: | Peptidase S24/S26A/S26B/S26C family protein | chr1:1894604-1896852 REVERSE LENGTH=206	2	2	2	>AT1G06200.1 | Symbols: | Peptidase S24/S26A/S26B/S26C family protein | chr1:1894604-1896852 REVERSE LENGTH=206	1	2	2	2	2	0	1	0	2	0	1	0	2	0	1	0	14.1	14.1	14.1	23.249	206	206	2		1		3.4609e-09	14.1	0	6.3	0	35714000	23618000	0	12096000	0	0	0	13276000	0	1	0	1	0
>AT1G06210.1 | Symbols: | ENTH/VHS/GAT family protein | chr1:1897567-1898986 FORWARD LENGTH=383	>AT1G06210.1 | Symbols: | ENTH/VHS/GAT family protein | chr1:1897567-1898986 FORWARD LENGTH=383	1	1	1	>AT1G06210.1 | Symbols: | ENTH/VHS/GAT family protein | chr1:1897567-1898986 FORWARD LENGTH=383	1	1	1	1	1	1	1	0	1	1	1	0	1	1	1	0	4.4	4.4	4.4	42.797	383	383	1	1	1		8.0845e-19	4.4	4.4	4.4	0	115890000	62404000	39860000	13630000	0	0	0	14959000	0	1	0	0	0
>AT1G06220.2 | Symbols: MEE5 | Ribosomal protein S5/Elongation factor G/III/V family protein | chr1:1900524-1904583 FORWARD LENGTH=987;>AT1G06220.1 | Symbols: MEE5, CLO, GFA1 | Ribosomal protein S5/Elongation factor G/III/V family protein | chr1:1900524-1904583 FORWARD LENGTH=987;>AT5G25230.1 | Symbols: | Ribosomal protein S5/Elongation factor G/III/V family protein | chr5:8739709-8743594 FORWARD…	>AT1G06220.2 | Symbols: MEE5 | Ribosomal protein S5/Elongation factor G/III/V family protein | chr1:1900524-1904583 FORWARD LENGTH=987;>AT1G06220.1 | Symbols: MEE5, CLO, GFA1 | Ribosomal protein S5/Elongation factor G/III/V family protein | chr1:1900524-1904583 FORWARD LENGTH=987;>AT5G25230.1 | Symbols: | Ribosomal protein S5/Elongation factor G/III/V family protein | chr5:8739709-8743594 FORWARD…	24;24;18	24;24;18	24;24;18	>AT1G06220.2 | Symbols: MEE5 | Ribosomal protein S5/Elongation factor G/III/V family protein | chr1:1900524-1904583 FORWARD LENGTH=987;>AT1G06220.1 | Symbols: MEE5, CLO, GFA1 | Ribosomal protein S5/Elongation factor G/III/V family protein | chr1:1900524-19	3	24	24	24	11	15	17	19	11	15	17	19	11	15	17	19	34.1	34.1	34.1	110.44	987	987;987;973	15	19	19	24	1.365e-91	14.9	22.2	23.9	27.7	4599800000	1366000000	1256000000	1024600000	953170000	1268800000	1276600000	1179800000	1241700000	10	8	16	13
>AT1G06290.1 | Symbols: ACX3, ATACX3 | acyl-CoA oxidase 3 | chr1:1922423-1926002 FORWARD LENGTH=675;>AT3G06690.1 | Symbols: | acyl-CoA oxidases;oxidoreductases, acting on the CH-CH group of donors;FAD binding;oxidoreductases;acyl-CoA oxidases | chr3:2115589-2116825 REVERSE LENGTH=187	>AT1G06290.1 | Symbols: ACX3, ATACX3 | acyl-CoA oxidase 3 | chr1:1922423-1926002 FORWARD LENGTH=675	17;3	17;3	13;2	>AT1G06290.1 | Symbols: ACX3, ATACX3 | acyl-CoA oxidase 3 | chr1:1922423-1926002 FORWARD LENGTH=675	2	17	17	13	10	8	16	15	10	8	16	15	8	7	13	12	30.4	30.4	24.3	75.675	675	675;187	11	8	19	17	4.471e-219	17.2	13.9	29.3	27	5968500000	1451100000	957670000	2068100000	1491700000	1589600000	1653600000	1642600000	1542700000	9	6	19	14
>AT1G06310.1 | Symbols: ACX6 | acyl-CoA oxidase 6 | chr1:1926802-1930227 FORWARD LENGTH=675	>AT1G06310.1 | Symbols: ACX6 | acyl-CoA oxidase 6 | chr1:1926802-1930227 FORWARD LENGTH=675	5	1	1	>AT1G06310.1 | Symbols: ACX6 | acyl-CoA oxidase 6 | chr1:1926802-1930227 FORWARD LENGTH=675	1	5	1	1	2	2	3	4	0	1	0	1	0	1	0	1	7.3	1.2	1.2	75.899	675	675		1		1	6.1697e-23	3	3.1	5	6.2	1659200000	0	1112800000	0	546390000	0	0	0	686400000	0	1	0	1
>AT1G06400.1 | Symbols: ARA2, ATRABA1A, ATRAB11E, ARA-2 | Ras-related small GTP-binding family protein | chr1:1951089-1952686 REVERSE LENGTH=216	>AT1G06400.1 | Symbols: ARA2, ATRABA1A, ATRAB11E, ARA-2 | Ras-related small GTP-binding family protein | chr1:1951089-1952686 REVERSE LENGTH=216	6	5	5	>AT1G06400.1 | Symbols: ARA2, ATRABA1A, ATRAB11E, ARA-2 | Ras-related small GTP-binding family protein | chr1:1951089-1952686 REVERSE LENGTH=216	1	6	5	5	2	4	6	6	1	3	5	5	1	3	5	5	37.5	33.8	33.8	23.927	216	216	2	4	6	6	1.2284e-19	13.4	19.4	37.5	37.5	2816400000	637860000	651680000	830260000	696560000	820710000	762590000	823170000	755590000	2	3	4	4
>AT1G06410.1 | Symbols: ATTPS7, TPS7, ATTPSA | trehalose-phosphatase/synthase 7 | chr1:1955413-1958153 FORWARD LENGTH=851	>AT1G06410.1 | Symbols: ATTPS7, TPS7, ATTPSA | trehalose-phosphatase/synthase 7 | chr1:1955413-1958153 FORWARD LENGTH=851	17	17	14	>AT1G06410.1 | Symbols: ATTPS7, TPS7, ATTPSA | trehalose-phosphatase/synthase 7 | chr1:1955413-1958153 FORWARD LENGTH=851	1	17	17	14	12	12	13	14	12	12	13	14	10	10	11	12	27.1	27.1	23.1	96.687	851	851	13	13	14	15	3.0121e-96	19	19	22.2	23.9	3583900000	951940000	845710000	837380000	948850000	904220000	861050000	1145900000	1109400000	8	8	11	11
>AT1G06430.1 | Symbols: FTSH8 | FTSH protease 8 | chr1:1960214-1962525 REVERSE LENGTH=685;>AT2G30950.1 | Symbols: VAR2, FTSH2 | FtsH extracellular protease family | chr2:13174692-13177064 FORWARD LENGTH=695;>AT3G02450.1 | Symbols: | cell division protein ftsH, putative | chr3:502876-505030 REVERSE LENGTH=622	>AT1G06430.1 | Symbols: FTSH8 | FTSH protease 8 | chr1:1960214-1962525 REVERSE LENGTH=685;>AT2G30950.1 | Symbols: VAR2, FTSH2 | FtsH extracellular protease family | chr2:13174692-13177064 FORWARD LENGTH=695	6;5;1	5;5;0	5;5;0	>AT1G06430.1 | Symbols: FTSH8 | FTSH protease 8 | chr1:1960214-1962525 REVERSE LENGTH=685;>AT2G30950.1 | Symbols: VAR2, FTSH2 | FtsH extracellular protease family | chr2:13174692-13177064 FORWARD LENGTH=695	3	6	5	5	4	4	6	5	3	3	5	4	3	3	5	4	13.1	11.4	11.4	73.198	685	685;695;622	3	3	5	5	8.2615e-50	8.3	9.2	13.1	11.7	700690000	181870000	201630000	138080000	179120000	186010000	284680000	123310000	192750000	2	3	3	5
>AT1G06530.1 | Symbols: | Tropomyosin-related | chr1:2001625-2002596 FORWARD LENGTH=323	>AT1G06530.1 | Symbols: | Tropomyosin-related | chr1:2001625-2002596 FORWARD LENGTH=323	9	9	9	>AT1G06530.1 | Symbols: | Tropomyosin-related | chr1:2001625-2002596 FORWARD LENGTH=323	1	9	9	9	7	6	7	7	7	6	7	7	7	6	7	7	32.5	32.5	32.5	36.119	323	323	8	6	7	7	1.5886e-53	26	21.7	24.8	26.9	2524800000	855770000	772630000	494740000	401640000	762480000	870840000	536910000	527630000	4	6	4	4
>AT1G06550.1 | Symbols: | ATP-dependent caseinolytic (Clp) protease/crotonase family protein | chr1:2003834-2006564 REVERSE LENGTH=387	>AT1G06550.1 | Symbols: | ATP-dependent caseinolytic (Clp) protease/crotonase family protein | chr1:2003834-2006564 REVERSE LENGTH=387	14	14	14	>AT1G06550.1 | Symbols: | ATP-dependent caseinolytic (Clp) protease/crotonase family protein | chr1:2003834-2006564 REVERSE LENGTH=387	1	14	14	14	11	8	12	12	11	8	12	12	11	8	12	12	38.5	38.5	38.5	43.257	387	387	14	9	14	14	2.2066e-93	34.4	24	38.5	36.7	4724900000	1427700000	1002600000	1283900000	1010700000	1226600000	1410400000	1291800000	1224000000	12	6	13	10
>AT1G06620.1 | Symbols: | 2-oxoglutarate (2OG) and Fe(II)-dependent oxygenase superfamily protein | chr1:2025618-2027094 FORWARD LENGTH=365	>AT1G06620.1 | Symbols: | 2-oxoglutarate (2OG) and Fe(II)-dependent oxygenase superfamily protein | chr1:2025618-2027094 FORWARD LENGTH=365	2	2	2	>AT1G06620.1 | Symbols: | 2-oxoglutarate (2OG) and Fe(II)-dependent oxygenase superfamily protein | chr1:2025618-2027094 FORWARD LENGTH=365	1	2	2	2	1	1	1	0	1	1	1	0	1	1	1	0	5.8	5.8	5.8	40.351	365	365	1	1	1		4.8994e-07	3.3	3.3	2.5	0	238890000	97484000	79147000	62262000	0	0	89621000	0	0	1	0	1	0
>AT1G06640.3 | Symbols: | 2-oxoglutarate (2OG) and Fe(II)-dependent oxygenase superfamily protein | chr1:2032366-2033527 FORWARD LENGTH=286;>AT1G06640.2 | Symbols: | 2-oxoglutarate (2OG) and Fe(II)-dependent oxygenase superfamily protein | chr1:2032366-2033505 FORWARD LENGTH=322;>AT1G06640.1 | Symbols: | 2-oxoglutarate (2OG) and Fe(II)-dependent oxygenase superfamily protein | chr1:2032366-203377…	>AT1G06640.3 | Symbols: | 2-oxoglutarate (2OG) and Fe(II)-dependent oxygenase superfamily protein | chr1:2032366-2033527 FORWARD LENGTH=286;>AT1G06640.2 | Symbols: | 2-oxoglutarate (2OG) and Fe(II)-dependent oxygenase superfamily protein | chr1:2032366-2033505 FORWARD LENGTH=322;>AT1G06640.1 | Symbols: | 2-oxoglutarate (2OG) and Fe(II)-dependent oxygenase superfamily protein | chr1:2032366-203377…	2;2;2;1;1;1	2;2;2;1;1;1	2;2;2;1;1;1	>AT1G06640.3 | Symbols: | 2-oxoglutarate (2OG) and Fe(II)-dependent oxygenase superfamily protein | chr1:2032366-2033527 FORWARD LENGTH=286;>AT1G06640.2 | Symbols: | 2-oxoglutarate (2OG) and Fe(II)-dependent oxygenase superfamily protein | chr1:2032366-2	6	2	2	2	1	0	2	2	1	0	2	2	1	0	2	2	7	7	7	32.289	286	286;322;369;314;366;369	2		2	2	2.2923e-05	3.5	0	7	7	342510000	66525000	0	52297000	223690000	66525000	0	0	0	1	0	1	2
>AT1G06680.2 | Symbols: PSBP-1, OEE2, PSII-P | photosystem II subunit P-1 | chr1:2048076-2049186 FORWARD LENGTH=219;>AT1G06680.1 | Symbols: PSBP-1, OEE2, PSII-P, OE23 | photosystem II subunit P-1 | chr1:2047940-2049186 FORWARD LENGTH=263	>AT1G06680.2 | Symbols: PSBP-1, OEE2, PSII-P | photosystem II subunit P-1 | chr1:2048076-2049186 FORWARD LENGTH=219;>AT1G06680.1 | Symbols: PSBP-1, OEE2, PSII-P, OE23 | photosystem II subunit P-1 | chr1:2047940-2049186 FORWARD LENGTH=263	1;1	1;1	1;1	>AT1G06680.2 | Symbols: PSBP-1, OEE2, PSII-P | photosystem II subunit P-1 | chr1:2048076-2049186 FORWARD LENGTH=219;>AT1G06680.1 | Symbols: PSBP-1, OEE2, PSII-P, OE23 | photosystem II subunit P-1 | chr1:2047940-2049186 FORWARD LENGTH=263	2	1	1	1	1	1	1	1	1	1	1	1	1	1	1	1	9.6	9.6	9.6	23.759	219	219;263	2	1	1	1	0.002606	9.6	9.6	9.6	9.6	386210000	140820000	68799000	29905000	146680000	140820000	0	0	0	1	0	1	0
>AT1G06700.2 | Symbols: | Protein kinase superfamily protein | chr1:2052750-2054552 REVERSE LENGTH=361;>AT1G06700.1 | Symbols: | Protein kinase superfamily protein | chr1:2052750-2054552 REVERSE LENGTH=361	>AT1G06700.2 | Symbols: | Protein kinase superfamily protein | chr1:2052750-2054552 REVERSE LENGTH=361;>AT1G06700.1 | Symbols: | Protein kinase superfamily protein | chr1:2052750-2054552 REVERSE LENGTH=361	6;6	2;2	2;2	>AT1G06700.2 | Symbols: | Protein kinase superfamily protein | chr1:2052750-2054552 REVERSE LENGTH=361;>AT1G06700.1 | Symbols: | Protein kinase superfamily protein | chr1:2052750-2054552 REVERSE LENGTH=361	2	6	2	2	4	5	5	5	2	2	2	2	2	2	2	2	22.7	8.9	8.9	39.819	361	361;361	2	2	2	2	1.4385e-55	16.9	19.4	20.2	20.2	889170000	298060000	204560000	192000000	194550000	321450000	208540000	213980000	240850000	2	2	2	1
>AT1G06760.1 | Symbols: | winged-helix DNA-binding transcription factor family protein | chr1:2076687-2077616 REVERSE LENGTH=274	>AT1G06760.1 | Symbols: | winged-helix DNA-binding transcription factor family protein | chr1:2076687-2077616 REVERSE LENGTH=274	2	1	1	>AT1G06760.1 | Symbols: | winged-helix DNA-binding transcription factor family protein | chr1:2076687-2077616 REVERSE LENGTH=274	1	2	1	1	1	1	1	2	1	1	1	1	1	1	1	1	7.3	4.7	4.7	28.946	274	274	2	2	2	1	2.1271e-06	4.7	4.7	4.7	7.3	255320000	79992000	74005000	67198000	34125000	0	0	0	42869000	1	1	1	1
>AT1G06780.1 | Symbols: GAUT6 | galacturonosyltransferase 6 | chr1:2083689-2086853 FORWARD LENGTH=589;>AT1G06780.2 | Symbols: GAUT6 | galacturonosyltransferase 6 | chr1:2083689-2086853 FORWARD LENGTH=602	>AT1G06780.1 | Symbols: GAUT6 | galacturonosyltransferase 6 | chr1:2083689-2086853 FORWARD LENGTH=589;>AT1G06780.2 | Symbols: GAUT6 | galacturonosyltransferase 6 | chr1:2083689-2086853 FORWARD LENGTH=602	1;1	1;1	1;1	>AT1G06780.1 | Symbols: GAUT6 | galacturonosyltransferase 6 | chr1:2083689-2086853 FORWARD LENGTH=589;>AT1G06780.2 | Symbols: GAUT6 | galacturonosyltransferase 6 | chr1:2083689-2086853 FORWARD LENGTH=602	2	1	1	1	1	0	0	1	1	0	0	1	1	0	0	1	1.5	1.5	1.5	67.536	589	589;602	1			1	0.00029252	1.5	0	0	1.5	17487000	10371000	0	0	7115700	0	0	0	8939100	1	0	0	0
>AT1G06840.1 | Symbols: | Leucine-rich repeat protein kinase family protein | chr1:2097854-2103208 REVERSE LENGTH=953;>AT5G54590.2 | Symbols: CRLK1 | Protein kinase superfamily protein | chr5:22180480-22182698 FORWARD LENGTH=440;>AT5G49470.1 | Symbols: | PAS domain-containing protein tyrosine kinase family protein | chr5:20064669-20068311 FORWARD LENGTH=483;>AT1G25390.1 | Symbols: | Protein kinas…	>AT1G06840.1 | Symbols: | Leucine-rich repeat protein kinase family protein | chr1:2097854-2103208 REVERSE LENGTH=953	10;1;1;1;1;1;1;1;1;1;1;1;1;1;1;1;1;1;1	10;1;1;1;1;1;1;1;1;1;1;1;1;1;1;1;1;1;1	8;0;0;0;0;0;0;0;0;0;0;0;0;0;0;0;0;0;0	>AT1G06840.1 | Symbols: | Leucine-rich repeat protein kinase family protein | chr1:2097854-2103208 REVERSE LENGTH=953	19	10	10	8	6	6	7	7	6	6	7	7	6	6	6	5	12.3	12.3	10.5	105.62	953	953;440;483;629;639;671;686;708;708;730;738;744;765;770;773;783;831;951;1296	7	8	7	8	3.5406e-27	8.6	7.6	8.6	8.5	1407200000	363590000	379870000	274750000	389000000	443950000	454350000	301090000	297610000	5	7	4	4
>AT1G06900.1 | Symbols: | Insulinase (Peptidase family M16) family protein | chr1:2115155-2120635 REVERSE LENGTH=1024	>AT1G06900.1 | Symbols: | Insulinase (Peptidase family M16) family protein | chr1:2115155-2120635 REVERSE LENGTH=1024	8	8	8	>AT1G06900.1 | Symbols: | Insulinase (Peptidase family M16) family protein | chr1:2115155-2120635 REVERSE LENGTH=1024	1	8	8	8	5	6	6	7	5	6	6	7	5	6	6	7	11.7	11.7	11.7	117.17	1024	1024	5	6	6	8	4.4596e-42	8.1	9.2	9.2	10.6	781940000	160260000	173380000	229360000	218940000	151930000	160910000	292560000	245370000	4	3	5	5
>AT1G06950.1 | Symbols: ATTIC110, TIC110 | translocon at the inner envelope membrane of chloroplasts 110 | chr1:2130303-2135563 REVERSE LENGTH=1016	>AT1G06950.1 | Symbols: ATTIC110, TIC110 | translocon at the inner envelope membrane of chloroplasts 110 | chr1:2130303-2135563 REVERSE LENGTH=1016	24	24	24	>AT1G06950.1 | Symbols: ATTIC110, TIC110 | translocon at the inner envelope membrane of chloroplasts 110 | chr1:2130303-2135563 REVERSE LENGTH=1016	1	24	24	24	18	16	18	17	18	16	18	17	18	16	18	17	28.4	28.4	28.4	112.12	1016	1016	20	18	20	18	8.1664e-141	21.3	18.7	22.4	20.8	5278900000	1823900000	1512700000	1164600000	777720000	1749500000	1464500000	1244000000	1190900000	14	8	15	14
>AT1G07000.1 | Symbols: ATEXO70B2, EXO70B2 | exocyst subunit exo70 family protein B2 | chr1:2150398-2152305 REVERSE LENGTH=599	>AT1G07000.1 | Symbols: ATEXO70B2, EXO70B2 | exocyst subunit exo70 family protein B2 | chr1:2150398-2152305 REVERSE LENGTH=599	2	2	2	>AT1G07000.1 | Symbols: ATEXO70B2, EXO70B2 | exocyst subunit exo70 family protein B2 | chr1:2150398-2152305 REVERSE LENGTH=599	1	2	2	2	0	2	0	0	0	2	0	0	0	2	0	0	4	4	4	67.714	599	599		2			8.6075e-08	0	4	0	0	22349000	0	22349000	0	0	0	25306000	0	0	0	1	0	0
>AT1G07040.1 | Symbols: | unknown protein; INVOLVED IN: biological_process unknown; LOCATED IN: chloroplast; EXPRESSED IN: 24 plant structures; EXPRESSED DURING: 14 growth stages; BEST Arabidopsis thaliana protein match is: unknown protein (TAIR:AT1G27030.1); Has 540 Blast hits to 538 proteins in 187 species: Archae - 0; Bacteria - 333; Metazoa - 0; Fungi - 0; Plants - 67; Viruses - 0; Other Euka…	>AT1G07040.1 | Symbols: | unknown protein; INVOLVED IN: biological_process unknown; LOCATED IN: chloroplast; EXPRESSED IN: 24 plant structures; EXPRESSED DURING: 14 growth stages; BEST Arabidopsis thaliana protein match is: unknown protein (TAIR:AT1G27030.1); Has 540 Blast hits to 538 proteins in 187 species: Archae - 0; Bacteria - 333; Metazoa - 0; Fungi - 0; Plants - 67; Viruses - 0; Other Euka…	6	6	6	>AT1G07040.1 | Symbols: | unknown protein; INVOLVED IN: biological_process unknown; LOCATED IN: chloroplast; EXPRESSED IN: 24 plant structures; EXPRESSED DURING: 14 growth stages; BEST Arabidopsis thaliana protein match is: unknown protein (TAIR:AT1G27030	1	6	6	6	3	4	5	5	3	4	5	5	3	4	5	5	27.2	27.2	27.2	40.637	371	371	3	4	7	5	5.519e-33	10.8	14.8	22.1	21.8	964590000	170480000	235970000	350910000	207210000	221650000	268870000	304330000	226670000	2	1	5	3
>AT1G16910.1 | Symbols: LSH8 | Protein of unknown function (DUF640) | chr1:5785373-5785867 FORWARD LENGTH=164;>AT2G42610.2 | Symbols: LSH10 | Protein of unknown function (DUF640) | chr2:17748005-17748538 FORWARD LENGTH=177;>AT2G42610.1 | Symbols: LSH10 | Protein of unknown function (DUF640) | chr2:17748005-17748538 FORWARD LENGTH=177;>AT5G58500.1 | Symbols: LSH5 | Protein of unknown function (DUF…	>AT1G16910.1 | Symbols: LSH8 | Protein of unknown function (DUF640) | chr1:5785373-5785867 FORWARD LENGTH=164;>AT2G42610.2 | Symbols: LSH10 | Protein of unknown function (DUF640) | chr2:17748005-17748538 FORWARD LENGTH=177;>AT2G42610.1 | Symbols: LSH10 | Protein of unknown function (DUF640) | chr2:17748005-17748538 FORWARD LENGTH=177;>AT5G58500.1 | Symbols: LSH5 | Protein of unknown function (DUF…	1;1;1;1;1;1;1;1;1;1;1	1;1;1;1;1;1;1;1;1;1;1	1;1;1;1;1;1;1;1;1;1;1	>AT1G16910.1 | Symbols: LSH8 | Protein of unknown function (DUF640) | chr1:5785373-5785867 FORWARD LENGTH=164;>AT2G42610.2 | Symbols: LSH10 | Protein of unknown function (DUF640) | chr2:17748005-17748538 FORWARD LENGTH=177;>AT2G42610.1 | Symbols: LSH10 | P	11	1	1	1	1	0	1	1	1	0	1	1	1	0	1	1	7.3	7.3	7.3	18.524	164	164;177;177;182;190;191;195;195;196;201;219	2		1	1	0.0029171	7.3	0	7.3	7.3	98045000	29908000	0	39288000	28848000	0	0	0	36240000	1	0	0	1
>AT1G07110.1 | Symbols: F2KP, ATF2KP, FKFBP | fructose-2,6-bisphosphatase | chr1:2178363-2183980 REVERSE LENGTH=744	>AT1G07110.1 | Symbols: F2KP, ATF2KP, FKFBP | fructose-2,6-bisphosphatase | chr1:2178363-2183980 REVERSE LENGTH=744	2	2	2	>AT1G07110.1 | Symbols: F2KP, ATF2KP, FKFBP | fructose-2,6-bisphosphatase | chr1:2178363-2183980 REVERSE LENGTH=744	1	2	2	2	0	0	1	2	0	0	1	2	0	0	1	2	3.4	3.4	3.4	82.558	744	744			2	2	1.5426e-05	0	0	1.3	3.4	1497100000	0	0	22446000	1474600000	0	0	0	1852500000	0	0	1	2
>AT1G07140.1 | Symbols: SIRANBP | Pleckstrin homology (PH) domain superfamily protein | chr1:2192360-2193688 REVERSE LENGTH=228	>AT1G07140.1 | Symbols: SIRANBP | Pleckstrin homology (PH) domain superfamily protein | chr1:2192360-2193688 REVERSE LENGTH=228	4	4	3	>AT1G07140.1 | Symbols: SIRANBP | Pleckstrin homology (PH) domain superfamily protein | chr1:2192360-2193688 REVERSE LENGTH=228	1	4	4	3	2	3	4	3	2	3	4	3	1	2	3	2	23.7	23.7	17.1	25.601	228	228	3	4	5	4	8.9021e-29	12.3	17.1	23.7	18.9	1972000000	409690000	811560000	514850000	235890000	400690000	889790000	483620000	415950000	3	3	4	2
>AT1G07240.1 | Symbols: UGT71C5 | UDP-glucosyl transferase 71C5 | chr1:2223889-2225331 FORWARD LENGTH=480	>AT1G07240.1 | Symbols: UGT71C5 | UDP-glucosyl transferase 71C5 | chr1:2223889-2225331 FORWARD LENGTH=480	7	7	7	>AT1G07240.1 | Symbols: UGT71C5 | UDP-glucosyl transferase 71C5 | chr1:2223889-2225331 FORWARD LENGTH=480	1	7	7	7	5	6	6	7	5	6	6	7	5	6	6	7	24.6	24.6	24.6	52.646	480	480	7	10	6	7	1.3002e-31	16.5	19.8	19.8	24.6	1325400000	362350000	377180000	255370000	330450000	393670000	372480000	323750000	332610000	9	4	4	4
>AT1G07250.1 | Symbols: UGT71C4 | UDP-glucosyl transferase 71C4 | chr1:2225963-2227402 FORWARD LENGTH=479	>AT1G07250.1 | Symbols: UGT71C4 | UDP-glucosyl transferase 71C4 | chr1:2225963-2227402 FORWARD LENGTH=479	6	6	6	>AT1G07250.1 | Symbols: UGT71C4 | UDP-glucosyl transferase 71C4 | chr1:2225963-2227402 FORWARD LENGTH=479	1	6	6	6	2	5	2	2	2	5	2	2	2	5	2	2	19	19	19	52.843	479	479	2	5	2	2	8.3971e-17	4.8	16.5	4.4	6.3	321600000	42126000	189480000	34039000	55949000	0	183810000	0	101040000	0	4	1	1
>AT1G07260.1 | Symbols: UGT71C3 | UDP-glucosyl transferase 71C3 | chr1:2227748-2229178 REVERSE LENGTH=476	>AT1G07260.1 | Symbols: UGT71C3 | UDP-glucosyl transferase 71C3 | chr1:2227748-2229178 REVERSE LENGTH=476	5	5	5	>AT1G07260.1 | Symbols: UGT71C3 | UDP-glucosyl transferase 71C3 | chr1:2227748-2229178 REVERSE LENGTH=476	1	5	5	5	4	3	4	3	4	3	4	3	4	3	4	3	16.8	16.8	16.8	52.901	476	476	6	4	6	4	5.8776e-25	13.4	10.5	13.9	10.9	895930000	439610000	155200000	203520000	97597000	195940000	234250000	229200000	284820000	5	3	5	3
>AT1G07310.1 | Symbols: | Calcium-dependent lipid-binding (CaLB domain) family protein | chr1:2247775-2248833 REVERSE LENGTH=352	>AT1G07310.1 | Symbols: | Calcium-dependent lipid-binding (CaLB domain) family protein | chr1:2247775-2248833 REVERSE LENGTH=352	1	1	1	>AT1G07310.1 | Symbols: | Calcium-dependent lipid-binding (CaLB domain) family protein | chr1:2247775-2248833 REVERSE LENGTH=352	1	1	1	1	0	1	1	1	0	1	1	1	0	1	1	1	4	4	4	39.013	352	352		1	1	1	0.0059494	0	4	4	4	38294000	0	11271000	16780000	10243000	0	0	0	12868000	0	0	1	0
>AT1G07370.1 | Symbols: PCNA1, ATPCNA1 | proliferating cellular nuclear antigen 1 | chr1:2263204-2264382 FORWARD LENGTH=263	>AT1G07370.1 | Symbols: PCNA1, ATPCNA1 | proliferating cellular nuclear antigen 1 | chr1:2263204-2264382 FORWARD LENGTH=263	6	1	1	>AT1G07370.1 | Symbols: PCNA1, ATPCNA1 | proliferating cellular nuclear antigen 1 | chr1:2263204-2264382 FORWARD LENGTH=263	1	6	1	1	6	6	5	6	1	1	1	1	1	1	1	1	31.2	6.5	6.5	29.122	263	263	1	1	1	1	6.4175e-36	31.2	31.2	28.1	31.2	184850000	40199000	50605000	47408000	46641000	0	0	0	58593000	0	1	1	1
>AT1G07380.1 | Symbols: | Neutral/alkaline non-lysosomal ceramidase | chr1:2264829-2268306 REVERSE LENGTH=779;>AT5G58980.1 | Symbols: | Neutral/alkaline non-lysosomal ceramidase | chr5:23811449-23814395 REVERSE LENGTH=733;>AT2G38010.1 | Symbols: | Neutral/alkaline non-lysosomal ceramidase | chr2:15906862-15909867 FORWARD LENGTH=757;>AT2G38010.2 | Symbols: | Neutral/alkaline non-lysosomal ceramida…	>AT1G07380.1 | Symbols: | Neutral/alkaline non-lysosomal ceramidase | chr1:2264829-2268306 REVERSE LENGTH=779;>AT5G58980.1 | Symbols: | Neutral/alkaline non-lysosomal ceramidase | chr5:23811449-23814395 REVERSE LENGTH=733;>AT2G38010.1 | Symbols: | Neutral/alkaline non-lysosomal ceramidase | chr2:15906862-15909867 FORWARD LENGTH=757;>AT2G38010.2 | Symbols: | Neutral/alkaline non-lysosomal ceramida…	2;1;1;1	2;1;1;1	2;1;1;1	>AT1G07380.1 | Symbols: | Neutral/alkaline non-lysosomal ceramidase | chr1:2264829-2268306 REVERSE LENGTH=779;>AT5G58980.1 | Symbols: | Neutral/alkaline non-lysosomal ceramidase | chr5:23811449-23814395 REVERSE LENGTH=733;>AT2G38010.1 | Symbols: | Neutr	4	2	2	2	2	2	1	1	2	2	1	1	2	2	1	1	4.1	4.1	4.1	86.77	779	779;733;757;792	2	2	1	1	1.8724e-11	4.1	4.1	1.5	1.5	110370000	55201000	29487000	16583000	9101100	56199000	32392000	0	0	1	2	0	1
>AT1G07510.1 | Symbols: ftsh10 | FTSH protease 10 | chr1:2305689-2309380 FORWARD LENGTH=813	>AT1G07510.1 | Symbols: ftsh10 | FTSH protease 10 | chr1:2305689-2309380 FORWARD LENGTH=813	6	1	1	>AT1G07510.1 | Symbols: ftsh10 | FTSH protease 10 | chr1:2305689-2309380 FORWARD LENGTH=813	1	6	1	1	3	2	6	5	0	1	1	0	0	1	1	0	11.6	1.4	1.4	89.554	813	813		1	1		8.5973e-31	5.3	2.8	11.6	10.2	85565000	0	56494000	29070000	0	0	0	31906000	0	0	1	0	0
>AT1G07530.1 | Symbols: SCL14, ATGRAS2, GRAS2 | SCARECROW-like 14 | chr1:2313828-2316137 REVERSE LENGTH=769	>AT1G07530.1 | Symbols: SCL14, ATGRAS2, GRAS2 | SCARECROW-like 14 | chr1:2313828-2316137 REVERSE LENGTH=769	1	1	1	>AT1G07530.1 | Symbols: SCL14, ATGRAS2, GRAS2 | SCARECROW-like 14 | chr1:2313828-2316137 REVERSE LENGTH=769	1	1	1	1	1	0	0	0	1	0	0	0	1	0	0	0	1.7	1.7	1.7	85.928	769	769	1				4.7128e-05	1.7	0	0	0	0	0	0	0	0	0	0	0	0	0	0	0	0
>AT5G59970.1 | Symbols: | Histone superfamily protein | chr5:24146352-24146663 REVERSE LENGTH=103;>AT5G59690.1 | Symbols: | Histone superfamily protein | chr5:24051649-24051960 FORWARD LENGTH=103;>AT3G53730.1 | Symbols: | Histone superfamily protein | chr3:19912659-19912970 REVERSE LENGTH=103;>AT3G46320.1 | Symbols: | Histone superfamily protein | chr3:17020043-17020354 REVERSE LENGTH=103;>AT3G45…	>AT5G59970.1 | Symbols: | Histone superfamily protein | chr5:24146352-24146663 REVERSE LENGTH=103;>AT5G59690.1 | Symbols: | Histone superfamily protein | chr5:24051649-24051960 FORWARD LENGTH=103;>AT3G53730.1 | Symbols: | Histone superfamily protein | chr3:19912659-19912970 REVERSE LENGTH=103;>AT3G46320.1 | Symbols: | Histone superfamily protein | chr3:17020043-17020354 REVERSE LENGTH=103;>AT3G45…	7;7;7;7;7;7;7;7;7;6	7;7;7;7;7;7;7;7;7;6	7;7;7;7;7;7;7;7;7;6	>AT5G59970.1 | Symbols: | Histone superfamily protein | chr5:24146352-24146663 REVERSE LENGTH=103;>AT5G59690.1 | Symbols: | Histone superfamily protein | chr5:24051649-24051960 FORWARD LENGTH=103;>AT3G53730.1 | Symbols: | Histone superfamily protein | c	10	7	7	7	7	6	7	7	7	6	7	7	7	6	7	7	52.4	52.4	52.4	11.409	103	103;103;103;103;103;103;103;103;103;86	17	11	17	18	3.9816e-109	52.4	51.5	52.4	52.4	62860000000	24190000000	18444000000	10626000000	9599900000	22161000000	21708000000	11535000000	11639000000	24	17	23	14
>AT1G07670.1 | Symbols: ATECA4, ECA4 | endomembrane-type CA-ATPase 4 | chr1:2370305-2374196 REVERSE LENGTH=1061	>AT1G07670.1 | Symbols: ATECA4, ECA4 | endomembrane-type CA-ATPase 4 | chr1:2370305-2374196 REVERSE LENGTH=1061	19	6	6	>AT1G07670.1 | Symbols: ATECA4, ECA4 | endomembrane-type CA-ATPase 4 | chr1:2370305-2374196 REVERSE LENGTH=1061	1	19	6	6	17	16	16	15	6	5	5	4	6	5	5	4	22.6	8.4	8.4	116.18	1061	1061	9	5	6	5	7.2814e-192	20.5	19	20.1	17.1	1299200000	340780000	242730000	407470000	308220000	202770000	283160000	489130000	474980000	3	4	3	4
>AT1G07750.1 | Symbols: | RmlC-like cupins superfamily protein | chr1:2404300-2405863 REVERSE LENGTH=356;>AT2G28680.1 | Symbols: | RmlC-like cupins superfamily protein | chr2:12303118-12304747 REVERSE LENGTH=356	>AT1G07750.1 | Symbols: | RmlC-like cupins superfamily protein | chr1:2404300-2405863 REVERSE LENGTH=356	8;2	8;2	8;2	>AT1G07750.1 | Symbols: | RmlC-like cupins superfamily protein | chr1:2404300-2405863 REVERSE LENGTH=356	2	8	8	8	8	6	7	5	8	6	7	5	8	6	7	5	29.5	29.5	29.5	38.31	356	356;356	10	7	8	5	8.2181e-48	29.5	21.3	27.2	18	3989800000	1256800000	962800000	993950000	776200000	1177800000	1139200000	1042100000	1042300000	12	8	9	7
>AT5G59850.1 | Symbols: | Ribosomal protein S8 family protein | chr5:24112499-24113084 REVERSE LENGTH=130;>AT1G07770.2 | Symbols: RPS15A | ribosomal protein S15A | chr1:2408413-2409065 REVERSE LENGTH=130;>AT1G07770.1 | Symbols: RPS15A | ribosomal protein S15A | chr1:2408413-2409065 REVERSE LENGTH=130;>AT2G39590.1 | Symbols: | Ribosomal protein S8 family protein | chr2:16517588-16518265 REVERSE LE…	>AT5G59850.1 | Symbols: | Ribosomal protein S8 family protein | chr5:24112499-24113084 REVERSE LENGTH=130;>AT1G07770.2 | Symbols: RPS15A | ribosomal protein S15A | chr1:2408413-2409065 REVERSE LENGTH=130;>AT1G07770.1 | Symbols: RPS15A | ribosomal protein S15A | chr1:2408413-2409065 REVERSE LENGTH=130	5;5;5;2	5;5;5;2	2;2;2;1	>AT5G59850.1 | Symbols: | Ribosomal protein S8 family protein | chr5:24112499-24113084 REVERSE LENGTH=130;>AT1G07770.2 | Symbols: RPS15A | ribosomal protein S15A | chr1:2408413-2409065 REVERSE LENGTH=130;>AT1G07770.1 | Symbols: RPS15A | ribosomal protein	4	5	5	2	5	3	5	5	5	3	5	5	2	1	2	2	45.4	45.4	22.3	14.804	130	130;130;130;136	7	5	12	11	3.0487e-39	45.4	19.2	45.4	45.4	24015000000	7019900000	5036700000	7085800000	4872800000	3761100000	5964000000	8989800000	7638600000	6	3	12	13
>AT1G07810.1 | Symbols: ECA1, ATECA1, ACA3 | ER-type Ca2+-ATPase 1 | chr1:2416681-2420572 FORWARD LENGTH=1061	>AT1G07810.1 | Symbols: ECA1, ATECA1, ACA3 | ER-type Ca2+-ATPase 1 | chr1:2416681-2420572 FORWARD LENGTH=1061	19	19	6	>AT1G07810.1 | Symbols: ECA1, ATECA1, ACA3 | ER-type Ca2+-ATPase 1 | chr1:2416681-2420572 FORWARD LENGTH=1061	1	19	19	6	17	16	15	15	17	16	15	15	6	5	4	4	21.4	21.4	7.2	116.36	1061	1061	18	17	17	16	2.4352e-166	19.2	17.8	17.2	14.9	7820900000	2719300000	2136300000	1632500000	1332800000	2367600000	2313000000	1881100000	1770900000	15	17	12	14
>AT1G07830.1 | Symbols: | ribosomal protein L29 family protein | chr1:2422549-2423392 FORWARD LENGTH=144	>AT1G07830.1 | Symbols: | ribosomal protein L29 family protein | chr1:2422549-2423392 FORWARD LENGTH=144	3	3	3	>AT1G07830.1 | Symbols: | ribosomal protein L29 family protein | chr1:2422549-2423392 FORWARD LENGTH=144	1	3	3	3	2	0	1	2	2	0	1	2	2	0	1	2	28.5	28.5	28.5	16.886	144	144	3		1	2	1.6273e-33	18.8	0	9.7	18.1	141550000	75445000	0	26096000	40013000	0	0	0	50266000	1	0	1	1
>AT1G07840.3 | Symbols: | Sas10/Utp3/C1D family | chr1:2424603-2426131 FORWARD LENGTH=279;>AT1G07840.2 | Symbols: | Sas10/Utp3/C1D family | chr1:2424603-2426425 FORWARD LENGTH=312;>AT1G07840.1 | Symbols: | Sas10/Utp3/C1D family | chr1:2424603-2426425 FORWARD LENGTH=312	>AT1G07840.3 | Symbols: | Sas10/Utp3/C1D family | chr1:2424603-2426131 FORWARD LENGTH=279;>AT1G07840.2 | Symbols: | Sas10/Utp3/C1D family | chr1:2424603-2426425 FORWARD LENGTH=312;>AT1G07840.1 | Symbols: | Sas10/Utp3/C1D family | chr1:2424603-2426425 FORWARD LENGTH=312	1;1;1	1;1;1	1;1;1	>AT1G07840.3 | Symbols: | Sas10/Utp3/C1D family | chr1:2424603-2426131 FORWARD LENGTH=279;>AT1G07840.2 | Symbols: | Sas10/Utp3/C1D family | chr1:2424603-2426425 FORWARD LENGTH=312;>AT1G07840.1 | Symbols: | Sas10/Utp3/C1D family | chr1:2424603-2426425 FO	3	1	1	1	1	1	0	0	1	1	0	0	1	1	0	0	5.7	5.7	5.7	31.995	279	279;312;312	1	1			0.0020125	5.7	5.7	0	0	39029000	14574000	24455000	0	0	0	27691000	0	0	1	1	0	0
>AT1G07870.1 | Symbols: | Protein kinase superfamily protein | chr1:2429933-2431843 REVERSE LENGTH=423;>AT1G07870.2 | Symbols: | Protein kinase superfamily protein | chr1:2428942-2431843 REVERSE LENGTH=538	>AT1G07870.1 | Symbols: | Protein kinase superfamily protein | chr1:2429933-2431843 REVERSE LENGTH=423;>AT1G07870.2 | Symbols: | Protein kinase superfamily protein | chr1:2428942-2431843 REVERSE LENGTH=538	1;1	1;1	1;1	>AT1G07870.1 | Symbols: | Protein kinase superfamily protein | chr1:2429933-2431843 REVERSE LENGTH=423;>AT1G07870.2 | Symbols: | Protein kinase superfamily protein | chr1:2428942-2431843 REVERSE LENGTH=538	2	1	1	1	1	1	1	0	1	1	1	0	1	1	1	0	3.1	3.1	3.1	46.763	423	423;538	1	1	1		1.3334e-12	3.1	3.1	3.1	0	111830000	41538000	34497000	35797000	0	0	0	39288000	0	1	1	0	0
>AT1G07890.6 | Symbols: APX1, MEE6, CS1, ATAPX1, ATAPX01 | ascorbate peroxidase 1 | chr1:2438005-2439349 FORWARD LENGTH=249;>AT1G07890.8 | Symbols: APX1, MEE6, CS1, ATAPX1, ATAPX01 | ascorbate peroxidase 1 | chr1:2438005-2439435 FORWARD LENGTH=250;>AT1G07890.7 | Symbols: APX1, MEE6, CS1, ATAPX1, ATAPX01 | ascorbate peroxidase 1 | chr1:2438005-2439435 FORWARD LENGTH=250;>AT1G07890.5 | Symbols: APX…	>AT1G07890.6 | Symbols: APX1, MEE6, CS1, ATAPX1, ATAPX01 | ascorbate peroxidase 1 | chr1:2438005-2439349 FORWARD LENGTH=249;>AT1G07890.8 | Symbols: APX1, MEE6, CS1, ATAPX1, ATAPX01 | ascorbate peroxidase 1 | chr1:2438005-2439435 FORWARD LENGTH=250;>AT1G07890.7 | Symbols: APX1, MEE6, CS1, ATAPX1, ATAPX01 | ascorbate peroxidase 1 | chr1:2438005-2439435 FORWARD LENGTH=250;>AT1G07890.5 | Symbols: APX…	15;15;15;15;15;15;15;15	15;15;15;15;15;15;15;15	14;14;14;14;14;14;14;14	>AT1G07890.6 | Symbols: APX1, MEE6, CS1, ATAPX1, ATAPX01 | ascorbate peroxidase 1 | chr1:2438005-2439349 FORWARD LENGTH=249;>AT1G07890.8 | Symbols: APX1, MEE6, CS1, ATAPX1, ATAPX01 | ascorbate peroxidase 1 | chr1:2438005-2439435 FORWARD LENGTH=250;>AT1G078	8	15	15	14	15	15	15	15	15	15	15	15	14	14	14	14	64.3	64.3	64.3	27.52	249	249;250;250;250;250;250;250;250	28	27	27	28	2.8417e-145	64.3	64.3	64.3	64.3	41459000000	10393000000	8557200000	12261000000	10248000000	9543400000	9385300000	13363000000	13391000000	30	22	36	37
>AT5G60390.3 | Symbols: | GTP binding Elongation factor Tu family protein | chr5:24289226-24290675 FORWARD LENGTH=449;>AT5G60390.1 | Symbols: | GTP binding Elongation factor Tu family protein | chr5:24289226-24290675 FORWARD LENGTH=449;>AT1G07940.2 | Symbols: | GTP binding Elongation factor Tu family protein | chr1:2463350-2464792 REVERSE LENGTH=449;>AT1G07940.1 | Symbols: | GTP binding Elongatio…	>AT5G60390.3 | Symbols: | GTP binding Elongation factor Tu family protein | chr5:24289226-24290675 FORWARD LENGTH=449;>AT5G60390.1 | Symbols: | GTP binding Elongation factor Tu family protein | chr5:24289226-24290675 FORWARD LENGTH=449;>AT1G07940.2 | Symbols: | GTP binding Elongation factor Tu family protein | chr1:2463350-2464792 REVERSE LENGTH=449;>AT1G07940.1 | Symbols: | GTP binding Elongatio…	24;24;24;24;24;24;21;17	24;24;24;24;24;24;21;17	24;24;24;24;24;24;21;17	>AT5G60390.3 | Symbols: | GTP binding Elongation factor Tu family protein | chr5:24289226-24290675 FORWARD LENGTH=449;>AT5G60390.1 | Symbols: | GTP binding Elongation factor Tu family protein | chr5:24289226-24290675 FORWARD LENGTH=449;>AT1G07940.2 | Sym	8	24	24	24	17	19	21	22	17	19	21	22	17	19	21	22	62.1	62.1	62.1	49.502	449	449;449;449;449;449;449;400;372	69	48	79	91	1.5691e-201	40.8	46.3	55	51.7	273340000000	72519000000	71524000000	65547000000	63752000000	74379000000	74919000000	68841000000	63041000000	83	62	102	110
>AT1G07990.1 | Symbols: | SIT4 phosphatase-associated family protein | chr1:2477413-2482898 FORWARD LENGTH=802	>AT1G07990.1 | Symbols: | SIT4 phosphatase-associated family protein | chr1:2477413-2482898 FORWARD LENGTH=802	5	5	4	>AT1G07990.1 | Symbols: | SIT4 phosphatase-associated family protein | chr1:2477413-2482898 FORWARD LENGTH=802	1	5	5	4	5	5	4	2	5	5	4	2	4	4	3	2	9.2	9.2	8.2	89.588	802	802	5	5	4	2	2.825e-19	9.2	9.2	6.5	4	946580000	475000000	222780000	153500000	95305000	310560000	297900000	202640000	204360000	6	1	1	2
>AT2G28310.3 | Symbols: | Protein of unknown function (DUF707) | chr2:12085773-12087888 FORWARD LENGTH=374;>AT2G28310.2 | Symbols: | Protein of unknown function (DUF707) | chr2:12085773-12087888 FORWARD LENGTH=374;>AT2G28310.1 | Symbols: | Protein of unknown function (DUF707) | chr2:12085773-12087888 FORWARD LENGTH=374;>AT1G08040.2 | Symbols: | Protein of unknown function (DUF707) | chr1:2495507-…	>AT2G28310.3 | Symbols: | Protein of unknown function (DUF707) | chr2:12085773-12087888 FORWARD LENGTH=374;>AT2G28310.2 | Symbols: | Protein of unknown function (DUF707) | chr2:12085773-12087888 FORWARD LENGTH=374;>AT2G28310.1 | Symbols: | Protein of unknown function (DUF707) | chr2:12085773-12087888 FORWARD LENGTH=374;>AT1G08040.2 | Symbols: | Protein of unknown function (DUF707) | chr1:2495507-…	1;1;1;1;1	1;1;1;1;1	1;1;1;1;1	>AT2G28310.3 | Symbols: | Protein of unknown function (DUF707) | chr2:12085773-12087888 FORWARD LENGTH=374;>AT2G28310.2 | Symbols: | Protein of unknown function (DUF707) | chr2:12085773-12087888 FORWARD LENGTH=374;>AT2G28310.1 | Symbols: | Protein of un	5	1	1	1	1	0	1	1	1	0	1	1	1	0	1	1	2.9	2.9	2.9	43.181	374	374;374;374;382;382	1		1	1	0.0025868	2.9	0	2.9	2.9	40968000	18589000	0	11821000	10558000	0	0	0	13264000	0	0	1	1
>AT1G08110.3 | Symbols: | lactoylglutathione lyase family protein / glyoxalase I family protein | chr1:2535702-2537630 FORWARD LENGTH=185;>AT1G08110.2 | Symbols: | lactoylglutathione lyase family protein / glyoxalase I family protein | chr1:2535702-2537630 FORWARD LENGTH=185;>AT1G08110.1 | Symbols: | lactoylglutathione lyase family protein / glyoxalase I family protein | chr1:2535702-2537630 FORW…	>AT1G08110.3 | Symbols: | lactoylglutathione lyase family protein / glyoxalase I family protein | chr1:2535702-2537630 FORWARD LENGTH=185;>AT1G08110.2 | Symbols: | lactoylglutathione lyase family protein / glyoxalase I family protein | chr1:2535702-2537630 FORWARD LENGTH=185;>AT1G08110.1 | Symbols: | lactoylglutathione lyase family protein / glyoxalase I family protein | chr1:2535702-2537630 FORW…	3;3;3;3	3;3;3;3	3;3;3;3	>AT1G08110.3 | Symbols: | lactoylglutathione lyase family protein / glyoxalase I family protein | chr1:2535702-2537630 FORWARD LENGTH=185;>AT1G08110.2 | Symbols: | lactoylglutathione lyase family protein / glyoxalase I family protein | chr1:2535702-25376	4	3	3	3	2	1	3	2	2	1	3	2	2	1	3	2	29.2	29.2	29.2	20.848	185	185;185;185;235	2	1	3	2	2.5512e-12	15.1	9.7	29.2	23.8	365890000	112720000	79337000	107210000	66629000	94806000	0	115490000	103800000	0	0	3	1
>AT1G08130.1 | Symbols: ATLIG1, LIG1 | DNA ligase 1 | chr1:2542913-2547815 REVERSE LENGTH=790	>AT1G08130.1 | Symbols: ATLIG1, LIG1 | DNA ligase 1 | chr1:2542913-2547815 REVERSE LENGTH=790	2	2	2	>AT1G08130.1 | Symbols: ATLIG1, LIG1 | DNA ligase 1 | chr1:2542913-2547815 REVERSE LENGTH=790	1	2	2	2	1	1	1	1	1	1	1	1	1	1	1	1	3.9	3.9	3.9	87.739	790	790	1	1	1	1	0.00047031	1.3	2.7	2.7	2.7	55992000	22199000	9520300	12361000	11912000	22199000	0	0	0	1	1	0	0
>AT1G08160.1 | Symbols: | Late embryogenesis abundant (LEA) hydroxyproline-rich glycoprotein family | chr1:2559672-2560337 REVERSE LENGTH=221	>AT1G08160.1 | Symbols: | Late embryogenesis abundant (LEA) hydroxyproline-rich glycoprotein family | chr1:2559672-2560337 REVERSE LENGTH=221	4	4	4	>AT1G08160.1 | Symbols: | Late embryogenesis abundant (LEA) hydroxyproline-rich glycoprotein family | chr1:2559672-2560337 REVERSE LENGTH=221	1	4	4	4	4	4	4	4	4	4	4	4	4	4	4	4	17.2	17.2	17.2	25.158	221	221	5	5	6	6	1.5531e-41	17.2	17.2	17.2	17.2	6713600000	2244200000	1511800000	1623000000	1334600000	2271300000	1704400000	1785300000	1653000000	3	4	5	5
>AT1G08190.1 | Symbols: ATVPS41, ZIP2, VPS41, ATVAM2, VAM2 | vacuolar protein sorting 41 | chr1:2567652-2573142 FORWARD LENGTH=980	>AT1G08190.1 | Symbols: ATVPS41, ZIP2, VPS41, ATVAM2, VAM2 | vacuolar protein sorting 41 | chr1:2567652-2573142 FORWARD LENGTH=980	7	7	7	>AT1G08190.1 | Symbols: ATVPS41, ZIP2, VPS41, ATVAM2, VAM2 | vacuolar protein sorting 41 | chr1:2567652-2573142 FORWARD LENGTH=980	1	7	7	7	7	7	6	7	7	7	6	7	7	7	6	7	10.3	10.3	10.3	110.28	980	980	7	8	7	8	1.7022e-45	10.3	10.3	9.1	10.3	1555700000	428420000	376320000	379980000	370970000	430470000	431030000	457730000	391060000	5	6	6	5
>AT1G08200.1 | Symbols: AXS2 | UDP-D-apiose/UDP-D-xylose synthase 2 | chr1:2574259-2576609 REVERSE LENGTH=389	>AT1G08200.1 | Symbols: AXS2 | UDP-D-apiose/UDP-D-xylose synthase 2 | chr1:2574259-2576609 REVERSE LENGTH=389	16	16	6	>AT1G08200.1 | Symbols: AXS2 | UDP-D-apiose/UDP-D-xylose synthase 2 | chr1:2574259-2576609 REVERSE LENGTH=389	1	16	16	6	13	12	15	15	13	12	15	15	4	4	6	6	54.8	54.8	21.1	43.79	389	389	21	17	23	24	3.1312e-179	44.5	41.9	50.1	50.1	17246000000	4090100000	3838000000	5097800000	4220000000	3612600000	4922900000	5164800000	5306000000	19	19	25	24
>AT1G08220.2 | Symbols: | FUNCTIONS IN: molecular_function unknown; INVOLVED IN: mitochondrial proton-transporting ATP synthase complex assembly; LOCATED IN: mitochondrial inner membrane; EXPRESSED IN: 18 plant structures; EXPRESSED DURING: 7 growth stages; CONTAINS InterPro DOMAIN/s: ATPase assembly factor ATP10, mitochondria (InterPro:IPR007849); Has 152 Blast hits to 152 proteins in 76 species…	>AT1G08220.2 | Symbols: | FUNCTIONS IN: molecular_function unknown; INVOLVED IN: mitochondrial proton-transporting ATP synthase complex assembly; LOCATED IN: mitochondrial inner membrane; EXPRESSED IN: 18 plant structures; EXPRESSED DURING: 7 growth stages; CONTAINS InterPro DOMAIN/s: ATPase assembly factor ATP10, mitochondria (InterPro:IPR007849); Has 152 Blast hits to 152 proteins in 76 species…	2;2	2;2	2;2	>AT1G08220.2 | Symbols: | FUNCTIONS IN: molecular_function unknown; INVOLVED IN: mitochondrial proton-transporting ATP synthase complex assembly; LOCATED IN: mitochondrial inner membrane; EXPRESSED IN: 18 plant structures; EXPRESSED DURING: 7 growth stage	2	2	2	2	2	2	1	2	2	2	1	2	2	2	1	2	16.8	16.8	16.8	22.671	202	202;274	2	2	1	2	3.0494e-08	16.8	16.8	9.4	16.8	463650000	154820000	145890000	90002000	72933000	124200000	178360000	0	109080000	1	2	1	0
>AT1G08250.1 | Symbols: ADT6 | arogenate dehydratase 6 | chr1:2588994-2590235 REVERSE LENGTH=413	>AT1G08250.1 | Symbols: ADT6 | arogenate dehydratase 6 | chr1:2588994-2590235 REVERSE LENGTH=413	6	4	3	>AT1G08250.1 | Symbols: ADT6 | arogenate dehydratase 6 | chr1:2588994-2590235 REVERSE LENGTH=413	1	6	4	3	4	4	2	5	2	2	1	3	2	2	1	2	23.5	18.2	14	44.801	413	413	2	2	1	3	5.3891e-57	13.8	13.8	7.5	18.9	196860000	33051000	35604000	21091000	107120000	32029000	41338000	0	0	0	2	0	3
>AT1G08360.1 | Symbols: | Ribosomal protein L1p/L10e family | chr1:2636231-2637694 FORWARD LENGTH=216;>AT5G22440.2 | Symbols: | Ribosomal protein L1p/L10e family | chr5:7435328-7436486 REVERSE LENGTH=217;>AT5G22440.1 | Symbols: | Ribosomal protein L1p/L10e family | chr5:7435328-7436486 REVERSE LENGTH=217	>AT1G08360.1 | Symbols: | Ribosomal protein L1p/L10e family | chr1:2636231-2637694 FORWARD LENGTH=216;>AT5G22440.2 | Symbols: | Ribosomal protein L1p/L10e family | chr5:7435328-7436486 REVERSE LENGTH=217;>AT5G22440.1 | Symbols: | Ribosomal protein L1p/L10e family | chr5:7435328-7436486 REVERSE LENGTH=217	6;3;3	6;3;3	4;1;1	>AT1G08360.1 | Symbols: | Ribosomal protein L1p/L10e family | chr1:2636231-2637694 FORWARD LENGTH=216;>AT5G22440.2 | Symbols: | Ribosomal protein L1p/L10e family | chr5:7435328-7436486 REVERSE LENGTH=217;>AT5G22440.1 | Symbols: | Ribosomal protein L1p/L	3	6	6	4	3	3	6	6	3	3	6	6	2	2	4	4	31	31	16.7	24.469	216	216;217;217	7	7	11	11	1.8016e-43	17.6	17.6	31	31	10110000000	2695300000	2719500000	2346900000	2348400000	2782100000	3597800000	2359500000	2258500000	6	6	11	11
>AT1G08420.2 | Symbols: BSL2 | BRI1 suppressor 1 (BSU1)-like 2 | chr1:2649959-2656564 FORWARD LENGTH=1013;>AT1G08420.1 | Symbols: BSL2 | BRI1 suppressor 1 (BSU1)-like 2 | chr1:2649959-2656564 FORWARD LENGTH=1018	>AT1G08420.2 | Symbols: BSL2 | BRI1 suppressor 1 (BSU1)-like 2 | chr1:2649959-2656564 FORWARD LENGTH=1013;>AT1G08420.1 | Symbols: BSL2 | BRI1 suppressor 1 (BSU1)-like 2 | chr1:2649959-2656564 FORWARD LENGTH=1018	5;5	4;4	2;2	>AT1G08420.2 | Symbols: BSL2 | BRI1 suppressor 1 (BSU1)-like 2 | chr1:2649959-2656564 FORWARD LENGTH=1013;>AT1G08420.1 | Symbols: BSL2 | BRI1 suppressor 1 (BSU1)-like 2 | chr1:2649959-2656564 FORWARD LENGTH=1018	2	5	4	2	3	4	5	5	3	3	4	4	1	1	2	2	7.4	5.9	2.5	108.08	1013	1013;1018	3	3	4	5	2.4838e-21	4.6	6.1	7.4	7.4	769860000	290600000	218590000	141260000	119420000	278100000	265230000	144620000	124750000	2	2	1	3
>AT1G08450.2 | Symbols: CRT3, PSL1, EBS2, AtCRT3 | calreticulin 3 | chr1:2668008-2671800 REVERSE LENGTH=370;>AT1G08450.1 | Symbols: CRT3, PSL1, EBS2, AtCRT3 | calreticulin 3 | chr1:2668008-2671800 REVERSE LENGTH=424;>AT1G08450.3 | Symbols: CRT3 | calreticulin 3 | chr1:2668008-2671800 REVERSE LENGTH=399	>AT1G08450.2 | Symbols: CRT3, PSL1, EBS2, AtCRT3 | calreticulin 3 | chr1:2668008-2671800 REVERSE LENGTH=370;>AT1G08450.1 | Symbols: CRT3, PSL1, EBS2, AtCRT3 | calreticulin 3 | chr1:2668008-2671800 REVERSE LENGTH=424;>AT1G08450.3 | Symbols: CRT3 | calreticulin 3 | chr1:2668008-2671800 REVERSE LENGTH=399	3;3;2	3;3;2	3;3;2	>AT1G08450.2 | Symbols: CRT3, PSL1, EBS2, AtCRT3 | calreticulin 3 | chr1:2668008-2671800 REVERSE LENGTH=370;>AT1G08450.1 | Symbols: CRT3, PSL1, EBS2, AtCRT3 | calreticulin 3 | chr1:2668008-2671800 REVERSE LENGTH=424;>AT1G08450.3 | Symbols: CRT3 | calreticu	3	3	3	3	2	2	3	2	2	2	3	2	2	2	3	2	10.5	10.5	10.5	43.594	370	370;424;399	2	2	3	2	1.7882e-11	7.6	7.6	10.5	7.6	551520000	142990000	161260000	138410000	108860000	167840000	169340000	129750000	147330000	2	0	1	1
>AT1G08470.1 | Symbols: SSL3 | strictosidine synthase-like 3 | chr1:2682262-2683977 REVERSE LENGTH=390	>AT1G08470.1 | Symbols: SSL3 | strictosidine synthase-like 3 | chr1:2682262-2683977 REVERSE LENGTH=390	4	4	4	>AT1G08470.1 | Symbols: SSL3 | strictosidine synthase-like 3 | chr1:2682262-2683977 REVERSE LENGTH=390	1	4	4	4	4	4	3	3	4	4	3	3	4	4	3	3	17.2	17.2	17.2	44.036	390	390	4	4	3	3	1.1426e-36	17.2	17.2	14.6	14.6	959670000	300350000	197350000	239930000	222040000	237600000	180190000	299850000	348440000	5	3	5	3
>AT1G08480.1 | Symbols: | unknown protein; FUNCTIONS IN: molecular_function unknown; INVOLVED IN: biological_process unknown; LOCATED IN: mitochondrion, plasma membrane, plastid, vacuole; EXPRESSED IN: 27 plant structures; EXPRESSED DURING: 15 growth stages; Has 39 Blast hits to 39 proteins in 13 species: Archae - 0; Bacteria - 0; Metazoa - 0; Fungi - 0; Plants - 39; Viruses - 0; Other Eukaryotes…	>AT1G08480.1 | Symbols: | unknown protein; FUNCTIONS IN: molecular_function unknown; INVOLVED IN: biological_process unknown; LOCATED IN: mitochondrion, plasma membrane, plastid, vacuole; EXPRESSED IN: 27 plant structures; EXPRESSED DURING: 15 growth stages; Has 39 Blast hits to 39 proteins in 13 species: Archae - 0; Bacteria - 0; Metazoa - 0; Fungi - 0; Plants - 39; Viruses - 0; Other Eukaryotes…	5	5	5	>AT1G08480.1 | Symbols: | unknown protein; FUNCTIONS IN: molecular_function unknown; INVOLVED IN: biological_process unknown; LOCATED IN: mitochondrion, plasma membrane, plastid, vacuole; EXPRESSED IN: 27 plant structures; EXPRESSED DURING: 15 growth stag	1	5	5	5	3	3	4	5	3	3	4	5	3	3	4	5	37.3	37.3	37.3	15.812	142	142	5	4	6	7	3.3998e-22	31.7	31.7	36.6	37.3	8108700000	1919600000	2444400000	2163900000	1580800000	2310400000	2647200000	2062000000	2028800000	5	2	4	7
>AT1G08490.1 | Symbols: ATSUFS, SUFS, ATCPNIFS, ATNFS2, CPNIFS | chloroplastic NIFS-like cysteine desulfurase | chr1:2685980-2688547 REVERSE LENGTH=463	>AT1G08490.1 | Symbols: ATSUFS, SUFS, ATCPNIFS, ATNFS2, CPNIFS | chloroplastic NIFS-like cysteine desulfurase | chr1:2685980-2688547 REVERSE LENGTH=463	2	2	2	>AT1G08490.1 | Symbols: ATSUFS, SUFS, ATCPNIFS, ATNFS2, CPNIFS | chloroplastic NIFS-like cysteine desulfurase | chr1:2685980-2688547 REVERSE LENGTH=463	1	2	2	2	1	2	1	2	1	2	1	2	1	2	1	2	9.1	9.1	9.1	50.485	463	463	1	2	1	2	5.2489e-18	3	9.1	3	9.1	280230000	74962000	85820000	53754000	65696000	0	73252000	0	106450000	1	1	1	1
>AT1G08640.1 | Symbols: CJD1 | Chloroplast J-like domain 1 | chr1:2748714-2751209 REVERSE LENGTH=294	>AT1G08640.1 | Symbols: CJD1 | Chloroplast J-like domain 1 | chr1:2748714-2751209 REVERSE LENGTH=294	1	1	1	>AT1G08640.1 | Symbols: CJD1 | Chloroplast J-like domain 1 | chr1:2748714-2751209 REVERSE LENGTH=294	1	1	1	1	1	1	1	1	1	1	1	1	1	1	1	1	6.5	6.5	6.5	32.902	294	294	1	1	1	1	1.0461e-38	6.5	6.5	6.5	6.5	365100000	137770000	82606000	80721000	64001000	0	0	0	80401000	1	1	1	1
>AT1G08750.3 | Symbols: | Peptidase C13 family | chr1:2801283-2804392 FORWARD LENGTH=388;>AT1G08750.2 | Symbols: | Peptidase C13 family | chr1:2801283-2804392 FORWARD LENGTH=388;>AT1G08750.1 | Symbols: | Peptidase C13 family | chr1:2801283-2804392 FORWARD LENGTH=388	>AT1G08750.3 | Symbols: | Peptidase C13 family | chr1:2801283-2804392 FORWARD LENGTH=388;>AT1G08750.2 | Symbols: | Peptidase C13 family | chr1:2801283-2804392 FORWARD LENGTH=388;>AT1G08750.1 | Symbols: | Peptidase C13 family | chr1:2801283-2804392 FORWARD LENGTH=388	2;2;2	2;2;2	2;2;2	>AT1G08750.3 | Symbols: | Peptidase C13 family | chr1:2801283-2804392 FORWARD LENGTH=388;>AT1G08750.2 | Symbols: | Peptidase C13 family | chr1:2801283-2804392 FORWARD LENGTH=388;>AT1G08750.1 | Symbols: | Peptidase C13 family | chr1:2801283-2804392 FORWA	3	2	2	2	1	1	2	1	1	1	2	1	1	1	2	1	12.4	12.4	12.4	44.542	388	388;388;388	1	1	2	1	3.0387e-06	4.4	4.4	12.4	8	134950000	42634000	23585000	39799000	28933000	0	0	43681000	0	2	0	0	1
>AT1G08770.1 | Symbols: PRA1.E | prenylated RAB acceptor 1.E | chr1:2808933-2809562 FORWARD LENGTH=209	>AT1G08770.1 | Symbols: PRA1.E | prenylated RAB acceptor 1.E | chr1:2808933-2809562 FORWARD LENGTH=209	1	1	1	>AT1G08770.1 | Symbols: PRA1.E | prenylated RAB acceptor 1.E | chr1:2808933-2809562 FORWARD LENGTH=209	1	1	1	1	1	1	1	1	1	1	1	1	1	1	1	1	5.7	5.7	5.7	22.415	209	209	1	1	1	1	6.1692e-10	5.7	5.7	5.7	5.7	203780000	51042000	25004000	69871000	57865000	0	0	0	72692000	2	2	1	1
>AT1G08830.2 | Symbols: CSD1 | copper/zinc superoxide dismutase 1 | chr1:2827700-2829053 FORWARD LENGTH=152;>AT1G08830.1 | Symbols: CSD1 | copper/zinc superoxide dismutase 1 | chr1:2827700-2829053 FORWARD LENGTH=152	>AT1G08830.2 | Symbols: CSD1 | copper/zinc superoxide dismutase 1 | chr1:2827700-2829053 FORWARD LENGTH=152;>AT1G08830.1 | Symbols: CSD1 | copper/zinc superoxide dismutase 1 | chr1:2827700-2829053 FORWARD LENGTH=152	1;1	1;1	1;1	>AT1G08830.2 | Symbols: CSD1 | copper/zinc superoxide dismutase 1 | chr1:2827700-2829053 FORWARD LENGTH=152;>AT1G08830.1 | Symbols: CSD1 | copper/zinc superoxide dismutase 1 | chr1:2827700-2829053 FORWARD LENGTH=152	2	1	1	1	1	1	0	1	1	1	0	1	1	1	0	1	9.9	9.9	9.9	15.098	152	152;152	1	1		1	0.0006067	9.9	9.9	0	9.9	155810000	89646000	48195000	0	17972000	0	0	0	22577000	0	1	0	0
>AT5G54640.1 | Symbols: HTA1, RAT5, ATHTA1 | Histone superfamily protein | chr5:22196540-22197279 FORWARD LENGTH=130;>AT4G27230.2 | Symbols: HTA2 | histone H2A 2 | chr4:13637515-13638325 REVERSE LENGTH=131;>AT4G27230.1 | Symbols: HTA2 | histone H2A 2 | chr4:13637515-13638325 REVERSE LENGTH=131;>AT3G20670.1 | Symbols: HTA13 | histone H2A 13 | chr3:7229472-7229963 FORWARD LENGTH=132;>AT1G51060.1 | …	>AT5G54640.1 | Symbols: HTA1, RAT5, ATHTA1 | Histone superfamily protein | chr5:22196540-22197279 FORWARD LENGTH=130;>AT4G27230.2 | Symbols: HTA2 | histone H2A 2 | chr4:13637515-13638325 REVERSE LENGTH=131;>AT4G27230.1 | Symbols: HTA2 | histone H2A 2 | chr4:13637515-13638325 REVERSE LENGTH=131;>AT3G20670.1 | Symbols: HTA13 | histone H2A 13 | chr3:7229472-7229963 FORWARD LENGTH=132;>AT1G51060.1 | …	2;2;2;2;2;2;2	1;1;1;1;1;1;1	1;1;1;1;1;1;1	>AT5G54640.1 | Symbols: HTA1, RAT5, ATHTA1 | Histone superfamily protein | chr5:22196540-22197279 FORWARD LENGTH=130;>AT4G27230.2 | Symbols: HTA2 | histone H2A 2 | chr4:13637515-13638325 REVERSE LENGTH=131;>AT4G27230.1 | Symbols: HTA2 | histone H2A 2 | chr	7	2	1	1	2	2	2	2	1	1	1	1	1	1	1	1	12.3	5.4	5.4	13.658	130	130;131;131;132;132;142;142	1	1	1	1	3.0096e-06	12.3	12.3	12.3	12.3	1201700000	64971000	110070000	526350000	500330000	0	0	0	628540000	0	0	1	0
>AT1G08890.1 | Symbols: | Major facilitator superfamily protein | chr1:2848374-2852016 FORWARD LENGTH=464	>AT1G08890.1 | Symbols: | Major facilitator superfamily protein | chr1:2848374-2852016 FORWARD LENGTH=464	1	1	1	>AT1G08890.1 | Symbols: | Major facilitator superfamily protein | chr1:2848374-2852016 FORWARD LENGTH=464	1	1	1	1	1	1	1	1	1	1	1	1	1	1	1	1	2.4	2.4	2.4	50.965	464	464	1	1	1	1	1.7299e-06	2.4	2.4	2.4	2.4	275830000	119000000	85892000	42766000	28175000	0	0	0	35394000	1	0	1	0
>AT1G08930.2 | Symbols: ERD6 | Major facilitator superfamily protein | chr1:2873604-2876979 FORWARD LENGTH=496;>AT1G08930.1 | Symbols: ERD6 | Major facilitator superfamily protein | chr1:2873604-2876979 FORWARD LENGTH=496	>AT1G08930.2 | Symbols: ERD6 | Major facilitator superfamily protein | chr1:2873604-2876979 FORWARD LENGTH=496;>AT1G08930.1 | Symbols: ERD6 | Major facilitator superfamily protein | chr1:2873604-2876979 FORWARD LENGTH=496	1;1	1;1	1;1	>AT1G08930.2 | Symbols: ERD6 | Major facilitator superfamily protein | chr1:2873604-2876979 FORWARD LENGTH=496;>AT1G08930.1 | Symbols: ERD6 | Major facilitator superfamily protein | chr1:2873604-2876979 FORWARD LENGTH=496	2	1	1	1	1	1	1	0	1	1	1	0	1	1	1	0	2.8	2.8	2.8	54.354	496	496;496	1	1	1		7.5868e-05	2.8	2.8	2.8	0	80852000	45378000	29147000	6327700	0	0	0	6944900	0	1	0	0	0
>AT1G54830.3 | Symbols: NF-YC3 | nuclear factor Y, subunit C3 | chr1:20451672-20452325 FORWARD LENGTH=217;>AT1G54830.2 | Symbols: NF-YC3 | nuclear factor Y, subunit C3 | chr1:20451672-20452325 FORWARD LENGTH=217;>AT1G54830.1 | Symbols: NF-YC3 | nuclear factor Y, subunit C3 | chr1:20451672-20452325 FORWARD LENGTH=217;>AT1G08970.4 | Symbols: HAP5C, NF-YC9 | nuclear factor Y, subunit C9 | chr1:28831…	>AT1G54830.3 | Symbols: NF-YC3 | nuclear factor Y, subunit C3 | chr1:20451672-20452325 FORWARD LENGTH=217;>AT1G54830.2 | Symbols: NF-YC3 | nuclear factor Y, subunit C3 | chr1:20451672-20452325 FORWARD LENGTH=217;>AT1G54830.1 | Symbols: NF-YC3 | nuclear factor Y, subunit C3 | chr1:20451672-20452325 FORWARD LENGTH=217;>AT1G08970.4 | Symbols: HAP5C, NF-YC9 | nuclear factor Y, subunit C9 | chr1:28831…	1;1;1;1;1;1;1	1;1;1;1;1;1;1	1;1;1;1;1;1;1	>AT1G54830.3 | Symbols: NF-YC3 | nuclear factor Y, subunit C3 | chr1:20451672-20452325 FORWARD LENGTH=217;>AT1G54830.2 | Symbols: NF-YC3 | nuclear factor Y, subunit C3 | chr1:20451672-20452325 FORWARD LENGTH=217;>AT1G54830.1 | Symbols: NF-YC3 | nuclear fac	7	1	1	1	1	1	1	1	1	1	1	1	1	1	1	1	5.5	5.5	5.5	24.312	217	217;217;217;231;231;231;231	1	1	2	2	6.5796e-10	5.5	5.5	5.5	5.5	709010000	153570000	147200000	276100000	132140000	0	0	0	128400000	1	1	1	1
>AT1G08980.1 | Symbols: ATAMI1, AMI1, ATTOC64-I, TOC64-I | amidase 1 | chr1:2884455-2886430 FORWARD LENGTH=425	>AT1G08980.1 | Symbols: ATAMI1, AMI1, ATTOC64-I, TOC64-I | amidase 1 | chr1:2884455-2886430 FORWARD LENGTH=425	3	3	3	>AT1G08980.1 | Symbols: ATAMI1, AMI1, ATTOC64-I, TOC64-I | amidase 1 | chr1:2884455-2886430 FORWARD LENGTH=425	1	3	3	3	2	2	1	3	2	2	1	3	2	2	1	3	9.6	9.6	9.6	45.056	425	425	2	2	1	4	2.0616e-11	7.1	7.1	3.8	9.6	148830000	34142000	44196000	26956000	43539000	0	85934000	0	18807000	1	2	1	1
>AT1G08990.1 | Symbols: PGSIP5 | plant glycogenin-like starch initiation protein 5 | chr1:2888753-2890753 FORWARD LENGTH=566	>AT1G08990.1 | Symbols: PGSIP5 | plant glycogenin-like starch initiation protein 5 | chr1:2888753-2890753 FORWARD LENGTH=566	1	1	1	>AT1G08990.1 | Symbols: PGSIP5 | plant glycogenin-like starch initiation protein 5 | chr1:2888753-2890753 FORWARD LENGTH=566	1	1	1	1	0	1	0	1	0	1	0	1	0	1	0	1	1.9	1.9	1.9	65.632	566	566		1		1	0.0016146	0	1.9	0	1.9	41089000	0	25734000	0	15355000	0	0	0	19290000	0	1	0	0
>AT1G09010.1 | Symbols: | glycoside hydrolase family 2 protein | chr1:2895259-2899287 REVERSE LENGTH=944	>AT1G09010.1 | Symbols: | glycoside hydrolase family 2 protein | chr1:2895259-2899287 REVERSE LENGTH=944	5	5	5	>AT1G09010.1 | Symbols: | glycoside hydrolase family 2 protein | chr1:2895259-2899287 REVERSE LENGTH=944	1	5	5	5	5	4	3	4	5	4	3	4	5	4	3	4	8.2	8.2	8.2	107.66	944	944	6	5	3	5	1.8199e-40	8.2	7	5	7	521040000	200680000	141800000	44048000	134510000	184520000	156350000	92738000	144960000	4	5	1	2
>AT1G09020.1 | Symbols: SNF4, ATSNF4 | homolog of yeast sucrose nonfermenting 4 | chr1:2900149-2904212 REVERSE LENGTH=487	>AT1G09020.1 | Symbols: SNF4, ATSNF4 | homolog of yeast sucrose nonfermenting 4 | chr1:2900149-2904212 REVERSE LENGTH=487	7	7	7	>AT1G09020.1 | Symbols: SNF4, ATSNF4 | homolog of yeast sucrose nonfermenting 4 | chr1:2900149-2904212 REVERSE LENGTH=487	1	7	7	7	4	6	3	5	4	6	3	5	4	6	3	5	18.5	18.5	18.5	53.466	487	487	4	6	4	6	1.0532e-40	9	16.2	6.8	13.8	1281900000	203380000	502050000	224410000	352020000	358220000	458160000	262680000	381320000	2	6	2	1
>AT1G09070.1 | Symbols: SRC2, (AT)SRC2 | soybean gene regulated by cold-2 | chr1:2927767-2928741 FORWARD LENGTH=324	>AT1G09070.1 | Symbols: SRC2, (AT)SRC2 | soybean gene regulated by cold-2 | chr1:2927767-2928741 FORWARD LENGTH=324	1	1	1	>AT1G09070.1 | Symbols: SRC2, (AT)SRC2 | soybean gene regulated by cold-2 | chr1:2927767-2928741 FORWARD LENGTH=324	1	1	1	1	1	1	1	1	1	1	1	1	1	1	1	1	3.7	3.7	3.7	34.189	324	324	1	2	1	1	4.6622e-15	3.7	3.7	3.7	3.7	325360000	126500000	134460000	42503000	21900000	0	0	0	27512000	1	1	0	0
>AT1G09090.2 | Symbols: ATRBOHB, RBOHB | respiratory burst oxidase homolog B | chr1:2932743-2936495 FORWARD LENGTH=843;>AT1G64060.1 | Symbols: ATRBOH F, ATRBOHF, RBOHAP108, RBOHF, RBOH F | respiratory burst oxidase protein F | chr1:23770266-23776317 FORWARD LENGTH=944	>AT1G09090.2 | Symbols: ATRBOHB, RBOHB | respiratory burst oxidase homolog B | chr1:2932743-2936495 FORWARD LENGTH=843;>AT1G64060.1 | Symbols: ATRBOH F, ATRBOHF, RBOHAP108, RBOHF, RBOH F | respiratory burst oxidase protein F | chr1:23770266-23776317 FORWARD LENGTH=944	1;1	1;1	1;1	>AT1G09090.2 | Symbols: ATRBOHB, RBOHB | respiratory burst oxidase homolog B | chr1:2932743-2936495 FORWARD LENGTH=843;>AT1G64060.1 | Symbols: ATRBOH F, ATRBOHF, RBOHAP108, RBOHF, RBOH F | respiratory burst oxidase protein F | chr1:23770266-23776317 FORWAR	2	1	1	1	0	0	1	1	0	0	1	1	0	0	1	1	1.8	1.8	1.8	96.389	843	843;944			1	1	0.0012135	0	0	1.8	1.8	27388000	0	0	13854000	13534000	0	0	0	17002000	0	0	1	0
>AT1G09100.1 | Symbols: RPT5B | 26S proteasome AAA-ATPase subunit RPT5B | chr1:2936675-2939258 REVERSE LENGTH=423	>AT1G09100.1 | Symbols: RPT5B | 26S proteasome AAA-ATPase subunit RPT5B | chr1:2936675-2939258 REVERSE LENGTH=423	12	1	1	>AT1G09100.1 | Symbols: RPT5B | 26S proteasome AAA-ATPase subunit RPT5B | chr1:2936675-2939258 REVERSE LENGTH=423	1	12	1	1	8	10	11	10	1	1	1	1	1	1	1	1	38.1	6.1	6.1	47.037	423	423	1	1	1	1	4.1746e-98	28.6	35.2	35.5	32.6	168480000	65677000	33865000	36322000	32620000	0	0	0	40979000	0	1	1	1
>AT1G09130.2 | Symbols: | ATP-dependent caseinolytic (Clp) protease/crotonase family protein | chr1:2940063-2942217 REVERSE LENGTH=330;>AT1G09130.1 | Symbols: | ATP-dependent caseinolytic (Clp) protease/crotonase family protein | chr1:2940063-2942217 REVERSE LENGTH=330;>AT1G09130.3 | Symbols: | ATP-dependent caseinolytic (Clp) protease/crotonase family protein | chr1:2939731-2942217 REVERSE LENGT…	>AT1G09130.2 | Symbols: | ATP-dependent caseinolytic (Clp) protease/crotonase family protein | chr1:2940063-2942217 REVERSE LENGTH=330;>AT1G09130.1 | Symbols: | ATP-dependent caseinolytic (Clp) protease/crotonase family protein | chr1:2940063-2942217 REVERSE LENGTH=330;>AT1G09130.3 | Symbols: | ATP-dependent caseinolytic (Clp) protease/crotonase family protein | chr1:2939731-2942217 REVERSE LENGT…	3;3;3	3;3;3	3;3;3	>AT1G09130.2 | Symbols: | ATP-dependent caseinolytic (Clp) protease/crotonase family protein | chr1:2940063-2942217 REVERSE LENGTH=330;>AT1G09130.1 | Symbols: | ATP-dependent caseinolytic (Clp) protease/crotonase family protein | chr1:2940063-2942217 REV	3	3	3	3	2	3	2	3	2	3	2	3	2	3	2	3	13	13	13	36.307	330	330;330;370	2	3	2	3	4.0766e-32	8.5	13	8.5	13	779790000	199450000	337070000	90255000	153010000	288440000	295770000	153690000	134510000	2	4	2	2
>AT1G09150.1 | Symbols: | pseudouridine synthase and archaeosine transglycosylase (PUA) domain-containing protein | chr1:2946599-2948908 FORWARD LENGTH=181	>AT1G09150.1 | Symbols: | pseudouridine synthase and archaeosine transglycosylase (PUA) domain-containing protein | chr1:2946599-2948908 FORWARD LENGTH=181	5	4	4	>AT1G09150.1 | Symbols: | pseudouridine synthase and archaeosine transglycosylase (PUA) domain-containing protein | chr1:2946599-2948908 FORWARD LENGTH=181	1	5	4	4	4	3	5	4	3	2	4	3	3	2	4	3	35.9	32	32	20.457	181	181	4	2	5	4	1.8466e-15	30.9	23.8	35.9	28.7	706210000	239580000	76854000	230870000	158900000	209870000	171150000	182660000	215930000	1	1	4	2
>AT5G65360.1 | Symbols: | Histone superfamily protein | chr5:26120099-26120509 REVERSE LENGTH=136;>AT5G10400.1 | Symbols: | Histone superfamily protein | chr5:3270478-3270888 REVERSE LENGTH=136;>AT5G10390.1 | Symbols: | Histone superfamily protein | chr5:3269065-3269475 REVERSE LENGTH=136;>AT3G27360.1 | Symbols: | Histone superfamily protein | chr3:10129459-10129869 REVERSE LENGTH=136;>AT1G09200.…	>AT5G65360.1 | Symbols: | Histone superfamily protein | chr5:26120099-26120509 REVERSE LENGTH=136;>AT5G10400.1 | Symbols: | Histone superfamily protein | chr5:3270478-3270888 REVERSE LENGTH=136;>AT5G10390.1 | Symbols: | Histone superfamily protein | chr5:3269065-3269475 REVERSE LENGTH=136;>AT3G27360.1 | Symbols: | Histone superfamily protein | chr3:10129459-10129869 REVERSE LENGTH=136;>AT1G09200.…	3;3;3;3;3;2;2;1	1;1;1;1;1;1;1;1	1;1;1;1;1;1;1;1	>AT5G65360.1 | Symbols: | Histone superfamily protein | chr5:26120099-26120509 REVERSE LENGTH=136;>AT5G10400.1 | Symbols: | Histone superfamily protein | chr5:3270478-3270888 REVERSE LENGTH=136;>AT5G10390.1 | Symbols: | Histone superfamily protein | chr	8	3	1	1	2	2	3	2	1	1	1	1	1	1	1	1	16.9	6.6	6.6	15.268	136	136;136;136;136;136;136;139;137	1	1	1	1	3.2028e-08	11.8	11.8	16.9	11.8	3009100000	865280000	766320000	685930000	691570000	0	0	0	868780000	1	1	1	1
>AT1G09210.1 | Symbols: CRT1b, AtCRT1b | calreticulin 1b | chr1:2973217-2976655 REVERSE LENGTH=424	>AT1G09210.1 | Symbols: CRT1b, AtCRT1b | calreticulin 1b | chr1:2973217-2976655 REVERSE LENGTH=424	8	8	6	>AT1G09210.1 | Symbols: CRT1b, AtCRT1b | calreticulin 1b | chr1:2973217-2976655 REVERSE LENGTH=424	1	8	8	6	6	5	7	8	6	5	7	8	4	3	5	6	32.1	32.1	23.8	48.156	424	424	7	6	9	10	4.6347e-36	25.7	20	30	32.1	2914300000	642810000	518930000	965250000	787320000	648420000	769460000	961770000	899250000	2	5	8	4
>AT1G09270.3 | Symbols: IMPA-4 | importin alpha isoform 4 | chr1:2995162-2997833 FORWARD LENGTH=456;>AT1G09270.2 | Symbols: IMPA-4 | importin alpha isoform 4 | chr1:2994506-2997833 FORWARD LENGTH=538;>AT1G09270.1 | Symbols: IMPA-4 | importin alpha isoform 4 | chr1:2994506-2997833 FORWARD LENGTH=538	>AT1G09270.3 | Symbols: IMPA-4 | importin alpha isoform 4 | chr1:2995162-2997833 FORWARD LENGTH=456;>AT1G09270.2 | Symbols: IMPA-4 | importin alpha isoform 4 | chr1:2994506-2997833 FORWARD LENGTH=538;>AT1G09270.1 | Symbols: IMPA-4 | importin alpha isoform 4 | chr1:2994506-2997833 FORWARD LENGTH=538	7;7;7	6;6;6	6;6;6	>AT1G09270.3 | Symbols: IMPA-4 | importin alpha isoform 4 | chr1:2995162-2997833 FORWARD LENGTH=456;>AT1G09270.2 | Symbols: IMPA-4 | importin alpha isoform 4 | chr1:2994506-2997833 FORWARD LENGTH=538;>AT1G09270.1 | Symbols: IMPA-4 | importin alpha isoform	3	7	6	6	5	5	6	7	4	4	5	6	4	4	5	6	23.2	20.8	20.8	50.078	456	456;538;538	7	6	7	10	1.3661e-86	15.4	15.4	19.3	23.2	2192200000	470700000	508190000	526880000	686420000	365810000	257590000	691270000	1081900000	5	4	7	8
>AT1G09330.1 | Symbols: | unknown protein; FUNCTIONS IN: molecular_function unknown; INVOLVED IN: biological_process unknown; LOCATED IN: integral to membrane; EXPRESSED IN: 24 plant structures; EXPRESSED DURING: 15 growth stages; CONTAINS InterPro DOMAIN/s: Protein of unknown function DUF846, eukaryotic (InterPro:IPR008564); Has 518 Blast hits to 518 proteins in 206 species: Archae - 0; Bacteria…	>AT1G09330.1 | Symbols: | unknown protein; FUNCTIONS IN: molecular_function unknown; INVOLVED IN: biological_process unknown; LOCATED IN: integral to membrane; EXPRESSED IN: 24 plant structures; EXPRESSED DURING: 15 growth stages; CONTAINS InterPro DOMAIN/s: Protein of unknown function DUF846, eukaryotic (InterPro:IPR008564); Has 518 Blast hits to 518 proteins in 206 species: Archae - 0; Bacteria…	4	4	4	>AT1G09330.1 | Symbols: | unknown protein; FUNCTIONS IN: molecular_function unknown; INVOLVED IN: biological_process unknown; LOCATED IN: integral to membrane; EXPRESSED IN: 24 plant structures; EXPRESSED DURING: 15 growth stages; CONTAINS InterPro DOMAIN	1	4	4	4	4	4	2	3	4	4	2	3	4	4	2	3	30.1	30.1	30.1	21.238	186	186	4	5	2	3	1.4321e-33	30.1	30.1	14.5	20.4	1998100000	773770000	676740000	212700000	334920000	572210000	522810000	669900000	402490000	4	3	1	1
>AT1G09340.1 | Symbols: CRB, CSP41B, HIP1.3 | chloroplast RNA binding | chr1:3015473-3018035 FORWARD LENGTH=378	>AT1G09340.1 | Symbols: CRB, CSP41B, HIP1.3 | chloroplast RNA binding | chr1:3015473-3018035 FORWARD LENGTH=378	2	2	2	>AT1G09340.1 | Symbols: CRB, CSP41B, HIP1.3 | chloroplast RNA binding | chr1:3015473-3018035 FORWARD LENGTH=378	1	2	2	2	2	2	1	1	2	2	1	1	2	2	1	1	7.9	7.9	7.9	42.619	378	378	2	2	1	1	2.6493e-27	7.9	7.9	3.7	3.7	197160000	82782000	58143000	30434000	25795000	83151000	65469000	0	0	3	2	1	0
>AT1G09430.1 | Symbols: ACLA-3 | ATP-citrate lyase A-3 | chr1:3042135-3044978 FORWARD LENGTH=424	>AT1G09430.1 | Symbols: ACLA-3 | ATP-citrate lyase A-3 | chr1:3042135-3044978 FORWARD LENGTH=424	12	9	9	>AT1G09430.1 | Symbols: ACLA-3 | ATP-citrate lyase A-3 | chr1:3042135-3044978 FORWARD LENGTH=424	1	12	9	9	10	11	10	11	7	8	7	8	7	8	7	8	39.9	32.1	32.1	46.945	424	424	9	9	11	12	4.8639e-60	32.8	37.3	31.6	34.2	5820800000	1424100000	925370000	1504700000	1966500000	1519600000	743690000	1737700000	2337500000	5	6	10	9
>AT1G09560.1 | Symbols: GLP5 | germin-like protein 5 | chr1:3093896-3094639 FORWARD LENGTH=219;>AT1G02335.1 | Symbols: GL22 | germin-like protein subfamily 2 member 2 precursor | chr1:463979-464876 REVERSE LENGTH=219;>AT3G62020.2 | Symbols: GLP10 | germin-like protein 10 | chr3:22971443-22972018 REVERSE LENGTH=191;>AT3G62020.1 | Symbols: GLP10 | germin-like protein 10 | chr3:22971443-22972192 REV…	>AT1G09560.1 | Symbols: GLP5 | germin-like protein 5 | chr1:3093896-3094639 FORWARD LENGTH=219;>AT1G02335.1 | Symbols: GL22 | germin-like protein subfamily 2 member 2 precursor | chr1:463979-464876 REVERSE LENGTH=219	3;2;1;1	3;2;1;1	3;2;1;1	>AT1G09560.1 | Symbols: GLP5 | germin-like protein 5 | chr1:3093896-3094639 FORWARD LENGTH=219;>AT1G02335.1 | Symbols: GL22 | germin-like protein subfamily 2 member 2 precursor | chr1:463979-464876 REVERSE LENGTH=219	4	3	3	3	2	3	2	3	2	3	2	3	2	3	2	3	18.3	18.3	18.3	22.868	219	219;219;191;220	5	5	4	6	5.9914e-32	15.1	18.3	15.1	18.3	4272600000	1306100000	857950000	949310000	1159300000	1298600000	1241900000	1037200000	1149800000	7	4	5	5
>AT1G57860.1 | Symbols: | Translation protein SH3-like family protein | chr1:21430034-21430827 REVERSE LENGTH=164;>AT1G57660.1 | Symbols: | Translation protein SH3-like family protein | chr1:21355567-21356364 FORWARD LENGTH=164;>AT1G09690.1 | Symbols: | Translation protein SH3-like family protein | chr1:3136407-3137430 REVERSE LENGTH=164;>AT1G09590.1 | Symbols: | Translation protein SH3-like fami…	>AT1G57860.1 | Symbols: | Translation protein SH3-like family protein | chr1:21430034-21430827 REVERSE LENGTH=164;>AT1G57660.1 | Symbols: | Translation protein SH3-like family protein | chr1:21355567-21356364 FORWARD LENGTH=164;>AT1G09690.1 | Symbols: | Translation protein SH3-like family protein | chr1:3136407-3137430 REVERSE LENGTH=164;>AT1G09590.1 | Symbols: | Translation protein SH3-like fami…	7;7;7;7	7;7;7;7	7;7;7;7	>AT1G57860.1 | Symbols: | Translation protein SH3-like family protein | chr1:21430034-21430827 REVERSE LENGTH=164;>AT1G57660.1 | Symbols: | Translation protein SH3-like family protein | chr1:21355567-21356364 FORWARD LENGTH=164;>AT1G09690.1 | Symbols: |	4	7	7	7	4	4	6	7	4	4	6	7	4	4	6	7	39	39	39	18.709	164	164;164;164;164	4	5	6	7	5.0166e-31	21.3	21.3	39	39	10706000000	3354100000	2887500000	2887900000	1576700000	5234000000	3152300000	2080000000	1307800000	4	4	7	6
>AT1G09620.1 | Symbols: | ATP binding;leucine-tRNA ligases;aminoacyl-tRNA ligases;nucleotide binding;ATP binding;aminoacyl-tRNA ligases | chr1:3113077-3116455 REVERSE LENGTH=1091	>AT1G09620.1 | Symbols: | ATP binding;leucine-tRNA ligases;aminoacyl-tRNA ligases;nucleotide binding;ATP binding;aminoacyl-tRNA ligases | chr1:3113077-3116455 REVERSE LENGTH=1091	28	28	28	>AT1G09620.1 | Symbols: | ATP binding;leucine-tRNA ligases;aminoacyl-tRNA ligases;nucleotide binding;ATP binding;aminoacyl-tRNA ligases | chr1:3113077-3116455 REVERSE LENGTH=1091	1	28	28	28	23	24	27	22	23	24	27	22	23	24	27	22	34.3	34.3	34.3	123.45	1091	1091	25	30	40	33	3.2634e-273	27.2	28.3	33.2	27.6	11136000000	2973000000	3263500000	2705500000	2193600000	3225500000	3304000000	2513800000	2654800000	22	18	29	22
>AT1G09630.1 | Symbols: ATRAB11C, ATRABA2A, ATRAB-A2A, RAB-A2A, RAB11c | RAB GTPase 11C | chr1:3118350-3119571 REVERSE LENGTH=217	>AT1G09630.1 | Symbols: ATRAB11C, ATRABA2A, ATRAB-A2A, RAB-A2A, RAB11c | RAB GTPase 11C | chr1:3118350-3119571 REVERSE LENGTH=217	7	5	5	>AT1G09630.1 | Symbols: ATRAB11C, ATRABA2A, ATRAB-A2A, RAB-A2A, RAB11c | RAB GTPase 11C | chr1:3118350-3119571 REVERSE LENGTH=217	1	7	5	5	6	6	7	7	4	4	5	5	4	4	5	5	44.7	35	35	24.108	217	217	4	5	6	6	9.7544e-58	34.6	34.6	44.7	44.7	2856200000	791720000	667790000	730480000	666220000	731680000	748250000	812010000	894610000	6	4	7	6
>AT1G09640.1 | Symbols: | Translation elongation factor EF1B, gamma chain | chr1:3120162-3122152 FORWARD LENGTH=414;>AT1G09640.2 | Symbols: | Translation elongation factor EF1B, gamma chain | chr1:3120162-3122152 FORWARD LENGTH=265	>AT1G09640.1 | Symbols: | Translation elongation factor EF1B, gamma chain | chr1:3120162-3122152 FORWARD LENGTH=414;>AT1G09640.2 | Symbols: | Translation elongation factor EF1B, gamma chain | chr1:3120162-3122152 FORWARD LENGTH=265	17;10	8;6	8;6	>AT1G09640.1 | Symbols: | Translation elongation factor EF1B, gamma chain | chr1:3120162-3122152 FORWARD LENGTH=414;>AT1G09640.2 | Symbols: | Translation elongation factor EF1B, gamma chain | chr1:3120162-3122152 FORWARD LENGTH=265	2	17	8	8	16	16	17	16	8	7	8	7	8	7	8	7	44.4	22.2	22.2	46.66	414	414;265	17	14	12	12	2.8232e-220	40.6	41.3	44.4	42.5	24286000000	9693000000	5396700000	5213400000	3982800000	6324600000	6880500000	6161100000	6045100000	15	11	13	13
>AT1G09740.1 | Symbols: | Adenine nucleotide alpha hydrolases-like superfamily protein | chr1:3154603-3155834 FORWARD LENGTH=171	>AT1G09740.1 | Symbols: | Adenine nucleotide alpha hydrolases-like superfamily protein | chr1:3154603-3155834 FORWARD LENGTH=171	4	4	4	>AT1G09740.1 | Symbols: | Adenine nucleotide alpha hydrolases-like superfamily protein | chr1:3154603-3155834 FORWARD LENGTH=171	1	4	4	4	2	2	4	4	2	2	4	4	2	2	4	4	24.6	24.6	24.6	18.15	171	171	3	2	5	5	1.2256e-49	13.5	13.5	24.6	24.6	3174400000	701770000	545620000	999110000	927890000	820000000	743500000	880670000	1117300000	1	2	6	5
>AT1G09760.1 | Symbols: U2A' | U2 small nuclear ribonucleoprotein A | chr1:3159476-3161603 REVERSE LENGTH=249	>AT1G09760.1 | Symbols: U2A' | U2 small nuclear ribonucleoprotein A | chr1:3159476-3161603 REVERSE LENGTH=249	4	4	4	>AT1G09760.1 | Symbols: U2A | U2 small nuclear ribonucleoprotein A | chr1:3159476-3161603 REVERSE LENGTH=249	1	4	4	4	3	3	3	4	3	3	3	4	3	3	3	4	20.9	20.9	20.9	28.041	249	249	3	3	3	6	3.7373e-16	16.9	16.9	16.9	20.9	1322600000	423870000	257680000	234480000	406610000	442480000	307370000	258890000	292250000	3	3	2	3
>AT1G09770.1 | Symbols: ATCDC5, CDC5, ATMYBCDC5 | cell division cycle 5 | chr1:3162002-3165122 FORWARD LENGTH=844	>AT1G09770.1 | Symbols: ATCDC5, CDC5, ATMYBCDC5 | cell division cycle 5 | chr1:3162002-3165122 FORWARD LENGTH=844	2	2	2	>AT1G09770.1 | Symbols: ATCDC5, CDC5, ATMYBCDC5 | cell division cycle 5 | chr1:3162002-3165122 FORWARD LENGTH=844	1	2	2	2	1	2	2	2	1	2	2	2	1	2	2	2	2.4	2.4	2.4	95.766	844	844	1	2	2	2	1.5474e-06	1.5	2.4	2.4	2.4	192670000	41670000	65267000	45082000	40647000	0	68999000	49465000	55983000	1	1	2	0
>AT1G09780.1 | Symbols: | Phosphoglycerate mutase, 2,3-bisphosphoglycerate-independent | chr1:3165550-3167812 REVERSE LENGTH=557	>AT1G09780.1 | Symbols: | Phosphoglycerate mutase, 2,3-bisphosphoglycerate-independent | chr1:3165550-3167812 REVERSE LENGTH=557	23	23	16	>AT1G09780.1 | Symbols: | Phosphoglycerate mutase, 2,3-bisphosphoglycerate-independent | chr1:3165550-3167812 REVERSE LENGTH=557	1	23	23	16	17	19	22	22	17	19	22	22	12	13	16	15	54.2	54.2	36.4	60.579	557	557	30	31	30	36	1.6128e-228	44.9	48.5	51.2	52.4	22824000000	5837600000	5399200000	6475700000	5111700000	6124200000	6343400000	5891800000	5859600000	27	27	24	26
>AT1G09795.1 | Symbols: ATATP-PRT2, HISN1B, ATP-PRT2 | ATP phosphoribosyl transferase 2 | chr1:3173588-3176690 FORWARD LENGTH=413	>AT1G09795.1 | Symbols: ATATP-PRT2, HISN1B, ATP-PRT2 | ATP phosphoribosyl transferase 2 | chr1:3173588-3176690 FORWARD LENGTH=413	2	2	2	>AT1G09795.1 | Symbols: ATATP-PRT2, HISN1B, ATP-PRT2 | ATP phosphoribosyl transferase 2 | chr1:3173588-3176690 FORWARD LENGTH=413	1	2	2	2	1	2	1	0	1	2	1	0	1	2	1	0	7.7	7.7	7.7	44.756	413	413	1	2	1		6.9836e-06	5.3	7.7	2.4	0	141550000	44119000	66978000	30451000	0	0	75842000	0	0	1	2	0	0
>AT1G09830.1 | Symbols: | Glycinamide ribonucleotide (GAR) synthetase | chr1:3192783-3194936 REVERSE LENGTH=532	>AT1G09830.1 | Symbols: | Glycinamide ribonucleotide (GAR) synthetase | chr1:3192783-3194936 REVERSE LENGTH=532	4	4	4	>AT1G09830.1 | Symbols: | Glycinamide ribonucleotide (GAR) synthetase | chr1:3192783-3194936 REVERSE LENGTH=532	1	4	4	4	3	3	4	3	3	3	4	3	3	3	4	3	12.8	12.8	12.8	56.473	532	532	3	3	4	3	8.3608e-08	9	9	12.8	9	434500000	125220000	104100000	131340000	73836000	111530000	127020000	123460000	118000000	0	1	3	0
>AT1G09850.1 | Symbols: XBCP3 | xylem bark cysteine peptidase 3 | chr1:3201848-3203875 FORWARD LENGTH=437	>AT1G09850.1 | Symbols: XBCP3 | xylem bark cysteine peptidase 3 | chr1:3201848-3203875 FORWARD LENGTH=437	5	5	5	>AT1G09850.1 | Symbols: XBCP3 | xylem bark cysteine peptidase 3 | chr1:3201848-3203875 FORWARD LENGTH=437	1	5	5	5	5	5	5	4	5	5	5	4	5	5	5	4	16.9	16.9	16.9	48.073	437	437	6	7	6	5	8.6958e-60	16.9	16.9	16.9	14.4	2390600000	587300000	484360000	746110000	572850000	666410000	507850000	765230000	734800000	3	4	6	4
>AT1G09870.1 | Symbols: | histidine acid phosphatase family protein | chr1:3205817-3208444 FORWARD LENGTH=487	>AT1G09870.1 | Symbols: | histidine acid phosphatase family protein | chr1:3205817-3208444 FORWARD LENGTH=487	2	2	2	>AT1G09870.1 | Symbols: | histidine acid phosphatase family protein | chr1:3205817-3208444 FORWARD LENGTH=487	1	2	2	2	0	1	1	1	0	1	1	1	0	1	1	1	5.5	5.5	5.5	54.854	487	487		1	1	1	0.00014541	0	2.5	3.1	3.1	194380000	0	175190000	0	19193000	0	0	0	24111000	0	1	0	1
>AT1G10130.1 | Symbols: ECA3, ATECA3 | endoplasmic reticulum-type calcium-transporting ATPase 3 | chr1:3311139-3321941 FORWARD LENGTH=998	>AT1G10130.1 | Symbols: ECA3, ATECA3 | endoplasmic reticulum-type calcium-transporting ATPase 3 | chr1:3311139-3321941 FORWARD LENGTH=998	3	3	3	>AT1G10130.1 | Symbols: ECA3, ATECA3 | endoplasmic reticulum-type calcium-transporting ATPase 3 | chr1:3311139-3321941 FORWARD LENGTH=998	1	3	3	3	3	2	1	2	3	2	1	2	3	2	1	2	4.4	4.4	4.4	109.06	998	998	3	2	1	2	7.5328e-11	4.4	2.9	1.1	2.9	255160000	114460000	81277000	18195000	41226000	112050000	95252000	0	50984000	3	2	0	0
>AT1G10200.1 | Symbols: WLIM1 | GATA type zinc finger transcription factor family protein | chr1:3346677-3347763 REVERSE LENGTH=190	>AT1G10200.1 | Symbols: WLIM1 | GATA type zinc finger transcription factor family protein | chr1:3346677-3347763 REVERSE LENGTH=190	1	1	1	>AT1G10200.1 | Symbols: WLIM1 | GATA type zinc finger transcription factor family protein | chr1:3346677-3347763 REVERSE LENGTH=190	1	1	1	1	1	1	1	1	1	1	1	1	1	1	1	1	7.9	7.9	7.9	21.04	190	190	1	1	1	1	3.4137e-06	7.9	7.9	7.9	7.9	457140000	171260000	150380000	135490000	0	0	0	148710000	0	1	0	1	0
>AT1G10270.1 | Symbols: GRP23 | glutamine-rich protein 23 | chr1:3363535-3366276 FORWARD LENGTH=913	>AT1G10270.1 | Symbols: GRP23 | glutamine-rich protein 23 | chr1:3363535-3366276 FORWARD LENGTH=913	1	1	1	>AT1G10270.1 | Symbols: GRP23 | glutamine-rich protein 23 | chr1:3363535-3366276 FORWARD LENGTH=913	1	1	1	1	1	1	1	1	1	1	1	1	1	1	1	1	1.5	1.5	1.5	102.09	913	913	1	1	1	1	1.213e-08	1.5	1.5	1.5	1.5	125730000	45154000	38349000	18093000	24133000	0	0	0	30317000	0	1	1	0
>AT1G10290.1 | Symbols: ADL6, DRP2A | dynamin-like protein 6 | chr1:3370774-3377120 FORWARD LENGTH=914	>AT1G10290.1 | Symbols: ADL6, DRP2A | dynamin-like protein 6 | chr1:3370774-3377120 FORWARD LENGTH=914	28	28	13	>AT1G10290.1 | Symbols: ADL6, DRP2A | dynamin-like protein 6 | chr1:3370774-3377120 FORWARD LENGTH=914	1	28	28	13	21	25	27	25	21	25	27	25	11	11	12	12	36.4	36.4	19.7	99.165	914	914	26	27	28	25	3.1529e-249	29.3	32.4	35.1	33.9	10288000000	2719900000	2998400000	2377700000	2192400000	3136100000	3064700000	2406700000	2702900000	22	23	23	22
>AT1G10370.1 | Symbols: GST30, ATGSTU17, GST30B, ERD9 | Glutathione S-transferase family protein | chr1:3397274-3398273 REVERSE LENGTH=227	>AT1G10370.1 | Symbols: GST30, ATGSTU17, GST30B, ERD9 | Glutathione S-transferase family protein | chr1:3397274-3398273 REVERSE LENGTH=227	3	3	3	>AT1G10370.1 | Symbols: GST30, ATGSTU17, GST30B, ERD9 | Glutathione S-transferase family protein | chr1:3397274-3398273 REVERSE LENGTH=227	1	3	3	3	0	2	2	1	0	2	2	1	0	2	2	1	16.7	16.7	16.7	25.307	227	227		2	2	1	1.7117e-10	0	12.8	10.6	6.6	310630000	0	155370000	84511000	70753000	0	175930000	0	0	0	2	2	1
>AT1G10430.1 | Symbols: PP2A-2 | protein phosphatase 2A-2 | chr1:3428705-3430437 REVERSE LENGTH=306	>AT1G10430.1 | Symbols: PP2A-2 | protein phosphatase 2A-2 | chr1:3428705-3430437 REVERSE LENGTH=306	7	6	2	>AT1G10430.1 | Symbols: PP2A-2 | protein phosphatase 2A-2 | chr1:3428705-3430437 REVERSE LENGTH=306	1	7	6	2	1	2	6	6	1	2	5	5	0	0	2	2	35	32.4	10.5	34.934	306	306	1	3	6	5	3.6366e-37	4.2	10.5	28.8	30.4	1857600000	207540000	375780000	641810000	632490000	0	584270000	604650000	730310000	1	2	6	4
>AT1G10490.1 | Symbols: | Domain of unknown function (DUF1726) ;Putative ATPase (DUF699) | chr1:3453589-3459925 FORWARD LENGTH=1028;>AT3G57940.2 | Symbols: | Domain of unknown function (DUF1726) ;Putative ATPase (DUF699) | chr3:21449560-21455834 FORWARD LENGTH=1023;>AT3G57940.1 | Symbols: | Domain of unknown function (DUF1726) ;Putative ATPase (DUF699) | chr3:21449560-21455834 FORWARD LENGTH=1028	>AT1G10490.1 | Symbols: | Domain of unknown function (DUF1726) ;Putative ATPase (DUF699) | chr1:3453589-3459925 FORWARD LENGTH=1028	3;1;1	3;1;1	3;1;1	>AT1G10490.1 | Symbols: | Domain of unknown function (DUF1726) ;Putative ATPase (DUF699) | chr1:3453589-3459925 FORWARD LENGTH=1028	3	3	3	3	3	3	2	2	3	3	2	2	3	3	2	2	4.1	4.1	4.1	115.62	1028	1028;1023;1028	3	3	2	2	2.858e-10	4.1	4.1	3.1	3.1	177600000	72434000	54590000	27818000	22763000	47630000	43525000	51356000	50865000	1	1	1	2
>AT1G10510.1 | Symbols: emb2004 | RNI-like superfamily protein | chr1:3461771-3465590 FORWARD LENGTH=605	>AT1G10510.1 | Symbols: emb2004 | RNI-like superfamily protein | chr1:3461771-3465590 FORWARD LENGTH=605	2	2	2	>AT1G10510.1 | Symbols: emb2004 | RNI-like superfamily protein | chr1:3461771-3465590 FORWARD LENGTH=605	1	2	2	2	1	2	1	1	1	2	1	1	1	2	1	1	4.8	4.8	4.8	64.722	605	605	1	2	1	1	7.8206e-06	2.3	4.8	2.3	2.3	302130000	86851000	139670000	36843000	38764000	0	158160000	0	0	0	1	0	1
>AT1G10590.2 | Symbols: | Nucleic acid-binding, OB-fold-like protein | chr1:3502324-3502991 REVERSE LENGTH=139;>AT1G10590.1 | Symbols: | Nucleic acid-binding, OB-fold-like protein | chr1:3502324-3502991 REVERSE LENGTH=139;>AT1G10590.3 | Symbols: | Nucleic acid-binding, OB-fold-like protein | chr1:3502324-3503033 REVERSE LENGTH=153	>AT1G10590.2 | Symbols: | Nucleic acid-binding, OB-fold-like protein | chr1:3502324-3502991 REVERSE LENGTH=139;>AT1G10590.1 | Symbols: | Nucleic acid-binding, OB-fold-like protein | chr1:3502324-3502991 REVERSE LENGTH=139;>AT1G10590.3 | Symbols: | Nucleic acid-binding, OB-fold-like protein | chr1:3502324-3503033 REVERSE LENGTH=153	1;1;1	1;1;1	1;1;1	>AT1G10590.2 | Symbols: | Nucleic acid-binding, OB-fold-like protein | chr1:3502324-3502991 REVERSE LENGTH=139;>AT1G10590.1 | Symbols: | Nucleic acid-binding, OB-fold-like protein | chr1:3502324-3502991 REVERSE LENGTH=139;>AT1G10590.3 | Symbols: | Nucle	3	1	1	1	1	1	1	1	1	1	1	1	1	1	1	1	9.4	9.4	9.4	15.455	139	139;139;153	1	1	1	1	6.9568e-11	9.4	9.4	9.4	9.4	723110000	190320000	253860000	159480000	119450000	0	0	0	150060000	1	1	1	1
>AT2G47170.1 | Symbols: ARF1A1C | Ras-related small GTP-binding family protein | chr2:19367264-19368518 FORWARD LENGTH=181;>AT1G10630.1 | Symbols: ATARFA1F, ARFA1F | ADP-ribosylation factor A1F | chr1:3513189-3514230 REVERSE LENGTH=181;>AT3G62290.3 | Symbols: ARFA1E | ADP-ribosylation factor A1E | chr3:23052287-23053545 FORWARD LENGTH=181;>AT3G62290.2 | Symbols: ARFA1E | ADP-ribosylation factor A…	>AT2G47170.1 | Symbols: ARF1A1C | Ras-related small GTP-binding family protein | chr2:19367264-19368518 FORWARD LENGTH=181;>AT1G10630.1 | Symbols: ATARFA1F, ARFA1F | ADP-ribosylation factor A1F | chr1:3513189-3514230 REVERSE LENGTH=181;>AT3G62290.3 | Symbols: ARFA1E | ADP-ribosylation factor A1E | chr3:23052287-23053545 FORWARD LENGTH=181;>AT3G62290.2 | Symbols: ARFA1E | ADP-ribosylation factor A…	11;11;10;10;10;10	1;1;0;0;0;0	1;1;0;0;0;0	>AT2G47170.1 | Symbols: ARF1A1C | Ras-related small GTP-binding family protein | chr2:19367264-19368518 FORWARD LENGTH=181;>AT1G10630.1 | Symbols: ATARFA1F, ARFA1F | ADP-ribosylation factor A1F | chr1:3513189-3514230 REVERSE LENGTH=181;>AT3G62290.3 | Symbo	6	11	1	1	8	8	11	11	0	0	1	1	0	0	1	1	73.5	16	16	20.608	181	181;181;181;181;181;188			1	1	2.5407e-94	47.5	47.5	73.5	73.5	38493000	0	0	25569000	12924000	0	0	0	16235000	0	0	1	0
>AT1G10670.4 | Symbols: ACLA-1 | ATP-citrate lyase A-1 | chr1:3535787-3538098 FORWARD LENGTH=423;>AT1G10670.2 | Symbols: ACLA-1 | ATP-citrate lyase A-1 | chr1:3535787-3538098 FORWARD LENGTH=423;>AT1G10670.1 | Symbols: ACLA-1 | ATP-citrate lyase A-1 | chr1:3535787-3538098 FORWARD LENGTH=423;>AT1G10670.3 | Symbols: ACLA-1 | ATP-citrate lyase A-1 | chr1:3535787-3538098 FORWARD LENGTH=443	>AT1G10670.4 | Symbols: ACLA-1 | ATP-citrate lyase A-1 | chr1:3535787-3538098 FORWARD LENGTH=423;>AT1G10670.2 | Symbols: ACLA-1 | ATP-citrate lyase A-1 | chr1:3535787-3538098 FORWARD LENGTH=423;>AT1G10670.1 | Symbols: ACLA-1 | ATP-citrate lyase A-1 | chr1:3535787-3538098 FORWARD LENGTH=423;>AT1G10670.3 | Symbols: ACLA-1 | ATP-citrate lyase A-1 | chr1:3535787-3538098 FORWARD LENGTH=443	12;12;12;11	12;12;12;11	7;7;7;6	>AT1G10670.4 | Symbols: ACLA-1 | ATP-citrate lyase A-1 | chr1:3535787-3538098 FORWARD LENGTH=423;>AT1G10670.2 | Symbols: ACLA-1 | ATP-citrate lyase A-1 | chr1:3535787-3538098 FORWARD LENGTH=423;>AT1G10670.1 | Symbols: ACLA-1 | ATP-citrate lyase A-1 | chr1:	4	12	12	7	11	11	12	12	11	11	12	12	6	6	7	7	44.9	44.9	31.9	46.678	423	423;423;423;443	12	13	16	14	1.4195e-63	38.8	38.8	44.9	44.9	7361400000	1827900000	1868800000	1869000000	1795700000	1843300000	2072600000	2091200000	2209700000	13	9	11	12
>AT1G10700.1 | Symbols: PRS3 | phosphoribosyl pyrophosphate (PRPP) synthase 3 | chr1:3554157-3556274 FORWARD LENGTH=411	>AT1G10700.1 | Symbols: PRS3 | phosphoribosyl pyrophosphate (PRPP) synthase 3 | chr1:3554157-3556274 FORWARD LENGTH=411	4	4	4	>AT1G10700.1 | Symbols: PRS3 | phosphoribosyl pyrophosphate (PRPP) synthase 3 | chr1:3554157-3556274 FORWARD LENGTH=411	1	4	4	4	2	3	4	4	2	3	4	4	2	3	4	4	16.3	16.3	16.3	44.696	411	411	2	3	4	4	7.0831e-20	9.2	13.4	16.3	16.3	459060000	110240000	98936000	142940000	106940000	152960000	105190000	132760000	122590000	2	2	3	2
>AT1G10760.1 | Symbols: SEX1, SOP1, SOP, GWD1, GWD | Pyruvate phosphate dikinase, PEP/pyruvate binding domain | chr1:3581210-3590043 REVERSE LENGTH=1399;>AT4G24450.1 | Symbols: GWD3, PWD, ATGWD2 | phosphoglucan, water dikinase | chr4:12635761-12642631 FORWARD LENGTH=1278	>AT1G10760.1 | Symbols: SEX1, SOP1, SOP, GWD1, GWD | Pyruvate phosphate dikinase, PEP/pyruvate binding domain | chr1:3581210-3590043 REVERSE LENGTH=1399	9;1	9;1	9;1	>AT1G10760.1 | Symbols: SEX1, SOP1, SOP, GWD1, GWD | Pyruvate phosphate dikinase, PEP/pyruvate binding domain | chr1:3581210-3590043 REVERSE LENGTH=1399	2	9	9	9	9	9	6	5	9	9	6	5	9	9	6	5	9.4	9.4	9.4	156.58	1399	1399;1278	11	9	6	5	1.9105e-46	9.4	9.4	6.4	5.5	1105300000	462930000	349660000	170590000	122170000	338250000	324360000	220140000	260970000	7	9	3	3
>AT1G10840.1 | Symbols: TIF3H1 | translation initiation factor 3 subunit H1 | chr1:3607885-3610299 REVERSE LENGTH=337;>AT1G10840.2 | Symbols: TIF3H1 | translation initiation factor 3 subunit H1 | chr1:3607885-3609657 REVERSE LENGTH=250	>AT1G10840.1 | Symbols: TIF3H1 | translation initiation factor 3 subunit H1 | chr1:3607885-3610299 REVERSE LENGTH=337;>AT1G10840.2 | Symbols: TIF3H1 | translation initiation factor 3 subunit H1 | chr1:3607885-3609657 REVERSE LENGTH=250	7;6	7;6	7;6	>AT1G10840.1 | Symbols: TIF3H1 | translation initiation factor 3 subunit H1 | chr1:3607885-3610299 REVERSE LENGTH=337;>AT1G10840.2 | Symbols: TIF3H1 | translation initiation factor 3 subunit H1 | chr1:3607885-3609657 REVERSE LENGTH=250	2	7	7	7	5	5	7	6	5	5	7	6	5	5	7	6	24.6	24.6	24.6	38.372	337	337;250	6	6	7	7	2.6987e-27	15.1	16	24.6	20.5	1357300000	412240000	364070000	288450000	292510000	453990000	417190000	293760000	343590000	4	4	7	5
>AT1G10850.1 | Symbols: | Leucine-rich repeat protein kinase family protein | chr1:3612228-3614343 FORWARD LENGTH=663	>AT1G10850.1 | Symbols: | Leucine-rich repeat protein kinase family protein | chr1:3612228-3614343 FORWARD LENGTH=663	1	1	1	>AT1G10850.1 | Symbols: | Leucine-rich repeat protein kinase family protein | chr1:3612228-3614343 FORWARD LENGTH=663	1	1	1	1	1	0	0	1	1	0	0	1	1	0	0	1	2.3	2.3	2.3	72.737	663	663	1			1	0.0043982	2.3	0	0	2.3	61645000	40078000	0	0	21568000	0	0	0	27094000	0	0	0	1
>AT1G10940.1 | Symbols: ASK1, SNRK2-4, SNRK2.4, SRK2A | Protein kinase superfamily protein | chr1:3656050-3658170 REVERSE LENGTH=363;>AT1G10940.2 | Symbols: | Protein kinase superfamily protein | chr1:3656050-3658170 REVERSE LENGTH=371	>AT1G10940.1 | Symbols: ASK1, SNRK2-4, SNRK2.4, SRK2A | Protein kinase superfamily protein | chr1:3656050-3658170 REVERSE LENGTH=363;>AT1G10940.2 | Symbols: | Protein kinase superfamily protein | chr1:3656050-3658170 REVERSE LENGTH=371	6;6	4;4	2;2	>AT1G10940.1 | Symbols: ASK1, SNRK2-4, SNRK2.4, SRK2A | Protein kinase superfamily protein | chr1:3656050-3658170 REVERSE LENGTH=363;>AT1G10940.2 | Symbols: | Protein kinase superfamily protein | chr1:3656050-3658170 REVERSE LENGTH=371	2	6	4	2	6	6	6	6	4	4	4	4	2	2	2	2	18.2	13.8	7.4	41.168	363	363;371	4	4	4	4	2.5218e-61	18.2	18.2	18.2	18.2	1788700000	599280000	474670000	347610000	367130000	596440000	576010000	341520000	465520000	2	2	3	2
>AT1G10950.1 | Symbols: TMN1, AtTMN1 | transmembrane nine 1 | chr1:3659322-3663622 FORWARD LENGTH=589	>AT1G10950.1 | Symbols: TMN1, AtTMN1 | transmembrane nine 1 | chr1:3659322-3663622 FORWARD LENGTH=589	8	7	7	>AT1G10950.1 | Symbols: TMN1, AtTMN1 | transmembrane nine 1 | chr1:3659322-3663622 FORWARD LENGTH=589	1	8	7	7	7	6	7	8	6	6	6	7	6	6	6	7	16	14.6	14.6	66.892	589	589	7	8	8	9	5.2227e-36	12.6	11.2	12.6	16	4030500000	1018600000	859990000	1054200000	1097800000	1075200000	1052200000	1279700000	987790000	3	5	7	8
>AT1G11260.1 | Symbols: STP1, ATSTP1 | sugar transporter 1 | chr1:3777460-3780133 FORWARD LENGTH=522	>AT1G11260.1 | Symbols: STP1, ATSTP1 | sugar transporter 1 | chr1:3777460-3780133 FORWARD LENGTH=522	5	5	5	>AT1G11260.1 | Symbols: STP1, ATSTP1 | sugar transporter 1 | chr1:3777460-3780133 FORWARD LENGTH=522	1	5	5	5	4	4	5	5	4	4	5	5	4	4	5	5	12.6	12.6	12.6	57.61	522	522	4	5	5	5	2.4413e-33	9.8	9.8	12.6	12.6	1910000000	649970000	409030000	436370000	414620000	661030000	522490000	441660000	464100000	4	3	4	5
>AT1G11310.2 | Symbols: MLO2, ATMLO2, PMR2 | Seven transmembrane MLO family protein | chr1:3801546-3803870 REVERSE LENGTH=418;>AT1G11310.1 | Symbols: MLO2, ATMLO2, PMR2 | Seven transmembrane MLO family protein | chr1:3800899-3803870 REVERSE LENGTH=573	>AT1G11310.2 | Symbols: MLO2, ATMLO2, PMR2 | Seven transmembrane MLO family protein | chr1:3801546-3803870 REVERSE LENGTH=418;>AT1G11310.1 | Symbols: MLO2, ATMLO2, PMR2 | Seven transmembrane MLO family protein | chr1:3800899-3803870 REVERSE LENGTH=573	1;1	1;1	1;1	>AT1G11310.2 | Symbols: MLO2, ATMLO2, PMR2 | Seven transmembrane MLO family protein | chr1:3801546-3803870 REVERSE LENGTH=418;>AT1G11310.1 | Symbols: MLO2, ATMLO2, PMR2 | Seven transmembrane MLO family protein | chr1:3800899-3803870 REVERSE LENGTH=573	2	1	1	1	1	1	1	1	1	1	1	1	1	1	1	1	2.9	2.9	2.9	48.139	418	418;573	1	1	1	1	4.5155e-06	2.9	2.9	2.9	2.9	149270000	27415000	36082000	49796000	35981000	0	0	0	45201000	0	1	0	0
>AT1G11320.1 | Symbols: | unknown protein; FUNCTIONS IN: molecular_function unknown; INVOLVED IN: biological_process unknown; LOCATED IN: mitochondrion, plastid; EXPRESSED IN: 7 plant structures; EXPRESSED DURING: C globular stage, F mature embryo stage, petal differentiation and expansion stage, E expanded cotyledon stage, D bilateral stage; Has 46 Blast hits to 46 proteins in 14 species: Archae…	>AT1G11320.1 | Symbols: | unknown protein; FUNCTIONS IN: molecular_function unknown; INVOLVED IN: biological_process unknown; LOCATED IN: mitochondrion, plastid; EXPRESSED IN: 7 plant structures; EXPRESSED DURING: C globular stage, F mature embryo stage, petal differentiation and expansion stage, E expanded cotyledon stage, D bilateral stage; Has 46 Blast hits to 46 proteins in 14 species: Archae…	1	1	1	>AT1G11320.1 | Symbols: | unknown protein; FUNCTIONS IN: molecular_function unknown; INVOLVED IN: biological_process unknown; LOCATED IN: mitochondrion, plastid; EXPRESSED IN: 7 plant structures; EXPRESSED DURING: C globular stage, F mature embryo stage,	1	1	1	1	0	1	0	0	0	1	0	0	0	1	0	0	2.8	2.8	2.8	46.891	424	424		1			0.0052342	0	2.8	0	0	0	0	0	0	0	0	0	0	0	0	0	0	0
>AT1G11360.4 | Symbols: | Adenine nucleotide alpha hydrolases-like superfamily protein | chr1:3822171-3822899 REVERSE LENGTH=242;>AT1G11360.3 | Symbols: | Adenine nucleotide alpha hydrolases-like superfamily protein | chr1:3822171-3822899 REVERSE LENGTH=242;>AT1G11360.2 | Symbols: | Adenine nucleotide alpha hydrolases-like superfamily protein | chr1:3822171-3822899 REVERSE LENGTH=242;>AT1G11360.1…	>AT1G11360.4 | Symbols: | Adenine nucleotide alpha hydrolases-like superfamily protein | chr1:3822171-3822899 REVERSE LENGTH=242;>AT1G11360.3 | Symbols: | Adenine nucleotide alpha hydrolases-like superfamily protein | chr1:3822171-3822899 REVERSE LENGTH=242;>AT1G11360.2 | Symbols: | Adenine nucleotide alpha hydrolases-like superfamily protein | chr1:3822171-3822899 REVERSE LENGTH=242;>AT1G11360.1…	1;1;1;1	1;1;1;1	1;1;1;1	>AT1G11360.4 | Symbols: | Adenine nucleotide alpha hydrolases-like superfamily protein | chr1:3822171-3822899 REVERSE LENGTH=242;>AT1G11360.3 | Symbols: | Adenine nucleotide alpha hydrolases-like superfamily protein | chr1:3822171-3822899 REVERSE LENGTH=	4	1	1	1	1	1	1	1	1	1	1	1	1	1	1	1	5	5	5	26.508	242	242;242;242;242	1	1	1	2	4.3736e-09	5	5	5	5	185030000	69976000	51893000	26031000	37135000	0	0	0	23325000	0	1	0	1
>AT1G11475.1 | Symbols: NRPB10, NRPD10, NRPE10 | RNA polymerases N / 8 kDa subunit | chr1:3862520-3863805 FORWARD LENGTH=71;>AT1G61700.1 | Symbols: | RNA polymerases N / 8 kDa subunit | chr1:22787105-22788112 FORWARD LENGTH=71	>AT1G11475.1 | Symbols: NRPB10, NRPD10, NRPE10 | RNA polymerases N / 8 kDa subunit | chr1:3862520-3863805 FORWARD LENGTH=71;>AT1G61700.1 | Symbols: | RNA polymerases N / 8 kDa subunit | chr1:22787105-22788112 FORWARD LENGTH=71	2;1	2;1	2;1	>AT1G11475.1 | Symbols: NRPB10, NRPD10, NRPE10 | RNA polymerases N / 8 kDa subunit | chr1:3862520-3863805 FORWARD LENGTH=71;>AT1G61700.1 | Symbols: | RNA polymerases N / 8 kDa subunit | chr1:22787105-22788112 FORWARD LENGTH=71	2	2	2	2	1	1	1	2	1	1	1	2	1	1	1	2	28.2	28.2	28.2	8.3146	71	71;71	1	1	1	2	4.3686e-07	12.7	12.7	15.5	28.2	260670000	86680000	67890000	31428000	74670000	0	0	0	93804000	0	0	1	1
>AT1G11580.1 | Symbols: ATPMEPCRA, PMEPCRA | methylesterase PCR A | chr1:3888730-3890649 FORWARD LENGTH=557	>AT1G11580.1 | Symbols: ATPMEPCRA, PMEPCRA | methylesterase PCR A | chr1:3888730-3890649 FORWARD LENGTH=557	7	7	7	>AT1G11580.1 | Symbols: ATPMEPCRA, PMEPCRA | methylesterase PCR A | chr1:3888730-3890649 FORWARD LENGTH=557	1	7	7	7	7	6	7	6	7	6	7	6	7	6	7	6	14.7	14.7	14.7	61.687	557	557	8	7	8	9	6.1196e-178	14.7	12.7	14.7	12.9	6777900000	2066500000	1606700000	1641200000	1463400000	2133400000	2132800000	1463400000	1781200000	2	3	6	5
>AT1G11650.1 | Symbols: ATRBP45B, RBP45B | RNA-binding (RRM/RBD/RNP motifs) family protein | chr1:3914895-3917301 FORWARD LENGTH=306;>AT1G11650.2 | Symbols: ATRBP45B, RBP45B | RNA-binding (RRM/RBD/RNP motifs) family protein | chr1:3914895-3917941 FORWARD LENGTH=405	>AT1G11650.1 | Symbols: ATRBP45B, RBP45B | RNA-binding (RRM/RBD/RNP motifs) family protein | chr1:3914895-3917301 FORWARD LENGTH=306;>AT1G11650.2 | Symbols: ATRBP45B, RBP45B | RNA-binding (RRM/RBD/RNP motifs) family protein | chr1:3914895-3917941 FORWARD LENGTH=405	5;5	5;5	5;5	>AT1G11650.1 | Symbols: ATRBP45B, RBP45B | RNA-binding (RRM/RBD/RNP motifs) family protein | chr1:3914895-3917301 FORWARD LENGTH=306;>AT1G11650.2 | Symbols: ATRBP45B, RBP45B | RNA-binding (RRM/RBD/RNP motifs) family protein | chr1:3914895-3917941 FORWARD L	2	5	5	5	3	4	5	4	3	4	5	4	3	4	5	4	19.9	19.9	19.9	33.43	306	306;405	5	5	6	6	1.0106e-48	13.4	17	19.9	17	1129300000	354900000	301380000	272220000	200800000	361680000	390360000	247130000	248030000	5	3	3	2
>AT1G11660.1 | Symbols: | heat shock protein 70 (Hsp 70) family protein | chr1:3921056-3924347 FORWARD LENGTH=763	>AT1G11660.1 | Symbols: | heat shock protein 70 (Hsp 70) family protein | chr1:3921056-3924347 FORWARD LENGTH=763	9	9	9	>AT1G11660.1 | Symbols: | heat shock protein 70 (Hsp 70) family protein | chr1:3921056-3924347 FORWARD LENGTH=763	1	9	9	9	8	7	9	8	8	7	9	8	8	7	9	8	16.8	16.8	16.8	85.219	763	763	11	9	11	10	8.071e-82	14.4	11.9	16.8	13.8	1712400000	487260000	270490000	531460000	423210000	356840000	400830000	583800000	525650000	5	6	8	11
>AT1G11670.1 | Symbols: | MATE efflux family protein | chr1:3928520-3931482 REVERSE LENGTH=503;>AT1G61890.1 | Symbols: | MATE efflux family protein | chr1:22868103-22871163 REVERSE LENGTH=501;>AT3G59030.1 | Symbols: TT12, ATTT12 | MATE efflux family protein | chr3:21819124-21821288 FORWARD LENGTH=507	>AT1G11670.1 | Symbols: | MATE efflux family protein | chr1:3928520-3931482 REVERSE LENGTH=503;>AT1G61890.1 | Symbols: | MATE efflux family protein | chr1:22868103-22871163 REVERSE LENGTH=501;>AT3G59030.1 | Symbols: TT12, ATTT12 | MATE efflux family protein | chr3:21819124-21821288 FORWARD LENGTH=507	2;1;1	2;1;1	2;1;1	>AT1G11670.1 | Symbols: | MATE efflux family protein | chr1:3928520-3931482 REVERSE LENGTH=503;>AT1G61890.1 | Symbols: | MATE efflux family protein | chr1:22868103-22871163 REVERSE LENGTH=501;>AT3G59030.1 | Symbols: TT12, ATTT12 | MATE efflux family prot	3	2	2	2	2	2	0	0	2	2	0	0	2	2	0	0	4.8	4.8	4.8	54.994	503	503;501;507	2	2			3.0281e-14	4.8	4.8	0	0	231760000	130550000	101210000	0	0	133810000	111340000	0	0	1	2	0	0
>AT1G11680.1 | Symbols: CYP51G1, EMB1738, CYP51A2, CYP51 | CYTOCHROME P450 51G1 | chr1:3938925-3940585 FORWARD LENGTH=488	>AT1G11680.1 | Symbols: CYP51G1, EMB1738, CYP51A2, CYP51 | CYTOCHROME P450 51G1 | chr1:3938925-3940585 FORWARD LENGTH=488	6	6	6	>AT1G11680.1 | Symbols: CYP51G1, EMB1738, CYP51A2, CYP51 | CYTOCHROME P450 51G1 | chr1:3938925-3940585 FORWARD LENGTH=488	1	6	6	6	3	3	6	5	3	3	6	5	3	3	6	5	15.4	15.4	15.4	55.494	488	488	4	3	8	6	2.5268e-18	7	7	15.4	12.7	1023300000	168400000	132740000	448100000	274030000	293570000	275020000	252240000	220250000	6	0	7	4
>AT1G11750.1 | Symbols: CLPP6, NCLPP1, NCLPP6 | CLP protease proteolytic subunit 6 | chr1:3967609-3969535 FORWARD LENGTH=271;>AT1G11750.2 | Symbols: CLPP6 | CLP protease proteolytic subunit 6 | chr1:3967609-3969535 FORWARD LENGTH=289	>AT1G11750.1 | Symbols: CLPP6, NCLPP1, NCLPP6 | CLP protease proteolytic subunit 6 | chr1:3967609-3969535 FORWARD LENGTH=271;>AT1G11750.2 | Symbols: CLPP6 | CLP protease proteolytic subunit 6 | chr1:3967609-3969535 FORWARD LENGTH=289	4;4	4;4	4;4	>AT1G11750.1 | Symbols: CLPP6, NCLPP1, NCLPP6 | CLP protease proteolytic subunit 6 | chr1:3967609-3969535 FORWARD LENGTH=271;>AT1G11750.2 | Symbols: CLPP6 | CLP protease proteolytic subunit 6 | chr1:3967609-3969535 FORWARD LENGTH=289	2	4	4	4	3	3	4	3	3	3	4	3	3	3	4	3	26.2	26.2	26.2	29.382	271	271;289	5	5	7	3	2.6332e-32	19.6	19.6	26.2	19.6	820040000	301930000	273890000	170310000	73900000	259290000	343080000	106090000	144490000	4	3	3	2
>AT1G11820.1 | Symbols: | O-Glycosyl hydrolases family 17 protein | chr1:3991259-3993327 REVERSE LENGTH=384;>AT1G11820.2 | Symbols: | O-Glycosyl hydrolases family 17 protein | chr1:3991144-3993327 REVERSE LENGTH=511	>AT1G11820.1 | Symbols: | O-Glycosyl hydrolases family 17 protein | chr1:3991259-3993327 REVERSE LENGTH=384;>AT1G11820.2 | Symbols: | O-Glycosyl hydrolases family 17 protein | chr1:3991144-3993327 REVERSE LENGTH=511	2;2	2;2	2;2	>AT1G11820.1 | Symbols: | O-Glycosyl hydrolases family 17 protein | chr1:3991259-3993327 REVERSE LENGTH=384;>AT1G11820.2 | Symbols: | O-Glycosyl hydrolases family 17 protein | chr1:3991144-3993327 REVERSE LENGTH=511	2	2	2	2	1	1	1	0	1	1	1	0	1	1	1	0	14.6	14.6	14.6	42.348	384	384;511	1	1	1		0.0042213	7.6	7.6	7	0	75260000	31910000	35450000	7899800	0	0	40142000	0	0	1	0	1	0
>AT1G11840.4 | Symbols: ATGLX1, GLX1 | glyoxalase I homolog | chr1:3996045-3997518 FORWARD LENGTH=283;>AT1G11840.3 | Symbols: ATGLX1, GLX1 | glyoxalase I homolog | chr1:3996045-3997518 FORWARD LENGTH=283;>AT1G11840.2 | Symbols: ATGLX1, GLX1 | glyoxalase I homolog | chr1:3996045-3997518 FORWARD LENGTH=283;>AT1G11840.1 | Symbols: ATGLX1, GLX1 | glyoxalase I homolog | chr1:3996045-3997518 FORWARD LE…	>AT1G11840.4 | Symbols: ATGLX1, GLX1 | glyoxalase I homolog | chr1:3996045-3997518 FORWARD LENGTH=283;>AT1G11840.3 | Symbols: ATGLX1, GLX1 | glyoxalase I homolog | chr1:3996045-3997518 FORWARD LENGTH=283;>AT1G11840.2 | Symbols: ATGLX1, GLX1 | glyoxalase I homolog | chr1:3996045-3997518 FORWARD LENGTH=283;>AT1G11840.1 | Symbols: ATGLX1, GLX1 | glyoxalase I homolog | chr1:3996045-3997518 FORWARD LE…	10;10;10;10;9;5;1;1	10;10;10;10;9;5;1;1	10;10;10;10;9;5;1;1	>AT1G11840.4 | Symbols: ATGLX1, GLX1 | glyoxalase I homolog | chr1:3996045-3997518 FORWARD LENGTH=283;>AT1G11840.3 | Symbols: ATGLX1, GLX1 | glyoxalase I homolog | chr1:3996045-3997518 FORWARD LENGTH=283;>AT1G11840.2 | Symbols: ATGLX1, GLX1 | glyoxalase I	8	10	10	10	8	10	10	9	8	10	10	9	8	10	10	9	39.6	39.6	39.6	31.928	283	283;283;283;283;322;232;262;350	11	12	12	12	3.2698e-63	32.9	39.6	39.6	33.9	11832000000	2614300000	2449500000	3832600000	2936000000	2683600000	2752700000	4529000000	3238900000	11	11	15	14
>AT1G11860.3 | Symbols: | Glycine cleavage T-protein family | chr1:4001801-4003245 FORWARD LENGTH=408;>AT1G11860.2 | Symbols: | Glycine cleavage T-protein family | chr1:4001801-4003245 FORWARD LENGTH=408;>AT1G11860.1 | Symbols: | Glycine cleavage T-protein family | chr1:4001801-4003245 FORWARD LENGTH=408	>AT1G11860.3 | Symbols: | Glycine cleavage T-protein family | chr1:4001801-4003245 FORWARD LENGTH=408;>AT1G11860.2 | Symbols: | Glycine cleavage T-protein family | chr1:4001801-4003245 FORWARD LENGTH=408;>AT1G11860.1 | Symbols: | Glycine cleavage T-protein family | chr1:4001801-4003245 FORWARD LENGTH=408	8;8;8	8;8;8	8;8;8	>AT1G11860.3 | Symbols: | Glycine cleavage T-protein family | chr1:4001801-4003245 FORWARD LENGTH=408;>AT1G11860.2 | Symbols: | Glycine cleavage T-protein family | chr1:4001801-4003245 FORWARD LENGTH=408;>AT1G11860.1 | Symbols: | Glycine cleavage T-prot	3	8	8	8	5	5	8	6	5	5	8	6	5	5	8	6	26.7	26.7	26.7	44.444	408	408;408;408	6	5	10	7	5.774e-34	20.6	20.6	26.7	17.9	2507500000	768270000	531810000	729230000	478210000	569630000	627020000	689750000	646250000	5	4	7	7
>AT1G11870.1 | Symbols: ATSRS, OVA7, SRS | Seryl-tRNA synthetase | chr1:4003895-4006556 FORWARD LENGTH=512;>AT1G11870.2 | Symbols: ATSRS, SRS | Seryl-tRNA synthetase | chr1:4003895-4006556 FORWARD LENGTH=514	>AT1G11870.1 | Symbols: ATSRS, OVA7, SRS | Seryl-tRNA synthetase | chr1:4003895-4006556 FORWARD LENGTH=512;>AT1G11870.2 | Symbols: ATSRS, SRS | Seryl-tRNA synthetase | chr1:4003895-4006556 FORWARD LENGTH=514	1;1	1;1	1;1	>AT1G11870.1 | Symbols: ATSRS, OVA7, SRS | Seryl-tRNA synthetase | chr1:4003895-4006556 FORWARD LENGTH=512;>AT1G11870.2 | Symbols: ATSRS, SRS | Seryl-tRNA synthetase | chr1:4003895-4006556 FORWARD LENGTH=514	2	1	1	1	0	1	0	0	0	1	0	0	0	1	0	0	2.9	2.9	2.9	57.181	512	512;514		1			7.3575e-13	0	2.9	0	0	0	0	0	0	0	0	0	0	0	0	0	0	0
>AT1G11890.1 | Symbols: SEC22, ATSEC22 | Synaptobrevin family protein | chr1:4011509-4012835 FORWARD LENGTH=218	>AT1G11890.1 | Symbols: SEC22, ATSEC22 | Synaptobrevin family protein | chr1:4011509-4012835 FORWARD LENGTH=218	5	5	5	>AT1G11890.1 | Symbols: SEC22, ATSEC22 | Synaptobrevin family protein | chr1:4011509-4012835 FORWARD LENGTH=218	1	5	5	5	3	2	5	4	3	2	5	4	3	2	5	4	30.7	30.7	30.7	25.332	218	218	3	3	6	5	1.323e-22	16.1	11	30.7	26.1	710130000	220290000	155680000	174780000	159380000	237660000	190590000	164890000	195480000	2	1	3	2
>AT1G11905.2 | Symbols: | B-cell receptor-associated protein 31-like | chr1:4014958-4016222 FORWARD LENGTH=220;>AT1G11905.1 | Symbols: | B-cell receptor-associated protein 31-like | chr1:4014958-4016222 FORWARD LENGTH=221	>AT1G11905.2 | Symbols: | B-cell receptor-associated protein 31-like | chr1:4014958-4016222 FORWARD LENGTH=220;>AT1G11905.1 | Symbols: | B-cell receptor-associated protein 31-like | chr1:4014958-4016222 FORWARD LENGTH=221	2;2	2;2	2;2	>AT1G11905.2 | Symbols: | B-cell receptor-associated protein 31-like | chr1:4014958-4016222 FORWARD LENGTH=220;>AT1G11905.1 | Symbols: | B-cell receptor-associated protein 31-like | chr1:4014958-4016222 FORWARD LENGTH=221	2	2	2	2	2	2	1	2	2	2	1	2	2	2	1	2	12.3	12.3	12.3	25.382	220	220;221	2	2	1	2	2.45e-11	12.3	12.3	4.5	12.3	332380000	109050000	116770000	0	106550000	0	129170000	0	136910000	0	2	0	1
>AT1G11910.1 | Symbols: APA1, ATAPA1 | aspartic proteinase A1 | chr1:4017119-4019874 REVERSE LENGTH=506;>AT1G62290.2 | Symbols: | Saposin-like aspartyl protease family protein | chr1:23010107-23012681 REVERSE LENGTH=513;>AT1G62290.1 | Symbols: | Saposin-like aspartyl protease family protein | chr1:23010107-23012681 REVERSE LENGTH=513	>AT1G11910.1 | Symbols: APA1, ATAPA1 | aspartic proteinase A1 | chr1:4017119-4019874 REVERSE LENGTH=506	16;2;2	16;2;2	16;2;2	>AT1G11910.1 | Symbols: APA1, ATAPA1 | aspartic proteinase A1 | chr1:4017119-4019874 REVERSE LENGTH=506	3	16	16	16	12	13	13	15	12	13	13	15	12	13	13	15	49.6	49.6	49.6	54.613	506	506;513;513	16	17	21	22	2.1315e-143	31.6	34.2	41.5	47	22558000000	4647300000	4184900000	7347900000	6377500000	4137300000	4157700000	9083700000	7958300000	18	15	29	29
>AT1G11990.1 | Symbols: | O-fucosyltransferase family protein | chr1:4046246-4049060 REVERSE LENGTH=590	>AT1G11990.1 | Symbols: | O-fucosyltransferase family protein | chr1:4046246-4049060 REVERSE LENGTH=590	1	1	1	>AT1G11990.1 | Symbols: | O-fucosyltransferase family protein | chr1:4046246-4049060 REVERSE LENGTH=590	1	1	1	1	1	1	1	1	1	1	1	1	1	1	1	1	2	2	2	67.313	590	590	1	1	1	1	3.7444e-07	2	2	2	2	167370000	46907000	35912000	46410000	38142000	0	0	0	47915000	0	0	1	1
>AT1G12000.1 | Symbols: | Phosphofructokinase family protein | chr1:4050159-4053727 REVERSE LENGTH=566	>AT1G12000.1 | Symbols: | Phosphofructokinase family protein | chr1:4050159-4053727 REVERSE LENGTH=566	19	19	14	>AT1G12000.1 | Symbols: | Phosphofructokinase family protein | chr1:4050159-4053727 REVERSE LENGTH=566	1	19	19	14	13	16	16	15	13	16	16	15	9	11	13	11	48.6	48.6	40.3	61.459	566	566	19	24	25	23	1.0609e-250	33.9	41.3	41.7	42.4	11243000000	2340900000	2932100000	3154100000	2815500000	2170400000	3026700000	3271200000	3538800000	12	13	25	20
>AT1G12010.1 | Symbols: | 2-oxoglutarate (2OG) and Fe(II)-dependent oxygenase superfamily protein | chr1:4056274-4057670 FORWARD LENGTH=320	>AT1G12010.1 | Symbols: | 2-oxoglutarate (2OG) and Fe(II)-dependent oxygenase superfamily protein | chr1:4056274-4057670 FORWARD LENGTH=320	1	1	1	>AT1G12010.1 | Symbols: | 2-oxoglutarate (2OG) and Fe(II)-dependent oxygenase superfamily protein | chr1:4056274-4057670 FORWARD LENGTH=320	1	1	1	1	0	1	1	1	0	1	1	1	0	1	1	1	5	5	5	36.531	320	320		1	2	1	6.2214e-06	0	5	5	5	97607000	0	24066000	52464000	21077000	0	0	0	26478000	0	0	1	0
>AT1G12050.1 | Symbols: | fumarylacetoacetase, putative | chr1:4072904-4075856 FORWARD LENGTH=421	>AT1G12050.1 | Symbols: | fumarylacetoacetase, putative | chr1:4072904-4075856 FORWARD LENGTH=421	6	6	6	>AT1G12050.1 | Symbols: | fumarylacetoacetase, putative | chr1:4072904-4075856 FORWARD LENGTH=421	1	6	6	6	5	5	6	6	5	5	6	6	5	5	6	6	17.8	17.8	17.8	46.095	421	421	6	7	8	7	5.2965e-33	15	15	17.8	17.8	1943700000	535520000	687540000	370740000	349930000	702350000	610250000	352030000	444960000	4	4	5	3
>AT1G12080.1 | Symbols: | Vacuolar calcium-binding protein-related | chr1:4084289-4084888 FORWARD LENGTH=104;>AT1G12080.2 | Symbols: | Vacuolar calcium-binding protein-related | chr1:4084289-4084888 FORWARD LENGTH=138	>AT1G12080.1 | Symbols: | Vacuolar calcium-binding protein-related | chr1:4084289-4084888 FORWARD LENGTH=104;>AT1G12080.2 | Symbols: | Vacuolar calcium-binding protein-related | chr1:4084289-4084888 FORWARD LENGTH=138	1;1	1;1	1;1	>AT1G12080.1 | Symbols: | Vacuolar calcium-binding protein-related | chr1:4084289-4084888 FORWARD LENGTH=104;>AT1G12080.2 | Symbols: | Vacuolar calcium-binding protein-related | chr1:4084289-4084888 FORWARD LENGTH=138	2	1	1	1	0	0	1	1	0	0	1	1	0	0	1	1	14.4	14.4	14.4	11.675	104	104;138			1	1	7.8346e-05	0	0	14.4	14.4	55835000	0	0	32808000	23028000	0	0	0	28929000	0	0	1	0
>AT1G12110.1 | Symbols: NRT1.1, CHL1-1, NRT1, B-1, ATNRT1, CHL1 | nitrate transporter 1.1 | chr1:4105341-4109290 FORWARD LENGTH=590	>AT1G12110.1 | Symbols: NRT1.1, CHL1-1, NRT1, B-1, ATNRT1, CHL1 | nitrate transporter 1.1 | chr1:4105341-4109290 FORWARD LENGTH=590	2	2	2	>AT1G12110.1 | Symbols: NRT1.1, CHL1-1, NRT1, B-1, ATNRT1, CHL1 | nitrate transporter 1.1 | chr1:4105341-4109290 FORWARD LENGTH=590	1	2	2	2	1	0	0	2	1	0	0	2	1	0	0	2	4.6	4.6	4.6	64.921	590	590	2			2	2.7159e-07	2.4	0	0	4.6	56047000	14115000	0	0	41932000	0	0	0	52677000	1	0	0	2
>AT1G12140.2 | Symbols: FMO GS-OX5 | flavin-monooxygenase glucosinolate S-oxygenase 5 | chr1:4121386-4123366 FORWARD LENGTH=457;>AT1G12140.1 | Symbols: FMO GS-OX5 | flavin-monooxygenase glucosinolate S-oxygenase 5 | chr1:4121386-4123366 FORWARD LENGTH=459	>AT1G12140.2 | Symbols: FMO GS-OX5 | flavin-monooxygenase glucosinolate S-oxygenase 5 | chr1:4121386-4123366 FORWARD LENGTH=457;>AT1G12140.1 | Symbols: FMO GS-OX5 | flavin-monooxygenase glucosinolate S-oxygenase 5 | chr1:4121386-4123366 FORWARD LENGTH=459	7;7	7;7	6;6	>AT1G12140.2 | Symbols: FMO GS-OX5 | flavin-monooxygenase glucosinolate S-oxygenase 5 | chr1:4121386-4123366 FORWARD LENGTH=457;>AT1G12140.1 | Symbols: FMO GS-OX5 | flavin-monooxygenase glucosinolate S-oxygenase 5 | chr1:4121386-4123366 FORWARD LENGTH=459	2	7	7	6	6	5	6	6	6	5	6	6	5	4	5	5	18.4	18.4	18.4	51.933	457	457;459	7	5	7	7	1.1283e-24	15.3	12.7	16	16	1420500000	325650000	156110000	508070000	430640000	384970000	347600000	420770000	447700000	6	4	8	7
>AT1G12230.1 | Symbols: | Aldolase superfamily protein | chr1:4148050-4150708 FORWARD LENGTH=405;>AT1G12230.2 | Symbols: | Aldolase superfamily protein | chr1:4148050-4150708 FORWARD LENGTH=427	>AT1G12230.1 | Symbols: | Aldolase superfamily protein | chr1:4148050-4150708 FORWARD LENGTH=405;>AT1G12230.2 | Symbols: | Aldolase superfamily protein | chr1:4148050-4150708 FORWARD LENGTH=427	11;11	11;11	11;11	>AT1G12230.1 | Symbols: | Aldolase superfamily protein | chr1:4148050-4150708 FORWARD LENGTH=405;>AT1G12230.2 | Symbols: | Aldolase superfamily protein | chr1:4148050-4150708 FORWARD LENGTH=427	2	11	11	11	11	11	11	11	11	11	11	11	11	11	11	11	37.3	37.3	37.3	43.994	405	405;427	14	14	17	16	5.8386e-123	37.3	37.3	37.3	37.3	11418000000	3102700000	3332000000	2705300000	2278400000	3437000000	3719500000	2725000000	2723600000	12	7	9	13
>AT1G12240.1 | Symbols: ATBETAFRUCT4, VAC-INV | Glycosyl hydrolases family 32 protein | chr1:4153699-4157457 FORWARD LENGTH=664	>AT1G12240.1 | Symbols: ATBETAFRUCT4, VAC-INV | Glycosyl hydrolases family 32 protein | chr1:4153699-4157457 FORWARD LENGTH=664	9	7	7	>AT1G12240.1 | Symbols: ATBETAFRUCT4, VAC-INV | Glycosyl hydrolases family 32 protein | chr1:4153699-4157457 FORWARD LENGTH=664	1	9	7	7	6	8	9	7	5	6	7	5	5	6	7	5	19.3	16.1	16.1	73.843	664	664	7	9	8	7	1.6289e-54	14.3	17.8	19.3	15.8	2144100000	722440000	641160000	452130000	328380000	745760000	701350000	456530000	432500000	7	9	7	4
>AT1G12270.1 | Symbols: Hop1 | stress-inducible protein, putative | chr1:4172105-4174575 FORWARD LENGTH=572	>AT1G12270.1 | Symbols: Hop1 | stress-inducible protein, putative | chr1:4172105-4174575 FORWARD LENGTH=572	3	3	3	>AT1G12270.1 | Symbols: Hop1 | stress-inducible protein, putative | chr1:4172105-4174575 FORWARD LENGTH=572	1	3	3	3	3	3	2	2	3	3	2	2	3	3	2	2	8	8	8	64.584	572	572	3	3	2	2	5.5837e-12	8	8	5.9	5.9	372390000	140060000	118300000	67858000	46170000	121020000	123010000	90065000	72401000	2	2	0	1
>AT1G12310.1 | Symbols: | Calcium-binding EF-hand family protein | chr1:4187500-4187946 REVERSE LENGTH=148	>AT1G12310.1 | Symbols: | Calcium-binding EF-hand family protein | chr1:4187500-4187946 REVERSE LENGTH=148	5	5	3	>AT1G12310.1 | Symbols: | Calcium-binding EF-hand family protein | chr1:4187500-4187946 REVERSE LENGTH=148	1	5	5	3	4	4	3	4	4	4	3	4	3	2	2	3	37.2	37.2	26.4	16.517	148	148	4	4	4	4	3.8336e-43	31.1	29.1	21.6	31.1	2236900000	930710000	636960000	246740000	422510000	813120000	773630000	352230000	475230000	3	4	1	3
>AT1G12350.1 | Symbols: ATCOAB, COAB | 4-phospho-panto-thenoylcysteine synthetase | chr1:4198870-4200633 FORWARD LENGTH=317	>AT1G12350.1 | Symbols: ATCOAB, COAB | 4-phospho-panto-thenoylcysteine synthetase | chr1:4198870-4200633 FORWARD LENGTH=317	2	2	2	>AT1G12350.1 | Symbols: ATCOAB, COAB | 4-phospho-panto-thenoylcysteine synthetase | chr1:4198870-4200633 FORWARD LENGTH=317	1	2	2	2	1	2	2	2	1	2	2	2	1	2	2	2	11.7	11.7	11.7	35.368	317	317	2	3	2	3	3.429e-30	6.9	11.7	11.7	11.7	485970000	110920000	278390000	48611000	48044000	85201000	257360000	97883000	99417000	2	2	1	0
>AT1G12360.1 | Symbols: KEU | Sec1/munc18-like (SM) proteins superfamily | chr1:4201172-4206144 FORWARD LENGTH=666	>AT1G12360.1 | Symbols: KEU | Sec1/munc18-like (SM) proteins superfamily | chr1:4201172-4206144 FORWARD LENGTH=666	10	10	10	>AT1G12360.1 | Symbols: KEU | Sec1/munc18-like (SM) proteins superfamily | chr1:4201172-4206144 FORWARD LENGTH=666	1	10	10	10	7	9	7	7	7	9	7	7	7	9	7	7	23	23	23	75.082	666	666	8	9	9	8	1.2035e-51	17	21	15	15.5	1564700000	403520000	330490000	387580000	443160000	370580000	336920000	377150000	632690000	6	7	4	5
>AT1G12470.1 | Symbols: | zinc ion binding | chr1:4251359-4257201 FORWARD LENGTH=988	>AT1G12470.1 | Symbols: | zinc ion binding | chr1:4251359-4257201 FORWARD LENGTH=988	6	6	6	>AT1G12470.1 | Symbols: | zinc ion binding | chr1:4251359-4257201 FORWARD LENGTH=988	1	6	6	6	5	4	5	4	5	4	5	4	5	4	5	4	7.3	7.3	7.3	112.32	988	988	5	5	5	5	1.3997e-56	6	4.9	6.2	5.2	632760000	216760000	169300000	156510000	90182000	203880000	168650000	154130000	137650000	3	3	2	1
>AT1G12640.1 | Symbols: | MBOAT (membrane bound O-acyl transferase) family protein | chr1:4303586-4305666 REVERSE LENGTH=462;>AT1G63050.1 | Symbols: | MBOAT (membrane bound O-acyl transferase) family protein | chr1:23376061-23378178 REVERSE LENGTH=465	>AT1G12640.1 | Symbols: | MBOAT (membrane bound O-acyl transferase) family protein | chr1:4303586-4305666 REVERSE LENGTH=462	4;1	4;1	4;1	>AT1G12640.1 | Symbols: | MBOAT (membrane bound O-acyl transferase) family protein | chr1:4303586-4305666 REVERSE LENGTH=462	2	4	4	4	2	2	3	3	2	2	3	3	2	2	3	3	9.3	9.3	9.3	52.152	462	462;465	2	2	3	3	2.0635e-19	5.2	5.2	7.1	7.4	608760000	126710000	83356000	236680000	162020000	138380000	106360000	257350000	182310000	2	1	3	2
>AT1G12750.3 | Symbols: RBL6 | RHOMBOID-like protein 6 | chr1:4345100-4346688 REVERSE LENGTH=307;>AT1G12750.2 | Symbols: ATRBL6, RBL6 | RHOMBOID-like protein 6 | chr1:4345100-4346688 REVERSE LENGTH=307;>AT1G12750.1 | Symbols: ATRBL6, RBL6 | RHOMBOID-like protein 6 | chr1:4345100-4346688 REVERSE LENGTH=307;>AT1G63120.1 | Symbols: ATRBL2, RBL2 | RHOMBOID-like 2 | chr1:23409054-23410725 REVERSE LENG…	>AT1G12750.3 | Symbols: RBL6 | RHOMBOID-like protein 6 | chr1:4345100-4346688 REVERSE LENGTH=307;>AT1G12750.2 | Symbols: ATRBL6, RBL6 | RHOMBOID-like protein 6 | chr1:4345100-4346688 REVERSE LENGTH=307;>AT1G12750.1 | Symbols: ATRBL6, RBL6 | RHOMBOID-like protein 6 | chr1:4345100-4346688 REVERSE LENGTH=307;>AT1G63120.1 | Symbols: ATRBL2, RBL2 | RHOMBOID-like 2 | chr1:23409054-23410725 REVERSE LENG…	1;1;1;1	1;1;1;1	1;1;1;1	>AT1G12750.3 | Symbols: RBL6 | RHOMBOID-like protein 6 | chr1:4345100-4346688 REVERSE LENGTH=307;>AT1G12750.2 | Symbols: ATRBL6, RBL6 | RHOMBOID-like protein 6 | chr1:4345100-4346688 REVERSE LENGTH=307;>AT1G12750.1 | Symbols: ATRBL6, RBL6 | RHOMBOID-like p	4	1	1	1	0	0	1	0	0	0	1	0	0	0	1	0	2.9	2.9	2.9	34.289	307	307;307;307;317			1		0.00047321	0	0	2.9	0	0	0	0	0	0	0	0	0	0	0	0	0	0
>AT1G12780.1 | Symbols: UGE1, ATUGE1 | UDP-D-glucose/UDP-D-galactose 4-epimerase 1 | chr1:4356124-4358120 REVERSE LENGTH=351;>AT1G63180.1 | Symbols: UGE3 | UDP-D-glucose/UDP-D-galactose 4-epimerase 3 | chr1:23427559-23429384 REVERSE LENGTH=351	>AT1G12780.1 | Symbols: UGE1, ATUGE1 | UDP-D-glucose/UDP-D-galactose 4-epimerase 1 | chr1:4356124-4358120 REVERSE LENGTH=351	11;2	11;2	11;2	>AT1G12780.1 | Symbols: UGE1, ATUGE1 | UDP-D-glucose/UDP-D-galactose 4-epimerase 1 | chr1:4356124-4358120 REVERSE LENGTH=351	2	11	11	11	8	8	9	9	8	8	9	9	8	8	9	9	44.7	44.7	44.7	39.157	351	351;351	12	10	11	12	1.0043e-86	29.1	31.1	37	37	3669200000	1086700000	900490000	949290000	732730000	831950000	898410000	1113500000	950550000	8	6	12	10
>AT1G12840.1 | Symbols: DET3, ATVHA-C | vacuolar ATP synthase subunit C (VATC) / V-ATPase C subunit / vacuolar proton pump C subunit (DET3) | chr1:4375584-4378220 FORWARD LENGTH=375	>AT1G12840.1 | Symbols: DET3, ATVHA-C | vacuolar ATP synthase subunit C (VATC) / V-ATPase C subunit / vacuolar proton pump C subunit (DET3) | chr1:4375584-4378220 FORWARD LENGTH=375	18	18	18	>AT1G12840.1 | Symbols: DET3, ATVHA-C | vacuolar ATP synthase subunit C (VATC) / V-ATPase C subunit / vacuolar proton pump C subunit (DET3) | chr1:4375584-4378220 FORWARD LENGTH=375	1	18	18	18	16	16	18	17	16	16	18	17	16	16	18	17	54.9	54.9	54.9	42.619	375	375	25	22	26	25	1.5307e-211	50.4	50.4	54.9	52.8	37451000000	12311000000	9727600000	7319900000	8092600000	11848000000	11378000000	7940900000	9353900000	24	15	22	26
>AT1G12850.1 | Symbols: | Phosphoglycerate mutase family protein | chr1:4380022-4381577 REVERSE LENGTH=405	>AT1G12850.1 | Symbols: | Phosphoglycerate mutase family protein | chr1:4380022-4381577 REVERSE LENGTH=405	1	1	1	>AT1G12850.1 | Symbols: | Phosphoglycerate mutase family protein | chr1:4380022-4381577 REVERSE LENGTH=405	1	1	1	1	1	1	1	0	1	1	1	0	1	1	1	0	2.7	2.7	2.7	44.86	405	405	1	1	1		0.0021173	2.7	2.7	2.7	0	52614000	19899000	16210000	16505000	0	0	0	18115000	0	0	0	1	0
>AT3G26640.1 | Symbols: LWD2 | Transducin/WD40 repeat-like superfamily protein | chr3:9793276-9794316 FORWARD LENGTH=346;>AT1G12910.1 | Symbols: ATAN11, LWD1 | Transducin/WD40 repeat-like superfamily protein | chr1:4395114-4396154 REVERSE LENGTH=346	>AT3G26640.1 | Symbols: LWD2 | Transducin/WD40 repeat-like superfamily protein | chr3:9793276-9794316 FORWARD LENGTH=346;>AT1G12910.1 | Symbols: ATAN11, LWD1 | Transducin/WD40 repeat-like superfamily protein | chr1:4395114-4396154 REVERSE LENGTH=346	1;1	1;1	1;1	>AT3G26640.1 | Symbols: LWD2 | Transducin/WD40 repeat-like superfamily protein | chr3:9793276-9794316 FORWARD LENGTH=346;>AT1G12910.1 | Symbols: ATAN11, LWD1 | Transducin/WD40 repeat-like superfamily protein | chr1:4395114-4396154 REVERSE LENGTH=346	2	1	1	1	1	1	1	1	1	1	1	1	1	1	1	1	3.2	3.2	3.2	39.091	346	346;346	1	1	1	1	3.2272e-05	3.2	3.2	3.2	3.2	87687000	33261000	25962000	13195000	15269000	0	0	0	19181000	1	0	0	0
>AT1G12920.1 | Symbols: ERF1-2 | eukaryotic release factor 1-2 | chr1:4396555-4397859 REVERSE LENGTH=434	>AT1G12920.1 | Symbols: ERF1-2 | eukaryotic release factor 1-2 | chr1:4396555-4397859 REVERSE LENGTH=434	9	9	1	>AT1G12920.1 | Symbols: ERF1-2 | eukaryotic release factor 1-2 | chr1:4396555-4397859 REVERSE LENGTH=434	1	9	9	1	6	7	5	6	6	7	5	6	1	1	1	1	24.9	24.9	2.3	48.941	434	434	7	9	5	7	2.1611e-52	16.1	19.8	13.4	15.9	2265100000	687570000	659370000	441330000	476880000	691390000	708720000	547480000	545230000	7	5	4	6
>AT1G13000.2 | Symbols: | Protein of unknown function (DUF707) | chr1:4436402-4438693 REVERSE LENGTH=401;>AT1G13000.1 | Symbols: | Protein of unknown function (DUF707) | chr1:4436402-4438693 REVERSE LENGTH=401	>AT1G13000.2 | Symbols: | Protein of unknown function (DUF707) | chr1:4436402-4438693 REVERSE LENGTH=401;>AT1G13000.1 | Symbols: | Protein of unknown function (DUF707) | chr1:4436402-4438693 REVERSE LENGTH=401	2;2	1;1	1;1	>AT1G13000.2 | Symbols: | Protein of unknown function (DUF707) | chr1:4436402-4438693 REVERSE LENGTH=401;>AT1G13000.1 | Symbols: | Protein of unknown function (DUF707) | chr1:4436402-4438693 REVERSE LENGTH=401	2	2	1	1	2	2	2	2	1	1	1	1	1	1	1	1	5.2	3.2	3.2	45.85	401	401;401	1	1	1	1	1.2673e-09	5.2	5.2	5.2	5.2	81332000	25913000	28722000	15935000	10763000	0	0	0	13521000	0	0	0	1
>AT1G13060.1 | Symbols: PBE1 | 20S proteasome beta subunit E1 | chr1:4452641-4454663 FORWARD LENGTH=274;>AT1G13060.2 | Symbols: PBE1 | 20S proteasome beta subunit E1 | chr1:4452641-4454663 FORWARD LENGTH=298	>AT1G13060.1 | Symbols: PBE1 | 20S proteasome beta subunit E1 | chr1:4452641-4454663 FORWARD LENGTH=274;>AT1G13060.2 | Symbols: PBE1 | 20S proteasome beta subunit E1 | chr1:4452641-4454663 FORWARD LENGTH=298	7;7	7;7	4;4	>AT1G13060.1 | Symbols: PBE1 | 20S proteasome beta subunit E1 | chr1:4452641-4454663 FORWARD LENGTH=274;>AT1G13060.2 | Symbols: PBE1 | 20S proteasome beta subunit E1 | chr1:4452641-4454663 FORWARD LENGTH=298	2	7	7	4	6	6	6	6	6	6	6	6	4	4	4	3	40.5	40.5	27	29.667	274	274;298	7	7	7	7	3.8104e-40	37.6	37.6	37.6	35.8	3566200000	992980000	987840000	891500000	693930000	891450000	1044000000	1043000000	983250000	9	7	8	5
>AT1G13080.1 | Symbols: CYP71B2 | cytochrome P450, family 71, subfamily B, polypeptide 2 | chr1:4459212-4460807 FORWARD LENGTH=502;>AT1G13080.2 | Symbols: CYP71B2 | cytochrome P450, family 71, subfamily B, polypeptide 2 | chr1:4459493-4460807 FORWARD LENGTH=384	>AT1G13080.1 | Symbols: CYP71B2 | cytochrome P450, family 71, subfamily B, polypeptide 2 | chr1:4459212-4460807 FORWARD LENGTH=502;>AT1G13080.2 | Symbols: CYP71B2 | cytochrome P450, family 71, subfamily B, polypeptide 2 | chr1:4459493-4460807 FORWARD LENGTH=384	8;6	8;6	8;6	>AT1G13080.1 | Symbols: CYP71B2 | cytochrome P450, family 71, subfamily B, polypeptide 2 | chr1:4459212-4460807 FORWARD LENGTH=502;>AT1G13080.2 | Symbols: CYP71B2 | cytochrome P450, family 71, subfamily B, polypeptide 2 | chr1:4459493-4460807 FORWARD LENGT	2	8	8	8	7	7	8	8	7	7	8	8	7	7	8	8	18.5	18.5	18.5	57.14	502	502;384	8	7	10	10	1.0432e-38	16.5	16.5	18.5	18.5	2225100000	628090000	469820000	553720000	573500000	565840000	548780000	536450000	620920000	4	5	8	9
>AT1G13090.1 | Symbols: CYP71B28 | cytochrome P450, family 71, subfamily B, polypeptide 28 | chr1:4461846-4463400 FORWARD LENGTH=490	>AT1G13090.1 | Symbols: CYP71B28 | cytochrome P450, family 71, subfamily B, polypeptide 28 | chr1:4461846-4463400 FORWARD LENGTH=490	7	3	3	>AT1G13090.1 | Symbols: CYP71B28 | cytochrome P450, family 71, subfamily B, polypeptide 28 | chr1:4461846-4463400 FORWARD LENGTH=490	1	7	3	3	7	7	6	5	3	3	3	2	3	3	3	2	17.1	8	8	56.536	490	490	4	4	3	2	7.1228e-39	17.1	17.1	15.3	12.4	386490000	126700000	121610000	85899000	52277000	85379000	82325000	156790000	99864000	2	0	2	1
>AT1G13110.1 | Symbols: CYP71B7 | cytochrome P450, family 71 subfamily B, polypeptide 7 | chr1:4467272-4468857 FORWARD LENGTH=504;>AT1G13100.1 | Symbols: CYP71B29 | cytochrome P450, family 71, subfamily B, polypeptide 29 | chr1:4463983-4465538 FORWARD LENGTH=490	>AT1G13110.1 | Symbols: CYP71B7 | cytochrome P450, family 71 subfamily B, polypeptide 7 | chr1:4467272-4468857 FORWARD LENGTH=504	10;3	10;3	6;1	>AT1G13110.1 | Symbols: CYP71B7 | cytochrome P450, family 71 subfamily B, polypeptide 7 | chr1:4467272-4468857 FORWARD LENGTH=504	2	10	10	6	9	9	9	8	9	9	9	8	5	5	6	5	23.4	23.4	14.5	57.208	504	504;490	10	11	11	10	6.6141e-52	21.4	21.4	21.6	19.8	3266700000	859520000	857850000	848690000	700640000	854490000	896300000	926210000	950440000	5	10	9	10
>AT1G13180.1 | Symbols: DIS1, ARP3, ATARP3 | Actin-like ATPase superfamily protein | chr1:4495394-4498204 FORWARD LENGTH=427	>AT1G13180.1 | Symbols: DIS1, ARP3, ATARP3 | Actin-like ATPase superfamily protein | chr1:4495394-4498204 FORWARD LENGTH=427	1	1	1	>AT1G13180.1 | Symbols: DIS1, ARP3, ATARP3 | Actin-like ATPase superfamily protein | chr1:4495394-4498204 FORWARD LENGTH=427	1	1	1	1	0	0	1	0	0	0	1	0	0	0	1	0	4.9	4.9	4.9	47.659	427	427			1		6.0312e-09	0	0	4.9	0	73276000	0	0	73276000	0	0	0	80424000	0	0	0	1	0
>AT3G25610.1 | Symbols: | ATPase E1-E2 type family protein / haloacid dehalogenase-like hydrolase family protein | chr3:9308942-9313353 REVERSE LENGTH=1202;>AT1G13210.1 | Symbols: ACA.l | autoinhibited Ca2+/ATPase II | chr1:4509252-4513774 REVERSE LENGTH=1203	>AT3G25610.1 | Symbols: | ATPase E1-E2 type family protein / haloacid dehalogenase-like hydrolase family protein | chr3:9308942-9313353 REVERSE LENGTH=1202;>AT1G13210.1 | Symbols: ACA.l | autoinhibited Ca2+/ATPase II | chr1:4509252-4513774 REVERSE LENGTH=1203	1;1	1;1	1;1	>AT3G25610.1 | Symbols: | ATPase E1-E2 type family protein / haloacid dehalogenase-like hydrolase family protein | chr3:9308942-9313353 REVERSE LENGTH=1202;>AT1G13210.1 | Symbols: ACA.l | autoinhibited Ca2+/ATPase II | chr1:4509252-4513774 REVERSE LENGTH=	2	1	1	1	1	0	0	0	1	0	0	0	1	0	0	0	1.5	1.5	1.5	136.28	1202	1202;1203	1				4.3892e-10	1.5	0	0	0	0	0	0	0	0	0	0	0	0	0	0	0	0
>AT1G13280.1 | Symbols: AOC4 | allene oxide cyclase 4 | chr1:4547624-4548552 FORWARD LENGTH=254;>AT3G25770.1 | Symbols: AOC2 | allene oxide cyclase 2 | chr3:9406975-9407839 FORWARD LENGTH=253;>AT3G25760.1 | Symbols: AOC1, ERD12 | allene oxide cyclase 1 | chr3:9403972-9405105 FORWARD LENGTH=254	>AT1G13280.1 | Symbols: AOC4 | allene oxide cyclase 4 | chr1:4547624-4548552 FORWARD LENGTH=254	6;1;1	6;1;1	5;0;0	>AT1G13280.1 | Symbols: AOC4 | allene oxide cyclase 4 | chr1:4547624-4548552 FORWARD LENGTH=254	3	6	6	5	5	3	4	5	5	3	4	5	4	2	3	4	31.9	31.9	28.7	27.809	254	254;253;254	7	4	5	6	1.9429e-33	28.7	18.1	20.1	23.2	2066000000	625730000	123540000	812780000	503970000	512660000	248830000	760360000	768950000	4	1	3	5
>AT1G13320.3 | Symbols: PP2AA3 | protein phosphatase 2A subunit A3 | chr1:4563692-4567348 REVERSE LENGTH=587;>AT1G13320.1 | Symbols: PP2AA3 | protein phosphatase 2A subunit A3 | chr1:4563692-4567348 REVERSE LENGTH=587;>AT1G13320.2 | Symbols: PP2AA3 | protein phosphatase 2A subunit A3 | chr1:4563970-4567348 REVERSE LENGTH=537	>AT1G13320.3 | Symbols: PP2AA3 | protein phosphatase 2A subunit A3 | chr1:4563692-4567348 REVERSE LENGTH=587;>AT1G13320.1 | Symbols: PP2AA3 | protein phosphatase 2A subunit A3 | chr1:4563692-4567348 REVERSE LENGTH=587;>AT1G13320.2 | Symbols: PP2AA3 | protein phosphatase 2A subunit A3 | chr1:4563970-4567348 REVERSE LENGTH=537	18;18;16	11;11;9	11;11;9	>AT1G13320.3 | Symbols: PP2AA3 | protein phosphatase 2A subunit A3 | chr1:4563692-4567348 REVERSE LENGTH=587;>AT1G13320.1 | Symbols: PP2AA3 | protein phosphatase 2A subunit A3 | chr1:4563692-4567348 REVERSE LENGTH=587;>AT1G13320.2 | Symbols: PP2AA3 | pro	3	18	11	11	12	14	11	16	7	9	7	10	7	9	7	10	46.8	27.9	27.9	65.516	587	587;587;537	10	11	7	12	3.927e-130	29.1	34.6	29.1	43.8	2720000000	633130000	695770000	679870000	711240000	816620000	844470000	651370000	685390000	8	6	6	7
>AT1G13440.1 | Symbols: GAPC-2, GAPC2 | glyceraldehyde-3-phosphate dehydrogenase C2 | chr1:4608465-4610494 REVERSE LENGTH=338;>AT1G13440.2 | Symbols: GAPC-2, GAPC2 | glyceraldehyde-3-phosphate dehydrogenase C2 | chr1:4608465-4610494 REVERSE LENGTH=310	>AT1G13440.1 | Symbols: GAPC-2, GAPC2 | glyceraldehyde-3-phosphate dehydrogenase C2 | chr1:4608465-4610494 REVERSE LENGTH=338;>AT1G13440.2 | Symbols: GAPC-2, GAPC2 | glyceraldehyde-3-phosphate dehydrogenase C2 | chr1:4608465-4610494 REVERSE LENGTH=310	22;19	3;3	3;3	>AT1G13440.1 | Symbols: GAPC-2, GAPC2 | glyceraldehyde-3-phosphate dehydrogenase C2 | chr1:4608465-4610494 REVERSE LENGTH=338;>AT1G13440.2 | Symbols: GAPC-2, GAPC2 | glyceraldehyde-3-phosphate dehydrogenase C2 | chr1:4608465-4610494 REVERSE LENGTH=310	2	22	3	3	18	19	21	22	3	3	3	3	3	3	3	3	76.3	10.4	10.4	36.913	338	338;310	16	11	17	15	0	67.5	74.3	74.3	76.3	3405900000	1071700000	741260000	888540000	704400000	521210000	420370000	824670000	761730000	24	22	25	31
>AT3G25585.4 | Symbols: AAPT2, ATAAPT2 | aminoalcoholphosphotransferase | chr3:9295856-9298271 FORWARD LENGTH=389;>AT3G25585.2 | Symbols: AAPT2, ATAAPT2 | aminoalcoholphosphotransferase | chr3:9295856-9298271 FORWARD LENGTH=389;>AT3G25585.1 | Symbols: AAPT2, ATAAPT2 | aminoalcoholphosphotransferase | chr3:9295856-9298271 FORWARD LENGTH=389;>AT1G13560.1 | Symbols: AAPT1, ATAAPT1 | aminoalcoholphos…	>AT3G25585.4 | Symbols: AAPT2, ATAAPT2 | aminoalcoholphosphotransferase | chr3:9295856-9298271 FORWARD LENGTH=389;>AT3G25585.2 | Symbols: AAPT2, ATAAPT2 | aminoalcoholphosphotransferase | chr3:9295856-9298271 FORWARD LENGTH=389;>AT3G25585.1 | Symbols: AAPT2, ATAAPT2 | aminoalcoholphosphotransferase | chr3:9295856-9298271 FORWARD LENGTH=389;>AT1G13560.1 | Symbols: AAPT1, ATAAPT1 | aminoalcoholphos…	2;2;2;2;1;1	2;2;2;2;1;1	2;2;2;2;1;1	>AT3G25585.4 | Symbols: AAPT2, ATAAPT2 | aminoalcoholphosphotransferase | chr3:9295856-9298271 FORWARD LENGTH=389;>AT3G25585.2 | Symbols: AAPT2, ATAAPT2 | aminoalcoholphosphotransferase | chr3:9295856-9298271 FORWARD LENGTH=389;>AT3G25585.1 | Symbols: AAPT	6	2	2	2	1	1	2	2	1	1	2	2	1	1	2	2	5.7	5.7	5.7	43.639	389	389;389;389;389;337;346	1	2	4	4	1.572e-10	2.8	2.8	5.7	5.7	1928300000	480310000	592570000	470460000	384960000	0	741370000	477370000	452210000	1	0	4	3
>AT1G13700.1 | Symbols: PGL1 | 6-phosphogluconolactonase 1 | chr1:4694475-4695600 REVERSE LENGTH=268	>AT1G13700.1 | Symbols: PGL1 | 6-phosphogluconolactonase 1 | chr1:4694475-4695600 REVERSE LENGTH=268	1	1	1	>AT1G13700.1 | Symbols: PGL1 | 6-phosphogluconolactonase 1 | chr1:4694475-4695600 REVERSE LENGTH=268	1	1	1	1	0	1	0	1	0	1	0	1	0	1	0	1	8.6	8.6	8.6	29.887	268	268		1		1	3.9368e-08	0	8.6	0	8.6	27615000	0	16981000	0	10634000	0	0	0	13359000	0	1	0	0
>AT1G13750.1 | Symbols: | Purple acid phosphatases superfamily protein | chr1:4715490-4718091 REVERSE LENGTH=613	>AT1G13750.1 | Symbols: | Purple acid phosphatases superfamily protein | chr1:4715490-4718091 REVERSE LENGTH=613	2	2	2	>AT1G13750.1 | Symbols: | Purple acid phosphatases superfamily protein | chr1:4715490-4718091 REVERSE LENGTH=613	1	2	2	2	0	0	2	2	0	0	2	2	0	0	2	2	5.7	5.7	5.7	68.241	613	613			2	2	3.9652e-06	0	0	5.7	5.7	86117000	0	0	58801000	27317000	0	0	64824000	34029000	0	0	1	1
>AT1G13870.1 | Symbols: DRL1, AtKTI12 | calmodulin binding;purine nucleotide binding | chr1:4747437-4748345 REVERSE LENGTH=302	>AT1G13870.1 | Symbols: DRL1, AtKTI12 | calmodulin binding;purine nucleotide binding | chr1:4747437-4748345 REVERSE LENGTH=302	2	2	2	>AT1G13870.1 | Symbols: DRL1, AtKTI12 | calmodulin binding;purine nucleotide binding | chr1:4747437-4748345 REVERSE LENGTH=302	1	2	2	2	1	2	0	1	1	2	0	1	1	2	0	1	7.9	7.9	7.9	34.063	302	302	1	2		1	1.1845e-09	4	7.9	0	4	169760000	51764000	84916000	0	33076000	0	96153000	0	0	1	1	0	1
>AT1G13900.1 | Symbols: | Purple acid phosphatases superfamily protein | chr1:4753494-4755554 REVERSE LENGTH=656	>AT1G13900.1 | Symbols: | Purple acid phosphatases superfamily protein | chr1:4753494-4755554 REVERSE LENGTH=656	2	2	2	>AT1G13900.1 | Symbols: | Purple acid phosphatases superfamily protein | chr1:4753494-4755554 REVERSE LENGTH=656	1	2	2	2	2	2	2	2	2	2	2	2	2	2	2	2	3.4	3.4	3.4	73.716	656	656	2	2	3	2	2.0548e-06	3.4	3.4	3.4	3.4	296900000	76477000	69898000	96272000	54258000	71503000	75704000	77697000	74171000	2	0	1	1
>AT1G13930.3 | Symbols: | Involved in response to salt stress. Knockout mutants are hypersensitive to salt stress. | chr1:4761091-4761558 FORWARD LENGTH=155;>AT1G13930.2 | Symbols: | Involved in response to salt stress. Knockout mutants are hypersensitive to salt stress. | chr1:4761091-4761558 FORWARD LENGTH=155;>AT1G13930.1 | Symbols: | Involved in response to salt stress. Knockout mutants are h…	>AT1G13930.3 | Symbols: | Involved in response to salt stress. Knockout mutants are hypersensitive to salt stress. | chr1:4761091-4761558 FORWARD LENGTH=155;>AT1G13930.2 | Symbols: | Involved in response to salt stress. Knockout mutants are hypersensitive to salt stress. | chr1:4761091-4761558 FORWARD LENGTH=155;>AT1G13930.1 | Symbols: | Involved in response to salt stress. Knockout mutants are h…	3;3;3	3;3;3	3;3;3	>AT1G13930.3 | Symbols: | Involved in response to salt stress. Knockout mutants are hypersensitive to salt stress. | chr1:4761091-4761558 FORWARD LENGTH=155;>AT1G13930.2 | Symbols: | Involved in response to salt stress. Knockout mutants are hypersensit	3	3	3	3	3	3	2	1	3	3	2	1	3	3	2	1	21.9	21.9	21.9	16.163	155	155;155;155	3	4	2	1	7.1309e-19	21.9	21.9	16.1	9	1646000000	639370000	702470000	264430000	39726000	639590000	805950000	279480000	0	4	4	1	0
>AT1G13980.2 | Symbols: GN | sec7 domain-containing protein | chr1:4789587-4794397 FORWARD LENGTH=1451;>AT1G13980.1 | Symbols: GN, VAN7, EMB30 | sec7 domain-containing protein | chr1:4789587-4794397 FORWARD LENGTH=1451	>AT1G13980.2 | Symbols: GN | sec7 domain-containing protein | chr1:4789587-4794397 FORWARD LENGTH=1451;>AT1G13980.1 | Symbols: GN, VAN7, EMB30 | sec7 domain-containing protein | chr1:4789587-4794397 FORWARD LENGTH=1451	9;9	9;9	7;7	>AT1G13980.2 | Symbols: GN | sec7 domain-containing protein | chr1:4789587-4794397 FORWARD LENGTH=1451;>AT1G13980.1 | Symbols: GN, VAN7, EMB30 | sec7 domain-containing protein | chr1:4789587-4794397 FORWARD LENGTH=1451	2	9	9	7	7	7	6	9	7	7	6	9	5	5	6	7	9	9	7.4	162.62	1451	1451;1451	8	8	6	12	5.8496e-57	7	7	5.9	9	2023200000	749400000	700380000	164080000	409300000	583110000	618990000	502980000	412470000	5	4	3	4
>AT1G14000.1 | Symbols: VIK | VH1-interacting kinase | chr1:4797606-4800043 FORWARD LENGTH=438	>AT1G14000.1 | Symbols: VIK | VH1-interacting kinase | chr1:4797606-4800043 FORWARD LENGTH=438	7	7	7	>AT1G14000.1 | Symbols: VIK | VH1-interacting kinase | chr1:4797606-4800043 FORWARD LENGTH=438	1	7	7	7	2	5	6	4	2	5	6	4	2	5	6	4	20.3	20.3	20.3	49.335	438	438	3	6	7	5	5.1057e-22	4.6	13.7	16.9	10.5	791110000	161610000	272860000	233420000	123220000	249360000	186290000	155720000	158230000	2	1	6	2
>AT1G14010.1 | Symbols: | emp24/gp25L/p24 family/GOLD family protein | chr1:4800385-4801790 REVERSE LENGTH=212	>AT1G14010.1 | Symbols: | emp24/gp25L/p24 family/GOLD family protein | chr1:4800385-4801790 REVERSE LENGTH=212	2	2	2	>AT1G14010.1 | Symbols: | emp24/gp25L/p24 family/GOLD family protein | chr1:4800385-4801790 REVERSE LENGTH=212	1	2	2	2	1	1	1	2	1	1	1	2	1	1	1	2	15.6	15.6	15.6	24.155	212	212	1	1	1	2	9.9014e-08	8	7.5	7.5	15.6	192650000	35169000	53638000	40130000	63718000	0	0	0	80045000	1	0	1	2
>AT1G14040.1 | Symbols: | EXS (ERD1/XPR1/SYG1) family protein | chr1:4810488-4814543 FORWARD LENGTH=813	>AT1G14040.1 | Symbols: | EXS (ERD1/XPR1/SYG1) family protein | chr1:4810488-4814543 FORWARD LENGTH=813	1	1	1	>AT1G14040.1 | Symbols: | EXS (ERD1/XPR1/SYG1) family protein | chr1:4810488-4814543 FORWARD LENGTH=813	1	1	1	1	0	0	1	0	0	0	1	0	0	0	1	0	1.8	1.8	1.8	93.835	813	813			1		0.00087711	0	0	1.8	0	0	0	0	0	0	0	0	0	0	0	0	0	0
>AT1G14080.1 | Symbols: FUT6, ATFUT6 | fucosyltransferase 6 | chr1:4822580-4824218 FORWARD LENGTH=519	>AT1G14080.1 | Symbols: FUT6, ATFUT6 | fucosyltransferase 6 | chr1:4822580-4824218 FORWARD LENGTH=519	1	1	1	>AT1G14080.1 | Symbols: FUT6, ATFUT6 | fucosyltransferase 6 | chr1:4822580-4824218 FORWARD LENGTH=519	1	1	1	1	1	1	0	0	1	1	0	0	1	1	0	0	2.9	2.9	2.9	59.035	519	519	1	1			0.00078138	2.9	2.9	0	0	48687000	25693000	22993000	0	0	0	26036000	0	0	1	0	0	0
>AT1G14120.1 | Symbols: | 2-oxoglutarate (2OG) and Fe(II)-dependent oxygenase superfamily protein | chr1:4833648-4834833 REVERSE LENGTH=312	>AT1G14120.1 | Symbols: | 2-oxoglutarate (2OG) and Fe(II)-dependent oxygenase superfamily protein | chr1:4833648-4834833 REVERSE LENGTH=312	2	2	2	>AT1G14120.1 | Symbols: | 2-oxoglutarate (2OG) and Fe(II)-dependent oxygenase superfamily protein | chr1:4833648-4834833 REVERSE LENGTH=312	1	2	2	2	1	1	2	2	1	1	2	2	1	1	2	2	9	9	9	35.119	312	312	1	1	3	3	6.3206e-13	4.8	4.8	9	9	241580000	6570200	44965000	108710000	81336000	0	0	121700000	99794000	0	1	3	2
>AT1G14130.1 | Symbols: | 2-oxoglutarate (2OG) and Fe(II)-dependent oxygenase superfamily protein | chr1:4836041-4837040 REVERSE LENGTH=308	>AT1G14130.1 | Symbols: | 2-oxoglutarate (2OG) and Fe(II)-dependent oxygenase superfamily protein | chr1:4836041-4837040 REVERSE LENGTH=308	2	2	2	>AT1G14130.1 | Symbols: | 2-oxoglutarate (2OG) and Fe(II)-dependent oxygenase superfamily protein | chr1:4836041-4837040 REVERSE LENGTH=308	1	2	2	2	0	0	1	2	0	0	1	2	0	0	1	2	13.3	13.3	13.3	34.634	308	308			1	2	4.3513e-06	0	0	9.1	13.3	44036000	0	0	18649000	25387000	0	0	0	31892000	0	0	1	2
>AT1G14170.2 | Symbols: | RNA-binding KH domain-containing protein | chr1:4843463-4845253 REVERSE LENGTH=446;>AT1G14170.1 | Symbols: | RNA-binding KH domain-containing protein | chr1:4843463-4845253 REVERSE LENGTH=454;>AT1G14170.3 | Symbols: | RNA-binding KH domain-containing protein | chr1:4843463-4845253 REVERSE LENGTH=479	>AT1G14170.2 | Symbols: | RNA-binding KH domain-containing protein | chr1:4843463-4845253 REVERSE LENGTH=446;>AT1G14170.1 | Symbols: | RNA-binding KH domain-containing protein | chr1:4843463-4845253 REVERSE LENGTH=454;>AT1G14170.3 | Symbols: | RNA-binding KH domain-containing protein | chr1:4843463-4845253 REVERSE LENGTH=479	4;4;4	4;4;4	4;4;4	>AT1G14170.2 | Symbols: | RNA-binding KH domain-containing protein | chr1:4843463-4845253 REVERSE LENGTH=446;>AT1G14170.1 | Symbols: | RNA-binding KH domain-containing protein | chr1:4843463-4845253 REVERSE LENGTH=454;>AT1G14170.3 | Symbols: | RNA-bindi	3	4	4	4	2	1	2	2	2	1	2	2	2	1	2	2	11.9	11.9	11.9	48.912	446	446;454;479	2	1	2	2	2.849e-26	7	3.4	5.2	6.5	160520000	43402000	40763000	52455000	23901000	0	0	57571000	0	0	1	2	1
>AT1G14210.1 | Symbols: | Ribonuclease T2 family protein | chr1:4856902-4857941 REVERSE LENGTH=247	>AT1G14210.1 | Symbols: | Ribonuclease T2 family protein | chr1:4856902-4857941 REVERSE LENGTH=247	1	1	1	>AT1G14210.1 | Symbols: | Ribonuclease T2 family protein | chr1:4856902-4857941 REVERSE LENGTH=247	1	1	1	1	1	1	1	1	1	1	1	1	1	1	1	1	6.1	6.1	6.1	28.186	247	247	1	1	1	1	0.0046612	6.1	6.1	6.1	6.1	824530000	251180000	189390000	181910000	202040000	0	0	0	253820000	1	1	0	0
>AT1G14240.3 | Symbols: | GDA1/CD39 nucleoside phosphatase family protein | chr1:4865159-4867777 FORWARD LENGTH=479;>AT1G14240.4 | Symbols: | GDA1/CD39 nucleoside phosphatase family protein | chr1:4865159-4867777 FORWARD LENGTH=483;>AT1G14240.2 | Symbols: | GDA1/CD39 nucleoside phosphatase family protein | chr1:4865159-4867777 FORWARD LENGTH=483;>AT1G14240.1 | Symbols: | GDA1/CD39 nucleoside phos…	>AT1G14240.3 | Symbols: | GDA1/CD39 nucleoside phosphatase family protein | chr1:4865159-4867777 FORWARD LENGTH=479;>AT1G14240.4 | Symbols: | GDA1/CD39 nucleoside phosphatase family protein | chr1:4865159-4867777 FORWARD LENGTH=483;>AT1G14240.2 | Symbols: | GDA1/CD39 nucleoside phosphatase family protein | chr1:4865159-4867777 FORWARD LENGTH=483;>AT1G14240.1 | Symbols: | GDA1/CD39 nucleoside phos…	2;2;2;2	2;2;2;2	2;2;2;2	>AT1G14240.3 | Symbols: | GDA1/CD39 nucleoside phosphatase family protein | chr1:4865159-4867777 FORWARD LENGTH=479;>AT1G14240.4 | Symbols: | GDA1/CD39 nucleoside phosphatase family protein | chr1:4865159-4867777 FORWARD LENGTH=483;>AT1G14240.2 | Symbols	4	2	2	2	1	1	1	2	1	1	1	2	1	1	1	2	6.1	6.1	6.1	53.037	479	479;483;483;483	1	1	1	2	2.7862e-43	2.9	2.9	2.9	6.1	227060000	52535000	37994000	78740000	57786000	0	0	0	72593000	1	1	0	0
>AT1G14320.1 | Symbols: SAC52, RPL10, RPL10A | Ribosomal protein L16p/L10e family protein | chr1:4888270-4889408 FORWARD LENGTH=220;>AT1G14320.2 | Symbols: SAC52, RPL10A | Ribosomal protein L16p/L10e family protein | chr1:4888270-4889408 FORWARD LENGTH=163	>AT1G14320.1 | Symbols: SAC52, RPL10, RPL10A | Ribosomal protein L16p/L10e family protein | chr1:4888270-4889408 FORWARD LENGTH=220;>AT1G14320.2 | Symbols: SAC52, RPL10A | Ribosomal protein L16p/L10e family protein | chr1:4888270-4889408 FORWARD LENGTH=163	12;9	12;9	2;2	>AT1G14320.1 | Symbols: SAC52, RPL10, RPL10A | Ribosomal protein L16p/L10e family protein | chr1:4888270-4889408 FORWARD LENGTH=220;>AT1G14320.2 | Symbols: SAC52, RPL10A | Ribosomal protein L16p/L10e family protein | chr1:4888270-4889408 FORWARD LENGTH=163	2	12	12	2	6	9	10	12	6	9	10	12	1	1	1	2	42.3	42.3	4.5	24.917	220	220;163	8	15	14	21	4.75e-70	21.8	34.5	41.8	42.3	19200000000	4683100000	4700600000	4895600000	4921200000	1846500000	1089200000	9333900000	9100600000	8	3	15	18
>AT1G14360.1 | Symbols: ATUTR3, UTR3 | UDP-galactose transporter 3 | chr1:4911362-4913029 REVERSE LENGTH=331;>AT2G02810.1 | Symbols: ATUTR1, UTR1 | UDP-galactose transporter 1 | chr2:801643-803289 FORWARD LENGTH=332	>AT1G14360.1 | Symbols: ATUTR3, UTR3 | UDP-galactose transporter 3 | chr1:4911362-4913029 REVERSE LENGTH=331;>AT2G02810.1 | Symbols: ATUTR1, UTR1 | UDP-galactose transporter 1 | chr2:801643-803289 FORWARD LENGTH=332	2;1	2;1	2;1	>AT1G14360.1 | Symbols: ATUTR3, UTR3 | UDP-galactose transporter 3 | chr1:4911362-4913029 REVERSE LENGTH=331;>AT2G02810.1 | Symbols: ATUTR1, UTR1 | UDP-galactose transporter 1 | chr2:801643-803289 FORWARD LENGTH=332	2	2	2	2	1	0	1	2	1	0	1	2	1	0	1	2	7.3	7.3	7.3	36.717	331	331;332	1		1	2	0.00060633	3.3	0	3.3	7.3	172500000	83003000	0	38220000	51278000	0	0	0	64418000	1	0	0	1
>AT1G14380.2 | Symbols: IQD28 | IQ-domain 28 | chr1:4918279-4920761 REVERSE LENGTH=602;>AT1G14380.3 | Symbols: IQD28 | IQ-domain 28 | chr1:4918279-4920761 REVERSE LENGTH=664;>AT1G14380.1 | Symbols: IQD28 | IQ-domain 28 | chr1:4918279-4920761 REVERSE LENGTH=664	>AT1G14380.2 | Symbols: IQD28 | IQ-domain 28 | chr1:4918279-4920761 REVERSE LENGTH=602;>AT1G14380.3 | Symbols: IQD28 | IQ-domain 28 | chr1:4918279-4920761 REVERSE LENGTH=664;>AT1G14380.1 | Symbols: IQD28 | IQ-domain 28 | chr1:4918279-4920761 REVERSE LENGTH=664	2;2;2	2;2;2	2;2;2	>AT1G14380.2 | Symbols: IQD28 | IQ-domain 28 | chr1:4918279-4920761 REVERSE LENGTH=602;>AT1G14380.3 | Symbols: IQD28 | IQ-domain 28 | chr1:4918279-4920761 REVERSE LENGTH=664;>AT1G14380.1 | Symbols: IQD28 | IQ-domain 28 | chr1:4918279-4920761 REVERSE LENGTH	3	2	2	2	2	2	1	2	2	2	1	2	2	2	1	2	4.3	4.3	4.3	66.101	602	602;664;664	2	2	1	2	3.696e-07	4.3	4.3	2	4.3	391340000	167620000	99763000	46386000	77567000	163190000	117400000	0	0	1	1	1	0
>AT2G02760.1 | Symbols: ATUBC2, UBC2 | ubiquiting-conjugating enzyme 2 | chr2:774271-775149 FORWARD LENGTH=152;>AT1G14400.2 | Symbols: UBC1, ATUBC1 | ubiquitin carrier protein 1 | chr1:4927294-4928136 REVERSE LENGTH=152;>AT1G14400.1 | Symbols: UBC1, ATUBC1 | ubiquitin carrier protein 1 | chr1:4927294-4928136 REVERSE LENGTH=152	>AT2G02760.1 | Symbols: ATUBC2, UBC2 | ubiquiting-conjugating enzyme 2 | chr2:774271-775149 FORWARD LENGTH=152;>AT1G14400.2 | Symbols: UBC1, ATUBC1 | ubiquitin carrier protein 1 | chr1:4927294-4928136 REVERSE LENGTH=152;>AT1G14400.1 | Symbols: UBC1, ATUBC1 | ubiquitin carrier protein 1 | chr1:4927294-4928136 REVERSE LENGTH=152	1;1;1	1;1;1	1;1;1	>AT2G02760.1 | Symbols: ATUBC2, UBC2 | ubiquiting-conjugating enzyme 2 | chr2:774271-775149 FORWARD LENGTH=152;>AT1G14400.2 | Symbols: UBC1, ATUBC1 | ubiquitin carrier protein 1 | chr1:4927294-4928136 REVERSE LENGTH=152;>AT1G14400.1 | Symbols: UBC1, ATUBC1	3	1	1	1	1	1	1	1	1	1	1	1	1	1	1	1	11.2	11.2	11.2	17.279	152	152;152;152	1	1	1	1	9.4202e-06	11.2	11.2	11.2	11.2	261510000	87436000	61743000	57100000	55231000	0	0	0	69383000	0	0	1	0
>AT1G14410.1 | Symbols: ATWHY1, PTAC1, WHY1 | ssDNA-binding transcriptional regulator | chr1:4929352-4930810 REVERSE LENGTH=263	>AT1G14410.1 | Symbols: ATWHY1, PTAC1, WHY1 | ssDNA-binding transcriptional regulator | chr1:4929352-4930810 REVERSE LENGTH=263	4	4	3	>AT1G14410.1 | Symbols: ATWHY1, PTAC1, WHY1 | ssDNA-binding transcriptional regulator | chr1:4929352-4930810 REVERSE LENGTH=263	1	4	4	3	2	2	3	4	2	2	3	4	2	2	2	3	21.7	21.7	17.5	29.058	263	263	2	3	3	5	2.3443e-11	11.4	11.4	15.6	21.7	632610000	156420000	207450000	105520000	163220000	183390000	127820000	122430000	112470000	2	1	1	3
>AT2G02510.1 | Symbols: | NADH dehydrogenase (ubiquinone)s | chr2:673338-673556 FORWARD LENGTH=72;>AT1G14450.1 | Symbols: | NADH dehydrogenase (ubiquinone)s | chr1:4947337-4947558 REVERSE LENGTH=73	>AT2G02510.1 | Symbols: | NADH dehydrogenase (ubiquinone)s | chr2:673338-673556 FORWARD LENGTH=72;>AT1G14450.1 | Symbols: | NADH dehydrogenase (ubiquinone)s | chr1:4947337-4947558 REVERSE LENGTH=73	3;3	3;3	3;3	>AT2G02510.1 | Symbols: | NADH dehydrogenase (ubiquinone)s | chr2:673338-673556 FORWARD LENGTH=72;>AT1G14450.1 | Symbols: | NADH dehydrogenase (ubiquinone)s | chr1:4947337-4947558 REVERSE LENGTH=73	2	3	3	3	2	3	2	3	2	3	2	3	2	3	2	3	30.6	30.6	30.6	8.0512	72	72;73	2	3	2	3	3.253e-14	29.2	30.6	13.9	30.6	659010000	124190000	159030000	149640000	226160000	199370000	174680000	217500000	161050000	2	2	1	2
>AT1G14570.2 | Symbols: | UBX domain-containing protein | chr1:4983770-4987192 FORWARD LENGTH=468;>AT1G14570.1 | Symbols: | UBX domain-containing protein | chr1:4983770-4987192 FORWARD LENGTH=468	>AT1G14570.2 | Symbols: | UBX domain-containing protein | chr1:4983770-4987192 FORWARD LENGTH=468;>AT1G14570.1 | Symbols: | UBX domain-containing protein | chr1:4983770-4987192 FORWARD LENGTH=468	1;1	1;1	1;1	>AT1G14570.2 | Symbols: | UBX domain-containing protein | chr1:4983770-4987192 FORWARD LENGTH=468;>AT1G14570.1 | Symbols: | UBX domain-containing protein | chr1:4983770-4987192 FORWARD LENGTH=468	2	1	1	1	1	1	0	0	1	1	0	0	1	1	0	0	3.2	3.2	3.2	51.807	468	468;468	1	1			5.984e-05	3.2	3.2	0	0	62483000	26696000	35787000	0	0	0	40523000	0	0	0	1	0	0
>AT1G14610.1 | Symbols: TWN2, VALRS | valyl-tRNA synthetase / valine--tRNA ligase (VALRS) | chr1:5008502-5014486 REVERSE LENGTH=1108	>AT1G14610.1 | Symbols: TWN2, VALRS | valyl-tRNA synthetase / valine--tRNA ligase (VALRS) | chr1:5008502-5014486 REVERSE LENGTH=1108	28	28	28	>AT1G14610.1 | Symbols: TWN2, VALRS | valyl-tRNA synthetase / valine--tRNA ligase (VALRS) | chr1:5008502-5014486 REVERSE LENGTH=1108	1	28	28	28	21	21	25	23	21	21	25	23	21	21	25	23	29.2	29.2	29.2	125.92	1108	1108	27	24	29	27	3.3492e-152	22.2	23.8	26.4	23.4	12463000000	2731500000	2602300000	3369700000	3759000000	3106800000	3150900000	3662000000	4129200000	18	16	24	22
>AT1G14620.1 | Symbols: DECOY | decoy | chr1:5014948-5016501 REVERSE LENGTH=233;>AT1G14620.2 | Symbols: DECOY | decoy | chr1:5014985-5016501 REVERSE LENGTH=220	>AT1G14620.1 | Symbols: DECOY | decoy | chr1:5014948-5016501 REVERSE LENGTH=233;>AT1G14620.2 | Symbols: DECOY | decoy | chr1:5014985-5016501 REVERSE LENGTH=220	5;4	5;4	5;4	>AT1G14620.1 | Symbols: DECOY | decoy | chr1:5014948-5016501 REVERSE LENGTH=233;>AT1G14620.2 | Symbols: DECOY | decoy | chr1:5014985-5016501 REVERSE LENGTH=220	2	5	5	5	3	3	2	2	3	3	2	2	3	3	2	2	25.8	25.8	25.8	27.14	233	233;220	3	3	2	2	1.5898e-10	13.7	15.5	12	11.6	249850000	100960000	69848000	49063000	29982000	86856000	93194000	0	0	3	2	1	0
>AT1G14670.1 | Symbols: | Endomembrane protein 70 protein family | chr1:5037669-5040199 FORWARD LENGTH=592	>AT1G14670.1 | Symbols: | Endomembrane protein 70 protein family | chr1:5037669-5040199 FORWARD LENGTH=592	9	9	2	>AT1G14670.1 | Symbols: | Endomembrane protein 70 protein family | chr1:5037669-5040199 FORWARD LENGTH=592	1	9	9	2	4	7	8	8	4	7	8	8	1	2	2	2	15.5	15.5	2.5	68.083	592	592	4	7	8	10	3.9025e-29	7.1	12.5	13.5	13.5	2477700000	372560000	598840000	731940000	774420000	636570000	462570000	842050000	782640000	3	4	9	8
>AT1G14710.2 | Symbols: | hydroxyproline-rich glycoprotein family protein | chr1:5062168-5064697 REVERSE LENGTH=601;>AT1G14710.1 | Symbols: | hydroxyproline-rich glycoprotein family protein | chr1:5062168-5064697 REVERSE LENGTH=601	>AT1G14710.2 | Symbols: | hydroxyproline-rich glycoprotein family protein | chr1:5062168-5064697 REVERSE LENGTH=601;>AT1G14710.1 | Symbols: | hydroxyproline-rich glycoprotein family protein | chr1:5062168-5064697 REVERSE LENGTH=601	5;5	5;5	5;5	>AT1G14710.2 | Symbols: | hydroxyproline-rich glycoprotein family protein | chr1:5062168-5064697 REVERSE LENGTH=601;>AT1G14710.1 | Symbols: | hydroxyproline-rich glycoprotein family protein | chr1:5062168-5064697 REVERSE LENGTH=601	2	5	5	5	3	3	4	4	3	3	4	4	3	3	4	4	9	9	9	66.203	601	601;601	4	4	5	6	8.5468e-19	7.2	7.2	6.7	6.7	495540000	108960000	89998000	132400000	164180000	126140000	128840000	130660000	157330000	2	3	3	4
>AT1G14730.1 | Symbols: | Cytochrome b561/ferric reductase transmembrane protein family | chr1:5073244-5074568 FORWARD LENGTH=224	>AT1G14730.1 | Symbols: | Cytochrome b561/ferric reductase transmembrane protein family | chr1:5073244-5074568 FORWARD LENGTH=224	3	3	3	>AT1G14730.1 | Symbols: | Cytochrome b561/ferric reductase transmembrane protein family | chr1:5073244-5074568 FORWARD LENGTH=224	1	3	3	3	3	2	2	2	3	2	2	2	3	2	2	2	15.6	15.6	15.6	24.781	224	224	4	3	3	3	1.079e-76	15.6	10.3	11.2	11.2	2451400000	886060000	612540000	494280000	458520000	552440000	456780000	488390000	480380000	4	3	3	3
>AT1G14810.1 | Symbols: | semialdehyde dehydrogenase family protein | chr1:5102684-5104633 REVERSE LENGTH=375	>AT1G14810.1 | Symbols: | semialdehyde dehydrogenase family protein | chr1:5102684-5104633 REVERSE LENGTH=375	11	11	11	>AT1G14810.1 | Symbols: | semialdehyde dehydrogenase family protein | chr1:5102684-5104633 REVERSE LENGTH=375	1	11	11	11	10	9	9	8	10	9	9	8	10	9	9	8	39.5	39.5	39.5	40.745	375	375	14	14	12	11	1.5733e-194	37.3	36.5	37.3	32	8202000000	2631900000	2186000000	1810700000	1573400000	2454100000	2373200000	2067300000	2176500000	15	16	13	11
>AT1G14830.1 | Symbols: ADL1C, ADL5, DRP1C, DL1C | DYNAMIN-like 1C | chr1:5107699-5111470 REVERSE LENGTH=614	>AT1G14830.1 | Symbols: ADL1C, ADL5, DRP1C, DL1C | DYNAMIN-like 1C | chr1:5107699-5111470 REVERSE LENGTH=614	19	19	15	>AT1G14830.1 | Symbols: ADL1C, ADL5, DRP1C, DL1C | DYNAMIN-like 1C | chr1:5107699-5111470 REVERSE LENGTH=614	1	19	19	15	14	14	18	18	14	14	18	18	11	11	14	14	40.7	40.7	34.4	68.722	614	614	21	22	26	26	1.5546e-204	31.1	31.1	38.4	38.4	8529900000	2393000000	2391300000	2043600000	1702000000	2712300000	2730400000	1810900000	2019400000	21	16	24	20
>AT1G14850.1 | Symbols: NUP155 | nucleoporin 155 | chr1:5116921-5123259 REVERSE LENGTH=1464	>AT1G14850.1 | Symbols: NUP155 | nucleoporin 155 | chr1:5116921-5123259 REVERSE LENGTH=1464	11	11	11	>AT1G14850.1 | Symbols: NUP155 | nucleoporin 155 | chr1:5116921-5123259 REVERSE LENGTH=1464	1	11	11	11	8	7	10	9	8	7	10	9	8	7	10	9	10.5	10.5	10.5	160.01	1464	1464	8	8	11	10	7.8212e-85	7.7	6.7	9.6	8.8	1438800000	428980000	382130000	364680000	262990000	457230000	468550000	306090000	296980000	7	5	5	5
>AT1G14870.1 | Symbols: PCR2 | PLANT CADMIUM RESISTANCE 2 | chr1:5128591-5129458 REVERSE LENGTH=152	>AT1G14870.1 | Symbols: PCR2 | PLANT CADMIUM RESISTANCE 2 | chr1:5128591-5129458 REVERSE LENGTH=152	2	2	2	>AT1G14870.1 | Symbols: PCR2 | PLANT CADMIUM RESISTANCE 2 | chr1:5128591-5129458 REVERSE LENGTH=152	1	2	2	2	2	2	2	2	2	2	2	2	2	2	2	2	22.4	22.4	22.4	16.742	152	152	5	6	4	4	1.8345e-41	22.4	22.4	22.4	22.4	3177900000	1011900000	1044300000	596130000	525520000	784940000	1039000000	620610000	659210000	10	9	6	6
>AT1G14960.1 | Symbols: | Polyketide cyclase/dehydrase and lipid transport superfamily protein | chr1:5159334-5159992 REVERSE LENGTH=153	>AT1G14960.1 | Symbols: | Polyketide cyclase/dehydrase and lipid transport superfamily protein | chr1:5159334-5159992 REVERSE LENGTH=153	2	2	2	>AT1G14960.1 | Symbols: | Polyketide cyclase/dehydrase and lipid transport superfamily protein | chr1:5159334-5159992 REVERSE LENGTH=153	1	2	2	2	0	1	0	1	0	1	0	1	0	1	0	1	16.3	16.3	16.3	17.682	153	153		1		1	1.5982e-06	0	7.8	0	8.5	56576000	0	25229000	0	31347000	0	0	0	39379000	0	1	0	1
>AT1G14980.1 | Symbols: CPN10 | chaperonin 10 | chr1:5165930-5166654 REVERSE LENGTH=98	>AT1G14980.1 | Symbols: CPN10 | chaperonin 10 | chr1:5165930-5166654 REVERSE LENGTH=98	3	3	3	>AT1G14980.1 | Symbols: CPN10 | chaperonin 10 | chr1:5165930-5166654 REVERSE LENGTH=98	1	3	3	3	2	2	1	3	2	2	1	3	2	2	1	3	26.5	26.5	26.5	10.812	98	98	2	2	1	3	6.4245e-07	17.3	17.3	7.1	26.5	541490000	127510000	208340000	80913000	124730000	0	0	0	156690000	1	0	0	2
>AT1G15130.1 | Symbols: | Endosomal targeting BRO1-like domain-containing protein | chr1:5206217-5209848 REVERSE LENGTH=846	>AT1G15130.1 | Symbols: | Endosomal targeting BRO1-like domain-containing protein | chr1:5206217-5209848 REVERSE LENGTH=846	4	4	4	>AT1G15130.1 | Symbols: | Endosomal targeting BRO1-like domain-containing protein | chr1:5206217-5209848 REVERSE LENGTH=846	1	4	4	4	2	2	3	4	2	2	3	4	2	2	3	4	6.9	6.9	6.9	95.208	846	846	3	3	3	4	3.1229e-27	4.3	3.7	5.2	6.9	650810000	132100000	85813000	256290000	176600000	179520000	142060000	221930000	188900000	2	2	1	2
>AT1G15170.1 | Symbols: | MATE efflux family protein | chr1:5220690-5222756 FORWARD LENGTH=481	>AT1G15170.1 | Symbols: | MATE efflux family protein | chr1:5220690-5222756 FORWARD LENGTH=481	1	1	1	>AT1G15170.1 | Symbols: | MATE efflux family protein | chr1:5220690-5222756 FORWARD LENGTH=481	1	1	1	1	1	1	0	0	1	1	0	0	1	1	0	0	2.1	2.1	2.1	52.188	481	481	1	1			0.00018546	2.1	2.1	0	0	69698000	32393000	37305000	0	0	0	42242000	0	0	1	1	0	0
>AT1G15210.1 | Symbols: PDR7, ATPDR7 | pleiotropic drug resistance 7 | chr1:5231552-5236573 REVERSE LENGTH=1442	>AT1G15210.1 | Symbols: PDR7, ATPDR7 | pleiotropic drug resistance 7 | chr1:5231552-5236573 REVERSE LENGTH=1442	29	10	10	>AT1G15210.1 | Symbols: PDR7, ATPDR7 | pleiotropic drug resistance 7 | chr1:5231552-5236573 REVERSE LENGTH=1442	1	29	10	10	22	22	26	22	9	10	9	8	9	10	9	8	22.5	8.3	8.3	162.57	1442	1442	10	11	12	9	7.5816e-143	18.7	18.7	20.2	19.1	2905500000	1131800000	727820000	641360000	404440000	1010000000	862390000	612230000	571130000	6	6	8	6
>AT1G15340.2 | Symbols: MBD10 | methyl-CPG-binding domain 10 | chr1:5275895-5277474 REVERSE LENGTH=332;>AT1G15340.1 | Symbols: MBD10 | methyl-CPG-binding domain 10 | chr1:5275895-5277474 REVERSE LENGTH=384	>AT1G15340.2 | Symbols: MBD10 | methyl-CPG-binding domain 10 | chr1:5275895-5277474 REVERSE LENGTH=332;>AT1G15340.1 | Symbols: MBD10 | methyl-CPG-binding domain 10 | chr1:5275895-5277474 REVERSE LENGTH=384	1;1	1;1	1;1	>AT1G15340.2 | Symbols: MBD10 | methyl-CPG-binding domain 10 | chr1:5275895-5277474 REVERSE LENGTH=332;>AT1G15340.1 | Symbols: MBD10 | methyl-CPG-binding domain 10 | chr1:5275895-5277474 REVERSE LENGTH=384	2	1	1	1	1	1	1	1	1	1	1	1	1	1	1	1	3.9	3.9	3.9	36.502	332	332;384	1	1	1	1	5.8778e-05	3.9	3.9	3.9	3.9	158600000	59953000	35801000	36915000	25929000	0	0	0	32574000	0	1	0	0
>AT1G15390.1 | Symbols: PDF1A, ATDEF1 | peptide deformylase 1A | chr1:5294653-5295625 FORWARD LENGTH=269	>AT1G15390.1 | Symbols: PDF1A, ATDEF1 | peptide deformylase 1A | chr1:5294653-5295625 FORWARD LENGTH=269	1	1	1	>AT1G15390.1 | Symbols: PDF1A, ATDEF1 | peptide deformylase 1A | chr1:5294653-5295625 FORWARD LENGTH=269	1	1	1	1	1	1	1	1	1	1	1	1	1	1	1	1	6.3	6.3	6.3	29.995	269	269	1	1	2	1	4.3924e-18	6.3	6.3	6.3	6.3	224770000	63520000	71895000	61740000	27616000	0	0	0	34693000	1	1	1	1
>AT1G15480.1 | Symbols: | Tetratricopeptide repeat (TPR)-like superfamily protein | chr1:5318307-5320422 FORWARD LENGTH=594	>AT1G15480.1 | Symbols: | Tetratricopeptide repeat (TPR)-like superfamily protein | chr1:5318307-5320422 FORWARD LENGTH=594	3	2	2	>AT1G15480.1 | Symbols: | Tetratricopeptide repeat (TPR)-like superfamily protein | chr1:5318307-5320422 FORWARD LENGTH=594	1	3	2	2	2	3	2	1	2	2	1	1	2	2	1	1	5.7	4	4	67.531	594	594	2	2	2	1	1.644e-11	4	5.7	3.9	2.2	195240000	71129000	49268000	54317000	20529000	73918000	52999000	0	0	1	1	1	1
>AT1G15500.1 | Symbols: ATNTT2 | TLC ATP/ADP transporter | chr1:5326426-5328688 FORWARD LENGTH=618	>AT1G15500.1 | Symbols: ATNTT2 | TLC ATP/ADP transporter | chr1:5326426-5328688 FORWARD LENGTH=618	9	9	5	>AT1G15500.1 | Symbols: ATNTT2 | TLC ATP/ADP transporter | chr1:5326426-5328688 FORWARD LENGTH=618	1	9	9	5	7	8	8	8	7	8	8	8	5	5	5	5	17.6	17.6	11	67.529	618	618	14	14	11	11	1.13e-97	14.4	15.7	16.3	16.3	9186400000	2917100000	2811100000	1887500000	1570700000	2499300000	2377600000	2000900000	1975000000	14	11	9	8
>AT1G15530.1 | Symbols: | Concanavalin A-like lectin protein kinase family protein | chr1:5339961-5341931 REVERSE LENGTH=656	>AT1G15530.1 | Symbols: | Concanavalin A-like lectin protein kinase family protein | chr1:5339961-5341931 REVERSE LENGTH=656	2	2	2	>AT1G15530.1 | Symbols: | Concanavalin A-like lectin protein kinase family protein | chr1:5339961-5341931 REVERSE LENGTH=656	1	2	2	2	1	2	0	0	1	2	0	0	1	2	0	0	6.7	6.7	6.7	73.145	656	656	1	2			0.00015038	1.8	6.7	0	0	147310000	72339000	74968000	0	0	0	84889000	0	0	1	2	0	0
>AT1G15690.1 | Symbols: AVP1, ATAVP3, AVP-3, AtVHP1;1 | Inorganic H pyrophosphatase family protein | chr1:5399115-5402185 FORWARD LENGTH=770;>AT1G15690.2 | Symbols: AVP1, ATAVP3, AVP-3, AtVHP1;1 | Inorganic H pyrophosphatase family protein | chr1:5399115-5402185 FORWARD LENGTH=642	>AT1G15690.1 | Symbols: AVP1, ATAVP3, AVP-3, AtVHP1;1 | Inorganic H pyrophosphatase family protein | chr1:5399115-5402185 FORWARD LENGTH=770;>AT1G15690.2 | Symbols: AVP1, ATAVP3, AVP-3, AtVHP1;1 | Inorganic H pyrophosphatase family protein | chr1:5399115-5402185 FORWARD LENGTH=642	18;11	18;11	18;11	>AT1G15690.1 | Symbols: AVP1, ATAVP3, AVP-3, AtVHP1;1 | Inorganic H pyrophosphatase family protein | chr1:5399115-5402185 FORWARD LENGTH=770;>AT1G15690.2 | Symbols: AVP1, ATAVP3, AVP-3, AtVHP1;1 | Inorganic H pyrophosphatase family protein | chr1:5399115-5	2	18	18	18	16	15	13	16	16	15	13	16	16	15	13	16	23	23	23	80.819	770	770;642	24	20	23	22	5.4256e-159	21.9	20.9	15.8	17.9	39250000000	10663000000	12058000000	8733900000	7794900000	12415000000	12904000000	9282000000	8532200000	16	16	19	19
>AT1G15710.1 | Symbols: | prephenate dehydrogenase family protein | chr1:5404505-5405581 FORWARD LENGTH=358	>AT1G15710.1 | Symbols: | prephenate dehydrogenase family protein | chr1:5404505-5405581 FORWARD LENGTH=358	2	2	2	>AT1G15710.1 | Symbols: | prephenate dehydrogenase family protein | chr1:5404505-5405581 FORWARD LENGTH=358	1	2	2	2	2	2	1	1	2	2	1	1	2	2	1	1	6.7	6.7	6.7	40.633	358	358	2	2	1	1	6.5755e-06	6.7	6.7	3.1	3.1	148630000	51490000	48285000	28451000	20404000	53166000	53000000	0	0	1	1	0	0
>AT1G15820.1 | Symbols: LHCB6, CP24 | light harvesting complex photosystem II subunit 6 | chr1:5446685-5447676 REVERSE LENGTH=258	>AT1G15820.1 | Symbols: LHCB6, CP24 | light harvesting complex photosystem II subunit 6 | chr1:5446685-5447676 REVERSE LENGTH=258	4	4	4	>AT1G15820.1 | Symbols: LHCB6, CP24 | light harvesting complex photosystem II subunit 6 | chr1:5446685-5447676 REVERSE LENGTH=258	1	4	4	4	4	4	3	4	4	4	3	4	4	4	3	4	22.9	22.9	22.9	27.522	258	258	6	4	3	5	1.7317e-43	22.9	22.9	21.7	22.9	1827600000	699190000	584940000	290030000	253470000	648610000	663680000	308240000	318400000	5	5	2	4
>AT1G15860.2 | Symbols: | Domain of unknown function (DUF298) | chr1:5455055-5456741 FORWARD LENGTH=227;>AT1G15860.1 | Symbols: | Domain of unknown function (DUF298) | chr1:5455055-5456741 FORWARD LENGTH=227;>AT1G15860.3 | Symbols: | Domain of unknown function (DUF298) | chr1:5455055-5456741 FORWARD LENGTH=236	>AT1G15860.2 | Symbols: | Domain of unknown function (DUF298) | chr1:5455055-5456741 FORWARD LENGTH=227;>AT1G15860.1 | Symbols: | Domain of unknown function (DUF298) | chr1:5455055-5456741 FORWARD LENGTH=227;>AT1G15860.3 | Symbols: | Domain of unknown function (DUF298) | chr1:5455055-5456741 FORWARD LENGTH=236	2;2;2	2;2;2	2;2;2	>AT1G15860.2 | Symbols: | Domain of unknown function (DUF298) | chr1:5455055-5456741 FORWARD LENGTH=227;>AT1G15860.1 | Symbols: | Domain of unknown function (DUF298) | chr1:5455055-5456741 FORWARD LENGTH=227;>AT1G15860.3 | Symbols: | Domain of unknown f	3	2	2	2	0	0	2	1	0	0	2	1	0	0	2	1	9.3	9.3	9.3	26.64	227	227;227;236			2	1	0.00016028	0	0	9.3	4.8	51632000	0	0	22093000	29539000	0	0	24248000	0	0	0	1	1
>AT1G15880.1 | Symbols: GOS11, atgos11 | golgi snare 11 | chr1:5458718-5460089 REVERSE LENGTH=223	>AT1G15880.1 | Symbols: GOS11, atgos11 | golgi snare 11 | chr1:5458718-5460089 REVERSE LENGTH=223	2	2	2	>AT1G15880.1 | Symbols: GOS11, atgos11 | golgi snare 11 | chr1:5458718-5460089 REVERSE LENGTH=223	1	2	2	2	2	1	2	0	2	1	2	0	2	1	2	0	15.7	15.7	15.7	25.213	223	223	2	1	2		2.0386e-12	15.7	10.3	15.7	0	101050000	51774000	21381000	27893000	0	54302000	0	28085000	0	2	0	0	0
>AT1G15930.2 | Symbols: | Ribosomal protein L7Ae/L30e/S12e/Gadd45 family protein | chr1:5471702-5472741 FORWARD LENGTH=144;>AT1G15930.1 | Symbols: | Ribosomal protein L7Ae/L30e/S12e/Gadd45 family protein | chr1:5471702-5472741 FORWARD LENGTH=144	>AT1G15930.2 | Symbols: | Ribosomal protein L7Ae/L30e/S12e/Gadd45 family protein | chr1:5471702-5472741 FORWARD LENGTH=144;>AT1G15930.1 | Symbols: | Ribosomal protein L7Ae/L30e/S12e/Gadd45 family protein | chr1:5471702-5472741 FORWARD LENGTH=144	7;7	7;7	5;5	>AT1G15930.2 | Symbols: | Ribosomal protein L7Ae/L30e/S12e/Gadd45 family protein | chr1:5471702-5472741 FORWARD LENGTH=144;>AT1G15930.1 | Symbols: | Ribosomal protein L7Ae/L30e/S12e/Gadd45 family protein | chr1:5471702-5472741 FORWARD LENGTH=144	2	7	7	5	4	5	6	5	4	5	6	5	3	5	4	3	70.1	70.1	57.6	15.377	144	144;144	5	6	8	8	2.283e-26	34	57.6	63.9	54.2	2543000000	194710000	1108000000	635140000	605110000	650400000	899480000	833660000	483700000	3	3	4	2
>AT1G15950.2 | Symbols: CCR1, IRX4, ATCCR1 | cinnamoyl coa reductase 1 | chr1:5478855-5481949 FORWARD LENGTH=337;>AT1G15950.1 | Symbols: CCR1, IRX4, ATCCR1 | cinnamoyl coa reductase 1 | chr1:5478855-5481915 FORWARD LENGTH=344	>AT1G15950.2 | Symbols: CCR1, IRX4, ATCCR1 | cinnamoyl coa reductase 1 | chr1:5478855-5481949 FORWARD LENGTH=337;>AT1G15950.1 | Symbols: CCR1, IRX4, ATCCR1 | cinnamoyl coa reductase 1 | chr1:5478855-5481915 FORWARD LENGTH=344	4;4	4;4	4;4	>AT1G15950.2 | Symbols: CCR1, IRX4, ATCCR1 | cinnamoyl coa reductase 1 | chr1:5478855-5481949 FORWARD LENGTH=337;>AT1G15950.1 | Symbols: CCR1, IRX4, ATCCR1 | cinnamoyl coa reductase 1 | chr1:5478855-5481915 FORWARD LENGTH=344	2	4	4	4	3	3	3	3	3	3	3	3	3	3	3	3	16	16	16	37.186	337	337;344	3	3	3	3	6.9471e-28	12.8	12.8	12.2	12.2	306800000	50424000	56178000	111230000	88961000	55904000	78226000	108900000	104850000	2	1	3	1
>AT1G80890.1 | Symbols: | unknown protein; BEST Arabidopsis thaliana protein match is: unknown protein (TAIR:AT1G16000.1); Has 41 Blast hits to 40 proteins in 10 species: Archae - 0; Bacteria - 0; Metazoa - 0; Fungi - 0; Plants - 41; Viruses - 0; Other Eukaryotes - 0 (source: NCBI BLink). | chr1:30397211-30397875 FORWARD LENGTH=80;>AT1G16000.1 | Symbols: | unknown protein; BEST Arabidopsis thalia…	>AT1G80890.1 | Symbols: | unknown protein; BEST Arabidopsis thaliana protein match is: unknown protein (TAIR:AT1G16000.1); Has 41 Blast hits to 40 proteins in 10 species: Archae - 0; Bacteria - 0; Metazoa - 0; Fungi - 0; Plants - 41; Viruses - 0; Other Eukaryotes - 0 (source: NCBI BLink). | chr1:30397211-30397875 FORWARD LENGTH=80;>AT1G16000.1 | Symbols: | unknown protein; BEST Arabidopsis thalia…	1;1	1;1	1;1	>AT1G80890.1 | Symbols: | unknown protein; BEST Arabidopsis thaliana protein match is: unknown protein (TAIR:AT1G16000.1); Has 41 Blast hits to 40 proteins in 10 species: Archae - 0; Bacteria - 0; Metazoa - 0; Fungi - 0; Plants - 41; Viruses - 0; Other Eu	2	1	1	1	1	1	1	1	1	1	1	1	1	1	1	1	12.5	12.5	12.5	8.8089	80	80;86	2	2	2	2	4.7841e-05	12.5	12.5	12.5	12.5	764440000	317580000	189940000	140480000	116440000	310900000	239690000	144130000	138400000	1	0	2	2
>AT1G16020.2 | Symbols: | Protein of unknown function (DUF1712) | chr1:5498633-5501018 FORWARD LENGTH=502;>AT1G16020.1 | Symbols: | Protein of unknown function (DUF1712) | chr1:5498633-5501018 FORWARD LENGTH=515;>AT1G80910.1 | Symbols: | Protein of unknown function (DUF1712) | chr1:30401143-30403466 FORWARD LENGTH=497	>AT1G16020.2 | Symbols: | Protein of unknown function (DUF1712) | chr1:5498633-5501018 FORWARD LENGTH=502;>AT1G16020.1 | Symbols: | Protein of unknown function (DUF1712) | chr1:5498633-5501018 FORWARD LENGTH=515;>AT1G80910.1 | Symbols: | Protein of unknown function (DUF1712) | chr1:30401143-30403466 FORWARD LENGTH=497	2;2;1	2;2;1	2;2;1	>AT1G16020.2 | Symbols: | Protein of unknown function (DUF1712) | chr1:5498633-5501018 FORWARD LENGTH=502;>AT1G16020.1 | Symbols: | Protein of unknown function (DUF1712) | chr1:5498633-5501018 FORWARD LENGTH=515;>AT1G80910.1 | Symbols: | Protein of unkn	3	2	2	2	1	2	1	1	1	2	1	1	1	2	1	1	5	5	5	56.322	502	502;515;497	1	2	1	1	8.1994e-19	2	5	3	3	72577000	0	9016300	39411000	24150000	0	0	0	30338000	0	0	1	1
>AT1G16180.2 | Symbols: | Serinc-domain containing serine and sphingolipid biosynthesis protein | chr1:5540905-5542670 FORWARD LENGTH=412;>AT1G16180.1 | Symbols: | Serinc-domain containing serine and sphingolipid biosynthesis protein | chr1:5540905-5542670 FORWARD LENGTH=412	>AT1G16180.2 | Symbols: | Serinc-domain containing serine and sphingolipid biosynthesis protein | chr1:5540905-5542670 FORWARD LENGTH=412;>AT1G16180.1 | Symbols: | Serinc-domain containing serine and sphingolipid biosynthesis protein | chr1:5540905-5542670 FORWARD LENGTH=412	1;1	1;1	1;1	>AT1G16180.2 | Symbols: | Serinc-domain containing serine and sphingolipid biosynthesis protein | chr1:5540905-5542670 FORWARD LENGTH=412;>AT1G16180.1 | Symbols: | Serinc-domain containing serine and sphingolipid biosynthesis protein | chr1:5540905-55426	2	1	1	1	1	1	0	0	1	1	0	0	1	1	0	0	3.6	3.6	3.6	45.954	412	412;412	1	1			0.00097781	3.6	3.6	0	0	33359000	15737000	17622000	0	0	0	19954000	0	0	1	0	0	0
>AT1G16240.3 | Symbols: SYP51, ATSYP51 | syntaxin of plants 51 | chr1:5555193-5556340 REVERSE LENGTH=228;>AT1G16240.2 | Symbols: SYP51, ATSYP51 | syntaxin of plants 51 | chr1:5555183-5556340 REVERSE LENGTH=232;>AT1G16240.1 | Symbols: SYP51, ATSYP51 | syntaxin of plants 51 | chr1:5555183-5556340 REVERSE LENGTH=232	>AT1G16240.3 | Symbols: SYP51, ATSYP51 | syntaxin of plants 51 | chr1:5555193-5556340 REVERSE LENGTH=228;>AT1G16240.2 | Symbols: SYP51, ATSYP51 | syntaxin of plants 51 | chr1:5555183-5556340 REVERSE LENGTH=232;>AT1G16240.1 | Symbols: SYP51, ATSYP51 | syntaxin of plants 51 | chr1:5555183-5556340 REVERSE LENGTH=232	5;5;5	5;5;5	5;5;5	>AT1G16240.3 | Symbols: SYP51, ATSYP51 | syntaxin of plants 51 | chr1:5555193-5556340 REVERSE LENGTH=228;>AT1G16240.2 | Symbols: SYP51, ATSYP51 | syntaxin of plants 51 | chr1:5555183-5556340 REVERSE LENGTH=232;>AT1G16240.1 | Symbols: SYP51, ATSYP51 | synta	3	5	5	5	2	4	4	4	2	4	4	4	2	4	4	4	30.7	30.7	30.7	25.523	228	228;232;232	2	4	4	4	1.4625e-41	10.5	23.7	23.7	23.7	616600000	104760000	180250000	180120000	151470000	0	205930000	190990000	195160000	0	2	3	3
>AT1G16300.1 | Symbols: GAPCP-2 | glyceraldehyde-3-phosphate dehydrogenase of plastid 2 | chr1:5574433-5577406 FORWARD LENGTH=420	>AT1G16300.1 | Symbols: GAPCP-2 | glyceraldehyde-3-phosphate dehydrogenase of plastid 2 | chr1:5574433-5577406 FORWARD LENGTH=420	7	1	1	>AT1G16300.1 | Symbols: GAPCP-2 | glyceraldehyde-3-phosphate dehydrogenase of plastid 2 | chr1:5574433-5577406 FORWARD LENGTH=420	1	7	1	1	5	5	7	6	1	1	1	1	1	1	1	1	26.4	4.8	4.8	44.845	420	420	1	1	2	1	3.2035e-104	20.7	20.7	26.4	22.6	127500000	34213000	22604000	52137000	18549000	0	0	0	23302000	1	1	1	1
>AT1G16340.3 | Symbols: ATKDSA2, ATKSDA | Aldolase superfamily protein | chr1:5588123-5590469 REVERSE LENGTH=291;>AT1G16340.2 | Symbols: ATKDSA2, ATKSDA | Aldolase superfamily protein | chr1:5588123-5590469 REVERSE LENGTH=291;>AT1G16340.1 | Symbols: ATKDSA2, ATKSDA | Aldolase superfamily protein | chr1:5588123-5590469 REVERSE LENGTH=291;>AT1G16340.4 | Symbols: ATKDSA2 | Aldolase superfamily prote…	>AT1G16340.3 | Symbols: ATKDSA2, ATKSDA | Aldolase superfamily protein | chr1:5588123-5590469 REVERSE LENGTH=291;>AT1G16340.2 | Symbols: ATKDSA2, ATKSDA | Aldolase superfamily protein | chr1:5588123-5590469 REVERSE LENGTH=291;>AT1G16340.1 | Symbols: ATKDSA2, ATKSDA | Aldolase superfamily protein | chr1:5588123-5590469 REVERSE LENGTH=291;>AT1G16340.4 | Symbols: ATKDSA2 | Aldolase superfamily prote…	8;8;8;8	4;4;4;4	4;4;4;4	>AT1G16340.3 | Symbols: ATKDSA2, ATKSDA | Aldolase superfamily protein | chr1:5588123-5590469 REVERSE LENGTH=291;>AT1G16340.2 | Symbols: ATKDSA2, ATKSDA | Aldolase superfamily protein | chr1:5588123-5590469 REVERSE LENGTH=291;>AT1G16340.1 | Symbols: ATKDSA	4	8	4	4	7	4	4	6	3	1	1	3	3	1	1	3	34	20.3	20.3	31.675	291	291;291;291;293	3	1	1	3	8.4513e-52	29.9	18.2	21.3	29.9	282380000	107480000	35453000	45211000	94234000	74526000	0	0	151340000	2	1	1	3
>AT1G16350.1 | Symbols: | Aldolase-type TIM barrel family protein | chr1:5590951-5592872 FORWARD LENGTH=502	>AT1G16350.1 | Symbols: | Aldolase-type TIM barrel family protein | chr1:5590951-5592872 FORWARD LENGTH=502	6	6	5	>AT1G16350.1 | Symbols: | Aldolase-type TIM barrel family protein | chr1:5590951-5592872 FORWARD LENGTH=502	1	6	6	5	5	5	5	5	5	5	5	5	4	4	4	5	22.3	22.3	19.9	54.051	502	502	6	6	5	6	2.7812e-46	17.5	18.7	17.5	19.9	2920700000	1026600000	970940000	484050000	439100000	851100000	1195700000	465480000	696640000	4	4	1	5
>AT1G16410.2 | Symbols: CYP79F1, BUS1, SPS1 | cytochrome p450 79f1 | chr1:5608862-5610244 FORWARD LENGTH=423;>AT1G16400.1 | Symbols: CYP79F2 | cytochrome P450, family 79, subfamily F, polypeptide 2 | chr1:5605231-5607281 FORWARD LENGTH=537;>AT1G16410.1 | Symbols: CYP79F1, BUS1, SPS1 | cytochrome p450 79f1 | chr1:5608862-5611118 FORWARD LENGTH=538	>AT1G16410.2 | Symbols: CYP79F1, BUS1, SPS1 | cytochrome p450 79f1 | chr1:5608862-5610244 FORWARD LENGTH=423;>AT1G16400.1 | Symbols: CYP79F2 | cytochrome P450, family 79, subfamily F, polypeptide 2 | chr1:5605231-5607281 FORWARD LENGTH=537;>AT1G16410.1 | Symbols: CYP79F1, BUS1, SPS1 | cytochrome p450 79f1 | chr1:5608862-5611118 FORWARD LENGTH=538	2;2;2	2;2;2	2;2;2	>AT1G16410.2 | Symbols: CYP79F1, BUS1, SPS1 | cytochrome p450 79f1 | chr1:5608862-5610244 FORWARD LENGTH=423;>AT1G16400.1 | Symbols: CYP79F2 | cytochrome P450, family 79, subfamily F, polypeptide 2 | chr1:5605231-5607281 FORWARD LENGTH=537;>AT1G16410.1 | S	3	2	2	2	2	1	2	1	2	1	2	1	2	1	2	1	6.1	6.1	6.1	48.731	423	423;537;538	2	1	2	1	0.00099158	6.1	2.8	6.1	3.3	121100000	44904000	44556000	22546000	9089900	0	0	24745000	0	1	0	0	1
>AT1G16460.4 | Symbols: RDH2 | rhodanese homologue 2 | chr1:5619848-5621981 REVERSE LENGTH=318;>AT1G16460.3 | Symbols: ATRDH2, ATMST2, MST2, ST2, STR2, RDH2 | rhodanese homologue 2 | chr1:5619848-5621981 REVERSE LENGTH=318;>AT1G16460.1 | Symbols: ATRDH2, ATMST2, MST2, ST2, STR2, RDH2 | rhodanese homologue 2 | chr1:5619848-5621981 REVERSE LENGTH=318;>AT1G16460.2 | Symbols: ATRDH2, ATMST2, MST2, ST…	>AT1G16460.4 | Symbols: RDH2 | rhodanese homologue 2 | chr1:5619848-5621981 REVERSE LENGTH=318;>AT1G16460.3 | Symbols: ATRDH2, ATMST2, MST2, ST2, STR2, RDH2 | rhodanese homologue 2 | chr1:5619848-5621981 REVERSE LENGTH=318;>AT1G16460.1 | Symbols: ATRDH2, ATMST2, MST2, ST2, STR2, RDH2 | rhodanese homologue 2 | chr1:5619848-5621981 REVERSE LENGTH=318;>AT1G16460.2 | Symbols: ATRDH2, ATMST2, MST2, ST…	3;3;3;3	3;3;3;3	3;3;3;3	>AT1G16460.4 | Symbols: RDH2 | rhodanese homologue 2 | chr1:5619848-5621981 REVERSE LENGTH=318;>AT1G16460.3 | Symbols: ATRDH2, ATMST2, MST2, ST2, STR2, RDH2 | rhodanese homologue 2 | chr1:5619848-5621981 REVERSE LENGTH=318;>AT1G16460.1 | Symbols: ATRDH2, A	4	3	3	3	2	2	2	2	2	2	2	2	2	2	2	2	14.8	14.8	14.8	34.717	318	318;318;318;342	2	2	2	2	1.313e-08	7.9	7.9	11.6	11.6	314920000	95651000	88795000	69998000	60473000	0	0	76044000	76751000	1	0	1	2
>AT1G16560.3 | Symbols: | Per1-like family protein | chr1:5668945-5670343 FORWARD LENGTH=342;>AT1G16560.2 | Symbols: | Per1-like family protein | chr1:5668945-5670343 FORWARD LENGTH=342;>AT1G16560.1 | Symbols: | Per1-like family protein | chr1:5668945-5670343 FORWARD LENGTH=342	>AT1G16560.3 | Symbols: | Per1-like family protein | chr1:5668945-5670343 FORWARD LENGTH=342;>AT1G16560.2 | Symbols: | Per1-like family protein | chr1:5668945-5670343 FORWARD LENGTH=342;>AT1G16560.1 | Symbols: | Per1-like family protein | chr1:5668945-5670343 FORWARD LENGTH=342	1;1;1	1;1;1	1;1;1	>AT1G16560.3 | Symbols: | Per1-like family protein | chr1:5668945-5670343 FORWARD LENGTH=342;>AT1G16560.2 | Symbols: | Per1-like family protein | chr1:5668945-5670343 FORWARD LENGTH=342;>AT1G16560.1 | Symbols: | Per1-like family protein | chr1:5668945-5	3	1	1	1	1	1	1	1	1	1	1	1	1	1	1	1	3.8	3.8	3.8	39.374	342	342;342;342	1	1	1	1	5.2861e-08	3.8	3.8	3.8	3.8	135050000	52804000	33056000	24476000	24717000	0	0	0	31051000	0	1	1	0
>AT1G16570.1 | Symbols: | UDP-Glycosyltransferase superfamily protein | chr1:5670763-5673423 REVERSE LENGTH=465;>AT1G16570.2 | Symbols: | UDP-Glycosyltransferase superfamily protein | chr1:5670763-5673423 REVERSE LENGTH=496	>AT1G16570.1 | Symbols: | UDP-Glycosyltransferase superfamily protein | chr1:5670763-5673423 REVERSE LENGTH=465;>AT1G16570.2 | Symbols: | UDP-Glycosyltransferase superfamily protein | chr1:5670763-5673423 REVERSE LENGTH=496	1;1	1;1	1;1	>AT1G16570.1 | Symbols: | UDP-Glycosyltransferase superfamily protein | chr1:5670763-5673423 REVERSE LENGTH=465;>AT1G16570.2 | Symbols: | UDP-Glycosyltransferase superfamily protein | chr1:5670763-5673423 REVERSE LENGTH=496	2	1	1	1	0	1	0	1	0	1	0	1	0	1	0	1	3.9	3.9	3.9	52.32	465	465;496		1		1	7.485e-06	0	3.9	0	3.9	23398000	0	3985100	0	19413000	0	0	0	24387000	0	0	0	1
>AT1G16610.2 | Symbols: SR45, RNPS1 | arginine/serine-rich 45 | chr1:5675925-5678686 REVERSE LENGTH=407;>AT1G16610.1 | Symbols: SR45, RNPS1 | arginine/serine-rich 45 | chr1:5675925-5678686 REVERSE LENGTH=414;>AT1G16610.3 | Symbols: SR45 | arginine/serine-rich 45 | chr1:5675925-5678686 REVERSE LENGTH=425	>AT1G16610.2 | Symbols: SR45, RNPS1 | arginine/serine-rich 45 | chr1:5675925-5678686 REVERSE LENGTH=407;>AT1G16610.1 | Symbols: SR45, RNPS1 | arginine/serine-rich 45 | chr1:5675925-5678686 REVERSE LENGTH=414;>AT1G16610.3 | Symbols: SR45 | arginine/serine-rich 45 | chr1:5675925-5678686 REVERSE LENGTH=425	1;1;1	1;1;1	1;1;1	>AT1G16610.2 | Symbols: SR45, RNPS1 | arginine/serine-rich 45 | chr1:5675925-5678686 REVERSE LENGTH=407;>AT1G16610.1 | Symbols: SR45, RNPS1 | arginine/serine-rich 45 | chr1:5675925-5678686 REVERSE LENGTH=414;>AT1G16610.3 | Symbols: SR45 | arginine/serine-r	3	1	1	1	1	1	1	1	1	1	1	1	1	1	1	1	3.2	3.2	3.2	44.648	407	407;414;425	2	1	1	1	2.816e-05	3.2	3.2	3.2	3.2	367450000	152440000	74260000	79477000	61279000	0	0	0	76981000	1	1	1	1
>AT1G16670.1 | Symbols: | Protein kinase superfamily protein | chr1:5697846-5699492 FORWARD LENGTH=390	>AT1G16670.1 | Symbols: | Protein kinase superfamily protein | chr1:5697846-5699492 FORWARD LENGTH=390	3	3	3	>AT1G16670.1 | Symbols: | Protein kinase superfamily protein | chr1:5697846-5699492 FORWARD LENGTH=390	1	3	3	3	1	2	1	1	1	2	1	1	1	2	1	1	10.3	10.3	10.3	43.289	390	390	1	2	1	1	6.6028e-22	3.8	6.7	3.8	3.6	186920000	18803000	128590000	23466000	16056000	0	145610000	0	0	1	2	0	1
>AT1G16700.1 | Symbols: | Alpha-helical ferredoxin | chr1:5710012-5711694 FORWARD LENGTH=222	>AT1G16700.1 | Symbols: | Alpha-helical ferredoxin | chr1:5710012-5711694 FORWARD LENGTH=222	4	2	2	>AT1G16700.1 | Symbols: | Alpha-helical ferredoxin | chr1:5710012-5711694 FORWARD LENGTH=222	1	4	2	2	3	3	4	3	2	2	2	2	2	2	2	2	20.7	9	9	25.377	222	222	3	3	2	3	7.8398e-25	13.1	13.1	20.7	13.1	603330000	185910000	113530000	166110000	137770000	173480000	133070000	235410000	127890000	2	2	3	3
>AT1G16790.1 | Symbols: | ribosomal protein-related | chr1:5744638-5745072 FORWARD LENGTH=144	>AT1G16790.1 | Symbols: | ribosomal protein-related | chr1:5744638-5745072 FORWARD LENGTH=144	1	1	1	>AT1G16790.1 | Symbols: | ribosomal protein-related | chr1:5744638-5745072 FORWARD LENGTH=144	1	1	1	1	1	0	1	0	1	0	1	0	1	0	1	0	8.3	8.3	8.3	15.454	144	144	1		1		2.9881e-07	8.3	0	8.3	0	86463000	58505000	0	27958000	0	0	0	30685000	0	1	0	0	0
>AT1G16820.2 | Symbols: | vacuolar ATP synthase catalytic subunit-related / V-ATPase-related / vacuolar proton pump-related | chr1:5757199-5758202 REVERSE LENGTH=66;>AT1G16820.1 | Symbols: | vacuolar ATP synthase catalytic subunit-related / V-ATPase-related / vacuolar proton pump-related | chr1:5757199-5758464 REVERSE LENGTH=93	>AT1G16820.2 | Symbols: | vacuolar ATP synthase catalytic subunit-related / V-ATPase-related / vacuolar proton pump-related | chr1:5757199-5758202 REVERSE LENGTH=66;>AT1G16820.1 | Symbols: | vacuolar ATP synthase catalytic subunit-related / V-ATPase-related / vacuolar proton pump-related | chr1:5757199-5758464 REVERSE LENGTH=93	1;1	1;1	1;1	>AT1G16820.2 | Symbols: | vacuolar ATP synthase catalytic subunit-related / V-ATPase-related / vacuolar proton pump-related | chr1:5757199-5758202 REVERSE LENGTH=66;>AT1G16820.1 | Symbols: | vacuolar ATP synthase catalytic subunit-related / V-ATPase-rela	2	1	1	1	1	1	1	1	1	1	1	1	1	1	1	1	22.7	22.7	22.7	7.3872	66	66;93	2	2	2	4	4.9482e-24	22.7	22.7	22.7	22.7	4253200000	184390000	338930000	1589900000	2140000000	0	485400000	883380000	3389000000	0	4	2	3
>AT1G16860.1 | Symbols: | Ubiquitin-specific protease family C19-related protein | chr1:5768280-5770183 FORWARD LENGTH=474	>AT1G16860.1 | Symbols: | Ubiquitin-specific protease family C19-related protein | chr1:5768280-5770183 FORWARD LENGTH=474	4	4	2	>AT1G16860.1 | Symbols: | Ubiquitin-specific protease family C19-related protein | chr1:5768280-5770183 FORWARD LENGTH=474	1	4	4	2	2	2	2	3	2	2	2	3	1	1	1	2	12.2	12.2	7	50.582	474	474	2	2	2	3	8.4603e-21	4	4	6.3	8.4	440240000	173150000	114160000	77548000	75387000	176010000	139340000	0	81777000	1	1	2	3
>AT1G16870.1 | Symbols: | mitochondrial 28S ribosomal protein S29-related | chr1:5770964-5773157 REVERSE LENGTH=480	>AT1G16870.1 | Symbols: | mitochondrial 28S ribosomal protein S29-related | chr1:5770964-5773157 REVERSE LENGTH=480	5	5	5	>AT1G16870.1 | Symbols: | mitochondrial 28S ribosomal protein S29-related | chr1:5770964-5773157 REVERSE LENGTH=480	1	5	5	5	2	4	4	4	2	4	4	4	2	4	4	4	17.7	17.7	17.7	53.783	480	480	3	5	5	5	4.4676e-22	8.3	12.3	15.6	15.6	675270000	106670000	235550000	155460000	177600000	158090000	220310000	171850000	216860000	0	3	2	4
>AT1G16880.2 | Symbols: | uridylyltransferase-related | chr1:5773796-5775272 FORWARD LENGTH=213;>AT1G16880.1 | Symbols: | uridylyltransferase-related | chr1:5773796-5776125 FORWARD LENGTH=290	>AT1G16880.2 | Symbols: | uridylyltransferase-related | chr1:5773796-5775272 FORWARD LENGTH=213;>AT1G16880.1 | Symbols: | uridylyltransferase-related | chr1:5773796-5776125 FORWARD LENGTH=290	1;1	1;1	1;1	>AT1G16880.2 | Symbols: | uridylyltransferase-related | chr1:5773796-5775272 FORWARD LENGTH=213;>AT1G16880.1 | Symbols: | uridylyltransferase-related | chr1:5773796-5776125 FORWARD LENGTH=290	2	1	1	1	1	1	1	0	1	1	1	0	1	1	1	0	5.6	5.6	5.6	22.673	213	213;290	1	1	1		0.0012978	5.6	5.6	5.6	0	82505000	28775000	14469000	39262000	0	0	0	43091000	0	1	0	0	0
>AT1G16890.2 | Symbols: UBC36, UBC13B | ubiquitin-conjugating enzyme 36 | chr1:5776550-5778327 REVERSE LENGTH=153;>AT1G16890.1 | Symbols: UBC36, UBC13B | ubiquitin-conjugating enzyme 36 | chr1:5776550-5777903 REVERSE LENGTH=120;>AT1G16890.3 | Symbols: UBC36 | ubiquitin-conjugating enzyme 36 | chr1:5776550-5778327 REVERSE LENGTH=162	>AT1G16890.2 | Symbols: UBC36, UBC13B | ubiquitin-conjugating enzyme 36 | chr1:5776550-5778327 REVERSE LENGTH=153;>AT1G16890.1 | Symbols: UBC36, UBC13B | ubiquitin-conjugating enzyme 36 | chr1:5776550-5777903 REVERSE LENGTH=120;>AT1G16890.3 | Symbols: UBC36 | ubiquitin-conjugating enzyme 36 | chr1:5776550-5778327 REVERSE LENGTH=162	7;6;6	7;6;6	2;1;1	>AT1G16890.2 | Symbols: UBC36, UBC13B | ubiquitin-conjugating enzyme 36 | chr1:5776550-5778327 REVERSE LENGTH=153;>AT1G16890.1 | Symbols: UBC36, UBC13B | ubiquitin-conjugating enzyme 36 | chr1:5776550-5777903 REVERSE LENGTH=120;>AT1G16890.3 | Symbols: UBC3	3	7	7	2	7	7	7	6	7	7	7	6	2	2	2	2	56.9	56.9	19.6	17.22	153	153;120;162	7	8	7	6	4.64e-61	56.9	56.9	56.9	40.5	5278300000	1632200000	1488500000	1200600000	957020000	1593400000	1634100000	1377700000	1206100000	4	5	8	5
>AT1G16900.1 | Symbols: | Alg9-like mannosyltransferase family | chr1:5779262-5782303 REVERSE LENGTH=570	>AT1G16900.1 | Symbols: | Alg9-like mannosyltransferase family | chr1:5779262-5782303 REVERSE LENGTH=570	1	1	1	>AT1G16900.1 | Symbols: | Alg9-like mannosyltransferase family | chr1:5779262-5782303 REVERSE LENGTH=570	1	1	1	1	0	0	1	1	0	0	1	1	0	0	1	1	3.2	3.2	3.2	65.083	570	570			1	1	4.2203e-06	0	0	3.2	3.2	46176000	0	0	23857000	22320000	0	0	0	28039000	0	0	0	1
>AT1G16920.1 | Symbols: RAB11, ATRABA1B, RABA1b | RAB GTPase homolog A1B | chr1:5787489-5789147 REVERSE LENGTH=216	>AT1G16920.1 | Symbols: RAB11, ATRABA1B, RABA1b | RAB GTPase homolog A1B | chr1:5787489-5789147 REVERSE LENGTH=216	10	6	5	>AT1G16920.1 | Symbols: RAB11, ATRABA1B, RABA1b | RAB GTPase homolog A1B | chr1:5787489-5789147 REVERSE LENGTH=216	1	10	6	5	8	8	9	10	6	6	5	6	5	5	4	5	46.8	24.1	20.4	24.02	216	216	7	7	6	7	2.1376e-87	33.8	33.8	43.1	46.8	7028000000	2962400000	2318900000	957070000	789660000	2566900000	2532700000	1268700000	1262200000	7	6	4	4
>AT1G17020.1 | Symbols: SRG1, ATSRG1 | senescence-related gene 1 | chr1:5820258-5821741 FORWARD LENGTH=358;>AT1G17010.1 | Symbols: | 2-oxoglutarate (2OG) and Fe(II)-dependent oxygenase superfamily protein | chr1:5817667-5819183 FORWARD LENGTH=361	>AT1G17020.1 | Symbols: SRG1, ATSRG1 | senescence-related gene 1 | chr1:5820258-5821741 FORWARD LENGTH=358	4;1	4;1	4;1	>AT1G17020.1 | Symbols: SRG1, ATSRG1 | senescence-related gene 1 | chr1:5820258-5821741 FORWARD LENGTH=358	2	4	4	4	3	4	3	3	3	4	3	3	3	4	3	3	12.8	12.8	12.8	41.039	358	358;361	3	5	4	4	6.4067e-22	9.8	12.8	9.8	9.8	904960000	199190000	354080000	185180000	166510000	229060000	215140000	233570000	181220000	3	4	2	2
>AT1G17050.1 | Symbols: SPS2 | solanesyl diphosphate synthase 2 | chr1:5829289-5831215 FORWARD LENGTH=417	>AT1G17050.1 | Symbols: SPS2 | solanesyl diphosphate synthase 2 | chr1:5829289-5831215 FORWARD LENGTH=417	2	2	2	>AT1G17050.1 | Symbols: SPS2 | solanesyl diphosphate synthase 2 | chr1:5829289-5831215 FORWARD LENGTH=417	1	2	2	2	1	1	0	1	1	1	0	1	1	1	0	1	10.8	10.8	10.8	46.044	417	417	1	1		1	4.7103e-32	7	3.8	0	7	51301000	9644300	9981700	0	31675000	0	0	0	39792000	0	1	0	1
>AT1G17070.1 | Symbols: | GC-rich sequence DNA-binding factor-like protein with Tuftelin interacting domain | chr1:5837653-5840202 FORWARD LENGTH=849	>AT1G17070.1 | Symbols: | GC-rich sequence DNA-binding factor-like protein with Tuftelin interacting domain | chr1:5837653-5840202 FORWARD LENGTH=849	3	3	3	>AT1G17070.1 | Symbols: | GC-rich sequence DNA-binding factor-like protein with Tuftelin interacting domain | chr1:5837653-5840202 FORWARD LENGTH=849	1	3	3	3	2	3	0	0	2	3	0	0	2	3	0	0	4.1	4.1	4.1	96.883	849	849	2	3			5.8114e-15	2.6	4.1	0	0	74409000	16715000	57694000	0	0	0	65329000	0	0	1	2	0	0
>AT1G17160.2 | Symbols: | pfkB-like carbohydrate kinase family protein | chr1:5867678-5869175 FORWARD LENGTH=355;>AT1G17160.1 | Symbols: | pfkB-like carbohydrate kinase family protein | chr1:5867678-5869215 FORWARD LENGTH=379	>AT1G17160.2 | Symbols: | pfkB-like carbohydrate kinase family protein | chr1:5867678-5869175 FORWARD LENGTH=355;>AT1G17160.1 | Symbols: | pfkB-like carbohydrate kinase family protein | chr1:5867678-5869215 FORWARD LENGTH=379	2;2	2;2	2;2	>AT1G17160.2 | Symbols: | pfkB-like carbohydrate kinase family protein | chr1:5867678-5869175 FORWARD LENGTH=355;>AT1G17160.1 | Symbols: | pfkB-like carbohydrate kinase family protein | chr1:5867678-5869215 FORWARD LENGTH=379	2	2	2	2	0	1	1	0	0	1	1	0	0	1	1	0	8.5	8.5	8.5	37.676	355	355;379		1	1		4.4336e-08	0	5.1	3.4	0	72849000	0	54786000	18063000	0	0	62037000	0	0	0	1	1	0
>AT1G17170.1 | Symbols: ATGSTU24, GST, GSTU24 | glutathione S-transferase TAU 24 | chr1:5869895-5870691 FORWARD LENGTH=218	>AT1G17170.1 | Symbols: ATGSTU24, GST, GSTU24 | glutathione S-transferase TAU 24 | chr1:5869895-5870691 FORWARD LENGTH=218	9	6	6	>AT1G17170.1 | Symbols: ATGSTU24, GST, GSTU24 | glutathione S-transferase TAU 24 | chr1:5869895-5870691 FORWARD LENGTH=218	1	9	6	6	8	7	9	8	5	4	6	5	5	4	6	5	35.3	27.5	27.5	25.306	218	218	7	7	8	8	7.9705e-31	32.1	26.6	35.3	32.1	7423700000	1783800000	1613500000	2008600000	2017800000	1576500000	2018400000	1932900000	2329300000	6	3	6	5
>AT1G17180.1 | Symbols: ATGSTU25, GSTU25 | glutathione S-transferase TAU 25 | chr1:5872208-5872958 FORWARD LENGTH=221;>AT1G78360.1 | Symbols: ATGSTU21, GSTU21 | glutathione S-transferase TAU 21 | chr1:29482070-29482966 REVERSE LENGTH=222	>AT1G17180.1 | Symbols: ATGSTU25, GSTU25 | glutathione S-transferase TAU 25 | chr1:5872208-5872958 FORWARD LENGTH=221	5;1	4;1	4;1	>AT1G17180.1 | Symbols: ATGSTU25, GSTU25 | glutathione S-transferase TAU 25 | chr1:5872208-5872958 FORWARD LENGTH=221	2	5	4	4	4	4	4	5	3	3	3	4	3	3	3	4	23.1	19	19	25.59	221	221;222	4	4	3	4	4.0325e-26	19.9	19.9	19.9	23.1	3758200000	982070000	821500000	955060000	999530000	675000000	322950000	1579200000	1592000000	4	3	5	4
>AT1G17190.1 | Symbols: ATGSTU26, GSTU26 | glutathione S-transferase tau 26 | chr1:5875452-5876375 FORWARD LENGTH=220	>AT1G17190.1 | Symbols: ATGSTU26, GSTU26 | glutathione S-transferase tau 26 | chr1:5875452-5876375 FORWARD LENGTH=220	5	4	4	>AT1G17190.1 | Symbols: ATGSTU26, GSTU26 | glutathione S-transferase tau 26 | chr1:5875452-5876375 FORWARD LENGTH=220	1	5	4	4	4	4	4	5	3	3	3	4	3	3	3	4	27.7	23.6	23.6	25.779	220	220	3	4	3	5	1.6328e-25	23.6	23.6	19.5	27.7	950040000	194240000	246920000	199580000	309300000	206010000	237020000	221330000	288620000	1	2	2	5
>AT1G17270.1 | Symbols: | O-fucosyltransferase family protein | chr1:5909443-5911624 REVERSE LENGTH=564;>AT5G50420.1 | Symbols: | O-fucosyltransferase family protein | chr5:20530453-20532635 REVERSE LENGTH=566	>AT1G17270.1 | Symbols: | O-fucosyltransferase family protein | chr1:5909443-5911624 REVERSE LENGTH=564	3;1	3;1	3;1	>AT1G17270.1 | Symbols: | O-fucosyltransferase family protein | chr1:5909443-5911624 REVERSE LENGTH=564	2	3	3	3	1	1	1	2	1	1	1	2	1	1	1	2	4.4	4.4	4.4	63.621	564	564;566	1	1	1	2	0.00032056	1.2	1.8	1.8	3.2	167170000	0	62077000	41394000	63698000	0	0	0	80020000	0	0	1	1
>AT1G17290.1 | Symbols: AlaAT1 | alanine aminotransferas | chr1:5922771-5926093 FORWARD LENGTH=543	>AT1G17290.1 | Symbols: AlaAT1 | alanine aminotransferas | chr1:5922771-5926093 FORWARD LENGTH=543	15	15	12	>AT1G17290.1 | Symbols: AlaAT1 | alanine aminotransferas | chr1:5922771-5926093 FORWARD LENGTH=543	1	15	15	12	9	8	15	15	9	8	15	15	6	6	12	12	40	40	31.7	59.82	543	543	12	12	22	21	5.3055e-131	20.3	16.2	40	40	11249000000	2792500000	2861600000	3043200000	2551400000	3326900000	3664900000	2591700000	2393800000	11	11	22	16
>AT1G17330.1 | Symbols: | Metal-dependent phosphohydrolase | chr1:5929966-5931595 FORWARD LENGTH=222	>AT1G17330.1 | Symbols: | Metal-dependent phosphohydrolase | chr1:5929966-5931595 FORWARD LENGTH=222	1	1	1	>AT1G17330.1 | Symbols: | Metal-dependent phosphohydrolase | chr1:5929966-5931595 FORWARD LENGTH=222	1	1	1	1	0	0	1	1	0	0	1	1	0	0	1	1	5.4	5.4	5.4	25.503	222	222			1	2	0.00561	0	0	5.4	5.4	61156000	0	0	25228000	35927000	0	0	0	28822000	0	0	1	1
>AT1G17340.1 | Symbols: | Phosphoinositide phosphatase family protein | chr1:5934129-5938391 FORWARD LENGTH=785	>AT1G17340.1 | Symbols: | Phosphoinositide phosphatase family protein | chr1:5934129-5938391 FORWARD LENGTH=785	3	3	3	>AT1G17340.1 | Symbols: | Phosphoinositide phosphatase family protein | chr1:5934129-5938391 FORWARD LENGTH=785	1	3	3	3	3	3	2	1	3	3	2	1	3	3	2	1	6.2	6.2	6.2	89.836	785	785	3	3	2	2	3.7269e-15	6.2	6.2	5	1.7	258760000	92955000	112710000	33655000	19442000	74797000	114090000	68638000	0	1	3	1	1
>AT1G17370.2 | Symbols: UBP1B | oligouridylate binding protein 1B | chr1:5951842-5954825 REVERSE LENGTH=416;>AT1G17370.1 | Symbols: UBP1B | oligouridylate binding protein 1B | chr1:5951842-5954825 REVERSE LENGTH=419;>AT1G54080.1 | Symbols: UBP1A | oligouridylate-binding protein 1A | chr1:20183923-20186824 REVERSE LENGTH=426;>AT3G14100.1 | Symbols: | RNA-binding (RRM/RBD/RNP motifs) family protein…	>AT1G17370.2 | Symbols: UBP1B | oligouridylate binding protein 1B | chr1:5951842-5954825 REVERSE LENGTH=416;>AT1G17370.1 | Symbols: UBP1B | oligouridylate binding protein 1B | chr1:5951842-5954825 REVERSE LENGTH=419;>AT1G54080.1 | Symbols: UBP1A | oligouridylate-binding protein 1A | chr1:20183923-20186824 REVERSE LENGTH=426;>AT3G14100.1 | Symbols: | RNA-binding (RRM/RBD/RNP motifs) family protein…	1;1;1;1;1	1;1;1;1;1	1;1;1;1;1	>AT1G17370.2 | Symbols: UBP1B | oligouridylate binding protein 1B | chr1:5951842-5954825 REVERSE LENGTH=416;>AT1G17370.1 | Symbols: UBP1B | oligouridylate binding protein 1B | chr1:5951842-5954825 REVERSE LENGTH=419;>AT1G54080.1 | Symbols: UBP1A | oligouri	5	1	1	1	0	1	1	0	0	1	1	0	0	1	1	0	2.6	2.6	2.6	45.733	416	416;419;426;427;430		1	1		0.00029725	0	2.6	2.6	0	59681000	0	6470400	53211000	0	0	0	58401000	0	0	0	1	0
>AT1G17470.2 | Symbols: ATDRG1, ATDRG, DRG1 | developmentally regulated G-protein 1 | chr1:6003442-6006155 FORWARD LENGTH=399;>AT1G17470.1 | Symbols: ATDRG1, ATDRG, DRG1 | developmentally regulated G-protein 1 | chr1:6003442-6006155 FORWARD LENGTH=399;>AT1G72660.3 | Symbols: | P-loop containing nucleoside triphosphate hydrolases superfamily protein | chr1:27354161-27356543 FORWARD LENGTH=399;>AT1…	>AT1G17470.2 | Symbols: ATDRG1, ATDRG, DRG1 | developmentally regulated G-protein 1 | chr1:6003442-6006155 FORWARD LENGTH=399;>AT1G17470.1 | Symbols: ATDRG1, ATDRG, DRG1 | developmentally regulated G-protein 1 | chr1:6003442-6006155 FORWARD LENGTH=399;>AT1G72660.3 | Symbols: | P-loop containing nucleoside triphosphate hydrolases superfamily protein | chr1:27354161-27356543 FORWARD LENGTH=399;>AT1…	12;12;7;7;7	12;12;7;7;7	12;12;7;7;7	>AT1G17470.2 | Symbols: ATDRG1, ATDRG, DRG1 | developmentally regulated G-protein 1 | chr1:6003442-6006155 FORWARD LENGTH=399;>AT1G17470.1 | Symbols: ATDRG1, ATDRG, DRG1 | developmentally regulated G-protein 1 | chr1:6003442-6006155 FORWARD LENGTH=399;>AT1	5	12	12	12	8	10	11	8	8	10	11	8	8	10	11	8	38.3	38.3	38.3	44.639	399	399;399;399;399;399	11	12	13	11	9.9246e-78	26.8	32.6	35.6	24.3	3038900000	945410000	769760000	601280000	722420000	862390000	706940000	746140000	1007500000	9	5	8	7
>AT1G17620.1 | Symbols: | Late embryogenesis abundant (LEA) hydroxyproline-rich glycoprotein family | chr1:6062313-6063107 FORWARD LENGTH=264	>AT1G17620.1 | Symbols: | Late embryogenesis abundant (LEA) hydroxyproline-rich glycoprotein family | chr1:6062313-6063107 FORWARD LENGTH=264	3	3	3	>AT1G17620.1 | Symbols: | Late embryogenesis abundant (LEA) hydroxyproline-rich glycoprotein family | chr1:6062313-6063107 FORWARD LENGTH=264	1	3	3	3	2	2	2	2	2	2	2	2	2	2	2	2	15.2	15.2	15.2	28.288	264	264	2	2	2	2	1.8948e-11	11.4	11.4	11.4	8.7	789070000	376130000	201140000	81960000	129840000	0	246840000	70868000	0	0	1	1	2
>AT1G17720.1 | Symbols: ATB BETA | Protein phosphatase 2A, regulatory subunit PR55 | chr1:6093949-6098065 REVERSE LENGTH=501;>AT1G17720.2 | Symbols: ATB BETA | Protein phosphatase 2A, regulatory subunit PR55 | chr1:6093949-6098065 REVERSE LENGTH=500	>AT1G17720.1 | Symbols: ATB BETA | Protein phosphatase 2A, regulatory subunit PR55 | chr1:6093949-6098065 REVERSE LENGTH=501;>AT1G17720.2 | Symbols: ATB BETA | Protein phosphatase 2A, regulatory subunit PR55 | chr1:6093949-6098065 REVERSE LENGTH=500	4;3	4;3	4;3	>AT1G17720.1 | Symbols: ATB BETA | Protein phosphatase 2A, regulatory subunit PR55 | chr1:6093949-6098065 REVERSE LENGTH=501;>AT1G17720.2 | Symbols: ATB BETA | Protein phosphatase 2A, regulatory subunit PR55 | chr1:6093949-6098065 REVERSE LENGTH=500	2	4	4	4	3	3	3	4	3	3	3	4	3	3	3	4	10.2	10.2	10.2	56.274	501	501;500	3	3	3	5	5.0742e-81	7.4	7.4	7.2	10.2	827320000	344860000	166320000	159010000	157130000	324450000	241380000	163470000	158240000	2	2	1	2
>AT1G17745.1 | Symbols: PGDH | D-3-phosphoglycerate dehydrogenase | chr1:6101157-6104979 FORWARD LENGTH=624;>AT1G17745.2 | Symbols: PGDH | D-3-phosphoglycerate dehydrogenase | chr1:6101157-6104979 FORWARD LENGTH=651	>AT1G17745.1 | Symbols: PGDH | D-3-phosphoglycerate dehydrogenase | chr1:6101157-6104979 FORWARD LENGTH=624;>AT1G17745.2 | Symbols: PGDH | D-3-phosphoglycerate dehydrogenase | chr1:6101157-6104979 FORWARD LENGTH=651	13;13	12;12	12;12	>AT1G17745.1 | Symbols: PGDH | D-3-phosphoglycerate dehydrogenase | chr1:6101157-6104979 FORWARD LENGTH=624;>AT1G17745.2 | Symbols: PGDH | D-3-phosphoglycerate dehydrogenase | chr1:6101157-6104979 FORWARD LENGTH=651	2	13	12	12	8	8	11	10	7	7	10	9	7	7	10	9	34	32.2	32.2	66.453	624	624;651	9	10	12	11	1.0981e-50	25.2	25	30.4	27.7	2366400000	670350000	590760000	628230000	477080000	745710000	759310000	504940000	618180000	7	8	8	7
>AT1G17810.1 | Symbols: BETA-TIP | beta-tonoplast intrinsic protein | chr1:6130209-6131442 FORWARD LENGTH=267;>AT1G73190.1 | Symbols: ALPHA-TIP, TIP3;1 | Aquaporin-like superfamily protein | chr1:27522155-27523171 FORWARD LENGTH=268	>AT1G17810.1 | Symbols: BETA-TIP | beta-tonoplast intrinsic protein | chr1:6130209-6131442 FORWARD LENGTH=267;>AT1G73190.1 | Symbols: ALPHA-TIP, TIP3;1 | Aquaporin-like superfamily protein | chr1:27522155-27523171 FORWARD LENGTH=268	2;2	2;2	2;2	>AT1G17810.1 | Symbols: BETA-TIP | beta-tonoplast intrinsic protein | chr1:6130209-6131442 FORWARD LENGTH=267;>AT1G73190.1 | Symbols: ALPHA-TIP, TIP3;1 | Aquaporin-like superfamily protein | chr1:27522155-27523171 FORWARD LENGTH=268	2	2	2	2	1	2	2	2	1	2	2	2	1	2	2	2	7.9	7.9	7.9	28.182	267	267;268	1	2	2	2	8.7939e-05	3.7	7.9	7.9	7.9	122300000	17970000	32370000	53617000	18347000	0	37364000	58136000	0	0	1	1	0
>AT1G17860.1 | Symbols: | Kunitz family trypsin and protease inhibitor protein | chr1:6149343-6149933 FORWARD LENGTH=196	>AT1G17860.1 | Symbols: | Kunitz family trypsin and protease inhibitor protein | chr1:6149343-6149933 FORWARD LENGTH=196	9	9	9	>AT1G17860.1 | Symbols: | Kunitz family trypsin and protease inhibitor protein | chr1:6149343-6149933 FORWARD LENGTH=196	1	9	9	9	6	7	7	7	6	7	7	7	6	7	7	7	59.7	59.7	59.7	22.081	196	196	8	9	9	9	2.3414e-86	38.8	43.9	50	49.5	6334500000	1769100000	1386600000	1606400000	1572300000	1544800000	1147100000	2211800000	2173900000	9	5	11	6
>AT1G17880.1 | Symbols: BTF3, ATBTF3 | basic transcription factor 3 | chr1:6152572-6153425 REVERSE LENGTH=165	>AT1G17880.1 | Symbols: BTF3, ATBTF3 | basic transcription factor 3 | chr1:6152572-6153425 REVERSE LENGTH=165	5	5	4	>AT1G17880.1 | Symbols: BTF3, ATBTF3 | basic transcription factor 3 | chr1:6152572-6153425 REVERSE LENGTH=165	1	5	5	4	5	5	3	4	5	5	3	4	4	4	3	4	30.3	30.3	23.6	17.946	165	165	5	5	3	4	2.717e-29	30.3	30.3	23	23.6	698490000	206410000	173250000	177370000	141470000	184170000	192330000	220540000	177920000	3	3	1	4
>AT1G17890.3 | Symbols: GER2 | NAD(P)-binding Rossmann-fold superfamily protein | chr1:6154478-6155440 REVERSE LENGTH=320;>AT1G17890.2 | Symbols: GER2 | NAD(P)-binding Rossmann-fold superfamily protein | chr1:6154478-6155440 REVERSE LENGTH=320;>AT1G17890.1 | Symbols: GER2 | NAD(P)-binding Rossmann-fold superfamily protein | chr1:6154478-6155596 REVERSE LENGTH=328	>AT1G17890.3 | Symbols: GER2 | NAD(P)-binding Rossmann-fold superfamily protein | chr1:6154478-6155440 REVERSE LENGTH=320;>AT1G17890.2 | Symbols: GER2 | NAD(P)-binding Rossmann-fold superfamily protein | chr1:6154478-6155440 REVERSE LENGTH=320;>AT1G17890.1 | Symbols: GER2 | NAD(P)-binding Rossmann-fold superfamily protein | chr1:6154478-6155596 REVERSE LENGTH=328	10;10;10	10;10;10	8;8;8	>AT1G17890.3 | Symbols: GER2 | NAD(P)-binding Rossmann-fold superfamily protein | chr1:6154478-6155440 REVERSE LENGTH=320;>AT1G17890.2 | Symbols: GER2 | NAD(P)-binding Rossmann-fold superfamily protein | chr1:6154478-6155440 REVERSE LENGTH=320;>AT1G17890.1	3	10	10	8	7	6	7	9	7	6	7	9	6	5	6	7	45.9	45.9	39.4	35.421	320	320;320;328	11	9	8	10	2.6512e-93	32.5	30	35.3	43.4	5459500000	1903600000	1248200000	1038900000	1268900000	1531700000	1383500000	1317000000	1434400000	6	4	7	8
>AT1G17980.2 | Symbols: PAPS1 | poly(A) polymerase 1 | chr1:6187742-6190318 REVERSE LENGTH=586;>AT1G17980.1 | Symbols: PAPS1 | poly(A) polymerase 1 | chr1:6187742-6191418 REVERSE LENGTH=713	>AT1G17980.2 | Symbols: PAPS1 | poly(A) polymerase 1 | chr1:6187742-6190318 REVERSE LENGTH=586;>AT1G17980.1 | Symbols: PAPS1 | poly(A) polymerase 1 | chr1:6187742-6191418 REVERSE LENGTH=713	1;1	1;1	1;1	>AT1G17980.2 | Symbols: PAPS1 | poly(A) polymerase 1 | chr1:6187742-6190318 REVERSE LENGTH=586;>AT1G17980.1 | Symbols: PAPS1 | poly(A) polymerase 1 | chr1:6187742-6191418 REVERSE LENGTH=713	2	1	1	1	0	0	1	0	0	0	1	0	0	0	1	0	2.4	2.4	2.4	66.019	586	586;713			1		0.0011296	0	0	2.4	0	0	0	0	0	0	0	0	0	0	0	0	0	0
>AT1G18070.2 | Symbols: | Translation elongation factor EF1A/initiation factor IF2gamma family protein | chr1:6214236-6218211 REVERSE LENGTH=532;>AT1G18070.1 | Symbols: | Translation elongation factor EF1A/initiation factor IF2gamma family protein | chr1:6214236-6218211 REVERSE LENGTH=532;>AT1G18070.3 | Symbols: | Translation elongation factor EF1A/initiation factor IF2gamma family protein | chr1…	>AT1G18070.2 | Symbols: | Translation elongation factor EF1A/initiation factor IF2gamma family protein | chr1:6214236-6218211 REVERSE LENGTH=532;>AT1G18070.1 | Symbols: | Translation elongation factor EF1A/initiation factor IF2gamma family protein | chr1:6214236-6218211 REVERSE LENGTH=532;>AT1G18070.3 | Symbols: | Translation elongation factor EF1A/initiation factor IF2gamma family protein | chr1…	11;11;11	11;11;11	11;11;11	>AT1G18070.2 | Symbols: | Translation elongation factor EF1A/initiation factor IF2gamma family protein | chr1:6214236-6218211 REVERSE LENGTH=532;>AT1G18070.1 | Symbols: | Translation elongation factor EF1A/initiation factor IF2gamma family protein | chr1	3	11	11	11	7	9	7	10	7	9	7	10	7	9	7	10	21.6	21.6	21.6	59.242	532	532;532;543	8	11	10	11	6.3871e-40	14.5	17.9	13.7	19.7	3273100000	835060000	1307600000	592640000	537790000	857190000	873090000	768520000	738570000	5	5	6	6
>AT1G18080.1 | Symbols: ATARCA, RACK1A_AT, RACK1A | Transducin/WD40 repeat-like superfamily protein | chr1:6222325-6223901 FORWARD LENGTH=327	>AT1G18080.1 | Symbols: ATARCA, RACK1A_AT, RACK1A | Transducin/WD40 repeat-like superfamily protein | chr1:6222325-6223901 FORWARD LENGTH=327	16	16	15	>AT1G18080.1 | Symbols: ATARCA, RACK1A_AT, RACK1A | Transducin/WD40 repeat-like superfamily protein | chr1:6222325-6223901 FORWARD LENGTH=327	1	16	16	15	8	9	16	15	8	9	16	15	7	8	15	14	55.7	55.7	52.9	35.747	327	327	17	14	29	30	1.0283e-240	29.1	31.2	55.7	55.4	18825000000	6974400000	4573000000	3790700000	3486800000	5117000000	5851100000	5147400000	4156400000	13	18	27	23
>AT1G18150.3 | Symbols: ATMPK8 | Protein kinase superfamily protein | chr1:6244641-6247582 REVERSE LENGTH=589;>AT1G18150.2 | Symbols: ATMPK8 | Protein kinase superfamily protein | chr1:6244641-6247582 REVERSE LENGTH=589;>AT1G18150.1 | Symbols: ATMPK8 | Protein kinase superfamily protein | chr1:6244641-6247582 REVERSE LENGTH=589;>AT3G18040.1 | Symbols: MPK9 | MAP kinase 9 | chr3:6174800-6178150 FO…	>AT1G18150.3 | Symbols: ATMPK8 | Protein kinase superfamily protein | chr1:6244641-6247582 REVERSE LENGTH=589;>AT1G18150.2 | Symbols: ATMPK8 | Protein kinase superfamily protein | chr1:6244641-6247582 REVERSE LENGTH=589;>AT1G18150.1 | Symbols: ATMPK8 | Protein kinase superfamily protein | chr1:6244641-6247582 REVERSE LENGTH=589	6;6;6;1	6;6;6;1	4;4;4;1	>AT1G18150.3 | Symbols: ATMPK8 | Protein kinase superfamily protein | chr1:6244641-6247582 REVERSE LENGTH=589;>AT1G18150.2 | Symbols: ATMPK8 | Protein kinase superfamily protein | chr1:6244641-6247582 REVERSE LENGTH=589;>AT1G18150.1 | Symbols: ATMPK8 | Pro	4	6	6	4	3	4	4	4	3	4	4	4	2	3	2	2	15.6	15.6	11.5	66.231	589	589;589;589;510	3	4	4	4	2.2404e-30	6.6	9.2	10.2	10.2	658750000	140630000	174440000	165710000	177980000	157530000	247220000	146370000	192480000	3	1	3	3
>AT1G18210.2 | Symbols: | Calcium-binding EF-hand family protein | chr1:6268273-6268785 REVERSE LENGTH=170;>AT1G18210.1 | Symbols: | Calcium-binding EF-hand family protein | chr1:6268273-6268785 REVERSE LENGTH=170	>AT1G18210.2 | Symbols: | Calcium-binding EF-hand family protein | chr1:6268273-6268785 REVERSE LENGTH=170;>AT1G18210.1 | Symbols: | Calcium-binding EF-hand family protein | chr1:6268273-6268785 REVERSE LENGTH=170	3;3	3;3	3;3	>AT1G18210.2 | Symbols: | Calcium-binding EF-hand family protein | chr1:6268273-6268785 REVERSE LENGTH=170;>AT1G18210.1 | Symbols: | Calcium-binding EF-hand family protein | chr1:6268273-6268785 REVERSE LENGTH=170	2	3	3	3	1	2	2	3	1	2	2	3	1	2	2	3	19.4	19.4	19.4	18.35	170	170;170	1	2	3	3	1.4928e-18	7.6	14.1	14.1	19.4	290250000	57667000	62529000	111320000	58728000	0	53913000	95030000	61072000	1	1	2	2
>AT1G18250.1 | Symbols: ATLP-1 | Pathogenesis-related thaumatin superfamily protein | chr1:6277024-6278005 REVERSE LENGTH=243;>AT1G18250.2 | Symbols: ATLP-1 | Pathogenesis-related thaumatin superfamily protein | chr1:6277024-6278005 REVERSE LENGTH=244;>AT1G73620.1 | Symbols: | Pathogenesis-related thaumatin superfamily protein | chr1:27681432-27682954 FORWARD LENGTH=264	>AT1G18250.1 | Symbols: ATLP-1 | Pathogenesis-related thaumatin superfamily protein | chr1:6277024-6278005 REVERSE LENGTH=243;>AT1G18250.2 | Symbols: ATLP-1 | Pathogenesis-related thaumatin superfamily protein | chr1:6277024-6278005 REVERSE LENGTH=244;>AT1G73620.1 | Symbols: | Pathogenesis-related thaumatin superfamily protein | chr1:27681432-27682954 FORWARD LENGTH=264	1;1;1	1;1;1	1;1;1	>AT1G18250.1 | Symbols: ATLP-1 | Pathogenesis-related thaumatin superfamily protein | chr1:6277024-6278005 REVERSE LENGTH=243;>AT1G18250.2 | Symbols: ATLP-1 | Pathogenesis-related thaumatin superfamily protein | chr1:6277024-6278005 REVERSE LENGTH=244;>AT1	3	1	1	1	0	0	0	1	0	0	0	1	0	0	0	1	7	7	7	25.906	243	243;244;264				1	0.0029777	0	0	0	7	11401000	0	0	0	11401000	0	0	0	14323000	0	0	0	1
>AT1G18260.1 | Symbols: | HCP-like superfamily protein | chr1:6279047-6282008 REVERSE LENGTH=678;>AT1G73570.1 | Symbols: | HCP-like superfamily protein | chr1:27650992-27653942 FORWARD LENGTH=604	>AT1G18260.1 | Symbols: | HCP-like superfamily protein | chr1:6279047-6282008 REVERSE LENGTH=678	5;1	5;1	5;1	>AT1G18260.1 | Symbols: | HCP-like superfamily protein | chr1:6279047-6282008 REVERSE LENGTH=678	2	5	5	5	4	3	2	2	4	3	2	2	4	3	2	2	9.6	9.6	9.6	75.941	678	678;604	4	3	2	2	1.257e-15	8.1	6.8	3.4	3.4	293040000	103830000	96584000	46847000	45784000	104050000	109150000	0	0	2	3	1	1
>AT1G18270.1 | Symbols: | ketose-bisphosphate aldolase class-II family protein | chr1:6283634-6293772 REVERSE LENGTH=1373;>AT1G18270.2 | Symbols: | ketose-bisphosphate aldolase class-II family protein | chr1:6283634-6293772 REVERSE LENGTH=1374;>AT1G18270.3 | Symbols: | ketose-bisphosphate aldolase class-II family protein | chr1:6283634-6293772 REVERSE LENGTH=1393	>AT1G18270.1 | Symbols: | ketose-bisphosphate aldolase class-II family protein | chr1:6283634-6293772 REVERSE LENGTH=1373;>AT1G18270.2 | Symbols: | ketose-bisphosphate aldolase class-II family protein | chr1:6283634-6293772 REVERSE LENGTH=1374;>AT1G18270.3 | Symbols: | ketose-bisphosphate aldolase class-II family protein | chr1:6283634-6293772 REVERSE LENGTH=1393	25;25;25	25;25;25	25;25;25	>AT1G18270.1 | Symbols: | ketose-bisphosphate aldolase class-II family protein | chr1:6283634-6293772 REVERSE LENGTH=1373;>AT1G18270.2 | Symbols: | ketose-bisphosphate aldolase class-II family protein | chr1:6283634-6293772 REVERSE LENGTH=1374;>AT1G18270	3	25	25	25	16	18	21	24	16	18	21	24	16	18	21	24	26.4	26.4	26.4	147.04	1373	1373;1374;1393	19	22	27	29	6.5399e-240	18.1	19.2	23	25.7	9925800000	2595300000	2840000000	2401400000	2089200000	3187600000	2912600000	2650500000	2268800000	16	18	25	22
>AT1G18450.1 | Symbols: ATARP4, ARP4 | actin-related protein 4 | chr1:6348199-6351766 FORWARD LENGTH=441	>AT1G18450.1 | Symbols: ATARP4, ARP4 | actin-related protein 4 | chr1:6348199-6351766 FORWARD LENGTH=441	7	7	7	>AT1G18450.1 | Symbols: ATARP4, ARP4 | actin-related protein 4 | chr1:6348199-6351766 FORWARD LENGTH=441	1	7	7	7	6	7	6	5	6	7	6	5	6	7	6	5	22	22	22	48.936	441	441	9	11	7	6	9.9506e-77	19.5	22	19.5	19	1969000000	688950000	592130000	369510000	318370000	628850000	589080000	433810000	500240000	7	9	7	5
>AT1G18480.1 | Symbols: | Calcineurin-like metallo-phosphoesterase superfamily protein | chr1:6361639-6362814 FORWARD LENGTH=391	>AT1G18480.1 | Symbols: | Calcineurin-like metallo-phosphoesterase superfamily protein | chr1:6361639-6362814 FORWARD LENGTH=391	2	2	2	>AT1G18480.1 | Symbols: | Calcineurin-like metallo-phosphoesterase superfamily protein | chr1:6361639-6362814 FORWARD LENGTH=391	1	2	2	2	0	1	1	0	0	1	1	0	0	1	1	0	5.6	5.6	5.6	43.281	391	391		1	1		0.0014016	0	2.6	3.1	0	51106000	0	36325000	14781000	0	0	0	16223000	0	0	1	1	0
>AT1G18500.1 | Symbols: MAML-4, IPMS1 | methylthioalkylmalate synthase-like 4 | chr1:6369347-6372861 FORWARD LENGTH=631	>AT1G18500.1 | Symbols: MAML-4, IPMS1 | methylthioalkylmalate synthase-like 4 | chr1:6369347-6372861 FORWARD LENGTH=631	15	15	5	>AT1G18500.1 | Symbols: MAML-4, IPMS1 | methylthioalkylmalate synthase-like 4 | chr1:6369347-6372861 FORWARD LENGTH=631	1	15	15	5	10	12	13	12	10	12	13	12	3	3	5	3	33.9	33.9	12.2	68.675	631	631	13	14	16	14	4.2522e-107	23.5	27.4	29.6	27.3	4689600000	1890900000	1197800000	838670000	762230000	1593400000	1465100000	960900000	1105800000	8	9	10	8
>AT1G18540.1 | Symbols: | Ribosomal protein L6 family protein | chr1:6377448-6378548 REVERSE LENGTH=233	>AT1G18540.1 | Symbols: | Ribosomal protein L6 family protein | chr1:6377448-6378548 REVERSE LENGTH=233	10	4	4	>AT1G18540.1 | Symbols: | Ribosomal protein L6 family protein | chr1:6377448-6378548 REVERSE LENGTH=233	1	10	4	4	9	10	10	10	4	4	4	4	4	4	4	4	42.9	18.5	18.5	26.152	233	233	6	6	7	8	2.0784e-48	36.5	42.9	42.9	42.9	6057000000	1490400000	1439300000	1831400000	1295900000	1461800000	1112300000	1773900000	1639000000	2	5	5	6
>AT1G18580.1 | Symbols: GAUT11 | galacturonosyltransferase 11 | chr1:6396144-6398005 FORWARD LENGTH=537	>AT1G18580.1 | Symbols: GAUT11 | galacturonosyltransferase 11 | chr1:6396144-6398005 FORWARD LENGTH=537	3	3	3	>AT1G18580.1 | Symbols: GAUT11 | galacturonosyltransferase 11 | chr1:6396144-6398005 FORWARD LENGTH=537	1	3	3	3	1	0	3	1	1	0	3	1	1	0	3	1	7.6	7.6	7.6	61.878	537	537	1		3	1	1.2539e-11	2.2	0	7.6	2.2	119180000	32861000	0	65615000	20700000	0	0	72015000	0	1	0	2	1
>AT1G18590.1 | Symbols: SOT17, ATSOT17, ATST5C | sulfotransferase 17 | chr1:6398634-6399674 FORWARD LENGTH=346	>AT1G18590.1 | Symbols: SOT17, ATSOT17, ATST5C | sulfotransferase 17 | chr1:6398634-6399674 FORWARD LENGTH=346	10	8	6	>AT1G18590.1 | Symbols: SOT17, ATSOT17, ATST5C | sulfotransferase 17 | chr1:6398634-6399674 FORWARD LENGTH=346	1	10	8	6	6	8	8	7	6	6	7	6	5	5	6	5	35.5	29.5	24.6	39.912	346	346	7	7	7	6	1.2896e-40	23.7	29.8	29.2	25.7	3421600000	1449600000	1380200000	301570000	290260000	1119700000	1244000000	546780000	639770000	5	4	4	3
>AT1G18630.1 | Symbols: GR-RBP6 | glycine-rich RNA-binding protein 6 | chr1:6415226-6416283 FORWARD LENGTH=155	>AT1G18630.1 | Symbols: GR-RBP6 | glycine-rich RNA-binding protein 6 | chr1:6415226-6416283 FORWARD LENGTH=155	1	1	1	>AT1G18630.1 | Symbols: GR-RBP6 | glycine-rich RNA-binding protein 6 | chr1:6415226-6416283 FORWARD LENGTH=155	1	1	1	1	1	1	1	1	1	1	1	1	1	1	1	1	10.3	10.3	10.3	15.96	155	155	1	1	1	1	5.0086e-05	10.3	10.3	10.3	10.3	287160000	130750000	65612000	44451000	46354000	0	0	0	58232000	1	1	1	0
>AT1G18640.2 | Symbols: PSP | 3-phosphoserine phosphatase | chr1:6416524-6418245 REVERSE LENGTH=295	>AT1G18640.2 | Symbols: PSP | 3-phosphoserine phosphatase | chr1:6416524-6418245 REVERSE LENGTH=295	3	3	3	>AT1G18640.2 | Symbols: PSP | 3-phosphoserine phosphatase | chr1:6416524-6418245 REVERSE LENGTH=295	1	3	3	3	3	2	3	2	3	2	3	2	3	2	3	2	12.5	12.5	12.5	32.318	295	295	3	2	3	2	4.113e-20	12.5	8.1	12.5	8.1	416130000	60833000	218350000	87003000	49946000	59323000	186810000	111470000	108710000	1	1	3	1
>AT5G07720.1 | Symbols: | Galactosyl transferase GMA12/MNN10 family protein | chr5:2455757-2457130 FORWARD LENGTH=457;>AT1G74380.1 | Symbols: XXT5 | xyloglucan xylosyltransferase 5 | chr1:27959848-27961221 FORWARD LENGTH=457;>AT1G18690.1 | Symbols: | Galactosyl transferase GMA12/MNN10 family protein | chr1:6435153-6436694 FORWARD LENGTH=513	>AT5G07720.1 | Symbols: | Galactosyl transferase GMA12/MNN10 family protein | chr5:2455757-2457130 FORWARD LENGTH=457;>AT1G74380.1 | Symbols: XXT5 | xyloglucan xylosyltransferase 5 | chr1:27959848-27961221 FORWARD LENGTH=457;>AT1G18690.1 | Symbols: | Galactosyl transferase GMA12/MNN10 family protein | chr1:6435153-6436694 FORWARD LENGTH=513	1;1;1	1;1;1	1;1;1	>AT5G07720.1 | Symbols: | Galactosyl transferase GMA12/MNN10 family protein | chr5:2455757-2457130 FORWARD LENGTH=457;>AT1G74380.1 | Symbols: XXT5 | xyloglucan xylosyltransferase 5 | chr1:27959848-27961221 FORWARD LENGTH=457;>AT1G18690.1 | Symbols: | Gal	3	1	1	1	1	1	1	1	1	1	1	1	1	1	1	1	2.4	2.4	2.4	52.367	457	457;457;513	1	1	1	1	0.0014268	2.4	2.4	2.4	2.4	382720000	142610000	106470000	55554000	78090000	0	0	0	98101000	1	0	0	1
>AT1G18700.3 | Symbols: | DNAJ heat shock N-terminal domain-containing protein | chr1:6437591-6443046 FORWARD LENGTH=695;>AT1G18700.1 | Symbols: | DNAJ heat shock N-terminal domain-containing protein | chr1:6437591-6443046 FORWARD LENGTH=700;>AT1G18700.2 | Symbols: | DNAJ heat shock N-terminal domain-containing protein | chr1:6437591-6443814 FORWARD LENGTH=705;>AT1G18700.4 | Symbols: | DNAJ heat …	>AT1G18700.3 | Symbols: | DNAJ heat shock N-terminal domain-containing protein | chr1:6437591-6443046 FORWARD LENGTH=695;>AT1G18700.1 | Symbols: | DNAJ heat shock N-terminal domain-containing protein | chr1:6437591-6443046 FORWARD LENGTH=700;>AT1G18700.2 | Symbols: | DNAJ heat shock N-terminal domain-containing protein | chr1:6437591-6443814 FORWARD LENGTH=705;>AT1G18700.4 | Symbols: | DNAJ heat …	3;3;3;3	3;3;3;3	3;3;3;3	>AT1G18700.3 | Symbols: | DNAJ heat shock N-terminal domain-containing protein | chr1:6437591-6443046 FORWARD LENGTH=695;>AT1G18700.1 | Symbols: | DNAJ heat shock N-terminal domain-containing protein | chr1:6437591-6443046 FORWARD LENGTH=700;>AT1G18700.2	4	3	3	3	3	1	2	2	3	1	2	2	3	1	2	2	7.1	7.1	7.1	78.586	695	695;700;705;715	3	1	2	2	8.8764e-10	7.1	2.2	4.9	4.9	325790000	175500000	48460000	50801000	51032000	166160000	0	62191000	67015000	3	0	0	0
>AT1G18720.1 | Symbols: | Protein of unknown function (DUF962) | chr1:6458020-6459658 REVERSE LENGTH=206	>AT1G18720.1 | Symbols: | Protein of unknown function (DUF962) | chr1:6458020-6459658 REVERSE LENGTH=206	2	2	2	>AT1G18720.1 | Symbols: | Protein of unknown function (DUF962) | chr1:6458020-6459658 REVERSE LENGTH=206	1	2	2	2	2	2	2	2	2	2	2	2	2	2	2	2	8.3	8.3	8.3	23.134	206	206	2	2	2	2	7.4415e-05	8.3	8.3	8.3	8.3	296470000	191890000	42258000	31504000	30815000	182610000	0	43859000	0	1	0	1	0
>AT1G18880.1 | Symbols: | Major facilitator superfamily protein | chr1:6520800-6523241 FORWARD LENGTH=587	>AT1G18880.1 | Symbols: | Major facilitator superfamily protein | chr1:6520800-6523241 FORWARD LENGTH=587	3	2	2	>AT1G18880.1 | Symbols: | Major facilitator superfamily protein | chr1:6520800-6523241 FORWARD LENGTH=587	1	3	2	2	2	2	2	2	1	1	2	2	1	1	2	2	6.5	4.3	4.3	65.174	587	587	1	1	2	2	9.5077e-07	3.4	3.4	4.3	4.3	122320000	18816000	15322000	51780000	36401000	0	0	57130000	45430000	0	1	0	2
>AT1G18890.1 | Symbols: ATCDPK1, CPK10, CDPK1, AtCPK10 | calcium-dependent protein kinase 1 | chr1:6523468-6525736 REVERSE LENGTH=545;>AT1G74740.1 | Symbols: CPK30, CDPK1A, ATCPK30 | calcium-dependent protein kinase 30 | chr1:28080199-28082476 REVERSE LENGTH=541	>AT1G18890.1 | Symbols: ATCDPK1, CPK10, CDPK1, AtCPK10 | calcium-dependent protein kinase 1 | chr1:6523468-6525736 REVERSE LENGTH=545;>AT1G74740.1 | Symbols: CPK30, CDPK1A, ATCPK30 | calcium-dependent protein kinase 30 | chr1:28080199-28082476 REVERSE LENGTH=541	2;1	1;1	1;1	>AT1G18890.1 | Symbols: ATCDPK1, CPK10, CDPK1, AtCPK10 | calcium-dependent protein kinase 1 | chr1:6523468-6525736 REVERSE LENGTH=545;>AT1G74740.1 | Symbols: CPK30, CDPK1A, ATCPK30 | calcium-dependent protein kinase 30 | chr1:28080199-28082476 REVERSE LENG	2	2	1	1	1	2	1	1	0	1	0	0	0	1	0	0	4.8	3.1	3.1	61.459	545	545;541		1			1.1364e-07	1.7	4.8	1.7	1.7	27601000	0	27601000	0	0	0	31254000	0	0	0	1	0	0
>AT1G18980.1 | Symbols: | RmlC-like cupins superfamily protein | chr1:6557364-6558026 REVERSE LENGTH=220	>AT1G18980.1 | Symbols: | RmlC-like cupins superfamily protein | chr1:6557364-6558026 REVERSE LENGTH=220	1	1	1	>AT1G18980.1 | Symbols: | RmlC-like cupins superfamily protein | chr1:6557364-6558026 REVERSE LENGTH=220	1	1	1	1	0	0	1	0	0	0	1	0	0	0	1	0	5.5	5.5	5.5	23.183	220	220			1		0.0013703	0	0	5.5	0	82372000	0	0	82372000	0	0	0	90407000	0	0	0	1	0
>AT1G19110.1 | Symbols: | inter-alpha-trypsin inhibitor heavy chain-related | chr1:6602270-6605766 FORWARD LENGTH=754	>AT1G19110.1 | Symbols: | inter-alpha-trypsin inhibitor heavy chain-related | chr1:6602270-6605766 FORWARD LENGTH=754	6	6	6	>AT1G19110.1 | Symbols: | inter-alpha-trypsin inhibitor heavy chain-related | chr1:6602270-6605766 FORWARD LENGTH=754	1	6	6	6	5	5	6	6	5	5	6	6	5	5	6	6	15.3	15.3	15.3	83.017	754	754	5	5	6	7	4.2999e-22	13.8	12.9	15.3	15.3	1124700000	326360000	231930000	321850000	244520000	318200000	302540000	359810000	256940000	1	3	5	2
>AT1G19140.1 | Symbols: | FUNCTIONS IN: molecular_function unknown; INVOLVED IN: ubiquinone biosynthetic process; LOCATED IN: mitochondrion; EXPRESSED IN: 24 plant structures; EXPRESSED DURING: 15 growth stages; CONTAINS InterPro DOMAIN/s: COQ9 (InterPro:IPR013718), Ubiquinone biosynthesis protein COQ9 (InterPro:IPR012762); Has 748 Blast hits to 748 proteins in 260 species: Archae - 0; Bacteria -…	>AT1G19140.1 | Symbols: | FUNCTIONS IN: molecular_function unknown; INVOLVED IN: ubiquinone biosynthetic process; LOCATED IN: mitochondrion; EXPRESSED IN: 24 plant structures; EXPRESSED DURING: 15 growth stages; CONTAINS InterPro DOMAIN/s: COQ9 (InterPro:IPR013718), Ubiquinone biosynthesis protein COQ9 (InterPro:IPR012762); Has 748 Blast hits to 748 proteins in 260 species: Archae - 0; Bacteria -…	2;2	2;2	2;2	>AT1G19140.1 | Symbols: | FUNCTIONS IN: molecular_function unknown; INVOLVED IN: ubiquinone biosynthetic process; LOCATED IN: mitochondrion; EXPRESSED IN: 24 plant structures; EXPRESSED DURING: 15 growth stages; CONTAINS InterPro DOMAIN/s: COQ9 (InterPro:	2	2	2	2	2	2	1	2	2	2	1	2	2	2	1	2	9.3	9.3	9.3	34.341	311	311;312	2	2	1	2	4.3677e-101	9.3	9.3	4.8	9.3	538760000	199400000	205010000	56563000	77784000	201580000	229960000	0	0	4	2	2	0
>AT1G19190.1 | Symbols: | alpha/beta-Hydrolases superfamily protein | chr1:6623876-6624832 FORWARD LENGTH=318	>AT1G19190.1 | Symbols: | alpha/beta-Hydrolases superfamily protein | chr1:6623876-6624832 FORWARD LENGTH=318	2	2	2	>AT1G19190.1 | Symbols: | alpha/beta-Hydrolases superfamily protein | chr1:6623876-6624832 FORWARD LENGTH=318	1	2	2	2	1	1	2	2	1	1	2	2	1	1	2	2	6.6	6.6	6.6	36.081	318	318	1	1	2	2	2.0772e-14	2.2	2.2	6.6	6.6	557110000	158660000	164740000	118000000	115710000	0	0	0	145360000	1	0	1	1
>AT1G19360.1 | Symbols: | Nucleotide-diphospho-sugar transferase family protein | chr1:6690672-6692211 REVERSE LENGTH=428;>AT1G75110.1 | Symbols: RRA2 | Nucleotide-diphospho-sugar transferase family protein | chr1:28194348-28195885 REVERSE LENGTH=428	>AT1G19360.1 | Symbols: | Nucleotide-diphospho-sugar transferase family protein | chr1:6690672-6692211 REVERSE LENGTH=428	7;1	7;1	7;1	>AT1G19360.1 | Symbols: | Nucleotide-diphospho-sugar transferase family protein | chr1:6690672-6692211 REVERSE LENGTH=428	2	7	7	7	3	4	7	7	3	4	7	7	3	4	7	7	25.2	25.2	25.2	48.251	428	428;428	3	4	7	8	3.2952e-40	9.3	11.7	25.2	25.2	1409200000	365730000	353620000	329980000	359900000	456470000	472250000	308360000	318920000	2	2	4	5
>AT1G19430.1 | Symbols: | S-adenosyl-L-methionine-dependent methyltransferases superfamily protein | chr1:6724669-6727533 REVERSE LENGTH=724	>AT1G19430.1 | Symbols: | S-adenosyl-L-methionine-dependent methyltransferases superfamily protein | chr1:6724669-6727533 REVERSE LENGTH=724	1	1	1	>AT1G19430.1 | Symbols: | S-adenosyl-L-methionine-dependent methyltransferases superfamily protein | chr1:6724669-6727533 REVERSE LENGTH=724	1	1	1	1	1	1	0	0	1	1	0	0	1	1	0	0	1.8	1.8	1.8	82.661	724	724	1	1			0.0021383	1.8	1.8	0	0	55549000	36827000	18722000	0	0	0	21199000	0	0	1	0	0	0
>AT1G19440.1 | Symbols: KCS4 | 3-ketoacyl-CoA synthase 4 | chr1:6729119-6730669 FORWARD LENGTH=516	>AT1G19440.1 | Symbols: KCS4 | 3-ketoacyl-CoA synthase 4 | chr1:6729119-6730669 FORWARD LENGTH=516	1	1	1	>AT1G19440.1 | Symbols: KCS4 | 3-ketoacyl-CoA synthase 4 | chr1:6729119-6730669 FORWARD LENGTH=516	1	1	1	1	1	1	0	1	1	1	0	1	1	1	0	1	2.7	2.7	2.7	57.841	516	516	1	1		1	0.00045169	2.7	2.7	0	2.7	98960000	32220000	27151000	0	39589000	0	0	0	49733000	1	1	0	0
>AT1G19450.1 | Symbols: | Major facilitator superfamily protein | chr1:6731671-6734633 REVERSE LENGTH=488	>AT1G19450.1 | Symbols: | Major facilitator superfamily protein | chr1:6731671-6734633 REVERSE LENGTH=488	3	2	2	>AT1G19450.1 | Symbols: | Major facilitator superfamily protein | chr1:6731671-6734633 REVERSE LENGTH=488	1	3	2	2	3	3	3	3	2	2	2	2	2	2	2	2	7	5.1	5.1	52.787	488	488	3	3	3	2	1.2509e-14	7	7	7	7	167710000	57995000	40548000	62844000	6322600	0	28259000	55010000	0	2	2	2	0
>AT1G19570.2 | Symbols: DHAR1, ATDHAR1, DHAR5 | dehydroascorbate reductase | chr1:6773462-6774413 REVERSE LENGTH=212;>AT1G19570.1 | Symbols: DHAR1, ATDHAR1, DHAR5 | dehydroascorbate reductase | chr1:6773462-6774413 REVERSE LENGTH=213;>AT1G19550.1 | Symbols: | Glutathione S-transferase family protein | chr1:6767451-6767983 REVERSE LENGTH=153	>AT1G19570.2 | Symbols: DHAR1, ATDHAR1, DHAR5 | dehydroascorbate reductase | chr1:6773462-6774413 REVERSE LENGTH=212;>AT1G19570.1 | Symbols: DHAR1, ATDHAR1, DHAR5 | dehydroascorbate reductase | chr1:6773462-6774413 REVERSE LENGTH=213	12;12;4	12;12;4	11;11;3	>AT1G19570.2 | Symbols: DHAR1, ATDHAR1, DHAR5 | dehydroascorbate reductase | chr1:6773462-6774413 REVERSE LENGTH=212;>AT1G19570.1 | Symbols: DHAR1, ATDHAR1, DHAR5 | dehydroascorbate reductase | chr1:6773462-6774413 REVERSE LENGTH=213	3	12	12	11	9	6	9	10	9	6	9	10	8	6	8	10	70.3	70.3	67	23.455	212	212;213;153	11	8	11	13	1.0158e-64	53.8	39.2	62.7	62.7	5677500000	1454500000	1164200000	1706500000	1352200000	1467200000	1531900000	1682400000	1663000000	8	5	10	10
>AT1G19580.1 | Symbols: GAMMA CA1 | gamma carbonic anhydrase 1 | chr1:6774937-6777092 FORWARD LENGTH=275;>AT1G19580.2 | Symbols: GAMMA CA1 | gamma carbonic anhydrase 1 | chr1:6774937-6776845 FORWARD LENGTH=220	>AT1G19580.1 | Symbols: GAMMA CA1 | gamma carbonic anhydrase 1 | chr1:6774937-6777092 FORWARD LENGTH=275;>AT1G19580.2 | Symbols: GAMMA CA1 | gamma carbonic anhydrase 1 | chr1:6774937-6776845 FORWARD LENGTH=220	6;4	5;3	5;3	>AT1G19580.1 | Symbols: GAMMA CA1 | gamma carbonic anhydrase 1 | chr1:6774937-6777092 FORWARD LENGTH=275;>AT1G19580.2 | Symbols: GAMMA CA1 | gamma carbonic anhydrase 1 | chr1:6774937-6776845 FORWARD LENGTH=220	2	6	5	5	5	6	4	4	4	5	3	3	4	5	3	3	40	37.1	37.1	29.971	275	275;220	5	5	4	3	4.3849e-36	29.1	40	26.5	20.4	2038500000	676720000	759290000	208690000	393750000	580030000	709360000	510250000	428360000	5	4	1	3
>AT1G19730.1 | Symbols: ATTRX4, ATH4 | Thioredoxin superfamily protein | chr1:6823163-6824020 REVERSE LENGTH=119	>AT1G19730.1 | Symbols: ATTRX4, ATH4 | Thioredoxin superfamily protein | chr1:6823163-6824020 REVERSE LENGTH=119	1	1	1	>AT1G19730.1 | Symbols: ATTRX4, ATH4 | Thioredoxin superfamily protein | chr1:6823163-6824020 REVERSE LENGTH=119	1	1	1	1	1	1	1	0	1	1	1	0	1	1	1	0	9.2	9.2	9.2	13.063	119	119	1	1	1		0.0050481	9.2	9.2	9.2	0	40967000	17290000	14275000	9401200	0	0	0	10318000	0	1	0	0	0
>AT1G19800.3 | Symbols: TGD1 | trigalactosyldiacylglycerol 1 | chr1:6846812-6847954 FORWARD LENGTH=350;>AT1G19800.2 | Symbols: TGD1 | trigalactosyldiacylglycerol 1 | chr1:6846812-6847954 FORWARD LENGTH=350;>AT1G19800.1 | Symbols: TGD1 | trigalactosyldiacylglycerol 1 | chr1:6846812-6847954 FORWARD LENGTH=350	>AT1G19800.3 | Symbols: TGD1 | trigalactosyldiacylglycerol 1 | chr1:6846812-6847954 FORWARD LENGTH=350;>AT1G19800.2 | Symbols: TGD1 | trigalactosyldiacylglycerol 1 | chr1:6846812-6847954 FORWARD LENGTH=350;>AT1G19800.1 | Symbols: TGD1 | trigalactosyldiacylglycerol 1 | chr1:6846812-6847954 FORWARD LENGTH=350	1;1;1	1;1;1	1;1;1	>AT1G19800.3 | Symbols: TGD1 | trigalactosyldiacylglycerol 1 | chr1:6846812-6847954 FORWARD LENGTH=350;>AT1G19800.2 | Symbols: TGD1 | trigalactosyldiacylglycerol 1 | chr1:6846812-6847954 FORWARD LENGTH=350;>AT1G19800.1 | Symbols: TGD1 | trigalactosyldiacyl	3	1	1	1	1	1	1	1	1	1	1	1	1	1	1	1	4	4	4	37.907	350	350;350;350	1	1	1	1	6.1314e-06	4	4	4	4	237770000	60470000	65231000	54788000	57278000	0	0	0	71956000	1	1	1	1
>AT1G19870.1 | Symbols: iqd32 | IQ-domain 32 | chr1:6895400-6898539 REVERSE LENGTH=794	>AT1G19870.1 | Symbols: iqd32 | IQ-domain 32 | chr1:6895400-6898539 REVERSE LENGTH=794	3	3	3	>AT1G19870.1 | Symbols: iqd32 | IQ-domain 32 | chr1:6895400-6898539 REVERSE LENGTH=794	1	3	3	3	2	2	3	3	2	2	3	3	2	2	3	3	6	6	6	86.881	794	794	2	2	3	3	2.8675e-09	3.3	3.3	6	6	418740000	137450000	80682000	80620000	119990000	0	125130000	70955000	134490000	0	1	2	0
>AT1G19880.1 | Symbols: | Regulator of chromosome condensation (RCC1) family protein | chr1:6900648-6903818 REVERSE LENGTH=538	>AT1G19880.1 | Symbols: | Regulator of chromosome condensation (RCC1) family protein | chr1:6900648-6903818 REVERSE LENGTH=538	6	6	6	>AT1G19880.1 | Symbols: | Regulator of chromosome condensation (RCC1) family protein | chr1:6900648-6903818 REVERSE LENGTH=538	1	6	6	6	4	4	5	4	4	4	5	4	4	4	5	4	12.8	12.8	12.8	57.841	538	538	5	5	5	5	4.4224e-90	8.2	8.4	10.6	8.9	945470000	349770000	177730000	287790000	130170000	353440000	165210000	278450000	199840000	2	1	3	3
>AT4G38920.1 | Symbols: AVA-P3, ATVHA-C3, VHA-C3 | vacuolar-type H(+)-ATPase C3 | chr4:18147330-18148853 FORWARD LENGTH=164;>AT4G34720.1 | Symbols: AVA-P1, VHA-C1, ATVHA-C1 | ATPase, F0/V0 complex, subunit C protein | chr4:16568223-16569165 REVERSE LENGTH=164;>AT2G16510.1 | Symbols: | ATPase, F0/V0 complex, subunit C protein | chr2:7160007-7160811 REVERSE LENGTH=164;>AT1G19910.1 | Symbols: AVA-P2…	>AT4G38920.1 | Symbols: AVA-P3, ATVHA-C3, VHA-C3 | vacuolar-type H(+)-ATPase C3 | chr4:18147330-18148853 FORWARD LENGTH=164;>AT4G34720.1 | Symbols: AVA-P1, VHA-C1, ATVHA-C1 | ATPase, F0/V0 complex, subunit C protein | chr4:16568223-16569165 REVERSE LENGTH=164;>AT2G16510.1 | Symbols: | ATPase, F0/V0 complex, subunit C protein | chr2:7160007-7160811 REVERSE LENGTH=164;>AT1G19910.1 | Symbols: AVA-P2…	1;1;1;1;1;1	1;1;1;1;1;1	1;1;1;1;1;1	>AT4G38920.1 | Symbols: AVA-P3, ATVHA-C3, VHA-C3 | vacuolar-type H(+)-ATPase C3 | chr4:18147330-18148853 FORWARD LENGTH=164;>AT4G34720.1 | Symbols: AVA-P1, VHA-C1, ATVHA-C1 | ATPase, F0/V0 complex, subunit C protein | chr4:16568223-16569165 REVERSE LENGTH=	6	1	1	1	1	1	1	1	1	1	1	1	1	1	1	1	11	11	11	16.571	164	164;164;164;165;166;200	6	9	7	7	6.3107e-13	11	11	11	11	27390000000	7404200000	8732200000	5589400000	5664600000	6179500000	7682200000	4736700000	5900200000	5	5	9	4
>AT1G19920.1 | Symbols: APS2, ASA1 | Pseudouridine synthase/archaeosine transglycosylase-like family protein | chr1:6914835-6916657 REVERSE LENGTH=476	>AT1G19920.1 | Symbols: APS2, ASA1 | Pseudouridine synthase/archaeosine transglycosylase-like family protein | chr1:6914835-6916657 REVERSE LENGTH=476	8	5	5	>AT1G19920.1 | Symbols: APS2, ASA1 | Pseudouridine synthase/archaeosine transglycosylase-like family protein | chr1:6914835-6916657 REVERSE LENGTH=476	1	8	5	5	6	6	6	7	3	3	3	4	3	3	3	4	16.8	12.2	12.2	53.638	476	476	4	5	4	5	3.9482e-36	12	12	11.8	14.9	526280000	151280000	139030000	96965000	139000000	144330000	128480000	149710000	160190000	2	1	1	4
>AT1G20010.1 | Symbols: TUB5 | tubulin beta-5 chain | chr1:6938033-6940481 REVERSE LENGTH=449	>AT1G20010.1 | Symbols: TUB5 | tubulin beta-5 chain | chr1:6938033-6940481 REVERSE LENGTH=449	17	7	5	>AT1G20010.1 | Symbols: TUB5 | tubulin beta-5 chain | chr1:6938033-6940481 REVERSE LENGTH=449	1	17	7	5	16	15	15	16	6	7	7	7	5	5	5	5	48.3	24.1	15.8	50.342	449	449	9	10	11	11	1.0884e-252	42.8	42.5	45.4	48.1	6734400000	1837700000	2025000000	1621900000	1249800000	1996300000	2246400000	1572700000	1502200000	10	11	12	8
>AT1G20050.1 | Symbols: HYD1 | C-8,7 sterol isomerase | chr1:6949160-6950135 FORWARD LENGTH=223	>AT1G20050.1 | Symbols: HYD1 | C-8,7 sterol isomerase | chr1:6949160-6950135 FORWARD LENGTH=223	3	3	3	>AT1G20050.1 | Symbols: HYD1 | C-8,7 sterol isomerase | chr1:6949160-6950135 FORWARD LENGTH=223	1	3	3	3	2	2	3	3	2	2	3	3	2	2	3	3	17	17	17	25.146	223	223	4	3	4	4	1.0488e-29	10.3	10.3	17	17	5064100000	2056700000	1385800000	838850000	782800000	1143400000	1020800000	627850000	671910000	5	3	4	4
>AT1G20110.1 | Symbols: | RING/FYVE/PHD zinc finger superfamily protein | chr1:6971554-6974578 FORWARD LENGTH=601	>AT1G20110.1 | Symbols: | RING/FYVE/PHD zinc finger superfamily protein | chr1:6971554-6974578 FORWARD LENGTH=601	2	2	2	>AT1G20110.1 | Symbols: | RING/FYVE/PHD zinc finger superfamily protein | chr1:6971554-6974578 FORWARD LENGTH=601	1	2	2	2	2	2	2	2	2	2	2	2	2	2	2	2	4.3	4.3	4.3	65.395	601	601	2	2	2	2	5.1228e-14	4.3	4.3	4.3	4.3	275380000	160270000	80088000	21419000	13603000	167260000	72510000	34693000	0	2	1	0	0
>AT1G20190.1 | Symbols: ATEXPA11, EXP11, ATEXP11, ATHEXP ALPHA 1.14, EXPA11 | expansin 11 | chr1:6998762-6999710 REVERSE LENGTH=252	>AT1G20190.1 | Symbols: ATEXPA11, EXP11, ATEXP11, ATHEXP ALPHA 1.14, EXPA11 | expansin 11 | chr1:6998762-6999710 REVERSE LENGTH=252	1	1	1	>AT1G20190.1 | Symbols: ATEXPA11, EXP11, ATEXP11, ATHEXP ALPHA 1.14, EXPA11 | expansin 11 | chr1:6998762-6999710 REVERSE LENGTH=252	1	1	1	1	1	1	1	0	1	1	1	0	1	1	1	0	4.4	4.4	4.4	26.761	252	252	1	1	1		0.00015483	4.4	4.4	4.4	0	75316000	25956000	29655000	19705000	0	0	0	21627000	0	1	0	0	0
>AT1G20200.1 | Symbols: EMB2719, HAP15 | PAM domain (PCI/PINT associated module) protein | chr1:7001409-7004154 REVERSE LENGTH=488	>AT1G20200.1 | Symbols: EMB2719, HAP15 | PAM domain (PCI/PINT associated module) protein | chr1:7001409-7004154 REVERSE LENGTH=488	18	18	9	>AT1G20200.1 | Symbols: EMB2719, HAP15 | PAM domain (PCI/PINT associated module) protein | chr1:7001409-7004154 REVERSE LENGTH=488	1	18	18	9	16	14	17	16	16	14	17	16	9	8	8	8	46.7	46.7	24.6	55.582	488	488	23	19	26	22	4.3453e-186	42.8	38.1	42.4	42.8	15427000000	3933100000	3594600000	4475000000	3424600000	3922200000	5040800000	4125700000	3802000000	13	13	20	18
>AT1G20220.1 | Symbols: | Alba DNA/RNA-binding protein | chr1:7005090-7007285 REVERSE LENGTH=315	>AT1G20220.1 | Symbols: | Alba DNA/RNA-binding protein | chr1:7005090-7007285 REVERSE LENGTH=315	4	4	4	>AT1G20220.1 | Symbols: | Alba DNA/RNA-binding protein | chr1:7005090-7007285 REVERSE LENGTH=315	1	4	4	4	3	2	4	4	3	2	4	4	3	2	4	4	18.7	18.7	18.7	33.763	315	315	3	2	4	5	1.214e-73	14.3	14	18.7	18.7	1166600000	364300000	221820000	280810000	299640000	328150000	442580000	249250000	280120000	4	3	5	4
>AT1G20225.1 | Symbols: | Thioredoxin superfamily protein | chr1:7007966-7009318 REVERSE LENGTH=233	>AT1G20225.1 | Symbols: | Thioredoxin superfamily protein | chr1:7007966-7009318 REVERSE LENGTH=233	2	2	2	>AT1G20225.1 | Symbols: | Thioredoxin superfamily protein | chr1:7007966-7009318 REVERSE LENGTH=233	1	2	2	2	2	2	2	2	2	2	2	2	2	2	2	2	10.3	10.3	10.3	26.052	233	233	2	2	2	2	1.7768e-11	10.3	10.3	10.3	10.3	659980000	175320000	167670000	159020000	157980000	168840000	208000000	173960000	187360000	1	1	1	1
>AT1G76030.1 | Symbols: | ATPase, V1 complex, subunit B protein | chr1:28534134-28536916 FORWARD LENGTH=486;>AT1G20260.1 | Symbols: | ATPase, V1 complex, subunit B protein | chr1:7016971-7020290 FORWARD LENGTH=487	>AT1G76030.1 | Symbols: | ATPase, V1 complex, subunit B protein | chr1:28534134-28536916 FORWARD LENGTH=486;>AT1G20260.1 | Symbols: | ATPase, V1 complex, subunit B protein | chr1:7016971-7020290 FORWARD LENGTH=487	27;27	27;27	5;5	>AT1G76030.1 | Symbols: | ATPase, V1 complex, subunit B protein | chr1:28534134-28536916 FORWARD LENGTH=486;>AT1G20260.1 | Symbols: | ATPase, V1 complex, subunit B protein | chr1:7016971-7020290 FORWARD LENGTH=487	2	27	27	5	24	24	27	27	24	24	27	27	5	5	5	5	70	70	11.3	54.107	486	486;487	54	51	63	57	0	61.3	59.9	70	70	78956000000	22166000000	19223000000	20640000000	16927000000	19038000000	19954000000	22118000000	21239000000	69	65	76	76
>AT1G20330.1 | Symbols: SMT2, CVP1, FRL1 | sterol methyltransferase 2 | chr1:7038968-7040053 REVERSE LENGTH=361	>AT1G20330.1 | Symbols: SMT2, CVP1, FRL1 | sterol methyltransferase 2 | chr1:7038968-7040053 REVERSE LENGTH=361	8	8	8	>AT1G20330.1 | Symbols: SMT2, CVP1, FRL1 | sterol methyltransferase 2 | chr1:7038968-7040053 REVERSE LENGTH=361	1	8	8	8	5	6	6	7	5	6	6	7	5	6	6	7	28.3	28.3	28.3	40.45	361	361	5	7	7	8	2.921e-62	16.6	20.8	21.6	25.5	2423300000	663520000	427700000	761640000	570470000	546690000	505200000	824330000	588460000	4	5	6	5
>AT1G20370.1 | Symbols: | Pseudouridine synthase family protein | chr1:7051846-7053588 REVERSE LENGTH=549	>AT1G20370.1 | Symbols: | Pseudouridine synthase family protein | chr1:7051846-7053588 REVERSE LENGTH=549	2	2	2	>AT1G20370.1 | Symbols: | Pseudouridine synthase family protein | chr1:7051846-7053588 REVERSE LENGTH=549	1	2	2	2	1	1	1	0	1	1	1	0	1	1	1	0	5.8	5.8	5.8	61.549	549	549	1	1	1		1.2637e-08	2	3.8	3.8	0	65783000	36492000	11127000	18164000	0	0	0	19935000	0	1	1	1	0
>AT1G20430.1 | Symbols: | unknown protein; Has 29 Blast hits to 29 proteins in 10 species: Archae - 0; Bacteria - 0; Metazoa - 0; Fungi - 0; Plants - 29; Viruses - 0; Other Eukaryotes - 0 (source: NCBI BLink). | chr1:7083471-7083821 REVERSE LENGTH=116	>AT1G20430.1 | Symbols: | unknown protein; Has 29 Blast hits to 29 proteins in 10 species: Archae - 0; Bacteria - 0; Metazoa - 0; Fungi - 0; Plants - 29; Viruses - 0; Other Eukaryotes - 0 (source: NCBI BLink). | chr1:7083471-7083821 REVERSE LENGTH=116	2	2	2	>AT1G20430.1 | Symbols: | unknown protein; Has 29 Blast hits to 29 proteins in 10 species: Archae - 0; Bacteria - 0; Metazoa - 0; Fungi - 0; Plants - 29; Viruses - 0; Other Eukaryotes - 0 (source: NCBI BLink). | chr1:7083471-7083821 REVERSE LENGTH=116	1	2	2	2	2	2	2	2	2	2	2	2	2	2	2	2	25.9	25.9	25.9	12.769	116	116	2	2	2	2	5.3209e-20	25.9	25.9	25.9	25.9	363330000	102670000	95125000	75475000	90058000	104540000	109950000	85238000	106620000	2	2	1	1
>AT1G20440.1 | Symbols: COR47, RD17, AtCOR47 | cold-regulated 47 | chr1:7084722-7085664 REVERSE LENGTH=265	>AT1G20440.1 | Symbols: COR47, RD17, AtCOR47 | cold-regulated 47 | chr1:7084722-7085664 REVERSE LENGTH=265	4	4	4	>AT1G20440.1 | Symbols: COR47, RD17, AtCOR47 | cold-regulated 47 | chr1:7084722-7085664 REVERSE LENGTH=265	1	4	4	4	3	4	4	4	3	4	4	4	3	4	4	4	27.9	27.9	27.9	29.896	265	265	3	4	4	4	1.5461e-15	16.2	27.9	27.9	27.9	723340000	150450000	220060000	183700000	169130000	0	274100000	191250000	197920000	0	1	2	1
>AT1G20450.2 | Symbols: LTI29, LTI45, ERD10 | Dehydrin family protein | chr1:7088235-7089107 REVERSE LENGTH=259;>AT1G20450.1 | Symbols: LTI29, LTI45, ERD10 | Dehydrin family protein | chr1:7088235-7089107 REVERSE LENGTH=260	>AT1G20450.2 | Symbols: LTI29, LTI45, ERD10 | Dehydrin family protein | chr1:7088235-7089107 REVERSE LENGTH=259;>AT1G20450.1 | Symbols: LTI29, LTI45, ERD10 | Dehydrin family protein | chr1:7088235-7089107 REVERSE LENGTH=260	3;3	3;3	3;3	>AT1G20450.2 | Symbols: LTI29, LTI45, ERD10 | Dehydrin family protein | chr1:7088235-7089107 REVERSE LENGTH=259;>AT1G20450.1 | Symbols: LTI29, LTI45, ERD10 | Dehydrin family protein | chr1:7088235-7089107 REVERSE LENGTH=260	2	3	3	3	2	3	2	2	2	3	2	2	2	3	2	2	19.7	19.7	19.7	29.443	259	259;260	2	3	2	2	1.8251e-21	9.3	19.7	9.3	9.3	301090000	106910000	118150000	38314000	37718000	124700000	89478000	56694000	59259000	2	2	0	0
>AT1G20480.1 | Symbols: | AMP-dependent synthetase and ligase family protein | chr1:7094978-7097073 REVERSE LENGTH=565	>AT1G20480.1 | Symbols: | AMP-dependent synthetase and ligase family protein | chr1:7094978-7097073 REVERSE LENGTH=565	1	1	1	>AT1G20480.1 | Symbols: | AMP-dependent synthetase and ligase family protein | chr1:7094978-7097073 REVERSE LENGTH=565	1	1	1	1	1	0	0	0	1	0	0	0	1	0	0	0	2.3	2.3	2.3	61.437	565	565	1				4.0098e-05	2.3	0	0	0	32430000	32430000	0	0	0	32430000	0	0	0	1	0	0	0
>AT1G20510.2 | Symbols: OPCL1 | OPC-8:0 CoA ligase1 | chr1:7103939-7105856 REVERSE LENGTH=473;>AT1G20510.1 | Symbols: OPCL1 | OPC-8:0 CoA ligase1 | chr1:7103645-7105856 REVERSE LENGTH=546	>AT1G20510.2 | Symbols: OPCL1 | OPC-8:0 CoA ligase1 | chr1:7103939-7105856 REVERSE LENGTH=473;>AT1G20510.1 | Symbols: OPCL1 | OPC-8:0 CoA ligase1 | chr1:7103645-7105856 REVERSE LENGTH=546	6;6	6;6	6;6	>AT1G20510.2 | Symbols: OPCL1 | OPC-8:0 CoA ligase1 | chr1:7103939-7105856 REVERSE LENGTH=473;>AT1G20510.1 | Symbols: OPCL1 | OPC-8:0 CoA ligase1 | chr1:7103645-7105856 REVERSE LENGTH=546	2	6	6	6	4	4	5	5	4	4	5	5	4	4	5	5	21.8	21.8	21.8	51.222	473	473;546	4	4	5	5	1.0512e-28	16.1	16.1	16.9	16.9	746720000	328340000	153780000	162850000	101750000	314760000	211300000	154760000	128210000	4	3	1	3
>AT1G20560.1 | Symbols: AAE1 | acyl activating enzyme 1 | chr1:7119927-7121730 REVERSE LENGTH=556;>AT1G20560.2 | Symbols: AAE1 | acyl activating enzyme 1 | chr1:7119927-7121363 REVERSE LENGTH=478	>AT1G20560.1 | Symbols: AAE1 | acyl activating enzyme 1 | chr1:7119927-7121730 REVERSE LENGTH=556;>AT1G20560.2 | Symbols: AAE1 | acyl activating enzyme 1 | chr1:7119927-7121363 REVERSE LENGTH=478	5;4	5;4	5;4	>AT1G20560.1 | Symbols: AAE1 | acyl activating enzyme 1 | chr1:7119927-7121730 REVERSE LENGTH=556;>AT1G20560.2 | Symbols: AAE1 | acyl activating enzyme 1 | chr1:7119927-7121363 REVERSE LENGTH=478	2	5	5	5	3	5	5	4	3	5	5	4	3	5	5	4	10.8	10.8	10.8	61.073	556	556;478	3	5	5	4	3.8836e-38	6.5	10.8	10.8	10.8	455900000	102980000	111230000	138290000	103410000	104020000	93414000	172370000	140810000	2	2	5	2
>AT1G20575.1 | Symbols: | Nucleotide-diphospho-sugar transferases superfamily protein | chr1:7126987-7128677 REVERSE LENGTH=246	>AT1G20575.1 | Symbols: | Nucleotide-diphospho-sugar transferases superfamily protein | chr1:7126987-7128677 REVERSE LENGTH=246	4	4	4	>AT1G20575.1 | Symbols: | Nucleotide-diphospho-sugar transferases superfamily protein | chr1:7126987-7128677 REVERSE LENGTH=246	1	4	4	4	4	3	2	1	4	3	2	1	4	3	2	1	23.2	23.2	23.2	27.676	246	246	4	4	2	1	6.1099e-25	23.2	18.7	13.4	4.5	555730000	206040000	146210000	107310000	96163000	191650000	183050000	114690000	0	3	4	0	0
>AT1G20580.1 | Symbols: | Small nuclear ribonucleoprotein family protein | chr1:7128979-7130371 FORWARD LENGTH=131;>AT1G76300.1 | Symbols: SmD3 | snRNP core protein SMD3 | chr1:28625957-28627080 FORWARD LENGTH=128;>AT1G20600.1 | Symbols: | AP2/B3-like transcriptional factor family protein | chr1:7133111-7134237 FORWARD LENGTH=237	>AT1G20580.1 | Symbols: | Small nuclear ribonucleoprotein family protein | chr1:7128979-7130371 FORWARD LENGTH=131;>AT1G76300.1 | Symbols: SmD3 | snRNP core protein SMD3 | chr1:28625957-28627080 FORWARD LENGTH=128;>AT1G20600.1 | Symbols: | AP2/B3-like transcriptional factor family protein | chr1:7133111-7134237 FORWARD LENGTH=237	2;1;1	2;1;1	2;1;1	>AT1G20580.1 | Symbols: | Small nuclear ribonucleoprotein family protein | chr1:7128979-7130371 FORWARD LENGTH=131;>AT1G76300.1 | Symbols: SmD3 | snRNP core protein SMD3 | chr1:28625957-28627080 FORWARD LENGTH=128;>AT1G20600.1 | Symbols: | AP2/B3-like tr	3	2	2	2	2	2	2	2	2	2	2	2	2	2	2	2	14.5	14.5	14.5	14.237	131	131;128;237	2	2	3	3	2.0766e-06	14.5	14.5	14.5	14.5	1375300000	263850000	189140000	453640000	468620000	363920000	327720000	436990000	435990000	1	1	2	2
>AT1G20620.5 | Symbols: CAT3, SEN2, ATCAT3 | catalase 3 | chr1:7143142-7146193 FORWARD LENGTH=485;>AT1G20620.1 | Symbols: CAT3, SEN2, ATCAT3 | catalase 3 | chr1:7143142-7146193 FORWARD LENGTH=492;>AT1G20620.2 | Symbols: CAT3, SEN2, ATCAT3 | catalase 3 | chr1:7143142-7145807 FORWARD LENGTH=427;>AT1G20620.4 | Symbols: CAT3, SEN2, ATCAT3 | catalase 3 | chr1:7144692-7146193 FORWARD LENGTH=377	>AT1G20620.5 | Symbols: CAT3, SEN2, ATCAT3 | catalase 3 | chr1:7143142-7146193 FORWARD LENGTH=485;>AT1G20620.1 | Symbols: CAT3, SEN2, ATCAT3 | catalase 3 | chr1:7143142-7146193 FORWARD LENGTH=492;>AT1G20620.2 | Symbols: CAT3, SEN2, ATCAT3 | catalase 3 | chr1:7143142-7145807 FORWARD LENGTH=427;>AT1G20620.4 | Symbols: CAT3, SEN2, ATCAT3 | catalase 3 | chr1:7144692-7146193 FORWARD LENGTH=377	16;16;15;13	16;16;15;13	12;12;11;11	>AT1G20620.5 | Symbols: CAT3, SEN2, ATCAT3 | catalase 3 | chr1:7143142-7146193 FORWARD LENGTH=485;>AT1G20620.1 | Symbols: CAT3, SEN2, ATCAT3 | catalase 3 | chr1:7143142-7146193 FORWARD LENGTH=492;>AT1G20620.2 | Symbols: CAT3, SEN2, ATCAT3 | catalase 3 | ch	4	16	16	12	14	14	15	16	14	14	15	16	11	11	11	12	48.5	48.5	36.5	55.967	485	485;492;427;377	24	19	24	20	2.1596e-211	41.4	41.4	46.4	48.5	35221000000	11500000000	9011400000	8079300000	6630900000	11104000000	9300700000	7366600000	8566800000	28	24	27	25
>AT1G20630.1 | Symbols: CAT1 | catalase 1 | chr1:7146812-7149609 FORWARD LENGTH=492	>AT1G20630.1 | Symbols: CAT1 | catalase 1 | chr1:7146812-7149609 FORWARD LENGTH=492	8	3	3	>AT1G20630.1 | Symbols: CAT1 | catalase 1 | chr1:7146812-7149609 FORWARD LENGTH=492	1	8	3	3	6	6	8	5	1	1	3	2	1	1	3	2	18.9	7.9	7.9	56.761	492	492	1	1	3	2	1.0022e-61	13.2	13.2	18.9	13.4	311850000	55121000	67685000	149350000	39694000	0	0	110040000	103750000	0	0	3	1
>AT1G20780.1 | Symbols: PUB44, ATPUB44, SAUL1 | senescence-associated E3 ubiquitin ligase 1 | chr1:7217812-7220609 FORWARD LENGTH=801	>AT1G20780.1 | Symbols: PUB44, ATPUB44, SAUL1 | senescence-associated E3 ubiquitin ligase 1 | chr1:7217812-7220609 FORWARD LENGTH=801	4	4	4	>AT1G20780.1 | Symbols: PUB44, ATPUB44, SAUL1 | senescence-associated E3 ubiquitin ligase 1 | chr1:7217812-7220609 FORWARD LENGTH=801	1	4	4	4	3	2	2	3	3	2	2	3	3	2	2	3	7.4	7.4	7.4	88.379	801	801	4	2	2	3	2.3827e-20	6	4.1	4.1	5.2	204830000	92614000	30468000	32727000	49023000	67602000	47834000	51038000	58144000	4	1	2	2
>AT1G20840.1 | Symbols: TMT1 | tonoplast monosaccharide transporter1 | chr1:7245107-7247674 REVERSE LENGTH=734	>AT1G20840.1 | Symbols: TMT1 | tonoplast monosaccharide transporter1 | chr1:7245107-7247674 REVERSE LENGTH=734	9	9	9	>AT1G20840.1 | Symbols: TMT1 | tonoplast monosaccharide transporter1 | chr1:7245107-7247674 REVERSE LENGTH=734	1	9	9	9	5	7	7	8	5	7	7	8	5	7	7	8	18	18	18	79.484	734	734	7	9	9	10	3.633e-127	10.1	12.5	15.4	16.5	3210100000	909620000	945590000	627270000	727580000	864370000	951700000	871040000	895730000	6	8	5	7
>AT1G20950.1 | Symbols: | Phosphofructokinase family protein | chr1:7297467-7301336 REVERSE LENGTH=614	>AT1G20950.1 | Symbols: | Phosphofructokinase family protein | chr1:7297467-7301336 REVERSE LENGTH=614	24	24	13	>AT1G20950.1 | Symbols: | Phosphofructokinase family protein | chr1:7297467-7301336 REVERSE LENGTH=614	1	24	24	13	20	20	21	23	20	20	21	23	11	12	12	12	44.3	44.3	28.8	67.118	614	614	25	27	26	30	4.3845e-203	38.8	37.9	40.9	42.5	20277000000	6044000000	5757100000	4392200000	4083500000	5958100000	5848800000	4866500000	5495100000	22	18	23	26
>AT1G20960.2 | Symbols: emb1507 | U5 small nuclear ribonucleoprotein helicase, putative | chr1:7302591-7309914 REVERSE LENGTH=2171;>AT1G20960.1 | Symbols: emb1507 | U5 small nuclear ribonucleoprotein helicase, putative | chr1:7302591-7309914 REVERSE LENGTH=2171;>AT2G42270.1 | Symbols: | U5 small nuclear ribonucleoprotein helicase | chr2:17604330-17610848 FORWARD LENGTH=2172	>AT1G20960.2 | Symbols: emb1507 | U5 small nuclear ribonucleoprotein helicase, putative | chr1:7302591-7309914 REVERSE LENGTH=2171;>AT1G20960.1 | Symbols: emb1507 | U5 small nuclear ribonucleoprotein helicase, putative | chr1:7302591-7309914 REVERSE LENGTH=2171	32;32;8	32;32;8	31;31;7	>AT1G20960.2 | Symbols: emb1507 | U5 small nuclear ribonucleoprotein helicase, putative | chr1:7302591-7309914 REVERSE LENGTH=2171;>AT1G20960.1 | Symbols: emb1507 | U5 small nuclear ribonucleoprotein helicase, putative | chr1:7302591-7309914 REVERSE LENGTH	3	32	32	31	22	24	21	26	22	24	21	26	22	24	20	26	19.3	19.3	19	247.1	2171	2171;2171;2172	28	29	27	28	5.0303e-211	12.7	14	13.2	16.3	5848300000	2033400000	1588600000	1062600000	1163700000	1959700000	1756000000	1211100000	1312600000	23	20	18	17
>AT1G21065.1 | Symbols: | unknown protein; INVOLVED IN: biological_process unknown; LOCATED IN: chloroplast; EXPRESSED IN: 22 plant structures; EXPRESSED DURING: 13 growth stages; CONTAINS InterPro DOMAIN/s: Uncharacterised protein family UPF0047 (InterPro:IPR001602); Has 3800 Blast hits to 3784 proteins in 1137 species: Archae - 215; Bacteria - 2154; Metazoa - 42; Fungi - 99; Plants - 99; Viruse…	>AT1G21065.1 | Symbols: | unknown protein; INVOLVED IN: biological_process unknown; LOCATED IN: chloroplast; EXPRESSED IN: 22 plant structures; EXPRESSED DURING: 13 growth stages; CONTAINS InterPro DOMAIN/s: Uncharacterised protein family UPF0047 (InterPro:IPR001602); Has 3800 Blast hits to 3784 proteins in 1137 species: Archae - 215; Bacteria - 2154; Metazoa - 42; Fungi - 99; Plants - 99; Viruse…	3	3	3	>AT1G21065.1 | Symbols: | unknown protein; INVOLVED IN: biological_process unknown; LOCATED IN: chloroplast; EXPRESSED IN: 22 plant structures; EXPRESSED DURING: 13 growth stages; CONTAINS InterPro DOMAIN/s: Uncharacterised protein family UPF0047 (InterPr	1	3	3	3	3	2	2	2	3	2	2	2	3	2	2	2	15.2	15.2	15.2	23.707	217	217	4	2	3	3	3.5752e-12	15.2	8.8	8.8	8.8	528470000	117870000	141110000	149460000	120030000	79793000	195550000	90614000	88918000	0	2	1	1
>AT5G42420.2 | Symbols: | Nucleotide-sugar transporter family protein | chr5:16968819-16970225 FORWARD LENGTH=283;>AT1G21070.1 | Symbols: | Nucleotide-sugar transporter family protein | chr1:7376148-7377810 REVERSE LENGTH=348;>AT5G42420.1 | Symbols: | Nucleotide-sugar transporter family protein | chr5:16968819-16970225 FORWARD LENGTH=350	>AT5G42420.2 | Symbols: | Nucleotide-sugar transporter family protein | chr5:16968819-16970225 FORWARD LENGTH=283;>AT1G21070.1 | Symbols: | Nucleotide-sugar transporter family protein | chr1:7376148-7377810 REVERSE LENGTH=348;>AT5G42420.1 | Symbols: | Nucleotide-sugar transporter family protein | chr5:16968819-16970225 FORWARD LENGTH=350	1;1;1	1;1;1	1;1;1	>AT5G42420.2 | Symbols: | Nucleotide-sugar transporter family protein | chr5:16968819-16970225 FORWARD LENGTH=283;>AT1G21070.1 | Symbols: | Nucleotide-sugar transporter family protein | chr1:7376148-7377810 REVERSE LENGTH=348;>AT5G42420.1 | Symbols: | N	3	1	1	1	0	1	0	1	0	1	0	1	0	1	0	1	3.9	3.9	3.9	30.792	283	283;348;350		1		1	0.005553	0	3.9	0	3.9	49770000	0	27356000	0	22413000	0	0	0	28157000	0	0	0	1
>AT1G21080.2 | Symbols: | DNAJ heat shock N-terminal domain-containing protein | chr1:7378822-7380927 REVERSE LENGTH=304;>AT1G21080.1 | Symbols: | DNAJ heat shock N-terminal domain-containing protein | chr1:7378822-7382275 REVERSE LENGTH=391;>AT1G21080.3 | Symbols: | DNAJ heat shock N-terminal domain-containing protein | chr1:7378822-7382275 REVERSE LENGTH=400	>AT1G21080.2 | Symbols: | DNAJ heat shock N-terminal domain-containing protein | chr1:7378822-7380927 REVERSE LENGTH=304;>AT1G21080.1 | Symbols: | DNAJ heat shock N-terminal domain-containing protein | chr1:7378822-7382275 REVERSE LENGTH=391;>AT1G21080.3 | Symbols: | DNAJ heat shock N-terminal domain-containing protein | chr1:7378822-7382275 REVERSE LENGTH=400	2;2;2	2;2;2	2;2;2	>AT1G21080.2 | Symbols: | DNAJ heat shock N-terminal domain-containing protein | chr1:7378822-7380927 REVERSE LENGTH=304;>AT1G21080.1 | Symbols: | DNAJ heat shock N-terminal domain-containing protein | chr1:7378822-7382275 REVERSE LENGTH=391;>AT1G21080.3	3	2	2	2	0	0	1	1	0	0	1	1	0	0	1	1	7.9	7.9	7.9	34.399	304	304;391;400			1	1	1.2835e-05	0	0	3.9	3.9	137320000	0	0	37040000	100280000	0	0	0	125980000	0	0	1	1
>AT1G21100.1 | Symbols: | O-methyltransferase family protein | chr1:7386991-7388318 REVERSE LENGTH=373;>AT1G21130.1 | Symbols: | O-methyltransferase family protein | chr1:7399170-7400470 REVERSE LENGTH=373;>AT1G21130.2 | Symbols: | O-methyltransferase family protein | chr1:7399489-7400470 REVERSE LENGTH=296	>AT1G21100.1 | Symbols: | O-methyltransferase family protein | chr1:7386991-7388318 REVERSE LENGTH=373;>AT1G21130.1 | Symbols: | O-methyltransferase family protein | chr1:7399170-7400470 REVERSE LENGTH=373	10;6;4	9;6;4	4;2;1	>AT1G21100.1 | Symbols: | O-methyltransferase family protein | chr1:7386991-7388318 REVERSE LENGTH=373;>AT1G21130.1 | Symbols: | O-methyltransferase family protein | chr1:7399170-7400470 REVERSE LENGTH=373	3	10	9	4	8	9	8	8	7	8	7	7	3	4	3	4	32.2	29.8	12.9	40.869	373	373;373;296	9	11	10	9	4.3832e-75	24.7	29	24.9	24.4	6072900000	1918400000	1868900000	1364300000	921280000	1557800000	1617700000	1529800000	1713400000	8	10	8	10
>AT1G21120.1 | Symbols: | O-methyltransferase family protein | chr1:7395331-7396640 REVERSE LENGTH=373;>AT1G21110.1 | Symbols: | O-methyltransferase family protein | chr1:7390110-7391419 REVERSE LENGTH=373	>AT1G21120.1 | Symbols: | O-methyltransferase family protein | chr1:7395331-7396640 REVERSE LENGTH=373;>AT1G21110.1 | Symbols: | O-methyltransferase family protein | chr1:7390110-7391419 REVERSE LENGTH=373	9;9	3;3	3;3	>AT1G21120.1 | Symbols: | O-methyltransferase family protein | chr1:7395331-7396640 REVERSE LENGTH=373;>AT1G21110.1 | Symbols: | O-methyltransferase family protein | chr1:7390110-7391419 REVERSE LENGTH=373	2	9	3	3	7	8	7	6	2	3	2	2	2	3	2	2	29	9.7	9.7	40.912	373	373;373	2	3	2	2	3.6472e-69	22.3	25.7	20.9	17.7	683420000	188620000	269940000	121310000	103550000	198840000	289680000	139090000	129900000	2	3	2	2
>AT1G21190.1 | Symbols: | Small nuclear ribonucleoprotein family protein | chr1:7419989-7420856 REVERSE LENGTH=97;>AT1G76860.1 | Symbols: | Small nuclear ribonucleoprotein family protein | chr1:28854594-28855637 REVERSE LENGTH=98	>AT1G21190.1 | Symbols: | Small nuclear ribonucleoprotein family protein | chr1:7419989-7420856 REVERSE LENGTH=97;>AT1G76860.1 | Symbols: | Small nuclear ribonucleoprotein family protein | chr1:28854594-28855637 REVERSE LENGTH=98	2;2	2;2	2;2	>AT1G21190.1 | Symbols: | Small nuclear ribonucleoprotein family protein | chr1:7419989-7420856 REVERSE LENGTH=97;>AT1G76860.1 | Symbols: | Small nuclear ribonucleoprotein family protein | chr1:28854594-28855637 REVERSE LENGTH=98	2	2	2	2	2	2	2	2	2	2	2	2	2	2	2	2	19.6	19.6	19.6	11.253	97	97;98	2	3	2	2	7.8674e-08	19.6	19.6	19.6	19.6	353830000	101890000	108360000	83643000	59936000	99791000	116950000	92026000	75427000	2	2	2	3
>AT1G21380.1 | Symbols: | Target of Myb protein 1 | chr1:7485806-7488032 REVERSE LENGTH=506	>AT1G21380.1 | Symbols: | Target of Myb protein 1 | chr1:7485806-7488032 REVERSE LENGTH=506	1	1	1	>AT1G21380.1 | Symbols: | Target of Myb protein 1 | chr1:7485806-7488032 REVERSE LENGTH=506	1	1	1	1	1	0	0	0	1	0	0	0	1	0	0	0	2.4	2.4	2.4	55.791	506	506	1				0.0017886	2.4	0	0	0	23583000	23583000	0	0	0	23583000	0	0	0	1	0	0	0
>AT1G21440.1 | Symbols: | Phosphoenolpyruvate carboxylase family protein | chr1:7502325-7504103 REVERSE LENGTH=336	>AT1G21440.1 | Symbols: | Phosphoenolpyruvate carboxylase family protein | chr1:7502325-7504103 REVERSE LENGTH=336	4	4	4	>AT1G21440.1 | Symbols: | Phosphoenolpyruvate carboxylase family protein | chr1:7502325-7504103 REVERSE LENGTH=336	1	4	4	4	4	4	3	3	4	4	3	3	4	4	3	3	16.1	16.1	16.1	36.306	336	336	4	4	3	3	2.7659e-48	16.1	16.1	13.4	12.2	1088800000	334920000	320960000	261170000	171700000	266020000	381120000	274260000	279310000	4	2	5	2
>AT1G21660.1 | Symbols: | Chaperone DnaJ-domain superfamily protein | chr1:7605924-7608835 FORWARD LENGTH=523	>AT1G21660.1 | Symbols: | Chaperone DnaJ-domain superfamily protein | chr1:7605924-7608835 FORWARD LENGTH=523	1	1	1	>AT1G21660.1 | Symbols: | Chaperone DnaJ-domain superfamily protein | chr1:7605924-7608835 FORWARD LENGTH=523	1	1	1	1	0	0	1	0	0	0	1	0	0	0	1	0	4.4	4.4	4.4	56.91	523	523			1		2.4621e-11	0	0	4.4	0	36986000	0	0	36986000	0	0	0	40593000	0	0	0	1	0
>AT1G21680.1 | Symbols: | DPP6 N-terminal domain-like protein | chr1:7613028-7615148 FORWARD LENGTH=706	>AT1G21680.1 | Symbols: | DPP6 N-terminal domain-like protein | chr1:7613028-7615148 FORWARD LENGTH=706	3	3	3	>AT1G21680.1 | Symbols: | DPP6 N-terminal domain-like protein | chr1:7613028-7615148 FORWARD LENGTH=706	1	3	3	3	3	2	1	2	3	2	1	2	3	2	1	2	5.7	5.7	5.7	78.441	706	706	3	2	1	2	1.6031e-11	5.7	4	2.5	4	245770000	136410000	64107000	12634000	32614000	110990000	78991000	0	59993000	3	1	1	1
>AT1G21690.2 | Symbols: EMB1968, RFC4 | ATPase family associated with various cellular activities (AAA) | chr1:7615675-7618362 FORWARD LENGTH=327;>AT1G21690.1 | Symbols: EMB1968, RFC4 | ATPase family associated with various cellular activities (AAA) | chr1:7615675-7618362 FORWARD LENGTH=339;>AT1G21690.3 | Symbols: EMB1968 | ATPase family associated with various cellular activities (AAA) | chr1:76…	>AT1G21690.2 | Symbols: EMB1968, RFC4 | ATPase family associated with various cellular activities (AAA) | chr1:7615675-7618362 FORWARD LENGTH=327;>AT1G21690.1 | Symbols: EMB1968, RFC4 | ATPase family associated with various cellular activities (AAA) | chr1:7615675-7618362 FORWARD LENGTH=339;>AT1G21690.3 | Symbols: EMB1968 | ATPase family associated with various cellular activities (AAA) | chr1:76…	5;5;5;3	5;5;5;3	5;5;5;3	>AT1G21690.2 | Symbols: EMB1968, RFC4 | ATPase family associated with various cellular activities (AAA) | chr1:7615675-7618362 FORWARD LENGTH=327;>AT1G21690.1 | Symbols: EMB1968, RFC4 | ATPase family associated with various cellular activities (AAA) | ch	4	5	5	5	2	3	5	3	2	3	5	3	2	3	5	3	21.1	21.1	21.1	36.195	327	327;339;341;332	2	5	6	4	2.3118e-16	8.9	11.9	21.1	12.2	621270000	87154000	207420000	188180000	138510000	169550000	209810000	147930000	136160000	0	3	4	2
>AT1G21720.1 | Symbols: PBC1 | proteasome beta subunit C1 | chr1:7626394-7628070 FORWARD LENGTH=204;>AT1G77440.2 | Symbols: PBC2 | 20S proteasome beta subunit C2 | chr1:29096020-29098105 FORWARD LENGTH=204;>AT1G77440.1 | Symbols: PBC2 | 20S proteasome beta subunit C2 | chr1:29096334-29098105 FORWARD LENGTH=204	>AT1G21720.1 | Symbols: PBC1 | proteasome beta subunit C1 | chr1:7626394-7628070 FORWARD LENGTH=204;>AT1G77440.2 | Symbols: PBC2 | 20S proteasome beta subunit C2 | chr1:29096020-29098105 FORWARD LENGTH=204;>AT1G77440.1 | Symbols: PBC2 | 20S proteasome beta subunit C2 | chr1:29096334-29098105 FORWARD LENGTH=204	5;3;3	5;3;3	5;3;3	>AT1G21720.1 | Symbols: PBC1 | proteasome beta subunit C1 | chr1:7626394-7628070 FORWARD LENGTH=204;>AT1G77440.2 | Symbols: PBC2 | 20S proteasome beta subunit C2 | chr1:29096020-29098105 FORWARD LENGTH=204;>AT1G77440.1 | Symbols: PBC2 | 20S proteasome beta	3	5	5	5	4	4	4	5	4	4	4	5	4	4	4	5	38.2	38.2	38.2	22.798	204	204;204;204	6	7	8	8	2.0507e-47	28.9	28.9	28.9	38.2	3570900000	472590000	763980000	1201800000	1132500000	363750000	398270000	1516400000	1504300000	4	3	8	10
>AT1G21750.1 | Symbols: ATPDIL1-1, ATPDI5, PDI5, PDIL1-1 | PDI-like 1-1 | chr1:7645767-7648514 FORWARD LENGTH=501;>AT1G21750.2 | Symbols: ATPDIL1-1, PDIL1-1 | PDI-like 1-1 | chr1:7645767-7648695 FORWARD LENGTH=487	>AT1G21750.1 | Symbols: ATPDIL1-1, ATPDI5, PDI5, PDIL1-1 | PDI-like 1-1 | chr1:7645767-7648514 FORWARD LENGTH=501;>AT1G21750.2 | Symbols: ATPDIL1-1, PDIL1-1 | PDI-like 1-1 | chr1:7645767-7648695 FORWARD LENGTH=487	25;23	25;23	21;19	>AT1G21750.1 | Symbols: ATPDIL1-1, ATPDI5, PDI5, PDIL1-1 | PDI-like 1-1 | chr1:7645767-7648514 FORWARD LENGTH=501;>AT1G21750.2 | Symbols: ATPDIL1-1, PDIL1-1 | PDI-like 1-1 | chr1:7645767-7648695 FORWARD LENGTH=487	2	25	25	21	16	21	21	17	16	21	21	17	14	18	17	14	50.7	50.7	43.3	55.601	501	501;487	18	23	22	19	1.2199e-117	38.5	44.5	43.3	36.5	11062000000	3227800000	3364200000	2550800000	1919400000	3144700000	3758100000	2354300000	2322900000	14	21	18	12
>AT1G21850.1 | Symbols: sks8 | SKU5 similar 8 | chr1:7667803-7670530 REVERSE LENGTH=551	>AT1G21850.1 | Symbols: sks8 | SKU5 similar 8 | chr1:7667803-7670530 REVERSE LENGTH=551	1	1	1	>AT1G21850.1 | Symbols: sks8 | SKU5 similar 8 | chr1:7667803-7670530 REVERSE LENGTH=551	1	1	1	1	0	1	0	0	0	1	0	0	0	1	0	0	3.8	3.8	3.8	61.375	551	551		1			0.0022245	0	3.8	0	0	24855000	0	24855000	0	0	0	28145000	0	0	0	1	0	0
>AT1G21880.1 | Symbols: LYM1 | lysm domain GPI-anchored protein 1 precursor | chr1:7680689-7682048 FORWARD LENGTH=316;>AT1G21880.2 | Symbols: LYM1 | lysm domain GPI-anchored protein 1 precursor | chr1:7680689-7682526 FORWARD LENGTH=416	>AT1G21880.1 | Symbols: LYM1 | lysm domain GPI-anchored protein 1 precursor | chr1:7680689-7682048 FORWARD LENGTH=316;>AT1G21880.2 | Symbols: LYM1 | lysm domain GPI-anchored protein 1 precursor | chr1:7680689-7682526 FORWARD LENGTH=416	1;1	1;1	1;1	>AT1G21880.1 | Symbols: LYM1 | lysm domain GPI-anchored protein 1 precursor | chr1:7680689-7682048 FORWARD LENGTH=316;>AT1G21880.2 | Symbols: LYM1 | lysm domain GPI-anchored protein 1 precursor | chr1:7680689-7682526 FORWARD LENGTH=416	2	1	1	1	1	1	1	1	1	1	1	1	1	1	1	1	3.2	3.2	3.2	33.401	316	316;416	1	1	2	1	0.001774	3.2	3.2	3.2	3.2	254920000	66682000	77506000	65608000	45126000	0	0	0	56689000	2	1	1	1
>AT1G22170.1 | Symbols: | Phosphoglycerate mutase family protein | chr1:7826603-7828055 FORWARD LENGTH=334	>AT1G22170.1 | Symbols: | Phosphoglycerate mutase family protein | chr1:7826603-7828055 FORWARD LENGTH=334	4	4	3	>AT1G22170.1 | Symbols: | Phosphoglycerate mutase family protein | chr1:7826603-7828055 FORWARD LENGTH=334	1	4	4	3	4	4	1	2	4	4	1	2	3	3	0	2	14.1	14.1	11.4	37.294	334	334	4	4	1	2	3.5526e-11	14.1	14.1	2.7	7.8	278860000	132480000	101600000	23001000	21772000	108790000	138740000	0	0	1	3	1	0
>AT1G22200.2 | Symbols: | Endoplasmic reticulum vesicle transporter protein | chr1:7838104-7840602 REVERSE LENGTH=338;>AT1G22200.1 | Symbols: | Endoplasmic reticulum vesicle transporter protein | chr1:7837857-7840602 REVERSE LENGTH=386	>AT1G22200.2 | Symbols: | Endoplasmic reticulum vesicle transporter protein | chr1:7838104-7840602 REVERSE LENGTH=338;>AT1G22200.1 | Symbols: | Endoplasmic reticulum vesicle transporter protein | chr1:7837857-7840602 REVERSE LENGTH=386	3;3	3;3	3;3	>AT1G22200.2 | Symbols: | Endoplasmic reticulum vesicle transporter protein | chr1:7838104-7840602 REVERSE LENGTH=338;>AT1G22200.1 | Symbols: | Endoplasmic reticulum vesicle transporter protein | chr1:7837857-7840602 REVERSE LENGTH=386	2	3	3	3	0	0	1	2	0	0	1	2	0	0	1	2	13.3	13.3	13.3	38.334	338	338;386			1	2	4.715e-08	0	0	3.6	9.8	40442000	0	0	28031000	12411000	0	0	0	15591000	0	0	1	1
>AT1G22270.1 | Symbols: | Trm112p-like protein | chr1:7865548-7865922 FORWARD LENGTH=124	>AT1G22270.1 | Symbols: | Trm112p-like protein | chr1:7865548-7865922 FORWARD LENGTH=124	2	2	2	>AT1G22270.1 | Symbols: | Trm112p-like protein | chr1:7865548-7865922 FORWARD LENGTH=124	1	2	2	2	2	1	2	2	2	1	2	2	2	1	2	2	21.8	21.8	21.8	13.961	124	124	2	1	2	2	3.3027e-07	21.8	14.5	21.8	21.8	313020000	111300000	51474000	71510000	78734000	0	0	76600000	100790000	1	0	1	1
>AT1G22280.1 | Symbols: PAPP2C | phytochrome-associated protein phosphatase type 2C | chr1:7874236-7875496 FORWARD LENGTH=281;>AT1G22280.3 | Symbols: PAPP2C | phytochrome-associated protein phosphatase type 2C | chr1:7874236-7875496 FORWARD LENGTH=287;>AT1G22280.2 | Symbols: | phytochrome-associated protein phosphatase type 2C | chr1:7874236-7875054 FORWARD LENGTH=199	>AT1G22280.1 | Symbols: PAPP2C | phytochrome-associated protein phosphatase type 2C | chr1:7874236-7875496 FORWARD LENGTH=281;>AT1G22280.3 | Symbols: PAPP2C | phytochrome-associated protein phosphatase type 2C | chr1:7874236-7875496 FORWARD LENGTH=287;>AT1G22280.2 | Symbols: | phytochrome-associated protein phosphatase type 2C | chr1:7874236-7875054 FORWARD LENGTH=199	7;6;4	7;6;4	7;6;4	>AT1G22280.1 | Symbols: PAPP2C | phytochrome-associated protein phosphatase type 2C | chr1:7874236-7875496 FORWARD LENGTH=281;>AT1G22280.3 | Symbols: PAPP2C | phytochrome-associated protein phosphatase type 2C | chr1:7874236-7875496 FORWARD LENGTH=287;>AT1	3	7	7	7	5	5	5	5	5	5	5	5	5	5	5	5	30.2	30.2	30.2	30.721	281	281;287;199	8	8	9	7	2.5204e-50	23.5	23.5	21	21	2477300000	838190000	811870000	437070000	390180000	536700000	541560000	413740000	551100000	4	3	6	4
>AT1G22300.3 | Symbols: GRF10, GF14 EPSILON | general regulatory factor 10 | chr1:7879601-7881103 REVERSE LENGTH=251;>AT1G22300.2 | Symbols: GRF10, GF14 EPSILON | general regulatory factor 10 | chr1:7879244-7881103 REVERSE LENGTH=254;>AT1G22300.1 | Symbols: GRF10, 14-3-3EPSILON, GF14 EPSILON | general regulatory factor 10 | chr1:7879146-7881103 REVERSE LENGTH=254;>AT1G22290.1 | Symbols: | 14-3-3 …	>AT1G22300.3 | Symbols: GRF10, GF14 EPSILON | general regulatory factor 10 | chr1:7879601-7881103 REVERSE LENGTH=251;>AT1G22300.2 | Symbols: GRF10, GF14 EPSILON | general regulatory factor 10 | chr1:7879244-7881103 REVERSE LENGTH=254;>AT1G22300.1 | Symbols: GRF10, 14-3-3EPSILON, GF14 EPSILON | general regulatory factor 10 | chr1:7879146-7881103 REVERSE LENGTH=254	12;12;12;1;1	11;11;11;1;1	8;8;8;1;1	>AT1G22300.3 | Symbols: GRF10, GF14 EPSILON | general regulatory factor 10 | chr1:7879601-7881103 REVERSE LENGTH=251;>AT1G22300.2 | Symbols: GRF10, GF14 EPSILON | general regulatory factor 10 | chr1:7879244-7881103 REVERSE LENGTH=254;>AT1G22300.1 | Symbols	5	12	11	8	10	11	12	11	9	10	11	10	6	7	8	7	50.2	46.2	37.8	28.568	251	251;254;254;196;216	18	19	18	17	9.6525e-169	43.4	47	50.2	50.2	19695000000	6250200000	5211300000	4523500000	3709800000	6253700000	5350000000	4178400000	4187900000	17	17	18	17
>AT1G22360.1 | Symbols: AtUGT85A2, UGT85A2 | UDP-glucosyl transferase 85A2 | chr1:7895068-7897527 REVERSE LENGTH=481;>AT1G22360.2 | Symbols: AtUGT85A2, UGT85A2 | UDP-glucosyl transferase 85A2 | chr1:7895068-7897527 REVERSE LENGTH=469;>AT1G22380.1 | Symbols: AtUGT85A3, UGT85A3 | UDP-glucosyl transferase 85A3 | chr1:7900522-7902332 REVERSE LENGTH=488	>AT1G22360.1 | Symbols: AtUGT85A2, UGT85A2 | UDP-glucosyl transferase 85A2 | chr1:7895068-7897527 REVERSE LENGTH=481;>AT1G22360.2 | Symbols: AtUGT85A2, UGT85A2 | UDP-glucosyl transferase 85A2 | chr1:7895068-7897527 REVERSE LENGTH=469	12;10;1	12;10;1	9;9;0	>AT1G22360.1 | Symbols: AtUGT85A2, UGT85A2 | UDP-glucosyl transferase 85A2 | chr1:7895068-7897527 REVERSE LENGTH=481;>AT1G22360.2 | Symbols: AtUGT85A2, UGT85A2 | UDP-glucosyl transferase 85A2 | chr1:7895068-7897527 REVERSE LENGTH=469	3	12	12	9	10	9	9	10	10	9	9	10	7	7	7	9	28.1	28.1	24.3	54.364	481	481;469;488	12	11	13	12	7.2338e-75	23.7	21.8	20.8	26.2	6481600000	1625800000	1692200000	1665100000	1498500000	1616200000	1918700000	1495700000	1800500000	6	9	8	10
>AT1G22400.1 | Symbols: UGT85A1, ATUGT85A1 | UDP-Glycosyltransferase superfamily protein | chr1:7903851-7906607 REVERSE LENGTH=489	>AT1G22400.1 | Symbols: UGT85A1, ATUGT85A1 | UDP-Glycosyltransferase superfamily protein | chr1:7903851-7906607 REVERSE LENGTH=489	5	2	2	>AT1G22400.1 | Symbols: UGT85A1, ATUGT85A1 | UDP-Glycosyltransferase superfamily protein | chr1:7903851-7906607 REVERSE LENGTH=489	1	5	2	2	5	3	3	2	2	1	1	1	2	1	1	1	9.6	5.9	5.9	55.01	489	489	2	1	1	1	1.3659e-11	9.6	4.9	4.9	4.9	106040000	23666000	17538000	31912000	32920000	0	0	0	41356000	1	0	0	0
>AT1G22410.1 | Symbols: | Class-II DAHP synthetase family protein | chr1:7912120-7914742 FORWARD LENGTH=527	>AT1G22410.1 | Symbols: | Class-II DAHP synthetase family protein | chr1:7912120-7914742 FORWARD LENGTH=527	14	13	12	>AT1G22410.1 | Symbols: | Class-II DAHP synthetase family protein | chr1:7912120-7914742 FORWARD LENGTH=527	1	14	13	12	12	13	13	13	11	12	12	12	10	11	11	11	30.9	28.8	26.6	58.326	527	527	14	15	16	18	8.5402e-91	29	28.7	29	29	8554200000	1623900000	2438200000	2513300000	1978800000	1935300000	2361800000	2753500000	2480500000	8	9	15	13
>AT1G22430.2 | Symbols: | GroES-like zinc-binding dehydrogenase family protein | chr1:7919235-7921594 FORWARD LENGTH=388;>AT1G22430.1 | Symbols: | GroES-like zinc-binding dehydrogenase family protein | chr1:7919235-7921594 FORWARD LENGTH=388	>AT1G22430.2 | Symbols: | GroES-like zinc-binding dehydrogenase family protein | chr1:7919235-7921594 FORWARD LENGTH=388;>AT1G22430.1 | Symbols: | GroES-like zinc-binding dehydrogenase family protein | chr1:7919235-7921594 FORWARD LENGTH=388	3;3	3;3	3;3	>AT1G22430.2 | Symbols: | GroES-like zinc-binding dehydrogenase family protein | chr1:7919235-7921594 FORWARD LENGTH=388;>AT1G22430.1 | Symbols: | GroES-like zinc-binding dehydrogenase family protein | chr1:7919235-7921594 FORWARD LENGTH=388	2	3	3	3	0	0	3	1	0	0	3	1	0	0	3	1	11.9	11.9	11.9	42.529	388	388;388			3	1	1.5927e-10	0	0	11.9	5.4	89189000	0	0	49312000	39877000	0	0	54122000	0	0	0	1	1
>AT1G22440.1 | Symbols: | Zinc-binding alcohol dehydrogenase family protein | chr1:7922560-7924759 FORWARD LENGTH=386	>AT1G22440.1 | Symbols: | Zinc-binding alcohol dehydrogenase family protein | chr1:7922560-7924759 FORWARD LENGTH=386	13	13	13	>AT1G22440.1 | Symbols: | Zinc-binding alcohol dehydrogenase family protein | chr1:7922560-7924759 FORWARD LENGTH=386	1	13	13	13	12	10	13	11	12	10	13	11	12	10	13	11	43.3	43.3	43.3	42.383	386	386	16	12	16	13	5.1185e-96	39.4	30.6	43.3	38.1	7513200000	2100900000	1464100000	2146900000	1801400000	1804400000	1765500000	2275800000	2370000000	8	8	16	15
>AT1G22450.1 | Symbols: COX6B, ATCOX6B2 | cytochrome C oxidase 6B | chr1:7925447-7926918 FORWARD LENGTH=191	>AT1G22450.1 | Symbols: COX6B, ATCOX6B2 | cytochrome C oxidase 6B | chr1:7925447-7926918 FORWARD LENGTH=191	4	4	4	>AT1G22450.1 | Symbols: COX6B, ATCOX6B2 | cytochrome C oxidase 6B | chr1:7925447-7926918 FORWARD LENGTH=191	1	4	4	4	3	3	4	4	3	3	4	4	3	3	4	4	33	33	33	21.195	191	191	5	4	4	5	1.4929e-22	27.7	27.7	33	33	1633400000	543200000	431050000	324950000	334170000	577900000	509780000	323830000	376230000	3	3	3	3
>AT1G22510.1 | Symbols: | RING/U-box protein with domain of unknown function (DUF 1232) | chr1:7951003-7952597 REVERSE LENGTH=185;>AT1G22510.2 | Symbols: | RING/U-box protein with domain of unknown function (DUF 1232) | chr1:7951003-7952593 REVERSE LENGTH=203	>AT1G22510.1 | Symbols: | RING/U-box protein with domain of unknown function (DUF 1232) | chr1:7951003-7952597 REVERSE LENGTH=185;>AT1G22510.2 | Symbols: | RING/U-box protein with domain of unknown function (DUF 1232) | chr1:7951003-7952593 REVERSE LENGTH=203	4;4	4;4	2;2	>AT1G22510.1 | Symbols: | RING/U-box protein with domain of unknown function (DUF 1232) | chr1:7951003-7952597 REVERSE LENGTH=185;>AT1G22510.2 | Symbols: | RING/U-box protein with domain of unknown function (DUF 1232) | chr1:7951003-7952593 REVERSE LENGT	2	4	4	2	3	3	3	4	3	3	3	4	2	2	2	2	22.7	22.7	14.1	20.78	185	185;203	3	3	4	5	1.998e-31	18.9	18.9	18.9	22.7	947160000	278690000	265310000	206300000	196860000	246630000	257970000	201120000	277320000	1	2	2	4
>AT1G22530.1 | Symbols: PATL2 | PATELLIN 2 | chr1:7955773-7958326 REVERSE LENGTH=683	>AT1G22530.1 | Symbols: PATL2 | PATELLIN 2 | chr1:7955773-7958326 REVERSE LENGTH=683	23	23	21	>AT1G22530.1 | Symbols: PATL2 | PATELLIN 2 | chr1:7955773-7958326 REVERSE LENGTH=683	1	23	23	21	19	21	21	21	19	21	21	21	17	19	19	19	40.7	40.7	37.8	76.007	683	683	27	27	27	26	2.8167e-175	34.6	37.2	37.9	37.6	20702000000	6001800000	6785200000	3936700000	3978400000	5756100000	6199800000	5243500000	5509100000	24	25	20	28
>AT1G22550.1 | Symbols: | Major facilitator superfamily protein | chr1:7966608-7968552 REVERSE LENGTH=564	>AT1G22550.1 | Symbols: | Major facilitator superfamily protein | chr1:7966608-7968552 REVERSE LENGTH=564	2	2	2	>AT1G22550.1 | Symbols: | Major facilitator superfamily protein | chr1:7966608-7968552 REVERSE LENGTH=564	1	2	2	2	0	1	1	1	0	1	1	1	0	1	1	1	6.4	6.4	6.4	62.167	564	564		1	1	1	1.6263e-11	0	3.7	2.7	2.7	92814000	0	15400000	43058000	34357000	0	0	0	43161000	0	1	1	2
>AT1G22650.1 | Symbols: | Plant neutral invertase family protein | chr1:8013529-8015647 REVERSE LENGTH=534	>AT1G22650.1 | Symbols: | Plant neutral invertase family protein | chr1:8013529-8015647 REVERSE LENGTH=534	3	1	1	>AT1G22650.1 | Symbols: | Plant neutral invertase family protein | chr1:8013529-8015647 REVERSE LENGTH=534	1	3	1	1	1	2	3	3	0	0	1	1	0	0	1	1	9.4	3.4	3.4	60.867	534	534			1	1	3.2053e-17	2.4	6	9.4	9.4	34147000	0	0	11870000	22277000	0	0	0	27986000	0	0	0	1
>AT1G22730.1 | Symbols: | MA3 domain-containing protein | chr1:8046511-8048769 FORWARD LENGTH=693	>AT1G22730.1 | Symbols: | MA3 domain-containing protein | chr1:8046511-8048769 FORWARD LENGTH=693	2	2	2	>AT1G22730.1 | Symbols: | MA3 domain-containing protein | chr1:8046511-8048769 FORWARD LENGTH=693	1	2	2	2	2	0	0	0	2	0	0	0	2	0	0	0	3.9	3.9	3.9	77.243	693	693	2				7.4728e-05	3.9	0	0	0	47654000	47654000	0	0	0	47654000	0	0	0	2	0	0	0
>AT1G22740.1 | Symbols: RAB7, ATRABG3B, RAB75, RABG3B | RAB GTPase homolog G3B | chr1:8049247-8050494 FORWARD LENGTH=203	>AT1G22740.1 | Symbols: RAB7, ATRABG3B, RAB75, RABG3B | RAB GTPase homolog G3B | chr1:8049247-8050494 FORWARD LENGTH=203	6	5	4	>AT1G22740.1 | Symbols: RAB7, ATRABG3B, RAB75, RABG3B | RAB GTPase homolog G3B | chr1:8049247-8050494 FORWARD LENGTH=203	1	6	5	4	4	3	5	6	3	3	4	5	3	3	3	4	40.9	36	29.1	22.945	203	203	3	3	5	7	4.17e-69	27.1	22.2	34	40.9	728950000	99826000	91173000	251570000	286380000	151470000	127340000	171270000	237620000	3	2	5	5
>AT1G22750.3 | Symbols: | unknown protein; FUNCTIONS IN: molecular_function unknown; INVOLVED IN: biological_process unknown; LOCATED IN: vacuole; EXPRESSED IN: 23 plant structures; EXPRESSED DURING: 15 growth stages; CONTAINS InterPro DOMAIN/s: Protein of unknown function DUF1475 (InterPro:IPR009943); Has 35333 Blast hits to 34131 proteins in 2444 species: Archae - 798; Bacteria - 22429; Metazoa…	>AT1G22750.3 | Symbols: | unknown protein; FUNCTIONS IN: molecular_function unknown; INVOLVED IN: biological_process unknown; LOCATED IN: vacuole; EXPRESSED IN: 23 plant structures; EXPRESSED DURING: 15 growth stages; CONTAINS InterPro DOMAIN/s: Protein of unknown function DUF1475 (InterPro:IPR009943); Has 35333 Blast hits to 34131 proteins in 2444 species: Archae - 798; Bacteria - 22429; Metazoa…	3;3;3;3	3;3;3;3	3;3;3;3	>AT1G22750.3 | Symbols: | unknown protein; FUNCTIONS IN: molecular_function unknown; INVOLVED IN: biological_process unknown; LOCATED IN: vacuole; EXPRESSED IN: 23 plant structures; EXPRESSED DURING: 15 growth stages; CONTAINS InterPro DOMAIN/s: Protein o	4	3	3	3	1	1	3	2	1	1	3	2	1	1	3	2	18.3	18.3	18.3	26.983	241	241;244;247;257	1	1	4	3	2.1673e-30	4.1	4.1	18.3	11.2	405430000	133010000	120320000	82764000	69333000	0	0	77287000	100650000	1	0	1	1
>AT4G09800.1 | Symbols: RPS18C | S18 ribosomal protein | chr4:6173818-6174963 FORWARD LENGTH=152;>AT1G34030.1 | Symbols: | Ribosomal protein S13/S18 family | chr1:12370285-12371465 REVERSE LENGTH=152;>AT1G22780.1 | Symbols: PFL, RPS18A, PFL1 | Ribosomal protein S13/S18 family | chr1:8067990-8069163 FORWARD LENGTH=152	>AT4G09800.1 | Symbols: RPS18C | S18 ribosomal protein | chr4:6173818-6174963 FORWARD LENGTH=152;>AT1G34030.1 | Symbols: | Ribosomal protein S13/S18 family | chr1:12370285-12371465 REVERSE LENGTH=152;>AT1G22780.1 | Symbols: PFL, RPS18A, PFL1 | Ribosomal protein S13/S18 family | chr1:8067990-8069163 FORWARD LENGTH=152	8;8;8	8;8;8	8;8;8	>AT4G09800.1 | Symbols: RPS18C | S18 ribosomal protein | chr4:6173818-6174963 FORWARD LENGTH=152;>AT1G34030.1 | Symbols: | Ribosomal protein S13/S18 family | chr1:12370285-12371465 REVERSE LENGTH=152;>AT1G22780.1 | Symbols: PFL, RPS18A, PFL1 | Ribosomal p	3	8	8	8	7	8	7	8	7	8	7	8	7	8	7	8	52.6	52.6	52.6	17.545	152	152;152;152	22	17	20	23	4.2891e-196	46.7	52.6	47.4	52.6	58628000000	18335000000	13525000000	13911000000	12856000000	15974000000	13089000000	14947000000	13933000000	30	25	26	26
>AT1G22800.1 | Symbols: | S-adenosyl-L-methionine-dependent methyltransferases superfamily protein | chr1:8072020-8074039 FORWARD LENGTH=355	>AT1G22800.1 | Symbols: | S-adenosyl-L-methionine-dependent methyltransferases superfamily protein | chr1:8072020-8074039 FORWARD LENGTH=355	2	2	2	>AT1G22800.1 | Symbols: | S-adenosyl-L-methionine-dependent methyltransferases superfamily protein | chr1:8072020-8074039 FORWARD LENGTH=355	1	2	2	2	1	1	2	1	1	1	2	1	1	1	2	1	7.6	7.6	7.6	39.365	355	355	1	1	2	1	2.8972e-08	3.1	3.1	7.6	4.5	292140000	63073000	88749000	79009000	61304000	0	0	86715000	0	1	0	1	1
>AT1G22840.2 | Symbols: CYTC-1, ATCYTC-A | CYTOCHROME C-1 | chr1:8079384-8080246 FORWARD LENGTH=102;>AT1G22840.1 | Symbols: CYTC-1, ATCYTC-A | CYTOCHROME C-1 | chr1:8079384-8080286 FORWARD LENGTH=114	>AT1G22840.2 | Symbols: CYTC-1, ATCYTC-A | CYTOCHROME C-1 | chr1:8079384-8080246 FORWARD LENGTH=102;>AT1G22840.1 | Symbols: CYTC-1, ATCYTC-A | CYTOCHROME C-1 | chr1:8079384-8080286 FORWARD LENGTH=114	2;2	1;1	1;1	>AT1G22840.2 | Symbols: CYTC-1, ATCYTC-A | CYTOCHROME C-1 | chr1:8079384-8080246 FORWARD LENGTH=102;>AT1G22840.1 | Symbols: CYTC-1, ATCYTC-A | CYTOCHROME C-1 | chr1:8079384-8080286 FORWARD LENGTH=114	2	2	1	1	2	2	2	2	1	1	1	1	1	1	1	1	25.5	14.7	14.7	11.114	102	102;114	1	1	1	1	2.0101e-11	25.5	25.5	25.5	25.5	799510000	268600000	192830000	191570000	146510000	0	0	0	184060000	1	1	1	1
>AT1G22920.2 | Symbols: CSN5A, JAB1, AJH1 | COP9 signalosome 5A | chr1:8109998-8111895 REVERSE LENGTH=351;>AT1G22920.1 | Symbols: CSN5A, JAB1, AJH1 | COP9 signalosome 5A | chr1:8109882-8111895 REVERSE LENGTH=357	>AT1G22920.2 | Symbols: CSN5A, JAB1, AJH1 | COP9 signalosome 5A | chr1:8109998-8111895 REVERSE LENGTH=351;>AT1G22920.1 | Symbols: CSN5A, JAB1, AJH1 | COP9 signalosome 5A | chr1:8109882-8111895 REVERSE LENGTH=357	1;1	1;1	1;1	>AT1G22920.2 | Symbols: CSN5A, JAB1, AJH1 | COP9 signalosome 5A | chr1:8109998-8111895 REVERSE LENGTH=351;>AT1G22920.1 | Symbols: CSN5A, JAB1, AJH1 | COP9 signalosome 5A | chr1:8109882-8111895 REVERSE LENGTH=357	2	1	1	1	1	1	1	1	1	1	1	1	1	1	1	1	4.6	4.6	4.6	39.105	351	351;357	1	1	1	1	3.1363e-08	4.6	4.6	4.6	4.6	152520000	54983000	45983000	23547000	28005000	0	0	0	35181000	1	1	1	0
>AT1G22940.1 | Symbols: TH1, TH-1, THIE | thiamin biosynthesis protein, putative | chr1:8122384-8124908 FORWARD LENGTH=522	>AT1G22940.1 | Symbols: TH1, TH-1, THIE | thiamin biosynthesis protein, putative | chr1:8122384-8124908 FORWARD LENGTH=522	2	2	2	>AT1G22940.1 | Symbols: TH1, TH-1, THIE | thiamin biosynthesis protein, putative | chr1:8122384-8124908 FORWARD LENGTH=522	1	2	2	2	2	2	1	1	2	2	1	1	2	2	1	1	4.8	4.8	4.8	55.812	522	522	2	2	1	1	0.00016236	4.8	4.8	2.5	2.5	211370000	97473000	57889000	21984000	34025000	98024000	65000000	0	0	3	0	0	0
>AT1G23170.2 | Symbols: | Protein of unknown function DUF2359, transmembrane | chr1:8212724-8215516 FORWARD LENGTH=615;>AT1G23170.1 | Symbols: | Protein of unknown function DUF2359, transmembrane | chr1:8212724-8215516 FORWARD LENGTH=569	>AT1G23170.2 | Symbols: | Protein of unknown function DUF2359, transmembrane | chr1:8212724-8215516 FORWARD LENGTH=615;>AT1G23170.1 | Symbols: | Protein of unknown function DUF2359, transmembrane | chr1:8212724-8215516 FORWARD LENGTH=569	5;4	1;1	1;1	>AT1G23170.2 | Symbols: | Protein of unknown function DUF2359, transmembrane | chr1:8212724-8215516 FORWARD LENGTH=615;>AT1G23170.1 | Symbols: | Protein of unknown function DUF2359, transmembrane | chr1:8212724-8215516 FORWARD LENGTH=569	2	5	1	1	4	4	3	4	0	0	0	1	0	0	0	1	8	2	2	66.672	615	615;569				1	1.0536e-12	6	6	4.6	6.5	8695400	0	0	0	8695400	0	0	0	10924000	0	0	0	1
>AT1G23190.1 | Symbols: PGM3 | Phosphoglucomutase/phosphomannomutase family protein | chr1:8219946-8224186 FORWARD LENGTH=583	>AT1G23190.1 | Symbols: PGM3 | Phosphoglucomutase/phosphomannomutase family protein | chr1:8219946-8224186 FORWARD LENGTH=583	24	24	14	>AT1G23190.1 | Symbols: PGM3 | Phosphoglucomutase/phosphomannomutase family protein | chr1:8219946-8224186 FORWARD LENGTH=583	1	24	24	14	20	22	23	24	20	22	23	24	11	12	13	14	53.9	53.9	32.6	63.17	583	583	31	35	31	34	1.6466e-165	47.9	49.2	52.5	53.9	34250000000	9980700000	10105000000	7338100000	6826600000	8985300000	9743900000	9030500000	8874600000	26	30	28	29
>AT1G70600.1 | Symbols: | Ribosomal protein L18e/L15 superfamily protein | chr1:26621168-26621608 REVERSE LENGTH=146;>AT1G23290.1 | Symbols: RPL27A, RPL27AB | Ribosomal protein L18e/L15 superfamily protein | chr1:8263007-8263447 FORWARD LENGTH=146	>AT1G70600.1 | Symbols: | Ribosomal protein L18e/L15 superfamily protein | chr1:26621168-26621608 REVERSE LENGTH=146;>AT1G23290.1 | Symbols: RPL27A, RPL27AB | Ribosomal protein L18e/L15 superfamily protein | chr1:8263007-8263447 FORWARD LENGTH=146	6;6	6;6	6;6	>AT1G70600.1 | Symbols: | Ribosomal protein L18e/L15 superfamily protein | chr1:26621168-26621608 REVERSE LENGTH=146;>AT1G23290.1 | Symbols: RPL27A, RPL27AB | Ribosomal protein L18e/L15 superfamily protein | chr1:8263007-8263447 FORWARD LENGTH=146	2	6	6	6	6	4	4	5	6	4	4	5	6	4	4	5	43.8	43.8	43.8	16.455	146	146;146	8	7	6	7	7.502e-32	43.8	30.8	30.8	37.7	27293000000	7295200000	6580700000	6247500000	7169400000	7561900000	7576400000	6974200000	8489900000	13	5	9	12
>AT1G23310.1 | Symbols: GGT1, AOAT1, GGAT1 | glutamate:glyoxylate aminotransferase | chr1:8268720-8271329 REVERSE LENGTH=481;>AT1G23310.2 | Symbols: GGT1, AOAT1, GGAT1 | glutamate:glyoxylate aminotransferase | chr1:8268808-8271329 REVERSE LENGTH=441	>AT1G23310.1 | Symbols: GGT1, AOAT1, GGAT1 | glutamate:glyoxylate aminotransferase | chr1:8268720-8271329 REVERSE LENGTH=481;>AT1G23310.2 | Symbols: GGT1, AOAT1, GGAT1 | glutamate:glyoxylate aminotransferase | chr1:8268808-8271329 REVERSE LENGTH=441	11;10	11;10	6;5	>AT1G23310.1 | Symbols: GGT1, AOAT1, GGAT1 | glutamate:glyoxylate aminotransferase | chr1:8268720-8271329 REVERSE LENGTH=481;>AT1G23310.2 | Symbols: GGT1, AOAT1, GGAT1 | glutamate:glyoxylate aminotransferase | chr1:8268808-8271329 REVERSE LENGTH=441	2	11	11	6	10	9	9	9	10	9	9	9	6	5	5	4	33.3	33.3	14.6	53.301	481	481;441	11	9	9	9	5.9044e-59	28.9	25.8	28.1	29.5	3210400000	1008900000	851460000	649630000	700440000	645610000	1081100000	1048700000	790550000	5	5	6	5
>AT1G23410.1 | Symbols: | Ribosomal protein S27a / Ubiquitin family protein | chr1:8314940-8315410 FORWARD LENGTH=156;>AT3G62250.1 | Symbols: UBQ5 | ubiquitin 5 | chr3:23037138-23037611 FORWARD LENGTH=157;>AT2G47110.2 | Symbols: UBQ6 | ubiquitin 6 | chr2:19344701-19345174 FORWARD LENGTH=157;>AT2G47110.1 | Symbols: UBQ6 | ubiquitin 6 | chr2:19344701-19345174 FORWARD LENGTH=157;>AT3G52590.1 | Symbo…	>AT1G23410.1 | Symbols: | Ribosomal protein S27a / Ubiquitin family protein | chr1:8314940-8315410 FORWARD LENGTH=156;>AT3G62250.1 | Symbols: UBQ5 | ubiquitin 5 | chr3:23037138-23037611 FORWARD LENGTH=157;>AT2G47110.2 | Symbols: UBQ6 | ubiquitin 6 | chr2:19344701-19345174 FORWARD LENGTH=157;>AT2G47110.1 | Symbols: UBQ6 | ubiquitin 6 | chr2:19344701-19345174 FORWARD LENGTH=157;>AT3G52590.1 | Symbo…	6;6;6;6;5;5;5;5;5;5;5;5;5;5;5;5;5;5;5;5;5;5;5;5;5;5;5;5;5;3	6;6;6;6;5;5;5;5;5;5;5;5;5;5;5;5;5;5;5;5;5;5;5;5;5;5;5;5;5;3	6;6;6;6;5;5;5;5;5;5;5;5;5;5;5;5;5;5;5;5;5;5;5;5;5;5;5;5;5;3	>AT1G23410.1 | Symbols: | Ribosomal protein S27a / Ubiquitin family protein | chr1:8314940-8315410 FORWARD LENGTH=156;>AT3G62250.1 | Symbols: UBQ5 | ubiquitin 5 | chr3:23037138-23037611 FORWARD LENGTH=157;>AT2G47110.2 | Symbols: UBQ6 | ubiquitin 6 | chr2:	30	6	6	6	6	6	6	6	6	6	6	6	6	6	6	6	35.3	35.3	35.3	17.671	156	156;157;157;157;128;128;153;154;156;229;229;229;229;229;230;305;305;305;306;306;306;319;322;381;381;381;382;457;457;631	13	16	11	14	5.476e-31	35.3	35.3	35.3	35.3	14938000000	5293000000	2885400000	3714600000	3044900000	5877400000	4290100000	3298600000	2479000000	13	12	8	12
>AT1G23440.1 | Symbols: | Peptidase C15, pyroglutamyl peptidase I-like | chr1:8321940-8324019 FORWARD LENGTH=217;>AT1G23440.2 | Symbols: | Peptidase C15, pyroglutamyl peptidase I-like | chr1:8321940-8322224 FORWARD LENGTH=94	>AT1G23440.1 | Symbols: | Peptidase C15, pyroglutamyl peptidase I-like | chr1:8321940-8324019 FORWARD LENGTH=217	4;1	4;1	4;1	>AT1G23440.1 | Symbols: | Peptidase C15, pyroglutamyl peptidase I-like | chr1:8321940-8324019 FORWARD LENGTH=217	2	4	4	4	3	3	4	2	3	3	4	2	3	3	4	2	21.2	21.2	21.2	23.618	217	217;94	4	5	5	2	9.0727e-30	16.1	16.1	21.2	10.6	1428100000	588750000	448740000	236520000	154080000	464030000	522920000	222600000	228250000	3	4	1	2
>AT1G23480.3 | Symbols: ATCSLA03, CSLA03, ATCSLA3, CSLA3 | cellulose synthase-like A3 | chr1:8334232-8336230 FORWARD LENGTH=484;>AT1G23480.2 | Symbols: ATCSLA03, CSLA03, ATCSLA3, CSLA3 | cellulose synthase-like A3 | chr1:8333917-8336230 FORWARD LENGTH=556;>AT1G23480.1 | Symbols: ATCSLA03, CSLA03, ATCSLA3, CSLA3 | cellulose synthase-like A3 | chr1:8333917-8336230 FORWARD LENGTH=556	>AT1G23480.3 | Symbols: ATCSLA03, CSLA03, ATCSLA3, CSLA3 | cellulose synthase-like A3 | chr1:8334232-8336230 FORWARD LENGTH=484;>AT1G23480.2 | Symbols: ATCSLA03, CSLA03, ATCSLA3, CSLA3 | cellulose synthase-like A3 | chr1:8333917-8336230 FORWARD LENGTH=556;>AT1G23480.1 | Symbols: ATCSLA03, CSLA03, ATCSLA3, CSLA3 | cellulose synthase-like A3 | chr1:8333917-8336230 FORWARD LENGTH=556	1;1;1	1;1;1	1;1;1	>AT1G23480.3 | Symbols: ATCSLA03, CSLA03, ATCSLA3, CSLA3 | cellulose synthase-like A3 | chr1:8334232-8336230 FORWARD LENGTH=484;>AT1G23480.2 | Symbols: ATCSLA03, CSLA03, ATCSLA3, CSLA3 | cellulose synthase-like A3 | chr1:8333917-8336230 FORWARD LENGTH=556;	3	1	1	1	1	1	1	1	1	1	1	1	1	1	1	1	2.3	2.3	2.3	56.149	484	484;556;556	1	1	1	1	0.00035336	2.3	2.3	2.3	2.3	179740000	55270000	73935000	27802000	22729000	0	0	0	28554000	1	0	0	1
>AT1G70490.3 | Symbols: ATARFA1D, ARFA1D | Ras-related small GTP-binding family protein | chr1:26564162-26565152 REVERSE LENGTH=181;>AT1G70490.2 | Symbols: ATARFA1D, ARFA1D | Ras-related small GTP-binding family protein | chr1:26564162-26565152 REVERSE LENGTH=181;>AT1G70490.1 | Symbols: ATARFA1D, ARFA1D | Ras-related small GTP-binding family protein | chr1:26564162-26565152 REVERSE LENGTH=181;>AT…	>AT1G70490.3 | Symbols: ATARFA1D, ARFA1D | Ras-related small GTP-binding family protein | chr1:26564162-26565152 REVERSE LENGTH=181;>AT1G70490.2 | Symbols: ATARFA1D, ARFA1D | Ras-related small GTP-binding family protein | chr1:26564162-26565152 REVERSE LENGTH=181;>AT1G70490.1 | Symbols: ATARFA1D, ARFA1D | Ras-related small GTP-binding family protein | chr1:26564162-26565152 REVERSE LENGTH=181;>AT…	11;11;11;11	11;11;11;11	1;1;1;1	>AT1G70490.3 | Symbols: ATARFA1D, ARFA1D | Ras-related small GTP-binding family protein | chr1:26564162-26565152 REVERSE LENGTH=181;>AT1G70490.2 | Symbols: ATARFA1D, ARFA1D | Ras-related small GTP-binding family protein | chr1:26564162-26565152 REVERSE LEN	4	11	11	1	8	8	11	11	8	8	11	11	0	0	1	1	73.5	73.5	16	20.592	181	181;181;181;181	32	19	32	32	1.8528e-94	47.5	47.5	73.5	73.5	81006000000	25600000000	18895000000	18275000000	18236000000	15104000000	16787000000	18986000000	23762000000	34	29	51	48
>AT1G23730.1 | Symbols: ATBCA3, BCA3 | beta carbonic anhydrase 3 | chr1:8395965-8398014 FORWARD LENGTH=258	>AT1G23730.1 | Symbols: ATBCA3, BCA3 | beta carbonic anhydrase 3 | chr1:8395965-8398014 FORWARD LENGTH=258	3	1	1	>AT1G23730.1 | Symbols: ATBCA3, BCA3 | beta carbonic anhydrase 3 | chr1:8395965-8398014 FORWARD LENGTH=258	1	3	1	1	1	2	2	2	1	1	0	0	1	1	0	0	15.9	5	5	28.829	258	258	1	1			1.0909e-38	5	9.3	10.9	10.9	92477000	50601000	41875000	0	0	0	47417000	0	0	1	1	0	0
>AT1G23800.1 | Symbols: ALDH2B7, ALDH2B | aldehyde dehydrogenase 2B7 | chr1:8412238-8414804 REVERSE LENGTH=534	>AT1G23800.1 | Symbols: ALDH2B7, ALDH2B | aldehyde dehydrogenase 2B7 | chr1:8412238-8414804 REVERSE LENGTH=534	11	8	8	>AT1G23800.1 | Symbols: ALDH2B7, ALDH2B | aldehyde dehydrogenase 2B7 | chr1:8412238-8414804 REVERSE LENGTH=534	1	11	8	8	8	6	8	6	5	4	6	4	5	4	6	4	28.7	24.2	24.2	58.152	534	534	7	5	7	5	3.9176e-39	21.7	13.9	21.5	13.1	1206700000	314140000	264510000	398640000	229420000	298220000	321200000	354290000	332670000	4	3	4	4
>AT1G23820.1 | Symbols: SPDS1 | spermidine synthase 1 | chr1:8420278-8422724 FORWARD LENGTH=378;>AT1G23820.2 | Symbols: SPDS1 | spermidine synthase 1 | chr1:8420278-8422480 FORWARD LENGTH=327	>AT1G23820.1 | Symbols: SPDS1 | spermidine synthase 1 | chr1:8420278-8422724 FORWARD LENGTH=378;>AT1G23820.2 | Symbols: SPDS1 | spermidine synthase 1 | chr1:8420278-8422480 FORWARD LENGTH=327	11;9	11;9	8;6	>AT1G23820.1 | Symbols: SPDS1 | spermidine synthase 1 | chr1:8420278-8422724 FORWARD LENGTH=378;>AT1G23820.2 | Symbols: SPDS1 | spermidine synthase 1 | chr1:8420278-8422480 FORWARD LENGTH=327	2	11	11	8	7	9	11	10	7	9	11	10	6	7	8	8	44.7	44.7	33.6	41.679	378	378;327	9	13	16	14	1.5525e-94	28.3	35.7	44.7	41.3	5522700000	901220000	909800000	2365400000	1346300000	918470000	866760000	2003000000	1974300000	5	5	15	10
>AT1G23860.3 | Symbols: SRZ-21, SRZ21, RSZ21, At-RSZ21 | RS-containing zinc finger protein 21 | chr1:8428091-8429164 REVERSE LENGTH=164;>AT1G23860.4 | Symbols: RSZP21, RSZ21, At-RSZ21 | RS-containing zinc finger protein 21 | chr1:8428091-8429164 REVERSE LENGTH=183;>AT1G23860.2 | Symbols: SRZ-21, SRZ21, RSZ21, At-RSZ21 | RS-containing zinc finger protein 21 | chr1:8428091-8429164 REVERSE LENGTH=18…	>AT1G23860.3 | Symbols: SRZ-21, SRZ21, RSZ21, At-RSZ21 | RS-containing zinc finger protein 21 | chr1:8428091-8429164 REVERSE LENGTH=164;>AT1G23860.4 | Symbols: RSZP21, RSZ21, At-RSZ21 | RS-containing zinc finger protein 21 | chr1:8428091-8429164 REVERSE LENGTH=183;>AT1G23860.2 | Symbols: SRZ-21, SRZ21, RSZ21, At-RSZ21 | RS-containing zinc finger protein 21 | chr1:8428091-8429164 REVERSE LENGTH=18…	2;2;2;2;1;1;1	2;2;2;2;1;1;1	2;2;2;2;1;1;1	>AT1G23860.3 | Symbols: SRZ-21, SRZ21, RSZ21, At-RSZ21 | RS-containing zinc finger protein 21 | chr1:8428091-8429164 REVERSE LENGTH=164;>AT1G23860.4 | Symbols: RSZP21, RSZ21, At-RSZ21 | RS-containing zinc finger protein 21 | chr1:8428091-8429164 REVERSE LE	7	2	2	2	2	2	1	2	2	2	1	2	2	2	1	2	12.2	12.2	12.2	18.87	164	164;183;187;187;196;200;200	2	2	1	2	4.5638e-05	12.2	12.2	5.5	12.2	627020000	202630000	222810000	94820000	106760000	211820000	243100000	0	0	2	0	0	0
>AT1G23870.1 | Symbols: ATTPS9, TPS9 | trehalose-phosphatase/synthase 9 | chr1:8432695-8435506 FORWARD LENGTH=867	>AT1G23870.1 | Symbols: ATTPS9, TPS9 | trehalose-phosphatase/synthase 9 | chr1:8432695-8435506 FORWARD LENGTH=867	10	10	7	>AT1G23870.1 | Symbols: ATTPS9, TPS9 | trehalose-phosphatase/synthase 9 | chr1:8432695-8435506 FORWARD LENGTH=867	1	10	10	7	6	5	8	8	6	5	8	8	5	5	5	5	15.3	15.3	10.7	98.495	867	867	6	5	10	10	1.038e-40	8.9	7.8	12.5	12.6	1227700000	272120000	228980000	426660000	299910000	314140000	312290000	406380000	343630000	7	2	9	3
>AT1G23900.2 | Symbols: GAMMA-ADAPTIN 1 | gamma-adaptin 1 | chr1:8441379-8447152 FORWARD LENGTH=876;>AT1G23900.1 | Symbols: GAMMA-ADAPTIN 1, Gamma-ADR | gamma-adaptin 1 | chr1:8441379-8447152 FORWARD LENGTH=876;>AT1G23940.1 | Symbols: | ARM repeat superfamily protein | chr1:8466094-8469346 FORWARD LENGTH=495	>AT1G23900.2 | Symbols: GAMMA-ADAPTIN 1 | gamma-adaptin 1 | chr1:8441379-8447152 FORWARD LENGTH=876;>AT1G23900.1 | Symbols: GAMMA-ADAPTIN 1, Gamma-ADR | gamma-adaptin 1 | chr1:8441379-8447152 FORWARD LENGTH=876	14;14;2	14;14;2	12;12;2	>AT1G23900.2 | Symbols: GAMMA-ADAPTIN 1 | gamma-adaptin 1 | chr1:8441379-8447152 FORWARD LENGTH=876;>AT1G23900.1 | Symbols: GAMMA-ADAPTIN 1, Gamma-ADR | gamma-adaptin 1 | chr1:8441379-8447152 FORWARD LENGTH=876	3	14	14	12	10	14	12	14	10	14	12	14	9	12	11	12	22.1	22.1	19.9	96.468	876	876;876;495	14	17	17	18	1.7376e-101	16	22.1	19.9	22.1	3318400000	920140000	870480000	753650000	774140000	928600000	1043000000	776400000	854280000	10	9	11	14
>AT1G24030.2 | Symbols: | Protein kinase superfamily protein | chr1:8503394-8505195 FORWARD LENGTH=361;>AT1G24030.1 | Symbols: | Protein kinase superfamily protein | chr1:8503394-8505195 FORWARD LENGTH=375	>AT1G24030.2 | Symbols: | Protein kinase superfamily protein | chr1:8503394-8505195 FORWARD LENGTH=361;>AT1G24030.1 | Symbols: | Protein kinase superfamily protein | chr1:8503394-8505195 FORWARD LENGTH=375	2;2	2;2	2;2	>AT1G24030.2 | Symbols: | Protein kinase superfamily protein | chr1:8503394-8505195 FORWARD LENGTH=361;>AT1G24030.1 | Symbols: | Protein kinase superfamily protein | chr1:8503394-8505195 FORWARD LENGTH=375	2	2	2	2	2	2	2	2	2	2	2	2	2	2	2	2	6.1	6.1	6.1	40.819	361	361;375	2	2	2	2	0.0047163	6.1	6.1	6.1	6.1	304530000	90627000	114080000	60151000	39671000	0	127520000	67678000	0	0	1	1	0
>AT1G24050.1 | Symbols: | RNA-processing, Lsm domain | chr1:8507057-8508439 FORWARD LENGTH=188	>AT1G24050.1 | Symbols: | RNA-processing, Lsm domain | chr1:8507057-8508439 FORWARD LENGTH=188	1	1	1	>AT1G24050.1 | Symbols: | RNA-processing, Lsm domain | chr1:8507057-8508439 FORWARD LENGTH=188	1	1	1	1	0	1	0	0	0	1	0	0	0	1	0	0	9.6	9.6	9.6	20.491	188	188		1			0.0042896	0	9.6	0	0	13968000	0	13968000	0	0	0	15817000	0	0	0	1	0	0
>AT1G24100.1 | Symbols: UGT74B1 | UDP-glucosyl transferase 74B1 | chr1:8525547-8527010 REVERSE LENGTH=460	>AT1G24100.1 | Symbols: UGT74B1 | UDP-glucosyl transferase 74B1 | chr1:8525547-8527010 REVERSE LENGTH=460	9	9	9	>AT1G24100.1 | Symbols: UGT74B1 | UDP-glucosyl transferase 74B1 | chr1:8525547-8527010 REVERSE LENGTH=460	1	9	9	9	8	7	9	8	8	7	9	8	8	7	9	8	28	28	28	51.002	460	460	8	7	9	8	9.706e-72	23	19.6	28	26.5	5135000000	1177700000	1191900000	1662300000	1103100000	1440900000	1528900000	1405400000	1362300000	9	6	9	9
>AT1G24180.1 | Symbols: IAR4 | Thiamin diphosphate-binding fold (THDP-binding) superfamily protein | chr1:8560777-8563382 REVERSE LENGTH=393	>AT1G24180.1 | Symbols: IAR4 | Thiamin diphosphate-binding fold (THDP-binding) superfamily protein | chr1:8560777-8563382 REVERSE LENGTH=393	19	19	14	>AT1G24180.1 | Symbols: IAR4 | Thiamin diphosphate-binding fold (THDP-binding) superfamily protein | chr1:8560777-8563382 REVERSE LENGTH=393	1	19	19	14	16	16	19	18	16	16	19	18	12	12	14	14	52.7	52.7	41.7	43.358	393	393	25	27	32	30	1.6803e-147	44	43	52.7	50.4	23227000000	4879000000	6602000000	6586200000	5159900000	5491300000	6099700000	5589600000	5483000000	22	18	28	26
>AT1G24267.1 | Symbols: | Protein of unknown function (DUF1664) | chr1:8604451-8607241 REVERSE LENGTH=343;>AT1G24267.2 | Symbols: | Protein of unknown function (DUF1664) | chr1:8604451-8607241 REVERSE LENGTH=344	>AT1G24267.1 | Symbols: | Protein of unknown function (DUF1664) | chr1:8604451-8607241 REVERSE LENGTH=343;>AT1G24267.2 | Symbols: | Protein of unknown function (DUF1664) | chr1:8604451-8607241 REVERSE LENGTH=344	1;1	1;1	1;1	>AT1G24267.1 | Symbols: | Protein of unknown function (DUF1664) | chr1:8604451-8607241 REVERSE LENGTH=343;>AT1G24267.2 | Symbols: | Protein of unknown function (DUF1664) | chr1:8604451-8607241 REVERSE LENGTH=344	2	1	1	1	0	1	1	0	0	1	1	0	0	1	1	0	3.5	3.5	3.5	36.679	343	343;344		1	1		0.00017545	0	3.5	3.5	0	31126000	0	18552000	12574000	0	0	0	13800000	0	0	1	0	0
>AT1G24280.1 | Symbols: G6PD3 | glucose-6-phosphate dehydrogenase 3 | chr1:8609495-8612383 FORWARD LENGTH=599;>AT5G35790.1 | Symbols: G6PD1 | glucose-6-phosphate dehydrogenase 1 | chr5:13956879-13959686 REVERSE LENGTH=576	>AT1G24280.1 | Symbols: G6PD3 | glucose-6-phosphate dehydrogenase 3 | chr1:8609495-8612383 FORWARD LENGTH=599	17;5	5;0	5;0	>AT1G24280.1 | Symbols: G6PD3 | glucose-6-phosphate dehydrogenase 3 | chr1:8609495-8612383 FORWARD LENGTH=599	2	17	5	5	11	14	16	14	3	3	5	4	3	3	5	4	31.9	11	11	67.358	599	599;576	3	4	7	4	1.227e-102	20	24.4	28.9	26.5	1579900000	450190000	280060000	315970000	533640000	371820000	449770000	390520000	557870000	2	2	5	4
>AT1G24340.1 | Symbols: EMB260, EMB2421 | FAD/NAD(P)-binding oxidoreductase family protein | chr1:8635416-8638866 FORWARD LENGTH=709	>AT1G24340.1 | Symbols: EMB260, EMB2421 | FAD/NAD(P)-binding oxidoreductase family protein | chr1:8635416-8638866 FORWARD LENGTH=709	2	2	2	>AT1G24340.1 | Symbols: EMB260, EMB2421 | FAD/NAD(P)-binding oxidoreductase family protein | chr1:8635416-8638866 FORWARD LENGTH=709	1	2	2	2	1	1	0	0	1	1	0	0	1	1	0	0	4.1	4.1	4.1	78.32	709	709	1	1			0.00015503	2.5	1.6	0	0	82066000	49974000	32092000	0	0	49974000	0	0	0	1	1	0	0
>AT1G24350.2 | Symbols: | Acid phosphatase/vanadium-dependent haloperoxidase-related protein | chr1:8639407-8640313 REVERSE LENGTH=147;>AT1G24350.1 | Symbols: | Acid phosphatase/vanadium-dependent haloperoxidase-related protein | chr1:8639098-8640313 REVERSE LENGTH=168;>AT1G24350.3 | Symbols: | Acid phosphatase/vanadium-dependent haloperoxidase-related protein | chr1:8639098-8640313 REVERSE LENGT…	>AT1G24350.2 | Symbols: | Acid phosphatase/vanadium-dependent haloperoxidase-related protein | chr1:8639407-8640313 REVERSE LENGTH=147;>AT1G24350.1 | Symbols: | Acid phosphatase/vanadium-dependent haloperoxidase-related protein | chr1:8639098-8640313 REVERSE LENGTH=168;>AT1G24350.3 | Symbols: | Acid phosphatase/vanadium-dependent haloperoxidase-related protein | chr1:8639098-8640313 REVERSE LENGT…	1;1;1	1;1;1	1;1;1	>AT1G24350.2 | Symbols: | Acid phosphatase/vanadium-dependent haloperoxidase-related protein | chr1:8639407-8640313 REVERSE LENGTH=147;>AT1G24350.1 | Symbols: | Acid phosphatase/vanadium-dependent haloperoxidase-related protein | chr1:8639098-8640313 REV	3	1	1	1	1	1	1	1	1	1	1	1	1	1	1	1	15	15	15	16.009	147	147;168;186	1	1	1	1	1.9853e-08	15	15	15	15	122560000	30102000	24842000	39496000	28125000	0	0	0	35332000	1	0	1	1
>AT1G24360.1 | Symbols: | NAD(P)-binding Rossmann-fold superfamily protein | chr1:8640820-8643283 FORWARD LENGTH=319	>AT1G24360.1 | Symbols: | NAD(P)-binding Rossmann-fold superfamily protein | chr1:8640820-8643283 FORWARD LENGTH=319	9	9	9	>AT1G24360.1 | Symbols: | NAD(P)-binding Rossmann-fold superfamily protein | chr1:8640820-8643283 FORWARD LENGTH=319	1	9	9	9	6	6	8	8	6	6	8	8	6	6	8	8	39.8	39.8	39.8	33.548	319	319	7	7	10	10	3.1435e-23	21.6	23.8	32.6	32.6	5980100000	1426900000	1639100000	1369700000	1544400000	1727000000	2196400000	1182400000	1458200000	6	5	5	7
>AT1G24460.2 | Symbols: | unknown protein; FUNCTIONS IN: molecular_function unknown; INVOLVED IN: biological_process unknown; LOCATED IN: cellular_component unknown; EXPRESSED IN: 22 plant structures; EXPRESSED DURING: 14 growth stages; BEST Arabidopsis thaliana protein match is: unknown protein (TAIR:AT4G31570.1). | chr1:8666072-8672338 FORWARD LENGTH=1732;>AT1G24460.1 | Symbols: | unknown prote…	>AT1G24460.2 | Symbols: | unknown protein; FUNCTIONS IN: molecular_function unknown; INVOLVED IN: biological_process unknown; LOCATED IN: cellular_component unknown; EXPRESSED IN: 22 plant structures; EXPRESSED DURING: 14 growth stages; BEST Arabidopsis thaliana protein match is: unknown protein (TAIR:AT4G31570.1). | chr1:8666072-8672338 FORWARD LENGTH=1732;>AT1G24460.1 | Symbols: | unknown prote…	2;2	2;2	2;2	>AT1G24460.2 | Symbols: | unknown protein; FUNCTIONS IN: molecular_function unknown; INVOLVED IN: biological_process unknown; LOCATED IN: cellular_component unknown; EXPRESSED IN: 22 plant structures; EXPRESSED DURING: 14 growth stages; BEST Arabidopsis t	2	2	2	2	2	2	1	0	2	2	1	0	2	2	1	0	2	2	2	193.59	1732	1732;1807	2	2	1		5.528e-05	2	2	0.9	0	66768000	32743000	30284000	3741800	0	34165000	32869000	0	0	2	0	0	0
>AT1G24510.2 | Symbols: | TCP-1/cpn60 chaperonin family protein | chr1:8685504-8687660 REVERSE LENGTH=459;>AT1G24510.1 | Symbols: | TCP-1/cpn60 chaperonin family protein | chr1:8685504-8688101 REVERSE LENGTH=535	>AT1G24510.2 | Symbols: | TCP-1/cpn60 chaperonin family protein | chr1:8685504-8687660 REVERSE LENGTH=459;>AT1G24510.1 | Symbols: | TCP-1/cpn60 chaperonin family protein | chr1:8685504-8688101 REVERSE LENGTH=535	24;24	24;24	24;24	>AT1G24510.2 | Symbols: | TCP-1/cpn60 chaperonin family protein | chr1:8685504-8687660 REVERSE LENGTH=459;>AT1G24510.1 | Symbols: | TCP-1/cpn60 chaperonin family protein | chr1:8685504-8688101 REVERSE LENGTH=535	2	24	24	24	17	18	18	23	17	18	18	23	17	18	18	23	61.9	61.9	61.9	51.146	459	459;535	24	29	28	34	2.1408e-146	44.7	49	46.4	61.9	23001000000	5795900000	5998500000	6092500000	5113600000	6655500000	5523300000	5650600000	5467200000	19	18	19	27
>AT1G24610.1 | Symbols: | Rubisco methyltransferase family protein | chr1:8720906-8722711 REVERSE LENGTH=476	>AT1G24610.1 | Symbols: | Rubisco methyltransferase family protein | chr1:8720906-8722711 REVERSE LENGTH=476	1	1	1	>AT1G24610.1 | Symbols: | Rubisco methyltransferase family protein | chr1:8720906-8722711 REVERSE LENGTH=476	1	1	1	1	1	0	0	0	1	0	0	0	1	0	0	0	4	4	4	52.589	476	476	1				1.1262e-06	4	0	0	0	22504000	22504000	0	0	0	22504000	0	0	0	1	0	0	0
>AT1G25211.1 | Symbols: | F-box family protein | chr1:8835405-8836706 FORWARD LENGTH=433;>AT1G25150.1 | Symbols: | F-box family protein | chr1:8821027-8822328 FORWARD LENGTH=433;>AT1G25055.1 | Symbols: | F-box family protein | chr1:8806649-8807950 FORWARD LENGTH=433;>AT1G24881.1 | Symbols: | F-box family protein | chr1:8784120-8785421 FORWARD LENGTH=433;>AT1G24800.1 | Symbols: | F-box family prot…	>AT1G25211.1 | Symbols: | F-box family protein | chr1:8835405-8836706 FORWARD LENGTH=433;>AT1G25150.1 | Symbols: | F-box family protein | chr1:8821027-8822328 FORWARD LENGTH=433;>AT1G25055.1 | Symbols: | F-box family protein | chr1:8806649-8807950 FORWARD LENGTH=433;>AT1G24881.1 | Symbols: | F-box family protein | chr1:8784120-8785421 FORWARD LENGTH=433;>AT1G24800.1 | Symbols: | F-box family prot…	2;2;2;2;2	2;2;2;2;2	2;2;2;2;2	>AT1G25211.1 | Symbols: | F-box family protein | chr1:8835405-8836706 FORWARD LENGTH=433;>AT1G25150.1 | Symbols: | F-box family protein | chr1:8821027-8822328 FORWARD LENGTH=433;>AT1G25055.1 | Symbols: | F-box family protein | chr1:8806649-8807950 FORWA	5	2	2	2	2	1	2	2	2	1	2	2	2	1	2	2	6.7	6.7	6.7	49.643	433	433;433;433;433;433	3	1	2	3	4.5068e-20	6.7	3.9	6.7	6.7	204980000	54551000	30834000	45175000	74420000	0	0	49388000	70893000	1	1	2	1
>AT1G25230.1 | Symbols: | Calcineurin-like metallo-phosphoesterase superfamily protein | chr1:8840474-8842298 REVERSE LENGTH=339	>AT1G25230.1 | Symbols: | Calcineurin-like metallo-phosphoesterase superfamily protein | chr1:8840474-8842298 REVERSE LENGTH=339	2	2	2	>AT1G25230.1 | Symbols: | Calcineurin-like metallo-phosphoesterase superfamily protein | chr1:8840474-8842298 REVERSE LENGTH=339	1	2	2	2	1	1	0	1	1	1	0	1	1	1	0	1	7.7	7.7	7.7	38.241	339	339	1	1		1	2.8862e-05	4.1	4.1	0	3.5	48503000	24614000	17363000	0	6526500	0	19661000	0	0	1	1	0	1
>AT1G25350.1 | Symbols: OVA9 | glutamine-tRNA ligase, putative / glutaminyl-tRNA synthetase, putative / GlnRS, putative | chr1:8889280-8894205 REVERSE LENGTH=795;>AT1G25350.2 | Symbols: OVA9 | glutamine-tRNA ligase, putative / glutaminyl-tRNA synthetase, putative / GlnRS, putative | chr1:8889280-8894205 REVERSE LENGTH=800	>AT1G25350.1 | Symbols: OVA9 | glutamine-tRNA ligase, putative / glutaminyl-tRNA synthetase, putative / GlnRS, putative | chr1:8889280-8894205 REVERSE LENGTH=795;>AT1G25350.2 | Symbols: OVA9 | glutamine-tRNA ligase, putative / glutaminyl-tRNA synthetase, putative / GlnRS, putative | chr1:8889280-8894205 REVERSE LENGTH=800	17;16	17;16	17;16	>AT1G25350.1 | Symbols: OVA9 | glutamine-tRNA ligase, putative / glutaminyl-tRNA synthetase, putative / GlnRS, putative | chr1:8889280-8894205 REVERSE LENGTH=795;>AT1G25350.2 | Symbols: OVA9 | glutamine-tRNA ligase, putative / glutaminyl-tRNA synthetase, p	2	17	17	17	12	13	15	14	12	13	15	14	12	13	15	14	24.2	24.2	24.2	91.246	795	795;800	13	16	18	15	1.5256e-56	18.2	18.1	21.5	20.1	3513700000	887470000	1004500000	898060000	723600000	1000100000	931510000	809690000	880990000	8	8	13	13
>AT1G25375.1 | Symbols: | Metallo-hydrolase/oxidoreductase superfamily protein | chr1:8900279-8903220 REVERSE LENGTH=524	>AT1G25375.1 | Symbols: | Metallo-hydrolase/oxidoreductase superfamily protein | chr1:8900279-8903220 REVERSE LENGTH=524	1	1	1	>AT1G25375.1 | Symbols: | Metallo-hydrolase/oxidoreductase superfamily protein | chr1:8900279-8903220 REVERSE LENGTH=524	1	1	1	1	1	0	0	0	1	0	0	0	1	0	0	0	2.9	2.9	2.9	58.066	524	524	1				0.0052347	2.9	0	0	0	69356000	69356000	0	0	0	69356000	0	0	0	1	0	0	0
>AT1G25380.1 | Symbols: ATNDT2, NDT2 | NAD+ transporter 2 | chr1:8903726-8905818 FORWARD LENGTH=363	>AT1G25380.1 | Symbols: ATNDT2, NDT2 | NAD+ transporter 2 | chr1:8903726-8905818 FORWARD LENGTH=363	1	1	1	>AT1G25380.1 | Symbols: ATNDT2, NDT2 | NAD+ transporter 2 | chr1:8903726-8905818 FORWARD LENGTH=363	1	1	1	1	1	1	1	1	1	1	1	1	1	1	1	1	4.1	4.1	4.1	39.496	363	363	1	1	1	1	2.5672e-13	4.1	4.1	4.1	4.1	118840000	30090000	29463000	37700000	21586000	0	0	0	27118000	1	1	1	0
>AT1G25420.1 | Symbols: | Regulator of Vps4 activity in the MVB pathway protein | chr1:8916141-8917980 FORWARD LENGTH=323;>AT1G25420.3 | Symbols: | Regulator of Vps4 activity in the MVB pathway protein | chr1:8916592-8917980 FORWARD LENGTH=255;>AT1G25420.2 | Symbols: | Regulator of Vps4 activity in the MVB pathway protein | chr1:8916592-8917980 FORWARD LENGTH=255	>AT1G25420.1 | Symbols: | Regulator of Vps4 activity in the MVB pathway protein | chr1:8916141-8917980 FORWARD LENGTH=323;>AT1G25420.3 | Symbols: | Regulator of Vps4 activity in the MVB pathway protein | chr1:8916592-8917980 FORWARD LENGTH=255;>AT1G25420.2 | Symbols: | Regulator of Vps4 activity in the MVB pathway protein | chr1:8916592-8917980 FORWARD LENGTH=255	2;1;1	2;1;1	2;1;1	>AT1G25420.1 | Symbols: | Regulator of Vps4 activity in the MVB pathway protein | chr1:8916141-8917980 FORWARD LENGTH=323;>AT1G25420.3 | Symbols: | Regulator of Vps4 activity in the MVB pathway protein | chr1:8916592-8917980 FORWARD LENGTH=255;>AT1G25420	3	2	2	2	1	1	2	1	1	1	2	1	1	1	2	1	8.4	8.4	8.4	35.813	323	323;255;255	1	1	2	1	8.3314e-10	4.6	4.6	8.4	4.6	88614000	21411000	18144000	30088000	18970000	0	0	33023000	0	0	0	2	1
>AT1G25490.1 | Symbols: RCN1, REGA, ATB BETA BETA, EER1 | ARM repeat superfamily protein | chr1:8951700-8954899 FORWARD LENGTH=588	>AT1G25490.1 | Symbols: RCN1, REGA, ATB BETA BETA, EER1 | ARM repeat superfamily protein | chr1:8951700-8954899 FORWARD LENGTH=588	16	11	11	>AT1G25490.1 | Symbols: RCN1, REGA, ATB BETA BETA, EER1 | ARM repeat superfamily protein | chr1:8951700-8954899 FORWARD LENGTH=588	1	16	11	11	12	11	11	14	9	9	9	10	9	9	9	10	36.4	25.3	25.3	65.493	588	588	12	12	13	13	5.1618e-95	24.8	23	25.2	32.3	7970100000	2522000000	1891100000	1795800000	1761200000	2506200000	2377200000	1795300000	1754300000	12	6	12	14
>AT1G25520.1 | Symbols: | Uncharacterized protein family (UPF0016) | chr1:8962324-8964173 FORWARD LENGTH=230	>AT1G25520.1 | Symbols: | Uncharacterized protein family (UPF0016) | chr1:8962324-8964173 FORWARD LENGTH=230	1	1	1	>AT1G25520.1 | Symbols: | Uncharacterized protein family (UPF0016) | chr1:8962324-8964173 FORWARD LENGTH=230	1	1	1	1	0	1	0	0	0	1	0	0	0	1	0	0	3.9	3.9	3.9	24.808	230	230		1			0.0023192	0	3.9	0	0	90996000	0	90996000	0	0	0	103040000	0	0	0	1	0	0
>AT1G25570.1 | Symbols: | Di-glucose binding protein with Leucine-rich repeat domain | chr1:8992183-8995430 REVERSE LENGTH=628	>AT1G25570.1 | Symbols: | Di-glucose binding protein with Leucine-rich repeat domain | chr1:8992183-8995430 REVERSE LENGTH=628	3	3	3	>AT1G25570.1 | Symbols: | Di-glucose binding protein with Leucine-rich repeat domain | chr1:8992183-8995430 REVERSE LENGTH=628	1	3	3	3	2	2	3	3	2	2	3	3	2	2	3	3	9.4	9.4	9.4	68.971	628	628	2	2	3	3	8.8204e-08	6.1	6.1	9.4	9.4	204940000	31421000	64876000	63583000	45060000	35878000	104700000	50054000	40645000	0	2	1	2
>AT1G26090.1 | Symbols: | P-loop containing nucleoside triphosphate hydrolases superfamily protein | chr1:9020509-9022619 FORWARD LENGTH=455	>AT1G26090.1 | Symbols: | P-loop containing nucleoside triphosphate hydrolases superfamily protein | chr1:9020509-9022619 FORWARD LENGTH=455	1	1	1	>AT1G26090.1 | Symbols: | P-loop containing nucleoside triphosphate hydrolases superfamily protein | chr1:9020509-9022619 FORWARD LENGTH=455	1	1	1	1	1	1	1	0	1	1	1	0	1	1	1	0	3.5	3.5	3.5	49.908	455	455	1	1	1		0.00019074	3.5	3.5	3.5	0	69106000	29114000	17670000	22322000	0	0	0	24499000	0	0	1	0	0
>AT1G26120.1 | Symbols: ICME-LIKE1 | alpha/beta-Hydrolases superfamily protein | chr1:9028656-9031402 REVERSE LENGTH=476	>AT1G26120.1 | Symbols: ICME-LIKE1 | alpha/beta-Hydrolases superfamily protein | chr1:9028656-9031402 REVERSE LENGTH=476	1	1	1	>AT1G26120.1 | Symbols: ICME-LIKE1 | alpha/beta-Hydrolases superfamily protein | chr1:9028656-9031402 REVERSE LENGTH=476	1	1	1	1	0	0	1	1	0	0	1	1	0	0	1	1	2.9	2.9	2.9	52.718	476	476			1	1	0.0010072	0	0	2.9	2.9	19995000	0	0	10317000	9678000	0	0	0	12158000	0	0	1	0
>AT1G26170.1 | Symbols: | ARM repeat superfamily protein | chr1:9047539-9054438 REVERSE LENGTH=1022	>AT1G26170.1 | Symbols: | ARM repeat superfamily protein | chr1:9047539-9054438 REVERSE LENGTH=1022	5	5	5	>AT1G26170.1 | Symbols: | ARM repeat superfamily protein | chr1:9047539-9054438 REVERSE LENGTH=1022	1	5	5	5	2	2	3	2	2	2	3	2	2	2	3	2	6.5	6.5	6.5	113.47	1022	1022	2	2	3	2	1.3991e-14	2.6	2.3	3.9	2.8	185760000	39637000	43492000	71863000	30771000	43383000	0	75127000	0	1	1	2	2
>AT1G26340.1 | Symbols: B5 #6, ATCB5-A, CB5-A | cytochrome B5 isoform A | chr1:9113992-9114755 FORWARD LENGTH=135	>AT1G26340.1 | Symbols: B5 #6, ATCB5-A, CB5-A | cytochrome B5 isoform A | chr1:9113992-9114755 FORWARD LENGTH=135	4	4	4	>AT1G26340.1 | Symbols: B5 #6, ATCB5-A, CB5-A | cytochrome B5 isoform A | chr1:9113992-9114755 FORWARD LENGTH=135	1	4	4	4	3	4	3	3	3	4	3	3	3	4	3	3	49.6	49.6	49.6	15.22	135	135	4	5	6	6	5.0314e-23	31.9	49.6	31.9	31.9	1101000000	239490000	274010000	273340000	314120000	290250000	329250000	247340000	298220000	4	3	4	4
>AT1G26460.1 | Symbols: | Tetratricopeptide repeat (TPR)-like superfamily protein | chr1:9151816-9154407 FORWARD LENGTH=630	>AT1G26460.1 | Symbols: | Tetratricopeptide repeat (TPR)-like superfamily protein | chr1:9151816-9154407 FORWARD LENGTH=630	3	3	3	>AT1G26460.1 | Symbols: | Tetratricopeptide repeat (TPR)-like superfamily protein | chr1:9151816-9154407 FORWARD LENGTH=630	1	3	3	3	2	2	2	2	2	2	2	2	2	2	2	2	7.5	7.5	7.5	70.234	630	630	2	2	2	2	2.2607e-18	5.7	5.7	3.3	3.3	471160000	126860000	88184000	72899000	183210000	126550000	100170000	0	0	2	1	1	2
>AT1G26630.1 | Symbols: FBR12, ATELF5A-2, ELF5A-2 | Eukaryotic translation initiation factor 5A-1 (eIF-5A 1) protein | chr1:9205968-9207098 FORWARD LENGTH=159;>AT1G26630.2 | Symbols: FBR12, ATELF5A-2, ELF5A-2 | Eukaryotic translation initiation factor 5A-1 (eIF-5A 1) protein | chr1:9205968-9207013 FORWARD LENGTH=138	>AT1G26630.1 | Symbols: FBR12, ATELF5A-2, ELF5A-2 | Eukaryotic translation initiation factor 5A-1 (eIF-5A 1) protein | chr1:9205968-9207098 FORWARD LENGTH=159;>AT1G26630.2 | Symbols: FBR12, ATELF5A-2, ELF5A-2 | Eukaryotic translation initiation factor 5A-1 (eIF-5A 1) protein | chr1:9205968-9207013 FORWARD LENGTH=138	8;5	8;5	7;4	>AT1G26630.1 | Symbols: FBR12, ATELF5A-2, ELF5A-2 | Eukaryotic translation initiation factor 5A-1 (eIF-5A 1) protein | chr1:9205968-9207098 FORWARD LENGTH=159;>AT1G26630.2 | Symbols: FBR12, ATELF5A-2, ELF5A-2 | Eukaryotic translation initiation factor 5A-1	2	8	8	7	7	7	6	7	7	7	6	7	6	6	5	6	69.8	69.8	57.9	17.14	159	159;138	11	10	9	10	7.795e-123	53.5	53.5	69.8	69.8	6405800000	2194700000	1347600000	1441100000	1422500000	1609100000	1379100000	1695100000	2360000000	6	5	10	9
>AT1G26640.1 | Symbols: | Amino acid kinase family protein | chr1:9207620-9209766 REVERSE LENGTH=332	>AT1G26640.1 | Symbols: | Amino acid kinase family protein | chr1:9207620-9209766 REVERSE LENGTH=332	1	1	1	>AT1G26640.1 | Symbols: | Amino acid kinase family protein | chr1:9207620-9209766 REVERSE LENGTH=332	1	1	1	1	1	1	1	1	1	1	1	1	1	1	1	1	3.9	3.9	3.9	35.675	332	332	2	1	1	1	0.00044805	3.9	3.9	3.9	3.9	136230000	57942000	29708000	29336000	19241000	0	0	0	24171000	2	1	0	2
>AT1G26690.1 | Symbols: | emp24/gp25L/p24 family/GOLD family protein | chr1:9224299-9225682 REVERSE LENGTH=214	>AT1G26690.1 | Symbols: | emp24/gp25L/p24 family/GOLD family protein | chr1:9224299-9225682 REVERSE LENGTH=214	1	1	1	>AT1G26690.1 | Symbols: | emp24/gp25L/p24 family/GOLD family protein | chr1:9224299-9225682 REVERSE LENGTH=214	1	1	1	1	1	1	1	1	1	1	1	1	1	1	1	1	7.9	7.9	7.9	24.397	214	214	4	2	3	3	2.7391e-12	7.9	7.9	7.9	7.9	722400000	301140000	202650000	125120000	93490000	199000000	185650000	183670000	161920000	2	0	2	1
>AT1G26830.1 | Symbols: CUL3A, ATCUL3A, ATCUL3, CUL3 | cullin 3 | chr1:9296063-9298374 FORWARD LENGTH=732;>AT1G69670.1 | Symbols: CUL3B, ATCUL3B | cullin 3B | chr1:26202169-26204442 REVERSE LENGTH=732	>AT1G26830.1 | Symbols: CUL3A, ATCUL3A, ATCUL3, CUL3 | cullin 3 | chr1:9296063-9298374 FORWARD LENGTH=732	5;2	5;2	5;2	>AT1G26830.1 | Symbols: CUL3A, ATCUL3A, ATCUL3, CUL3 | cullin 3 | chr1:9296063-9298374 FORWARD LENGTH=732	2	5	5	5	3	3	3	4	3	3	3	4	3	3	3	4	7.5	7.5	7.5	85.312	732	732;732	3	3	3	4	2.4167e-14	5.1	4.9	5.1	6.1	568640000	130210000	162100000	170710000	105630000	155290000	188000000	154330000	136190000	3	2	3	4
>AT1G26850.2 | Symbols: | S-adenosyl-L-methionine-dependent methyltransferases superfamily protein | chr1:9301146-9303432 REVERSE LENGTH=616;>AT1G26850.1 | Symbols: | S-adenosyl-L-methionine-dependent methyltransferases superfamily protein | chr1:9301146-9303432 REVERSE LENGTH=616;>AT1G26850.3 | Symbols: | S-adenosyl-L-methionine-dependent methyltransferases superfamily protein | chr1:9301357-930…	>AT1G26850.2 | Symbols: | S-adenosyl-L-methionine-dependent methyltransferases superfamily protein | chr1:9301146-9303432 REVERSE LENGTH=616;>AT1G26850.1 | Symbols: | S-adenosyl-L-methionine-dependent methyltransferases superfamily protein | chr1:9301146-9303432 REVERSE LENGTH=616;>AT1G26850.3 | Symbols: | S-adenosyl-L-methionine-dependent methyltransferases superfamily protein | chr1:9301357-930…	10;10;8	10;10;8	10;10;8	>AT1G26850.2 | Symbols: | S-adenosyl-L-methionine-dependent methyltransferases superfamily protein | chr1:9301146-9303432 REVERSE LENGTH=616;>AT1G26850.1 | Symbols: | S-adenosyl-L-methionine-dependent methyltransferases superfamily protein | chr1:9301146	3	10	10	10	9	7	9	9	9	7	9	9	9	7	9	9	22.1	22.1	22.1	69.622	616	616;616;506	12	10	10	10	1.4476e-65	19	14.9	20.6	20.6	3437400000	1165900000	874610000	631340000	765550000	1055500000	1060300000	863370000	821710000	11	7	10	5
>AT1G26880.1 | Symbols: | Ribosomal protein L34e superfamily protein | chr1:9315640-9316681 REVERSE LENGTH=120;>AT1G26880.2 | Symbols: | Ribosomal protein L34e superfamily protein | chr1:9315798-9316681 REVERSE LENGTH=96	>AT1G26880.1 | Symbols: | Ribosomal protein L34e superfamily protein | chr1:9315640-9316681 REVERSE LENGTH=120;>AT1G26880.2 | Symbols: | Ribosomal protein L34e superfamily protein | chr1:9315798-9316681 REVERSE LENGTH=96	3;2	3;2	1;1	>AT1G26880.1 | Symbols: | Ribosomal protein L34e superfamily protein | chr1:9315640-9316681 REVERSE LENGTH=120;>AT1G26880.2 | Symbols: | Ribosomal protein L34e superfamily protein | chr1:9315798-9316681 REVERSE LENGTH=96	2	3	3	1	3	3	2	3	3	3	2	3	1	1	0	1	27.5	27.5	10.8	13.705	120	120;96	3	3	2	3	4.8437e-17	27.5	27.5	16.7	27.5	13211000000	4218500000	5032800000	1891100000	2068700000	4248700000	5693000000	1890900000	2759100000	3	2	3	4
>AT1G26940.1 | Symbols: | Cyclophilin-like peptidyl-prolyl cis-trans isomerase family protein | chr1:9343193-9344962 FORWARD LENGTH=226	>AT1G26940.1 | Symbols: | Cyclophilin-like peptidyl-prolyl cis-trans isomerase family protein | chr1:9343193-9344962 FORWARD LENGTH=226	1	1	1	>AT1G26940.1 | Symbols: | Cyclophilin-like peptidyl-prolyl cis-trans isomerase family protein | chr1:9343193-9344962 FORWARD LENGTH=226	1	1	1	1	0	1	0	0	0	1	0	0	0	1	0	0	10.2	10.2	10.2	25.515	226	226		1			6.161e-08	0	10.2	0	0	11595000	0	11595000	0	0	0	13130000	0	0	0	1	0	0
>AT1G27020.1 | Symbols: | unknown protein; BEST Arabidopsis thaliana protein match is: unknown protein (TAIR:AT1G27030.1); Has 514 Blast hits to 514 proteins in 175 species: Archae - 0; Bacteria - 311; Metazoa - 0; Fungi - 0; Plants - 65; Viruses - 0; Other Eukaryotes - 138 (source: NCBI BLink). | chr1:9378635-9380419 FORWARD LENGTH=308	>AT1G27020.1 | Symbols: | unknown protein; BEST Arabidopsis thaliana protein match is: unknown protein (TAIR:AT1G27030.1); Has 514 Blast hits to 514 proteins in 175 species: Archae - 0; Bacteria - 311; Metazoa - 0; Fungi - 0; Plants - 65; Viruses - 0; Other Eukaryotes - 138 (source: NCBI BLink). | chr1:9378635-9380419 FORWARD LENGTH=308	5	5	5	>AT1G27020.1 | Symbols: | unknown protein; BEST Arabidopsis thaliana protein match is: unknown protein (TAIR:AT1G27030.1); Has 514 Blast hits to 514 proteins in 175 species: Archae - 0; Bacteria - 311; Metazoa - 0; Fungi - 0; Plants - 65; Viruses - 0; Oth	1	5	5	5	1	3	5	3	1	3	5	3	1	3	5	3	26	26	26	35.079	308	308	1	4	6	3	3.791e-20	5.2	15.6	26	16.9	508240000	38512000	104690000	251460000	113580000	0	98933000	247030000	191250000	1	2	5	3
>AT1G27030.1 | Symbols: | unknown protein; BEST Arabidopsis thaliana protein match is: unknown protein (TAIR:AT1G27020.1); Has 504 Blast hits to 502 proteins in 169 species: Archae - 0; Bacteria - 299; Metazoa - 0; Fungi - 0; Plants - 67; Viruses - 0; Other Eukaryotes - 138 (source: NCBI BLink). | chr1:9381842-9383712 FORWARD LENGTH=310	>AT1G27030.1 | Symbols: | unknown protein; BEST Arabidopsis thaliana protein match is: unknown protein (TAIR:AT1G27020.1); Has 504 Blast hits to 502 proteins in 169 species: Archae - 0; Bacteria - 299; Metazoa - 0; Fungi - 0; Plants - 67; Viruses - 0; Other Eukaryotes - 138 (source: NCBI BLink). | chr1:9381842-9383712 FORWARD LENGTH=310	13	13	13	>AT1G27030.1 | Symbols: | unknown protein; BEST Arabidopsis thaliana protein match is: unknown protein (TAIR:AT1G27020.1); Has 504 Blast hits to 502 proteins in 169 species: Archae - 0; Bacteria - 299; Metazoa - 0; Fungi - 0; Plants - 67; Viruses - 0; Oth	1	13	13	13	12	11	11	12	12	11	11	12	12	11	11	12	49.4	49.4	49.4	35.52	310	310	16	13	14	16	2.1701e-130	46.8	42.9	45.5	49.4	7072100000	1827400000	1691900000	1604000000	1948900000	1756100000	1805900000	1856000000	2394400000	13	10	13	15
>AT1G27090.1 | Symbols: | glycine-rich protein | chr1:9404041-9406098 REVERSE LENGTH=420	>AT1G27090.1 | Symbols: | glycine-rich protein | chr1:9404041-9406098 REVERSE LENGTH=420	7	7	7	>AT1G27090.1 | Symbols: | glycine-rich protein | chr1:9404041-9406098 REVERSE LENGTH=420	1	7	7	7	5	5	4	6	5	5	4	6	5	5	4	6	26	26	26	46.018	420	420	5	5	4	7	2.3139e-52	16.7	17.1	15	21.9	1502300000	451900000	405720000	199990000	444660000	403990000	421630000	343430000	391120000	2	5	3	5
>AT1G27130.1 | Symbols: ATGSTU13, GST12, GSTU13 | glutathione S-transferase tau 13 | chr1:9425582-9426597 FORWARD LENGTH=227;>AT1G27140.1 | Symbols: ATGSTU14, GST13, GSTU14 | glutathione S-transferase tau 14 | chr1:9427858-9428716 FORWARD LENGTH=243	>AT1G27130.1 | Symbols: ATGSTU13, GST12, GSTU13 | glutathione S-transferase tau 13 | chr1:9425582-9426597 FORWARD LENGTH=227	6;1	6;1	6;1	>AT1G27130.1 | Symbols: ATGSTU13, GST12, GSTU13 | glutathione S-transferase tau 13 | chr1:9425582-9426597 FORWARD LENGTH=227	2	6	6	6	3	6	6	5	3	6	6	5	3	6	6	5	33	33	33	25.131	227	227;243	4	7	7	7	5.3834e-21	18.1	33	33	28.2	2118200000	120260000	585750000	760430000	651790000	358400000	360390000	628440000	1089700000	1	3	7	5
>AT1G27150.1 | Symbols: | Tetratricopeptide repeat (TPR)-like superfamily protein | chr1:9429177-9432068 FORWARD LENGTH=468	>AT1G27150.1 | Symbols: | Tetratricopeptide repeat (TPR)-like superfamily protein | chr1:9429177-9432068 FORWARD LENGTH=468	2	2	2	>AT1G27150.1 | Symbols: | Tetratricopeptide repeat (TPR)-like superfamily protein | chr1:9429177-9432068 FORWARD LENGTH=468	1	2	2	2	2	2	1	2	2	2	1	2	2	2	1	2	7.5	7.5	7.5	53.589	468	468	2	2	1	2	1.316e-06	7.5	7.5	3.2	7.5	178810000	32997000	47135000	33419000	65259000	0	54036000	0	81318000	2	2	1	1
>AT1G27190.1 | Symbols: | Leucine-rich repeat protein kinase family protein | chr1:9446923-9448728 REVERSE LENGTH=601	>AT1G27190.1 | Symbols: | Leucine-rich repeat protein kinase family protein | chr1:9446923-9448728 REVERSE LENGTH=601	4	4	4	>AT1G27190.1 | Symbols: | Leucine-rich repeat protein kinase family protein | chr1:9446923-9448728 REVERSE LENGTH=601	1	4	4	4	2	3	3	3	2	3	3	3	2	3	3	3	10.3	10.3	10.3	65.423	601	601	2	3	4	3	2.5636e-70	6.3	8.2	7	8.2	564490000	177920000	130710000	125800000	130060000	130740000	158520000	145500000	168390000	1	2	2	2
>AT1G27310.1 | Symbols: NTF2A | nuclear transport factor 2A | chr1:9484615-9485790 REVERSE LENGTH=122	>AT1G27310.1 | Symbols: NTF2A | nuclear transport factor 2A | chr1:9484615-9485790 REVERSE LENGTH=122	1	1	1	>AT1G27310.1 | Symbols: NTF2A | nuclear transport factor 2A | chr1:9484615-9485790 REVERSE LENGTH=122	1	1	1	1	1	1	1	1	1	1	1	1	1	1	1	1	8.2	8.2	8.2	13.527	122	122	1	1	1	1	0.00071146	8.2	8.2	8.2	8.2	2211500000	834740000	728220000	327120000	321400000	0	0	0	403760000	0	0	1	1
>AT1G27390.1 | Symbols: TOM20-2 | translocase outer membrane 20-2 | chr1:9513469-9514912 REVERSE LENGTH=210	>AT1G27390.1 | Symbols: TOM20-2 | translocase outer membrane 20-2 | chr1:9513469-9514912 REVERSE LENGTH=210	4	4	4	>AT1G27390.1 | Symbols: TOM20-2 | translocase outer membrane 20-2 | chr1:9513469-9514912 REVERSE LENGTH=210	1	4	4	4	3	4	2	3	3	4	2	3	3	4	2	3	22.4	22.4	22.4	23.17	210	210	3	4	2	3	5.4476e-16	17.1	22.4	12.9	17.1	1392200000	359790000	465230000	251260000	315950000	365620000	489800000	351320000	352530000	1	2	2	2
>AT1G27400.1 | Symbols: | Ribosomal protein L22p/L17e family protein | chr1:9515230-9516725 FORWARD LENGTH=176;>AT1G67430.1 | Symbols: | Ribosomal protein L22p/L17e family protein | chr1:25262209-25263627 FORWARD LENGTH=175;>AT1G67430.2 | Symbols: | Ribosomal protein L22p/L17e family protein | chr1:25262209-25263627 FORWARD LENGTH=131	>AT1G27400.1 | Symbols: | Ribosomal protein L22p/L17e family protein | chr1:9515230-9516725 FORWARD LENGTH=176;>AT1G67430.1 | Symbols: | Ribosomal protein L22p/L17e family protein | chr1:25262209-25263627 FORWARD LENGTH=175;>AT1G67430.2 | Symbols: | Ribosomal protein L22p/L17e family protein | chr1:25262209-25263627 FORWARD LENGTH=131	10;9;6	10;9;6	10;9;6	>AT1G27400.1 | Symbols: | Ribosomal protein L22p/L17e family protein | chr1:9515230-9516725 FORWARD LENGTH=176;>AT1G67430.1 | Symbols: | Ribosomal protein L22p/L17e family protein | chr1:25262209-25263627 FORWARD LENGTH=175;>AT1G67430.2 | Symbols: | Rib	3	10	10	10	9	9	10	10	9	9	10	10	9	9	10	10	59.7	59.7	59.7	19.897	176	176;175;131	13	12	17	14	1.7502e-44	49.4	49.4	59.7	59.7	22003000000	5835000000	3944100000	6748100000	5475800000	6236700000	4607500000	7143500000	6462000000	14	6	16	12
>AT1G27450.2 | Symbols: APT1, ATAPT1 | adenine phosphoribosyl transferase 1 | chr1:9532421-9533807 FORWARD LENGTH=183;>AT1G27450.1 | Symbols: APT1, ATAPT1 | adenine phosphoribosyl transferase 1 | chr1:9532042-9533807 FORWARD LENGTH=243;>AT1G27450.3 | Symbols: APT1 | adenine phosphoribosyl transferase 1 | chr1:9532042-9533807 FORWARD LENGTH=284	>AT1G27450.2 | Symbols: APT1, ATAPT1 | adenine phosphoribosyl transferase 1 | chr1:9532421-9533807 FORWARD LENGTH=183;>AT1G27450.1 | Symbols: APT1, ATAPT1 | adenine phosphoribosyl transferase 1 | chr1:9532042-9533807 FORWARD LENGTH=243;>AT1G27450.3 | Symbols: APT1 | adenine phosphoribosyl transferase 1 | chr1:9532042-9533807 FORWARD LENGTH=284	5;5;5	5;5;5	5;5;5	>AT1G27450.2 | Symbols: APT1, ATAPT1 | adenine phosphoribosyl transferase 1 | chr1:9532421-9533807 FORWARD LENGTH=183;>AT1G27450.1 | Symbols: APT1, ATAPT1 | adenine phosphoribosyl transferase 1 | chr1:9532042-9533807 FORWARD LENGTH=243;>AT1G27450.3 | Symbo	3	5	5	5	2	2	4	3	2	2	4	3	2	2	4	3	43.7	43.7	43.7	19.739	183	183;243;284	5	2	9	7	6.9038e-37	16.4	16.4	37.7	23	1702700000	128490000	29399000	778710000	766120000	206250000	0	568240000	985120000	2	0	9	8
>AT1G27530.1 | Symbols: | CONTAINS InterPro DOMAIN/s: Ubiquitin-conjugating enzyme/RWD-like (InterPro:IPR016135), Ubiquitin-fold modifier-conjugating enzyme 1 (InterPro:IPR014806); Has 269 Blast hits to 269 proteins in 110 species: Archae - 0; Bacteria - 0; Metazoa - 175; Fungi - 0; Plants - 42; Viruses - 0; Other Eukaryotes - 52 (source: NCBI BLink). | chr1:9562761-9563887 REVERSE LENGTH=174	>AT1G27530.1 | Symbols: | CONTAINS InterPro DOMAIN/s: Ubiquitin-conjugating enzyme/RWD-like (InterPro:IPR016135), Ubiquitin-fold modifier-conjugating enzyme 1 (InterPro:IPR014806); Has 269 Blast hits to 269 proteins in 110 species: Archae - 0; Bacteria - 0; Metazoa - 175; Fungi - 0; Plants - 42; Viruses - 0; Other Eukaryotes - 52 (source: NCBI BLink). | chr1:9562761-9563887 REVERSE LENGTH=174	1	1	1	>AT1G27530.1 | Symbols: | CONTAINS InterPro DOMAIN/s: Ubiquitin-conjugating enzyme/RWD-like (InterPro:IPR016135), Ubiquitin-fold modifier-conjugating enzyme 1 (InterPro:IPR014806); Has 269 Blast hits to 269 proteins in 110 species: Archae - 0; Bacteria -	1	1	1	1	1	0	1	1	1	0	1	1	1	0	1	1	5.7	5.7	5.7	19.611	174	174	1		1	1	7.8933e-07	5.7	0	5.7	5.7	135880000	78245000	0	37252000	20384000	0	0	0	25607000	1	0	1	0
>AT1G27580.1 | Symbols: | Protein of unknown function (DUF295) | chr1:9589933-9591075 REVERSE LENGTH=364;>AT1G27540.2 | Symbols: | Protein of unknown function (DUF295) | chr1:9566608-9567849 REVERSE LENGTH=383;>AT1G27540.1 | Symbols: | Protein of unknown function (DUF295) | chr1:9566608-9567849 REVERSE LENGTH=413	>AT1G27580.1 | Symbols: | Protein of unknown function (DUF295) | chr1:9589933-9591075 REVERSE LENGTH=364;>AT1G27540.2 | Symbols: | Protein of unknown function (DUF295) | chr1:9566608-9567849 REVERSE LENGTH=383;>AT1G27540.1 | Symbols: | Protein of unknown function (DUF295) | chr1:9566608-9567849 REVERSE LENGTH=413	2;2;2	2;2;2	2;2;2	>AT1G27580.1 | Symbols: | Protein of unknown function (DUF295) | chr1:9589933-9591075 REVERSE LENGTH=364;>AT1G27540.2 | Symbols: | Protein of unknown function (DUF295) | chr1:9566608-9567849 REVERSE LENGTH=383;>AT1G27540.1 | Symbols: | Protein of unknow	3	2	2	2	2	1	0	0	2	1	0	0	2	1	0	0	5.5	5.5	5.5	42.463	364	364;383;413	2	1			2.0897e-09	5.5	2.7	0	0	69127000	31339000	37788000	0	0	0	42789000	0	0	1	1	0	0
>AT1G27650.1 | Symbols: ATU2AF35A | U2 snRNP auxiliary factor small subunit, putative | chr1:9615152-9616042 FORWARD LENGTH=296;>AT1G27650.2 | Symbols: ATU2AF35A | U2 snRNP auxiliary factor small subunit, putative | chr1:9615302-9616042 FORWARD LENGTH=246;>AT5G42820.2 | Symbols: ATU2AF35B, U2AF35B | Zinc finger C-x8-C-x5-C-x3-H type family protein | chr5:17170445-17171296 REVERSE LENGTH=283;>AT5G…	>AT1G27650.1 | Symbols: ATU2AF35A | U2 snRNP auxiliary factor small subunit, putative | chr1:9615152-9616042 FORWARD LENGTH=296;>AT1G27650.2 | Symbols: ATU2AF35A | U2 snRNP auxiliary factor small subunit, putative | chr1:9615302-9616042 FORWARD LENGTH=246;>AT5G42820.2 | Symbols: ATU2AF35B, U2AF35B | Zinc finger C-x8-C-x5-C-x3-H type family protein | chr5:17170445-17171296 REVERSE LENGTH=283;>AT5G…	3;2;2;2	3;2;2;2	3;2;2;2	>AT1G27650.1 | Symbols: ATU2AF35A | U2 snRNP auxiliary factor small subunit, putative | chr1:9615152-9616042 FORWARD LENGTH=296;>AT1G27650.2 | Symbols: ATU2AF35A | U2 snRNP auxiliary factor small subunit, putative | chr1:9615302-9616042 FORWARD LENGTH=246;	4	3	3	3	2	1	2	3	2	1	2	3	2	1	2	3	13.5	13.5	13.5	34.572	296	296;246;283;283	2	1	3	3	2.1934e-16	9.1	4.1	8.4	13.5	222480000	81034000	38115000	74740000	28593000	81034000	0	0	0	1	1	1	1
>AT1G27770.2 | Symbols: ACA1, PEA1 | autoinhibited Ca2+-ATPase 1 | chr1:9671912-9676010 REVERSE LENGTH=946;>AT1G27770.1 | Symbols: ACA1, PEA1 | autoinhibited Ca2+-ATPase 1 | chr1:9671912-9676010 REVERSE LENGTH=1020	>AT1G27770.2 | Symbols: ACA1, PEA1 | autoinhibited Ca2+-ATPase 1 | chr1:9671912-9676010 REVERSE LENGTH=946;>AT1G27770.1 | Symbols: ACA1, PEA1 | autoinhibited Ca2+-ATPase 1 | chr1:9671912-9676010 REVERSE LENGTH=1020	8;8	8;8	7;7	>AT1G27770.2 | Symbols: ACA1, PEA1 | autoinhibited Ca2+-ATPase 1 | chr1:9671912-9676010 REVERSE LENGTH=946;>AT1G27770.1 | Symbols: ACA1, PEA1 | autoinhibited Ca2+-ATPase 1 | chr1:9671912-9676010 REVERSE LENGTH=1020	2	8	8	7	6	6	5	5	6	6	5	5	5	5	4	4	8.8	8.8	7.4	103.72	946	946;1020	7	7	5	5	3.2459e-54	7	6.9	6.4	6	1642900000	653280000	488850000	311940000	188790000	493390000	490980000	338900000	373150000	6	3	4	3
>AT1G27900.1 | Symbols: | RNA helicase family protein | chr1:9715615-9720346 REVERSE LENGTH=700	>AT1G27900.1 | Symbols: | RNA helicase family protein | chr1:9715615-9720346 REVERSE LENGTH=700	4	4	4	>AT1G27900.1 | Symbols: | RNA helicase family protein | chr1:9715615-9720346 REVERSE LENGTH=700	1	4	4	4	4	4	0	3	4	4	0	3	4	4	0	3	7.7	7.7	7.7	78.369	700	700	4	4		3	1.5882e-11	7.7	7.7	0	6.1	253730000	121080000	77174000	0	55482000	110260000	91901000	0	76002000	3	2	0	2
>AT1G27930.1 | Symbols: | Protein of unknown function (DUF579) | chr1:9731510-9732379 REVERSE LENGTH=289	>AT1G27930.1 | Symbols: | Protein of unknown function (DUF579) | chr1:9731510-9732379 REVERSE LENGTH=289	3	3	3	>AT1G27930.1 | Symbols: | Protein of unknown function (DUF579) | chr1:9731510-9732379 REVERSE LENGTH=289	1	3	3	3	2	2	1	2	2	2	1	2	2	2	1	2	12.1	12.1	12.1	32.356	289	289	2	2	1	2	2.3473e-12	7.6	7.6	4.5	7.6	373790000	145410000	126680000	5488900	96217000	121250000	156000000	0	132470000	1	2	1	1
>AT1G27970.1 | Symbols: NTF2B | nuclear transport factor 2B | chr1:9746921-9747787 FORWARD LENGTH=126;>AT1G27970.2 | Symbols: NTF2B | nuclear transport factor 2B | chr1:9746921-9748306 FORWARD LENGTH=134	>AT1G27970.1 | Symbols: NTF2B | nuclear transport factor 2B | chr1:9746921-9747787 FORWARD LENGTH=126;>AT1G27970.2 | Symbols: NTF2B | nuclear transport factor 2B | chr1:9746921-9748306 FORWARD LENGTH=134	4;4	4;4	4;4	>AT1G27970.1 | Symbols: NTF2B | nuclear transport factor 2B | chr1:9746921-9747787 FORWARD LENGTH=126;>AT1G27970.2 | Symbols: NTF2B | nuclear transport factor 2B | chr1:9746921-9748306 FORWARD LENGTH=134	2	4	4	4	3	3	4	3	3	3	4	3	3	3	4	3	42.1	42.1	42.1	14.002	126	126;134	4	3	4	4	2.7292e-16	31	31	42.1	31	2927200000	857130000	646840000	840510000	582760000	750290000	502000000	1230900000	644650000	2	0	4	3
>AT1G27980.1 | Symbols: DPL1, ATDPL1 | dihydrosphingosine phosphate lyase | chr1:9748812-9752618 FORWARD LENGTH=544	>AT1G27980.1 | Symbols: DPL1, ATDPL1 | dihydrosphingosine phosphate lyase | chr1:9748812-9752618 FORWARD LENGTH=544	5	5	5	>AT1G27980.1 | Symbols: DPL1, ATDPL1 | dihydrosphingosine phosphate lyase | chr1:9748812-9752618 FORWARD LENGTH=544	1	5	5	5	4	4	4	3	4	4	4	3	4	4	4	3	12.1	12.1	12.1	59.477	544	544	4	4	4	3	6.5016e-19	9.2	10.5	10.5	7.5	1045300000	393340000	242160000	208480000	201360000	356690000	203410000	276530000	312690000	3	3	2	1
>AT1G28110.2 | Symbols: SCPL45 | serine carboxypeptidase-like 45 | chr1:9804153-9806832 REVERSE LENGTH=461;>AT1G28110.1 | Symbols: SCPL45 | serine carboxypeptidase-like 45 | chr1:9804153-9806832 REVERSE LENGTH=461	>AT1G28110.2 | Symbols: SCPL45 | serine carboxypeptidase-like 45 | chr1:9804153-9806832 REVERSE LENGTH=461;>AT1G28110.1 | Symbols: SCPL45 | serine carboxypeptidase-like 45 | chr1:9804153-9806832 REVERSE LENGTH=461	3;3	3;3	3;3	>AT1G28110.2 | Symbols: SCPL45 | serine carboxypeptidase-like 45 | chr1:9804153-9806832 REVERSE LENGTH=461;>AT1G28110.1 | Symbols: SCPL45 | serine carboxypeptidase-like 45 | chr1:9804153-9806832 REVERSE LENGTH=461	2	3	3	3	3	2	2	2	3	2	2	2	3	2	2	2	11.5	11.5	11.5	51.802	461	461;461	3	2	2	2	3.5349e-17	11.5	8.7	6.7	6.7	314370000	111250000	69948000	85486000	47691000	65328000	83102000	119450000	76303000	2	2	1	2
>AT1G28120.1 | Symbols: | CONTAINS InterPro DOMAIN/s: Ovarian tumour, otubain (InterPro:IPR003323), Ubiquitin thioesterase Otubain (InterPro:IPR016615), Peptidase C65, otubain (InterPro:IPR019400); Has 413 Blast hits to 411 proteins in 139 species: Archae - 0; Bacteria - 0; Metazoa - 184; Fungi - 83; Plants - 88; Viruses - 0; Other Eukaryotes - 58 (source: NCBI BLink). | chr1:9813219-9815143 REVE…	>AT1G28120.1 | Symbols: | CONTAINS InterPro DOMAIN/s: Ovarian tumour, otubain (InterPro:IPR003323), Ubiquitin thioesterase Otubain (InterPro:IPR016615), Peptidase C65, otubain (InterPro:IPR019400); Has 413 Blast hits to 411 proteins in 139 species: Archae - 0; Bacteria - 0; Metazoa - 184; Fungi - 83; Plants - 88; Viruses - 0; Other Eukaryotes - 58 (source: NCBI BLink). | chr1:9813219-9815143 REVE…	2	2	2	>AT1G28120.1 | Symbols: | CONTAINS InterPro DOMAIN/s: Ovarian tumour, otubain (InterPro:IPR003323), Ubiquitin thioesterase Otubain (InterPro:IPR016615), Peptidase C65, otubain (InterPro:IPR019400); Has 413 Blast hits to 411 proteins in 139 species: Archae	1	2	2	2	1	1	0	2	1	1	0	2	1	1	0	2	10.1	10.1	10.1	34.434	306	306	1	1		2	7.6938e-06	3.3	3.3	0	10.1	79423000	31677000	28058000	0	19688000	0	0	0	24733000	0	1	0	1
>AT1G28130.1 | Symbols: GH3.17 | Auxin-responsive GH3 family protein | chr1:9825431-9827883 FORWARD LENGTH=609;>AT1G28130.2 | Symbols: GH3.17 | Auxin-responsive GH3 family protein | chr1:9826379-9827883 FORWARD LENGTH=466;>AT2G23170.1 | Symbols: GH3.3 | Auxin-responsive GH3 family protein | chr2:9864125-9866502 REVERSE LENGTH=595;>AT4G37390.1 | Symbols: YDK1, GH3.2, BRU6, GH3-2, AUR3 | Auxin-resp…	>AT1G28130.1 | Symbols: GH3.17 | Auxin-responsive GH3 family protein | chr1:9825431-9827883 FORWARD LENGTH=609;>AT1G28130.2 | Symbols: GH3.17 | Auxin-responsive GH3 family protein | chr1:9826379-9827883 FORWARD LENGTH=466	16;9;2;2;1;1;1;1	16;9;2;2;1;1;1;1	16;9;2;2;1;1;1;1	>AT1G28130.1 | Symbols: GH3.17 | Auxin-responsive GH3 family protein | chr1:9825431-9827883 FORWARD LENGTH=609;>AT1G28130.2 | Symbols: GH3.17 | Auxin-responsive GH3 family protein | chr1:9826379-9827883 FORWARD LENGTH=466	8	16	16	16	11	8	15	14	11	8	15	14	11	8	15	14	40.4	40.4	40.4	68.863	609	609;466;595;603;590;597;612;612	15	11	18	19	2.4031e-124	28.4	24.3	37.9	34	6395700000	1676900000	1383200000	1815700000	1519900000	1579800000	1712400000	1805700000	1713000000	9	9	14	14
>AT1G28290.2 | Symbols: AGP31 | arabinogalactan protein 31 | chr1:9889331-9890843 REVERSE LENGTH=315;>AT1G28290.1 | Symbols: AGP31 | arabinogalactan protein 31 | chr1:9889331-9890843 REVERSE LENGTH=359	>AT1G28290.2 | Symbols: AGP31 | arabinogalactan protein 31 | chr1:9889331-9890843 REVERSE LENGTH=315;>AT1G28290.1 | Symbols: AGP31 | arabinogalactan protein 31 | chr1:9889331-9890843 REVERSE LENGTH=359	6;6	6;6	6;6	>AT1G28290.2 | Symbols: AGP31 | arabinogalactan protein 31 | chr1:9889331-9890843 REVERSE LENGTH=315;>AT1G28290.1 | Symbols: AGP31 | arabinogalactan protein 31 | chr1:9889331-9890843 REVERSE LENGTH=359	2	6	6	6	5	6	6	6	5	6	6	6	5	6	6	6	16.5	16.5	16.5	33.932	315	315;359	6	7	6	6	4.0251e-18	13.3	16.5	16.5	16.5	9852800000	3180900000	2843200000	2061100000	1767600000	3349200000	3017700000	2251400000	2264700000	7	9	9	9
>AT1G28330.1 | Symbols: DRM1, DYL1 | dormancy-associated protein-like 1 | chr1:9934252-9935216 REVERSE LENGTH=122;>AT1G28330.4 | Symbols: | dormancy-associated protein-like 1 | chr1:9934134-9935216 REVERSE LENGTH=125;>AT1G28330.3 | Symbols: DYL1 | dormancy-associated protein-like 1 | chr1:9934500-9935216 REVERSE LENGTH=132;>AT1G28330.2 | Symbols: DYL1 | dormancy-associated protein-like 1 | chr1:9…	>AT1G28330.1 | Symbols: DRM1, DYL1 | dormancy-associated protein-like 1 | chr1:9934252-9935216 REVERSE LENGTH=122;>AT1G28330.4 | Symbols: | dormancy-associated protein-like 1 | chr1:9934134-9935216 REVERSE LENGTH=125;>AT1G28330.3 | Symbols: DYL1 | dormancy-associated protein-like 1 | chr1:9934500-9935216 REVERSE LENGTH=132;>AT1G28330.2 | Symbols: DYL1 | dormancy-associated protein-like 1 | chr1:9…	1;1;1;1;1	1;1;1;1;1	1;1;1;1;1	>AT1G28330.1 | Symbols: DRM1, DYL1 | dormancy-associated protein-like 1 | chr1:9934252-9935216 REVERSE LENGTH=122;>AT1G28330.4 | Symbols: | dormancy-associated protein-like 1 | chr1:9934134-9935216 REVERSE LENGTH=125;>AT1G28330.3 | Symbols: DYL1 | dormanc	5	1	1	1	1	1	0	0	1	1	0	0	1	1	0	0	10.7	10.7	10.7	13.406	122	122;125;132;132;159	2	1			3.208e-05	10.7	10.7	0	0	55320000	30246000	25073000	0	0	0	28391000	0	0	0	1	0	0
>AT1G28340.1 | Symbols: AtRLP4, RLP4 | receptor like protein 4 | chr1:9940175-9943252 FORWARD LENGTH=626	>AT1G28340.1 | Symbols: AtRLP4, RLP4 | receptor like protein 4 | chr1:9940175-9943252 FORWARD LENGTH=626	1	1	1	>AT1G28340.1 | Symbols: AtRLP4, RLP4 | receptor like protein 4 | chr1:9940175-9943252 FORWARD LENGTH=626	1	1	1	1	0	0	1	0	0	0	1	0	0	0	1	0	2.4	2.4	2.4	68.418	626	626			1		6.3133e-05	0	0	2.4	0	0	0	0	0	0	0	0	0	0	0	0	0	0
>AT1G28350.1 | Symbols: | Nucleotidylyl transferase superfamily protein | chr1:9944483-9949577 FORWARD LENGTH=748	>AT1G28350.1 | Symbols: | Nucleotidylyl transferase superfamily protein | chr1:9944483-9949577 FORWARD LENGTH=748	4	4	3	>AT1G28350.1 | Symbols: | Nucleotidylyl transferase superfamily protein | chr1:9944483-9949577 FORWARD LENGTH=748	1	4	4	3	3	2	4	4	3	2	4	4	2	2	3	3	6.8	6.8	5.5	84.717	748	748	3	2	4	4	7.7279e-12	4.9	3.6	6.8	6.8	298020000	62693000	47476000	110560000	77291000	72117000	86161000	97258000	79355000	1	2	2	2
>AT1G28510.1 | Symbols: | Optic atrophy 3 protein (OPA3) | chr1:10024036-10025939 FORWARD LENGTH=171	>AT1G28510.1 | Symbols: | Optic atrophy 3 protein (OPA3) | chr1:10024036-10025939 FORWARD LENGTH=171	2	2	2	>AT1G28510.1 | Symbols: | Optic atrophy 3 protein (OPA3) | chr1:10024036-10025939 FORWARD LENGTH=171	1	2	2	2	1	0	1	2	1	0	1	2	1	0	1	2	14.6	14.6	14.6	19.179	171	171	1		1	2	0.0011499	9.9	0	9.9	14.6	61129000	24237000	0	21063000	15829000	0	0	0	19885000	0	0	1	0
>AT1G28580.1 | Symbols: | GDSL-like Lipase/Acylhydrolase superfamily protein | chr1:10044603-10046379 REVERSE LENGTH=390;>AT1G28580.2 | Symbols: | GDSL-like Lipase/Acylhydrolase superfamily protein | chr1:10044603-10045874 REVERSE LENGTH=309	>AT1G28580.1 | Symbols: | GDSL-like Lipase/Acylhydrolase superfamily protein | chr1:10044603-10046379 REVERSE LENGTH=390;>AT1G28580.2 | Symbols: | GDSL-like Lipase/Acylhydrolase superfamily protein | chr1:10044603-10045874 REVERSE LENGTH=309	2;1	2;1	2;1	>AT1G28580.1 | Symbols: | GDSL-like Lipase/Acylhydrolase superfamily protein | chr1:10044603-10046379 REVERSE LENGTH=390;>AT1G28580.2 | Symbols: | GDSL-like Lipase/Acylhydrolase superfamily protein | chr1:10044603-10045874 REVERSE LENGTH=309	2	2	2	2	2	2	2	2	2	2	2	2	2	2	2	2	8.2	8.2	8.2	43.025	390	390;309	2	3	3	3	1.7742e-09	8.2	8.2	8.2	8.2	836410000	96645000	444020000	124280000	171470000	158370000	501500000	112880000	178470000	1	3	1	0
>AT1G28680.1 | Symbols: | HXXXD-type acyl-transferase family protein | chr1:10078222-10079763 FORWARD LENGTH=451	>AT1G28680.1 | Symbols: | HXXXD-type acyl-transferase family protein | chr1:10078222-10079763 FORWARD LENGTH=451	6	6	6	>AT1G28680.1 | Symbols: | HXXXD-type acyl-transferase family protein | chr1:10078222-10079763 FORWARD LENGTH=451	1	6	6	6	4	4	6	5	4	4	6	5	4	4	6	5	18.6	18.6	18.6	49.679	451	451	6	5	7	7	1.0944e-23	10.6	10.6	18.6	16.9	1588200000	483160000	379980000	363380000	361690000	428900000	451680000	442080000	443970000	4	4	6	5
>AT1G28960.4 | Symbols: ATNUDT15, ATNUDX15, NUDX15 | nudix hydrolase homolog 15 | chr1:10110020-10111607 REVERSE LENGTH=285;>AT1G28960.2 | Symbols: ATNUDT15, ATNUDX15, NUDX15 | nudix hydrolase homolog 15 | chr1:10110020-10111607 REVERSE LENGTH=285;>AT1G28960.5 | Symbols: ATNUDT15, ATNUDX15, NUDX15 | nudix hydrolase homolog 15 | chr1:10110135-10111607 REVERSE LENGTH=293;>AT1G28960.3 | Symbols: ATN…	>AT1G28960.4 | Symbols: ATNUDT15, ATNUDX15, NUDX15 | nudix hydrolase homolog 15 | chr1:10110020-10111607 REVERSE LENGTH=285;>AT1G28960.2 | Symbols: ATNUDT15, ATNUDX15, NUDX15 | nudix hydrolase homolog 15 | chr1:10110020-10111607 REVERSE LENGTH=285;>AT1G28960.5 | Symbols: ATNUDT15, ATNUDX15, NUDX15 | nudix hydrolase homolog 15 | chr1:10110135-10111607 REVERSE LENGTH=293;>AT1G28960.3 | Symbols: ATN…	1;1;1;1;1	1;1;1;1;1	1;1;1;1;1	>AT1G28960.4 | Symbols: ATNUDT15, ATNUDX15, NUDX15 | nudix hydrolase homolog 15 | chr1:10110020-10111607 REVERSE LENGTH=285;>AT1G28960.2 | Symbols: ATNUDT15, ATNUDX15, NUDX15 | nudix hydrolase homolog 15 | chr1:10110020-10111607 REVERSE LENGTH=285;>AT1G289	5	1	1	1	0	1	0	1	0	1	0	1	0	1	0	1	8.8	8.8	8.8	31.898	285	285;285;293;293;293		1		1	1.9912e-05	0	8.8	0	8.8	38965000	0	23901000	0	15064000	0	0	0	18924000	0	1	0	0
>AT1G29030.1 | Symbols: | Apoptosis inhibitory protein 5 (API5) | chr1:10129201-10133697 REVERSE LENGTH=556	>AT1G29030.1 | Symbols: | Apoptosis inhibitory protein 5 (API5) | chr1:10129201-10133697 REVERSE LENGTH=556	1	1	1	>AT1G29030.1 | Symbols: | Apoptosis inhibitory protein 5 (API5) | chr1:10129201-10133697 REVERSE LENGTH=556	1	1	1	1	1	1	1	1	1	1	1	1	1	1	1	1	2.7	2.7	2.7	62.279	556	556	1	1	2	1	7.7795e-05	2.7	2.7	2.7	2.7	161780000	36751000	33120000	58820000	33085000	0	0	0	41563000	1	1	1	0
>AT1G29050.1 | Symbols: TBL38 | TRICHOME BIREFRINGENCE-LIKE 38 | chr1:10136376-10139082 REVERSE LENGTH=380	>AT1G29050.1 | Symbols: TBL38 | TRICHOME BIREFRINGENCE-LIKE 38 | chr1:10136376-10139082 REVERSE LENGTH=380	2	2	2	>AT1G29050.1 | Symbols: TBL38 | TRICHOME BIREFRINGENCE-LIKE 38 | chr1:10136376-10139082 REVERSE LENGTH=380	1	2	2	2	1	0	1	1	1	0	1	1	1	0	1	1	7.1	7.1	7.1	42.708	380	380	1		1	1	1.1594e-07	3.9	0	3.2	3.2	81811000	49208000	0	24287000	8316400	49208000	0	0	0	1	0	1	0
>AT1G29060.1 | Symbols: | Target SNARE coiled-coil domain protein | chr1:10147857-10149459 FORWARD LENGTH=134;>AT4G14600.1 | Symbols: | Target SNARE coiled-coil domain protein | chr4:8376562-8378078 FORWARD LENGTH=137	>AT1G29060.1 | Symbols: | Target SNARE coiled-coil domain protein | chr1:10147857-10149459 FORWARD LENGTH=134;>AT4G14600.1 | Symbols: | Target SNARE coiled-coil domain protein | chr4:8376562-8378078 FORWARD LENGTH=137	1;1	1;1	1;1	>AT1G29060.1 | Symbols: | Target SNARE coiled-coil domain protein | chr1:10147857-10149459 FORWARD LENGTH=134;>AT4G14600.1 | Symbols: | Target SNARE coiled-coil domain protein | chr4:8376562-8378078 FORWARD LENGTH=137	2	1	1	1	0	0	1	1	0	0	1	1	0	0	1	1	9	9	9	15.102	134	134;137			1	2	4.1157e-07	0	0	9	9	22546000	0	0	7623600	14922000	0	0	0	11532000	0	0	1	2
>AT1G29150.1 | Symbols: ATS9, RPN6 | non-ATPase subunit 9 | chr1:10181240-10182499 FORWARD LENGTH=419	>AT1G29150.1 | Symbols: ATS9, RPN6 | non-ATPase subunit 9 | chr1:10181240-10182499 FORWARD LENGTH=419	14	14	14	>AT1G29150.1 | Symbols: ATS9, RPN6 | non-ATPase subunit 9 | chr1:10181240-10182499 FORWARD LENGTH=419	1	14	14	14	12	12	14	13	12	12	14	13	12	12	14	13	44.2	44.2	44.2	46.749	419	419	16	16	20	19	6.6219e-125	35.8	35.8	44.2	39.6	11342000000	2809000000	2725500000	3118200000	2688900000	3179100000	3068200000	3104200000	3101200000	10	9	19	13
>AT1G29250.1 | Symbols: | Alba DNA/RNA-binding protein | chr1:10223461-10224592 REVERSE LENGTH=130	>AT1G29250.1 | Symbols: | Alba DNA/RNA-binding protein | chr1:10223461-10224592 REVERSE LENGTH=130	4	4	2	>AT1G29250.1 | Symbols: | Alba DNA/RNA-binding protein | chr1:10223461-10224592 REVERSE LENGTH=130	1	4	4	2	4	4	1	2	4	4	1	2	2	2	0	1	36.2	36.2	24.6	14.574	130	130	4	4	1	2	1.4533e-18	36.2	36.2	11.5	21.5	388580000	165230000	145470000	25816000	52057000	135270000	132510000	0	127570000	3	4	1	1
>AT1G29260.1 | Symbols: PEX7, ATPEX7 | peroxin 7 | chr1:10224923-10225876 FORWARD LENGTH=317	>AT1G29260.1 | Symbols: PEX7, ATPEX7 | peroxin 7 | chr1:10224923-10225876 FORWARD LENGTH=317	4	4	4	>AT1G29260.1 | Symbols: PEX7, ATPEX7 | peroxin 7 | chr1:10224923-10225876 FORWARD LENGTH=317	1	4	4	4	4	4	2	3	4	4	2	3	4	4	2	3	14.5	14.5	14.5	35.473	317	317	5	4	2	3	2.0929e-20	14.5	14.5	6.9	11	390100000	151310000	80744000	65202000	92844000	100850000	0	95732000	118470000	3	1	1	2
>AT2G34250.2 | Symbols: | SecY protein transport family protein | chr2:14462635-14464572 FORWARD LENGTH=475;>AT2G34250.1 | Symbols: | SecY protein transport family protein | chr2:14462635-14464572 FORWARD LENGTH=475;>AT1G29310.1 | Symbols: | SecY protein transport family protein | chr1:10252662-10254526 FORWARD LENGTH=475;>AT1G78720.1 | Symbols: | SecY protein transport family protein | chr1:2960…	>AT2G34250.2 | Symbols: | SecY protein transport family protein | chr2:14462635-14464572 FORWARD LENGTH=475;>AT2G34250.1 | Symbols: | SecY protein transport family protein | chr2:14462635-14464572 FORWARD LENGTH=475;>AT1G29310.1 | Symbols: | SecY protein transport family protein | chr1:10252662-10254526 FORWARD LENGTH=475	9;9;9;1	9;9;9;1	9;9;9;1	>AT2G34250.2 | Symbols: | SecY protein transport family protein | chr2:14462635-14464572 FORWARD LENGTH=475;>AT2G34250.1 | Symbols: | SecY protein transport family protein | chr2:14462635-14464572 FORWARD LENGTH=475;>AT1G29310.1 | Symbols: | SecY protei	4	9	9	9	9	9	9	9	9	9	9	9	9	9	9	9	20.8	20.8	20.8	52.097	475	475;475;475;475	11	12	11	9	3.7303e-57	20.8	20.8	20.8	20.8	19783000000	6282600000	8395100000	2202800000	2902500000	5290100000	6349900000	3596900000	3605300000	6	8	6	6
>AT1G29320.1 | Symbols: | Transducin/WD40 repeat-like superfamily protein | chr1:10255355-10258238 FORWARD LENGTH=468	>AT1G29320.1 | Symbols: | Transducin/WD40 repeat-like superfamily protein | chr1:10255355-10258238 FORWARD LENGTH=468	1	1	1	>AT1G29320.1 | Symbols: | Transducin/WD40 repeat-like superfamily protein | chr1:10255355-10258238 FORWARD LENGTH=468	1	1	1	1	0	1	1	1	0	1	1	1	0	1	1	1	3.4	3.4	3.4	52.27	468	468		1	1	1	0.0020248	0	3.4	3.4	3.4	47640000	0	21428000	17734000	8477700	0	0	0	10650000	0	1	0	0
[truncated: 4,096 more rows]
[truncated: 10 more columns]

## Sheet: 4546 proteins
Protein IDs	Peptide counts (all)	Sequence coverage [%]	Mol. weight [kDa]	Sequence length	PEP	Mutant_1	Mutant_2	WT_1	WT_2	Mutant_1	Mutant_2	WT_1	WT_2	ttest	Diff1	Ratio_mutant/WT		3
[truncated: 4,563 more rows]

## Sheet: 515 diff proteins
Protein IDs	Sequence coverage [%]	Mol. weight [kDa]	PEP	Mutant_1	Mutant_2	WT_1	WT_2	ttest	Diff	Ratio_mutant/WT	Ratio>2 & p<=0.05
[truncated: 515 more rows]

[truncated: 1 more sheets: 124 DAPs ratio>1.2 ]
