# Supplementary material for: MAG2 and MAL Regulate Vesicle Trafficking and Auxin Homeostasis With Functional Redundancy
Source: Front Plant Sci. 2022 Mar 16;13:849532. doi: 10.3389/fpls.2022.849532 (PMC8966843; doi:10.3389/fpls.2022.849532)
Supplement: Supplementary Table 2 — Gene Ontology (GO) enrichment analysis of differently accumulated proteins (DAPs). [file Table_2.xls]

id	num	pvalue	per	ratio	class	ID	Descrption	Pvalue	Qvalue	Up	Down	fg_num	bg_num
GO:0044444 cytoplasmic part	101	1.30E-21	87.826	0.011	Cellular Component	GO:0044444	cytoplasmic part	1.30E-21	2.95E-19	0	0	101	9480
GO:0005737 cytoplasm	105	8.91E-20	91.304	0.01	Cellular Component	GO:0005737	cytoplasm	8.91E-20	1.01E-17	0	0	105	10911
GO:0005829 cytosol	59	3.23E-18	51.304	0.017	Cellular Component	GO:0005829	cytosol	3.23E-18	2.45E-16	0	0	59	3391
GO:0022626 cytosolic ribosome	20	1.22E-15	17.391	0.061	Cellular Component	GO:0022626	cytosolic ribosome	1.22E-15	6.90E-14	0	0	20	326
GO:0044391 ribosomal subunit	20	3.59E-15	17.391	0.058	Cellular Component	GO:0044391	ribosomal subunit	3.59E-15	1.63E-13	0	0	20	345
GO:0044445 cytosolic part	20	1.22E-14	17.391	0.054	Cellular Component	GO:0044445	cytosolic part	1.22E-14	4.63E-13	0	0	20	368
GO:0005911 cell-cell junction	28	2.73E-13	24.348	0.029	Cellular Component	GO:0005911	cell-cell junction	2.73E-13	6.67E-12	0	0	28	967
GO:0009506 plasmodesma	28	2.73E-13	24.348	0.029	Cellular Component	GO:0009506	plasmodesma	2.73E-13	6.67E-12	0	0	28	967
GO:0055044 symplast	28	2.80E-13	24.348	0.029	Cellular Component	GO:0055044	symplast	2.80E-13	6.67E-12	0	0	28	968
GO:0030054 cell junction	28	2.94E-13	24.348	0.029	Cellular Component	GO:0030054	cell junction	2.94E-13	6.67E-12	0	0	28	970
GO:0003735 structural constituent of ribosome	20	2.81E-14	18.692	0.047	Molecular Function	GO:0003735	structural constituent of ribosome	2.81E-14	8.59E-12	0	0	20	423
GO:0005198 structural molecule activity	21	3.30E-13	19.626	0.038	Molecular Function	GO:0005198	structural molecule activity	3.30E-13	5.05E-11	0	0	21	546
GO:0044446 intracellular organelle part	69	3.37E-12	60	0.011	Cellular Component	GO:0044446	intracellular organelle part	3.37E-12	6.51E-11	0	0	69	6040
GO:0005773 vacuole	30	3.70E-12	26.087	0.024	Cellular Component	GO:0005773	vacuole	3.70E-12	6.51E-11	0	0	30	1247
GO:0044422 organelle part	69	3.73E-12	60	0.011	Cellular Component	GO:0044422	organelle part	3.73E-12	6.51E-11	0	0	69	6052
GO:0003729 mRNA binding	27	8.13E-13	25.234	0.026	Molecular Function	GO:0003729	mRNA binding	8.13E-13	8.29E-11	0	0	27	1030
GO:0005840 ribosome	20	9.71E-12	17.391	0.038	Cellular Component	GO:0005840	ribosome	9.71E-12	1.57E-10	0	0	20	528
GO:0022625 cytosolic large ribosomal subunit	12	3.05E-11	10.435	0.082	Cellular Component	GO:0022625	cytosolic large ribosomal subunit	3.05E-11	4.62E-10	0	0	12	147
GO:0032991 protein-containing complex	48	5.43E-11	41.739	0.014	Cellular Component	GO:0032991	protein-containing complex	5.43E-11	7.71E-10	0	0	48	3377
GO:0015934 large ribosomal subunit	12	8.17E-10	10.435	0.062	Cellular Component	GO:0015934	large ribosomal subunit	8.17E-10	1.09E-08	0	0	12	195
GO:0006518 peptide metabolic process	24	1.38E-11	21.818	0.025	Biological Process	GO:0006518	peptide metabolic process	1.38E-11	1.34E-08	0	0	24	950
GO:0005623 cell	113	1.64E-09	98.261	0.007	Cellular Component	GO:0005623	cell	1.64E-09	1.95E-08	0	0	113	16643
GO:0044464 cell part	113	1.64E-09	98.261	0.007	Cellular Component	GO:0044464	cell part	1.64E-09	1.95E-08	0	0	113	16643
GO:1990904 ribonucleoprotein complex	23	6.29E-09	20	0.023	Cellular Component	GO:1990904	ribonucleoprotein complex	6.29E-09	7.14E-08	0	0	23	1018
GO:0043603 cellular amide metabolic process	24	2.49E-10	21.818	0.022	Biological Process	GO:0043603	cellular amide metabolic process	2.49E-10	8.65E-08	0	0	24	1094
GO:0006412 translation	21	4.00E-10	19.091	0.025	Biological Process	GO:0006412	translation	4.00E-10	8.65E-08	0	0	21	842
GO:1901566 organonitrogen compound biosynthetic process	31	4.27E-10	28.182	0.017	Biological Process	GO:1901566	organonitrogen compound biosynthetic process	4.27E-10	8.65E-08	0	0	31	1876
GO:0043043 peptide biosynthetic process	21	4.45E-10	19.091	0.025	Biological Process	GO:0043043	peptide biosynthetic process	4.45E-10	8.65E-08	0	0	21	847
GO:0010035 response to inorganic substance	22	6.26E-10	20	0.023	Biological Process	GO:0010035	response to inorganic substance	6.26E-10	1.01E-07	0	0	22	954
GO:0005622 intracellular	106	1.21E-08	92.174	0.007	Cellular Component	GO:0005622	intracellular	1.21E-08	1.25E-07	0	0	106	14763
GO:0044424 intracellular part	106	1.21E-08	92.174	0.007	Cellular Component	GO:0044424	intracellular part	1.21E-08	1.25E-07	0	0	106	14763
GO:0005774 vacuolar membrane	18	2.13E-08	15.652	0.027	Cellular Component	GO:0005774	vacuolar membrane	2.13E-08	2.10E-07	0	0	18	661
GO:0044437 vacuolar part	18	2.23E-08	15.652	0.027	Cellular Component	GO:0044437	vacuolar part	2.23E-08	2.11E-07	0	0	18	663
GO:0009536 plastid	40	2.49E-08	34.783	0.013	Cellular Component	GO:0009536	plastid	2.49E-08	2.26E-07	0	0	40	2977
GO:0043604 amide biosynthetic process	21	2.24E-09	19.091	0.023	Biological Process	GO:0043604	amide biosynthetic process	2.24E-09	3.10E-07	0	0	21	927
GO:0005507 copper ion binding	11	4.53E-09	10.28	0.056	Molecular Function	GO:0005507	copper ion binding	4.53E-09	3.47E-07	0	0	11	197
GO:0043228 non-membrane-bounded organelle	31	5.45E-08	26.957	0.016	Cellular Component	GO:0043228	non-membrane-bounded organelle	5.45E-08	4.58E-07	0	0	31	1977
GO:0043232 intracellular non-membrane-bounded organelle	31	5.45E-08	26.957	0.016	Cellular Component	GO:0043232	intracellular non-membrane-bounded organelle	5.45E-08	4.58E-07	0	0	31	1977
GO:0042788 polysomal ribosome	8	6.80E-08	6.957	0.082	Cellular Component	GO:0042788	polysomal ribosome	6.80E-08	5.51E-07	0	0	8	98
GO:0003723 RNA binding	30	1.30E-08	28.037	0.016	Molecular Function	GO:0003723	RNA binding	1.30E-08	7.96E-07	0	0	30	1932
GO:0005844 polysome	8	1.45E-07	6.957	0.074	Cellular Component	GO:0005844	polysome	1.45E-07	1.14E-06	0	0	8	108
GO:0098805 whole membrane	21	1.83E-07	18.261	0.02	Cellular Component	GO:0098805	whole membrane	1.83E-07	1.38E-06	0	0	21	1031
GO:0022627 cytosolic small ribosomal subunit	8	2.06E-07	6.957	0.071	Cellular Component	GO:0022627	cytosolic small ribosomal subunit	2.06E-07	1.51E-06	0	0	8	113
GO:0010038 response to metal ion	14	1.83E-08	12.727	0.032	Biological Process	GO:0010038	response to metal ion	1.83E-08	2.22E-06	0	0	14	433
GO:0046686 response to cadmium ion	12	3.68E-08	10.909	0.038	Biological Process	GO:0046686	response to cadmium ion	3.68E-08	3.97E-06	0	0	12	317
GO:0031090 organelle membrane	30	6.73E-07	26.087	0.014	Cellular Component	GO:0031090	organelle membrane	6.73E-07	4.77E-06	0	0	30	2094
GO:0005618 cell wall	17	1.56E-06	14.783	0.021	Cellular Component	GO:0005618	cell wall	1.56E-06	1.07E-05	0	0	17	793
GO:0030312 external encapsulating structure	17	1.62E-06	14.783	0.021	Cellular Component	GO:0030312	external encapsulating structure	1.62E-06	1.08E-05	0	0	17	795
GO:0015935 small ribosomal subunit	8	1.79E-06	6.957	0.053	Cellular Component	GO:0015935	small ribosomal subunit	1.79E-06	1.16E-05	0	0	8	150
GO:0043229 intracellular organelle	95	2.54E-06	82.609	0.007	Cellular Component	GO:0043229	intracellular organelle	2.54E-06	1.60E-05	0	0	95	13120
GO:0043226 organelle	95	3.52E-06	82.609	0.007	Cellular Component	GO:0043226	organelle	3.52E-06	2.16E-05	0	0	95	13189
GO:0009522 photosystem I	5	3.75E-06	4.348	0.116	Cellular Component	GO:0009522	photosystem I	3.75E-06	2.24E-05	0	0	5	43
GO:0042221 response to chemical	36	2.77E-07	32.727	0.011	Biological Process	GO:0042221	response to chemical	2.77E-07	2.69E-05	0	0	36	3182
GO:0016168 chlorophyll binding	5	7.18E-07	4.673	0.147	Molecular Function	GO:0016168	chlorophyll binding	7.18E-07	3.66E-05	0	0	5	34
GO:0005739 mitochondrion	26	1.39E-05	22.609	0.013	Cellular Component	GO:0005739	mitochondrion	1.39E-05	8.02E-05	0	0	26	1932
GO:0009521 photosystem	6	1.41E-05	5.217	0.063	Cellular Component	GO:0009521	photosystem	1.41E-05	8.02E-05	0	0	6	95
GO:0071944 cell periphery	42	2.31E-05	36.522	0.01	Cellular Component	GO:0071944	cell periphery	2.31E-05	0.000127722	0	0	42	4152
GO:1901564 organonitrogen compound metabolic process	52	1.71E-06	47.273	0.009	Biological Process	GO:1901564	organonitrogen compound metabolic process	1.71E-06	0.000150684	0	0	52	6088
GO:0050896 response to stimulus	54	2.17E-06	49.091	0.008	Biological Process	GO:0050896	response to stimulus	2.17E-06	0.000175823	0	0	54	6496
GO:0098588 bounding membrane of organelle	21	3.93E-05	18.261	0.014	Cellular Component	GO:0098588	bounding membrane of organelle	3.93E-05	0.000212405	0	0	21	1453
GO:0000276 mitochondrial proton-transporting ATP synthase complex, coupling factor F(o)	3	4.45E-05	2.609	0.231	Cellular Component	GO:0000276	mitochondrial proton-transporting ATP synthase complex, coupling factor F(o)	4.45E-05	0.000229881	0	0	3	13
GO:0033177 proton-transporting two-sector ATPase complex, proton-transporting domain	4	4.46E-05	3.478	0.111	Cellular Component	GO:0033177	proton-transporting two-sector ATPase complex, proton-transporting domain	4.46E-05	0.000229881	0	0	4	36
GO:0043231 intracellular membrane-bounded organelle	89	4.74E-05	77.391	0.007	Cellular Component	GO:0043231	intracellular membrane-bounded organelle	4.74E-05	0.000239244	0	0	89	12500
GO:0043227 membrane-bounded organelle	90	5.41E-05	78.261	0.007	Cellular Component	GO:0043227	membrane-bounded organelle	5.41E-05	0.000266023	0	0	90	12738
GO:0098796 membrane protein complex	13	5.69E-05	11.304	0.02	Cellular Component	GO:0098796	membrane protein complex	5.69E-05	0.000266023	0	0	13	647
GO:0031967 organelle envelope	19	5.74E-05	16.522	0.015	Cellular Component	GO:0031967	organelle envelope	5.74E-05	0.000266023	0	0	19	1264
GO:0031975 envelope	19	5.74E-05	16.522	0.015	Cellular Component	GO:0031975	envelope	5.74E-05	0.000266023	0	0	19	1264
GO:0009523 photosystem II	5	6.23E-05	4.348	0.066	Cellular Component	GO:0009523	photosystem II	6.23E-05	0.000282641	0	0	5	76
GO:0005886 plasma membrane	36	6.64E-05	31.304	0.01	Cellular Component	GO:0005886	plasma membrane	6.64E-05	0.000295642	0	0	36	3462
GO:0009768 photosynthesis, light harvesting in photosystem I	4	3.96E-06	3.636	0.174	Biological Process	GO:0009768	photosynthesis, light harvesting in photosystem I	3.96E-06	0.000295664	0	0	4	23
GO:0010287 plastoglobule	5	7.05E-05	4.348	0.064	Cellular Component	GO:0010287	plastoglobule	7.05E-05	0.000307851	0	0	5	78
GO:0009570 chloroplast stroma	14	0.000106916	12.174	0.018	Cellular Component	GO:0009570	chloroplast stroma	0.000106916	0.000457924	0	0	14	787
GO:0009507 chloroplast	28	0.0001153	24.348	0.011	Cellular Component	GO:0009507	chloroplast	0.0001153	0.000484234	0	0	28	2449
GO:0009532 plastid stroma	14	0.000117325	12.174	0.018	Cellular Component	GO:0009532	plastid stroma	0.000117325	0.000484234	0	0	14	794
GO:0018298 protein-chromophore linkage	5	8.22E-06	4.545	0.086	Biological Process	GO:0018298	protein-chromophore linkage	8.22E-06	0.000570041	0	0	5	58
GO:0045263 proton-transporting ATP synthase complex, coupling factor F(o)	3	0.000230911	2.609	0.136	Cellular Component	GO:0045263	proton-transporting ATP synthase complex, coupling factor F(o)	0.000230911	0.000936014	0	0	3	22
GO:0018973 trinitrotoluene metabolic process	2	2.23E-05	1.818	1	Biological Process	GO:0018973	trinitrotoluene metabolic process	2.23E-05	0.000984086	0	0	2	2
GO:0018974 2,4,6-trinitrotoluene metabolic process	2	2.23E-05	1.818	1	Biological Process	GO:0018974	2,4,6-trinitrotoluene metabolic process	2.23E-05	0.000984086	0	0	2	2
GO:0019326 nitrotoluene metabolic process	2	2.23E-05	1.818	1	Biological Process	GO:0019326	nitrotoluene metabolic process	2.23E-05	0.000984086	0	0	2	2
GO:0046256 2,4,6-trinitrotoluene catabolic process	2	2.23E-05	1.818	1	Biological Process	GO:0046256	2,4,6-trinitrotoluene catabolic process	2.23E-05	0.000984086	0	0	2	2
GO:0046260 trinitrotoluene catabolic process	2	2.23E-05	1.818	1	Biological Process	GO:0046260	trinitrotoluene catabolic process	2.23E-05	0.000984086	0	0	2	2
GO:0046263 nitrotoluene catabolic process	2	2.23E-05	1.818	1	Biological Process	GO:0046263	nitrotoluene catabolic process	2.23E-05	0.000984086	0	0	2	2
GO:0072490 toluene-containing compound metabolic process	2	2.23E-05	1.818	1	Biological Process	GO:0072490	toluene-containing compound metabolic process	2.23E-05	0.000984086	0	0	2	2
GO:0072491 toluene-containing compound catabolic process	2	2.23E-05	1.818	1	Biological Process	GO:0072491	toluene-containing compound catabolic process	2.23E-05	0.000984086	0	0	2	2
GO:0009765 photosynthesis, light harvesting	4	2.51E-05	3.636	0.111	Biological Process	GO:0009765	photosynthesis, light harvesting	2.51E-05	0.001060113	0	0	4	36
GO:0019904 protein domain specific binding	5	2.52E-05	4.673	0.072	Molecular Function	GO:0019904	protein domain specific binding	2.52E-05	0.001102705	0	0	5	69
GO:0098754 detoxification	8	3.07E-05	7.273	0.031	Biological Process	GO:0098754	detoxification	3.07E-05	0.001242185	0	0	8	256
GO:0005743 mitochondrial inner membrane	8	0.000393696	6.957	0.025	Cellular Component	GO:0005743	mitochondrial inner membrane	0.000393696	0.001567876	0	0	8	320
GO:0005753 mitochondrial proton-transporting ATP synthase complex	3	0.000429887	2.609	0.111	Cellular Component	GO:0005753	mitochondrial proton-transporting ATP synthase complex	0.000429887	0.00168249	0	0	3	27
GO:0044434 chloroplast part	19	0.000565951	16.522	0.013	Cellular Component	GO:0044434	chloroplast part	0.000565951	0.002152091	0	0	19	1511
GO:0016469 proton-transporting two-sector ATPase complex	4	0.000568835	3.478	0.058	Cellular Component	GO:0016469	proton-transporting two-sector ATPase complex	0.000568835	0.002152091	0	0	4	69
GO:0031966 mitochondrial membrane	9	0.000600432	7.826	0.021	Cellular Component	GO:0031966	mitochondrial membrane	0.000600432	0.002234395	0	0	9	428
GO:0044435 plastid part	19	0.000628184	16.522	0.012	Cellular Component	GO:0044435	plastid part	0.000628184	0.002299965	0	0	19	1524
GO:0005740 mitochondrial envelope	9	0.000754723	7.826	0.02	Cellular Component	GO:0005740	mitochondrial envelope	0.000754723	0.002713888	0	0	9	442
GO:0005730 nucleolus	10	0.000765149	8.696	0.019	Cellular Component	GO:0005730	nucleolus	0.000765149	0.002713888	0	0	10	537
GO:0042274 ribosomal small subunit biogenesis	5	8.17E-05	4.545	0.054	Biological Process	GO:0042274	ribosomal small subunit biogenesis	8.17E-05	0.00317409	0	0	5	93
GO:0009407 toxin catabolic process	4	8.61E-05	3.636	0.082	Biological Process	GO:0009407	toxin catabolic process	8.61E-05	0.003216945	0	0	4	49
GO:0009987 cellular process	87	9.29E-05	79.091	0.006	Biological Process	GO:0009987	cellular process	9.29E-05	0.003301616	0	0	87	14387
GO:0009645 response to low light intensity stimulus	3	9.52E-05	2.727	0.158	Biological Process	GO:0009645	response to low light intensity stimulus	9.52E-05	0.003301616	0	0	3	19
GO:0048046 apoplast	9	0.001045625	7.826	0.019	Cellular Component	GO:0048046	apoplast	0.001045625	0.003651646	0	0	9	463
GO:0002181 cytoplasmic translation	5	0.000151763	4.545	0.047	Biological Process	GO:0002181	cytoplasmic translation	0.000151763	0.005081452	0	0	5	106
GO:0045259 proton-transporting ATP synthase complex	3	0.001481479	2.609	0.073	Cellular Component	GO:0045259	proton-transporting ATP synthase complex	0.001481479	0.005095391	0	0	3	41
GO:0009409 response to cold	9	0.000165955	8.182	0.022	Biological Process	GO:0009409	response to cold	0.000165955	0.005371414	0	0	9	416
GO:0044429 mitochondrial part	10	0.001821341	8.696	0.017	Cellular Component	GO:0044429	mitochondrial part	0.001821341	0.006170813	0	0	10	603
GO:0042254 ribosome biogenesis	9	0.000212222	8.182	0.021	Biological Process	GO:0042254	ribosome biogenesis	0.000212222	0.00664734	0	0	9	430
GO:0019693 ribose phosphate metabolic process	8	0.000220165	7.273	0.024	Biological Process	GO:0019693	ribose phosphate metabolic process	0.000220165	0.006680635	0	0	8	340
GO:1901135 carbohydrate derivative metabolic process	13	0.000230154	11.818	0.015	Biological Process	GO:1901135	carbohydrate derivative metabolic process	0.000230154	0.006772117	0	0	13	864
GO:0098800 inner mitochondrial membrane protein complex	5	0.002194416	4.348	0.03	Cellular Component	GO:0098800	inner mitochondrial membrane protein complex	0.002194416	0.007325476	0	0	5	165
GO:0009579 thylakoid	10	0.00228293	8.696	0.016	Cellular Component	GO:0009579	thylakoid	0.00228293	0.00751051	0	0	10	622
GO:0019866 organelle inner membrane	8	0.002320881	6.957	0.019	Cellular Component	GO:0019866	organelle inner membrane	0.002320881	0.007526286	0	0	8	422
GO:0099503 secretory vesicle	5	0.002693697	4.348	0.029	Cellular Component	GO:0099503	secretory vesicle	0.002693697	0.008612243	0	0	5	173
GO:0098662 inorganic cation transmembrane transport	8	0.000311425	7.273	0.022	Biological Process	GO:0098662	inorganic cation transmembrane transport	0.000311425	0.008893946	0	0	8	358
GO:0022613 ribonucleoprotein complex biogenesis	10	0.000322242	9.091	0.018	Biological Process	GO:0022613	ribonucleoprotein complex biogenesis	0.000322242	0.008939927	0	0	10	557
GO:0015979 photosynthesis	7	0.000343781	6.364	0.025	Biological Process	GO:0015979	photosynthesis	0.000343781	0.009272538	0	0	7	275
GO:0009404 toxin metabolic process	4	0.000364625	3.636	0.056	Biological Process	GO:0009404	toxin metabolic process	0.000364625	0.009568944	0	0	4	71
GO:0009636 response to toxic substance	8	0.000394915	7.273	0.022	Biological Process	GO:0009636	response to toxic substance	0.000394915	0.010091127	0	0	8	371
GO:0009126 purine nucleoside monophosphate metabolic process	6	0.000431623	5.455	0.029	Biological Process	GO:0009126	purine nucleoside monophosphate metabolic process	0.000431623	0.010477655	0	0	6	204
GO:0009167 purine ribonucleoside monophosphate metabolic process	6	0.000431623	5.455	0.029	Biological Process	GO:0009167	purine ribonucleoside monophosphate metabolic process	0.000431623	0.010477655	0	0	6	204
GO:0042537 benzene-containing compound metabolic process	4	0.00044954	3.636	0.053	Biological Process	GO:0042537	benzene-containing compound metabolic process	0.00044954	0.010646429	0	0	4	75
GO:0019684 photosynthesis, light reaction	5	0.000624759	4.545	0.035	Biological Process	GO:0019684	photosynthesis, light reaction	0.000624759	0.014443843	0	0	5	144
GO:0009161 ribonucleoside monophosphate metabolic process	6	0.000657704	5.455	0.027	Biological Process	GO:0009161	ribonucleoside monophosphate metabolic process	0.000657704	0.014477874	0	0	6	221
GO:0044267 cellular protein metabolic process	35	0.000684566	31.818	0.008	Biological Process	GO:0044267	cellular protein metabolic process	0.000684566	0.014477874	0	0	35	4344
GO:0009127 purine nucleoside monophosphate biosynthetic process	5	0.000685873	4.545	0.034	Biological Process	GO:0009127	purine nucleoside monophosphate biosynthetic process	0.000685873	0.014477874	0	0	5	147
GO:0009168 purine ribonucleoside monophosphate biosynthetic process	5	0.000685873	4.545	0.034	Biological Process	GO:0009168	purine ribonucleoside monophosphate biosynthetic process	0.000685873	0.014477874	0	0	5	147
GO:0034220 ion transmembrane transport	10	0.000705011	9.091	0.016	Biological Process	GO:0034220	ion transmembrane transport	0.000705011	0.014513459	0	0	10	616
GO:0000462 maturation of SSU-rRNA from tricistronic rRNA transcript (SSU-rRNA, 5.8S rRNA, LSU-rRNA)	3	0.000717452	2.727	0.081	Biological Process	GO:0000462	maturation of SSU-rRNA from tricistronic rRNA transcript (SSU-rRNA, 5.8S rRNA, LSU-rRNA)	0.000717452	0.014513459	0	0	3	37
GO:0098655 cation transmembrane transport	8	0.000736678	7.273	0.02	Biological Process	GO:0098655	cation transmembrane transport	0.000736678	0.014598261	0	0	8	408
GO:0098660 inorganic ion transmembrane transport	8	0.000797109	7.273	0.019	Biological Process	GO:0098660	inorganic ion transmembrane transport	0.000797109	0.015479857	0	0	8	413
GO:0000786 nucleosome	3	0.005056458	2.609	0.048	Cellular Component	GO:0000786	nucleosome	0.005056458	0.015941887	0	0	3	63
GO:0019682 glyceraldehyde-3-phosphate metabolic process	3	0.00083807	2.727	0.077	Biological Process	GO:0019682	glyceraldehyde-3-phosphate metabolic process	0.00083807	0.015956187	0	0	3	39
GO:0030929 ADPG pyrophosphorylase complex	1	0.005497132	0.87	1	Cellular Component	GO:0030929	ADPG pyrophosphorylase complex	0.005497132	0.016862824	0	0	1	1
GO:0030931 heterotetrameric ADPG pyrophosphorylase complex	1	0.005497132	0.87	1	Cellular Component	GO:0030931	heterotetrameric ADPG pyrophosphorylase complex	0.005497132	0.016862824	0	0	1	1
GO:0010043 response to zinc ion	3	0.000970844	2.727	0.073	Biological Process	GO:0010043	response to zinc ion	0.000970844	0.01812864	0	0	3	41
GO:0019538 protein metabolic process	37	0.001018814	33.636	0.008	Biological Process	GO:0019538	protein metabolic process	0.001018814	0.018575211	0	0	37	4790
GO:0009117 nucleotide metabolic process	8	0.001033096	7.273	0.019	Biological Process	GO:0009117	nucleotide metabolic process	0.001033096	0.018575211	0	0	8	430
GO:0009123 nucleoside monophosphate metabolic process	6	0.001053025	5.455	0.025	Biological Process	GO:0009123	nucleoside monophosphate metabolic process	0.001053025	0.018575211	0	0	6	242
GO:0044085 cellular component biogenesis	17	0.001073895	15.455	0.011	Biological Process	GO:0044085	cellular component biogenesis	0.001073895	0.018575211	0	0	17	1561
GO:0009156 ribonucleoside monophosphate biosynthetic process	5	0.001090409	4.545	0.031	Biological Process	GO:0009156	ribonucleoside monophosphate biosynthetic process	0.001090409	0.018575211	0	0	5	163
GO:0009941 chloroplast envelope	10	0.00619529	8.696	0.014	Cellular Component	GO:0009941	chloroplast envelope	0.00619529	0.018751076	0	0	10	717
GO:0055086 nucleobase-containing small molecule metabolic process	9	0.001148012	8.182	0.017	Biological Process	GO:0055086	nucleobase-containing small molecule metabolic process	0.001148012	0.019219302	0	0	9	544
GO:0006753 nucleoside phosphate metabolic process	8	0.001248887	7.273	0.018	Biological Process	GO:0006753	nucleoside phosphate metabolic process	0.001248887	0.020300279	0	0	8	443
GO:0044237 cellular metabolic process	71	0.001300834	64.545	0.006	Biological Process	GO:0044237	cellular metabolic process	0.001300834	0.020300279	0	0	71	11561
GO:1901137 carbohydrate derivative biosynthetic process	9	0.00130225	8.182	0.016	Biological Process	GO:1901137	carbohydrate derivative biosynthetic process	0.00130225	0.020300279	0	0	9	554
GO:0009124 nucleoside monophosphate biosynthetic process	5	0.001314214	4.545	0.029	Biological Process	GO:0009124	nucleoside monophosphate biosynthetic process	0.001314214	0.020300279	0	0	5	170
GO:0046034 ATP metabolic process	5	0.001348757	4.545	0.029	Biological Process	GO:0046034	ATP metabolic process	0.001348757	0.020300279	0	0	5	171
GO:0015985 energy coupled proton transport, down electrochemical gradient	3	0.001358927	2.727	0.065	Biological Process	GO:0015985	energy coupled proton transport, down electrochemical gradient	0.001358927	0.020300279	0	0	3	46
GO:0015986 ATP synthesis coupled proton transport	3	0.001358927	2.727	0.065	Biological Process	GO:0015986	ATP synthesis coupled proton transport	0.001358927	0.020300279	0	0	3	46
GO:0006878 cellular copper ion homeostasis	2	0.00142658	1.818	0.167	Biological Process	GO:0006878	cellular copper ion homeostasis	0.00142658	0.020674761	0	0	2	12
GO:0035434 copper ion transmembrane transport	2	0.00142658	1.818	0.167	Biological Process	GO:0035434	copper ion transmembrane transport	0.00142658	0.020674761	0	0	2	12
GO:0044249 cellular biosynthetic process	41	0.001456047	37.273	0.007	Biological Process	GO:0044249	cellular biosynthetic process	0.001456047	0.020791502	0	0	41	5606
GO:0044815 DNA packaging complex	3	0.007050539	2.609	0.042	Cellular Component	GO:0044815	DNA packaging complex	0.007050539	0.021058848	0	0	3	71
GO:0009526 plastid envelope	10	0.007393067	8.696	0.014	Cellular Component	GO:0009526	plastid envelope	0.007393067	0.021795144	0	0	10	736
GO:0009205 purine ribonucleoside triphosphate metabolic process	5	0.001690559	4.545	0.028	Biological Process	GO:0009205	purine ribonucleoside triphosphate metabolic process	0.001690559	0.023764122	0	0	5	180
GO:0009694 jasmonic acid metabolic process	3	0.00173066	2.727	0.06	Biological Process	GO:0009694	jasmonic acid metabolic process	0.00173066	0.023764122	0	0	3	50
GO:0009058 biosynthetic process	42	0.001737644	38.182	0.007	Biological Process	GO:0009058	biosynthetic process	0.001737644	0.023764122	0	0	42	5840
GO:0009144 purine nucleoside triphosphate metabolic process	5	0.001817477	4.545	0.027	Biological Process	GO:0009144	purine nucleoside triphosphate metabolic process	0.001817477	0.024510699	0	0	5	183
GO:0009152 purine ribonucleotide biosynthetic process	5	0.001951247	4.545	0.027	Biological Process	GO:0009152	purine ribonucleotide biosynthetic process	0.001951247	0.025308154	0	0	5	186
GO:0006825 copper ion transport	2	0.001954801	1.818	0.143	Biological Process	GO:0006825	copper ion transport	0.001954801	0.025308154	0	0	2	14
GO:0009051 pentose-phosphate shunt, oxidative branch	2	0.001954801	1.818	0.143	Biological Process	GO:0009051	pentose-phosphate shunt, oxidative branch	0.001954801	0.025308154	0	0	2	14
GO:1901576 organic substance biosynthetic process	41	0.002042951	37.273	0.007	Biological Process	GO:1901576	organic substance biosynthetic process	0.002042951	0.026101382	0	0	41	5701
GO:0044281 small molecule metabolic process	19	0.002121251	17.273	0.01	Biological Process	GO:0044281	small molecule metabolic process	0.002121251	0.026749799	0	0	19	1962
GO:0006164 purine nucleotide biosynthetic process	5	0.002190013	4.545	0.026	Biological Process	GO:0006164	purine nucleotide biosynthetic process	0.002190013	0.026767122	0	0	5	191
GO:0009199 ribonucleoside triphosphate metabolic process	5	0.002190013	4.545	0.026	Biological Process	GO:0009199	ribonucleoside triphosphate metabolic process	0.002190013	0.026767122	0	0	5	191
GO:0009150 purine ribonucleotide metabolic process	6	0.002205324	5.455	0.021	Biological Process	GO:0009150	purine ribonucleotide metabolic process	0.002205324	0.026767122	0	0	6	280
GO:0030490 maturation of SSU-rRNA	3	0.002277105	2.727	0.055	Biological Process	GO:0030490	maturation of SSU-rRNA	0.002277105	0.02729715	0	0	3	55
GO:0006091 generation of precursor metabolites and energy	8	0.002345741	7.273	0.016	Biological Process	GO:0006091	generation of precursor metabolites and energy	0.002345741	0.027777004	0	0	8	490
GO:0006754 ATP biosynthetic process	4	0.002428846	3.636	0.034	Biological Process	GO:0006754	ATP biosynthetic process	0.002428846	0.028414577	0	0	4	118
GO:0009534 chloroplast thylakoid	8	0.009958848	6.957	0.015	Cellular Component	GO:0009534	chloroplast thylakoid	0.009958848	0.028554039	0	0	8	540
GO:0009505 plant-type cell wall	5	0.010024779	4.348	0.021	Cellular Component	GO:0009505	plant-type cell wall	0.010024779	0.028554039	0	0	5	237
GO:0031976 plastid thylakoid	8	0.010063097	6.957	0.015	Cellular Component	GO:0031976	plastid thylakoid	0.010063097	0.028554039	0	0	8	541
GO:1901700 response to oxygen-containing compound	17	0.002492038	15.455	0.01	Biological Process	GO:1901700	response to oxygen-containing compound	0.002492038	0.028806768	0	0	17	1689
GO:0044455 mitochondrial membrane part	5	0.010369383	4.348	0.021	Cellular Component	GO:0044455	mitochondrial membrane part	0.010369383	0.029059875	0	0	5	239
GO:0072522 purine-containing compound biosynthetic process	5	0.002615406	4.545	0.025	Biological Process	GO:0072522	purine-containing compound biosynthetic process	0.002615406	0.029877171	0	0	5	199
GO:0009783 photosystem II antenna complex	1	0.010964307	0.87	0.5	Cellular Component	GO:0009783	photosystem II antenna complex	0.010964307	0.03035241	0	0	1	2
GO:0098798 mitochondrial protein complex	5	0.011451832	4.348	0.02	Cellular Component	GO:0098798	mitochondrial protein complex	0.011451832	0.031173742	0	0	5	245
GO:0009535 chloroplast thylakoid membrane	7	0.011540852	6.087	0.016	Cellular Component	GO:0009535	chloroplast thylakoid membrane	0.011540852	0.031173742	0	0	7	445
GO:0055035 plastid thylakoid membrane	7	0.011672987	6.087	0.016	Cellular Component	GO:0055035	plastid thylakoid membrane	0.011672987	0.031173742	0	0	7	446
GO:0009141 nucleoside triphosphate metabolic process	5	0.002789406	4.545	0.025	Biological Process	GO:0009141	nucleoside triphosphate metabolic process	0.002789406	0.03135877	0	0	5	202
GO:0006364 rRNA processing	6	0.002809694	5.455	0.02	Biological Process	GO:0006364	rRNA processing	0.002809694	0.03135877	0	0	6	294
GO:0006163 purine nucleotide metabolic process	6	0.003003211	5.455	0.02	Biological Process	GO:0006163	purine nucleotide metabolic process	0.003003211	0.032874199	0	0	6	298
GO:0009145 purine nucleoside triphosphate biosynthetic process	4	0.00307781	3.636	0.032	Biological Process	GO:0009145	purine nucleoside triphosphate biosynthetic process	0.00307781	0.032874199	0	0	4	126
GO:0009206 purine ribonucleoside triphosphate biosynthetic process	4	0.00307781	3.636	0.032	Biological Process	GO:0009206	purine ribonucleoside triphosphate biosynthetic process	0.00307781	0.032874199	0	0	4	126
GO:0009414 response to water deprivation	7	0.003080898	6.364	0.017	Biological Process	GO:0009414	response to water deprivation	0.003080898	0.032874199	0	0	7	402
GO:0009266 response to temperature stimulus	9	0.003201349	8.182	0.014	Biological Process	GO:0009266	response to temperature stimulus	0.003201349	0.033788154	0	0	9	633
GO:0055070 copper ion homeostasis	2	0.003246208	1.818	0.111	Biological Process	GO:0055070	copper ion homeostasis	0.003246208	0.033893203	0	0	2	18
GO:0009260 ribonucleotide biosynthetic process	5	0.003294288	4.545	0.024	Biological Process	GO:0009260	ribonucleotide biosynthetic process	0.003294288	0.034029294	0	0	5	210
GO:0046916 cellular transition metal ion homeostasis	3	0.003353538	2.727	0.048	Biological Process	GO:0046916	cellular transition metal ion homeostasis	0.003353538	0.034042285	0	0	3	63
GO:0009259 ribonucleotide metabolic process	6	0.003365664	5.455	0.02	Biological Process	GO:0009259	ribonucleotide metabolic process	0.003365664	0.034042285	0	0	6	305
GO:0009415 response to water	7	0.003479199	6.364	0.017	Biological Process	GO:0009415	response to water	0.003479199	0.034827854	0	0	7	411
GO:0016072 rRNA metabolic process	6	0.003586901	5.455	0.019	Biological Process	GO:0016072	rRNA metabolic process	0.003586901	0.035358498	0	0	6	309
GO:0006812 cation transport	8	0.003611599	7.273	0.015	Biological Process	GO:0006812	cation transport	0.003611599	0.035358498	0	0	8	526
GO:0046390 ribose phosphate biosynthetic process	5	0.003641452	4.545	0.023	Biological Process	GO:0046390	ribose phosphate biosynthetic process	0.003641452	0.035358498	0	0	5	215
GO:0005777 peroxisome	6	0.014271222	5.217	0.017	Cellular Component	GO:0005777	peroxisome	0.014271222	0.037116374	0	0	6	358
GO:0042579 microbody	6	0.014271222	5.217	0.017	Cellular Component	GO:0042579	microbody	0.014271222	0.037116374	0	0	6	358
GO:0034357 photosynthetic membrane	7	0.014552235	6.087	0.015	Cellular Component	GO:0034357	photosynthetic membrane	0.014552235	0.037116374	0	0	7	466
GO:0042651 thylakoid membrane	7	0.014552235	6.087	0.015	Cellular Component	GO:0042651	thylakoid membrane	0.014552235	0.037116374	0	0	7	466
GO:0006950 response to stress	30	0.00410255	27.273	0.008	Biological Process	GO:0006950	response to stress	0.00410255	0.039441352	0	0	30	3913
GO:0009201 ribonucleoside triphosphate biosynthetic process	4	0.004150592	3.636	0.029	Biological Process	GO:0009201	ribonucleoside triphosphate biosynthetic process	0.004150592	0.039512006	0	0	4	137
GO:1901681 sulfur compound binding	3	0.001060707	2.804	0.075	Molecular Function	GO:1901681	sulfur compound binding	0.001060707	0.040572053	0	0	3	40
GO:0031463 Cul3-RING ubiquitin ligase complex	1	0.016401686	0.87	0.333	Cellular Component	GO:0031463	Cul3-RING ubiquitin ligase complex	0.016401686	0.041368698	0	0	1	3
GO:0006811 ion transport	11	0.004459244	10	0.012	Biological Process	GO:0006811	ion transport	0.004459244	0.041494276	0	0	11	924
GO:0009642 response to light intensity	4	0.004481898	3.636	0.029	Biological Process	GO:0009642	response to light intensity	0.004481898	0.041494276	0	0	4	140
GO:0009142 nucleoside triphosphate biosynthetic process	4	0.004712405	3.636	0.028	Biological Process	GO:0009142	nucleoside triphosphate biosynthetic process	0.004712405	0.041494276	0	0	4	142
GO:0010111 glyoxysome organization	1	0.004743424	0.909	1	Biological Process	GO:0010111	glyoxysome organization	0.004743424	0.041494276	0	0	1	1
GO:0015677 copper ion import	1	0.004743424	0.909	1	Biological Process	GO:0015677	copper ion import	0.004743424	0.041494276	0	0	1	1
GO:0015679 plasma membrane copper ion transport	1	0.004743424	0.909	1	Biological Process	GO:0015679	plasma membrane copper ion transport	0.004743424	0.041494276	0	0	1	1
GO:0015680 protein maturation by copper ion transfer	1	0.004743424	0.909	1	Biological Process	GO:0015680	protein maturation by copper ion transfer	0.004743424	0.041494276	0	0	1	1
GO:0080184 response to phenylpropanoid	1	0.004743424	0.909	1	Biological Process	GO:0080184	response to phenylpropanoid	0.004743424	0.041494276	0	0	1	1
GO:0098705 copper ion import across plasma membrane	1	0.004743424	0.909	1	Biological Process	GO:0098705	copper ion import across plasma membrane	0.004743424	0.041494276	0	0	1	1
GO:0072521 purine-containing compound metabolic process	6	0.004788534	5.455	0.018	Biological Process	GO:0072521	purine-containing compound metabolic process	0.004788534	0.041514876	0	0	6	328
GO:0015672 monovalent inorganic cation transport	5	0.004929019	4.545	0.022	Biological Process	GO:0015672	monovalent inorganic cation transport	0.004929019	0.042354667	0	0	5	231
GO:0032787 monocarboxylic acid metabolic process	8	0.005187902	7.273	0.014	Biological Process	GO:0032787	monocarboxylic acid metabolic process	0.005187902	0.04418818	0	0	8	559
GO:0005576 extracellular region	18	0.018170125	15.652	0.009	Cellular Component	GO:0005576	extracellular region	0.018170125	0.045083078	0	0	18	1931
GO:0044436 thylakoid part	7	0.018271556	6.087	0.014	Cellular Component	GO:0044436	thylakoid part	0.018271556	0.045083078	0	0	7	488
GO:0005375 copper ion transmembrane transporter activity	2	0.001332361	1.869	0.182	Molecular Function	GO:0005375	copper ion transmembrane transporter activity	0.001332361	0.045300284	0	0	2	11
GO:0005544 calcium-dependent phospholipid binding	2	0.001593602	1.869	0.167	Molecular Function	GO:0005544	calcium-dependent phospholipid binding	0.001593602	0.048764212	0	0	2	12
GO:0005769 early endosome	2	0.020394719	1.739	0.05	Cellular Component	GO:0005769	early endosome	0.020394719	0.049780659	0	0	2	40
GO:0005853 eukaryotic translation elongation factor 1 complex	1	0.021809431	0.87	0.25	Cellular Component	GO:0005853	eukaryotic translation elongation factor 1 complex	0.021809431	0.052113063	0	0	1	4
GO:0034663 endoplasmic reticulum chaperone complex	1	0.021809431	0.87	0.25	Cellular Component	GO:0034663	endoplasmic reticulum chaperone complex	0.021809431	0.052113063	0	0	1	4
GO:0009695 jasmonic acid biosynthetic process	2	0.006228976	1.818	0.08	Biological Process	GO:0009695	jasmonic acid biosynthetic process	0.006228976	0.052594221	0	0	2	25
GO:0032993 protein-DNA complex	3	0.02283231	2.609	0.027	Cellular Component	GO:0032993	protein-DNA complex	0.02283231	0.053988901	0	0	3	110
GO:0046914 transition metal ion binding	15	0.00195059	14.019	0.012	Molecular Function	GO:0046914	transition metal ion binding	0.00195059	0.054261862	0	0	15	1290
GO:0006098 pentose-phosphate shunt	2	0.006727278	1.818	0.077	Biological Process	GO:0006098	pentose-phosphate shunt	0.006727278	0.056311953	0	0	2	26
GO:0001101 response to acid chemical	13	0.007233597	11.818	0.01	Biological Process	GO:0001101	response to acid chemical	0.007233597	0.058636904	0	0	13	1272
GO:0006071 glycerol metabolic process	2	0.007243095	1.818	0.074	Biological Process	GO:0006071	glycerol metabolic process	0.007243095	0.058636904	0	0	2	27
GO:0019400 alditol metabolic process	2	0.007243095	1.818	0.074	Biological Process	GO:0019400	alditol metabolic process	0.007243095	0.058636904	0	0	2	27
GO:0006081 cellular aldehyde metabolic process	3	0.007246579	2.727	0.036	Biological Process	GO:0006081	cellular aldehyde metabolic process	0.007246579	0.058636904	0	0	3	83
GO:1902600 proton transmembrane transport	4	0.007628839	3.636	0.025	Biological Process	GO:1902600	proton transmembrane transport	0.007628839	0.061219858	0	0	4	163
GO:0006749 glutathione metabolic process	3	0.007736971	2.727	0.035	Biological Process	GO:0006749	glutathione metabolic process	0.007736971	0.061578676	0	0	3	85
GO:0009628 response to abiotic stimulus	19	0.007876931	17.273	0.009	Biological Process	GO:0009628	response to abiotic stimulus	0.007876931	0.062182927	0	0	19	2214
GO:0008152 metabolic process	76	0.008048373	69.091	0.006	Biological Process	GO:0008152	metabolic process	0.008048373	0.063023953	0	0	76	13327
GO:1903409 reactive oxygen species biosynthetic process	2	0.008893907	1.818	0.067	Biological Process	GO:1903409	reactive oxygen species biosynthetic process	0.008893907	0.069087871	0	0	2	30
GO:0022890 inorganic cation transmembrane transporter activity	7	0.00289408	6.542	0.019	Molecular Function	GO:0022890	inorganic cation transmembrane transporter activity	0.00289408	0.0698322	0	0	7	376
GO:0015318 inorganic molecular entity transmembrane transporter activity	9	0.003499162	8.411	0.015	Molecular Function	GO:0015318	inorganic molecular entity transmembrane transporter activity	0.003499162	0.0698322	0	0	9	607
GO:0048037 cofactor binding	13	0.003712435	12.15	0.012	Molecular Function	GO:0048037	cofactor binding	0.003712435	0.0698322	0	0	13	1110
GO:0043295 glutathione binding	2	0.004035366	1.869	0.105	Molecular Function	GO:0043295	glutathione binding	0.004035366	0.0698322	0	0	2	19
GO:1900750 oligopeptide binding	2	0.004035366	1.869	0.105	Molecular Function	GO:1900750	oligopeptide binding	0.004035366	0.0698322	0	0	2	19
GO:0004364 glutathione transferase activity	3	0.004100046	2.804	0.047	Molecular Function	GO:0004364	glutathione transferase activity	0.004100046	0.0698322	0	0	3	64
GO:0003796 lysozyme activity	1	0.005018526	0.935	1	Molecular Function	GO:0003796	lysozyme activity	0.005018526	0.0698322	0	0	1	1
GO:0015089 high-affinity copper ion transmembrane transporter activity	1	0.005018526	0.935	1	Molecular Function	GO:0015089	high-affinity copper ion transmembrane transporter activity	0.005018526	0.0698322	0	0	1	1
GO:0019778 Atg12 activating enzyme activity	1	0.005018526	0.935	1	Molecular Function	GO:0019778	Atg12 activating enzyme activity	0.005018526	0.0698322	0	0	1	1
GO:0061783 peptidoglycan muralytic activity	1	0.005018526	0.935	1	Molecular Function	GO:0061783	peptidoglycan muralytic activity	0.005018526	0.0698322	0	0	1	1
GO:0008324 cation transmembrane transporter activity	7	0.005020616	6.542	0.017	Molecular Function	GO:0008324	cation transmembrane transporter activity	0.005020616	0.0698322	0	0	7	416
GO:0009416 response to light stimulus	9	0.00911946	8.182	0.012	Biological Process	GO:0009416	response to light stimulus	0.00911946	0.070153277	0	0	9	746
GO:0044271 cellular nitrogen compound biosynthetic process	30	0.009316648	27.273	0.007	Biological Process	GO:0044271	cellular nitrogen compound biosynthetic process	0.009316648	0.070153277	0	0	30	4141
GO:0000461 endonucleolytic cleavage to generate mature 3'-end of SSU-rRNA from (SSU-rRNA, 5.8S rRNA, LSU-rRNA)	1	0.009464551	0.909	0.5	Biological Process	GO:0000461	endonucleolytic cleavage to generate mature 3'-end of SSU-rRNA from (SSU-rRNA, 5.8S rRNA, LSU-rRNA)	0.009464551	0.070153277	0	0	1	2
GO:0046166 glyceraldehyde-3-phosphate biosynthetic process	1	0.009464551	0.909	0.5	Biological Process	GO:0046166	glyceraldehyde-3-phosphate biosynthetic process	0.009464551	0.070153277	0	0	1	2
GO:0110127 phloem unloading	1	0.009464551	0.909	0.5	Biological Process	GO:0110127	phloem unloading	0.009464551	0.070153277	0	0	1	2
GO:0110128 phloem sucrose unloading	1	0.009464551	0.909	0.5	Biological Process	GO:0110128	phloem sucrose unloading	0.009464551	0.070153277	0	0	1	2
GO:0003676 nucleic acid binding	35	0.005660508	32.71	0.008	Molecular Function	GO:0003676	nucleic acid binding	0.005660508	0.072517844	0	0	35	4638
GO:0016831 carboxy-lyase activity	3	0.005701733	2.804	0.042	Molecular Function	GO:0016831	carboxy-lyase activity	0.005701733	0.072517844	0	0	3	72
GO:0046915 transition metal ion transmembrane transporter activity	3	0.00592466	2.804	0.041	Molecular Function	GO:0046915	transition metal ion transmembrane transporter activity	0.00592466	0.072517844	0	0	3	73
GO:0031981 nuclear lumen	12	0.031246844	10.435	0.01	Cellular Component	GO:0031981	nuclear lumen	0.031246844	0.073124057	0	0	12	1194
GO:0009503 thylakoid light-harvesting complex	1	0.032536658	0.87	0.167	Cellular Component	GO:0009503	thylakoid light-harvesting complex	0.032536658	0.073126945	0	0	1	6
GO:0009517 PSII associated light-harvesting complex II	1	0.032536658	0.87	0.167	Cellular Component	GO:0009517	PSII associated light-harvesting complex II	0.032536658	0.073126945	0	0	1	6
GO:0030076 light-harvesting complex	1	0.032536658	0.87	0.167	Cellular Component	GO:0030076	light-harvesting complex	0.032536658	0.073126945	0	0	1	6
GO:0045298 tubulin complex	1	0.032536658	0.87	0.167	Cellular Component	GO:0045298	tubulin complex	0.032536658	0.073126945	0	0	1	6
GO:0009165 nucleotide biosynthetic process	5	0.010084852	4.545	0.018	Biological Process	GO:0009165	nucleotide biosynthetic process	0.010084852	0.074184785	0	0	5	275
GO:1901293 nucleoside phosphate biosynthetic process	5	0.010533939	4.545	0.018	Biological Process	GO:1901293	nucleoside phosphate biosynthetic process	0.010533939	0.076905672	0	0	5	278
GO:0000041 transition metal ion transport	3	0.010780841	2.727	0.031	Biological Process	GO:0000041	transition metal ion transport	0.010780841	0.078120873	0	0	3	96
GO:0009314 response to radiation	9	0.011063093	8.182	0.012	Biological Process	GO:0009314	response to radiation	0.011063093	0.079572323	0	0	9	770
GO:0043094 cellular metabolic compound salvage	3	0.011714776	2.727	0.03	Biological Process	GO:0043094	cellular metabolic compound salvage	0.011714776	0.083640058	0	0	3	99
GO:0012505 endomembrane system	21	0.038807963	18.261	0.008	Cellular Component	GO:0012505	endomembrane system	0.038807963	0.086366741	0	0	21	2561
GO:0046961 proton-transporting ATPase activity, rotational mechanism	2	0.008069682	1.869	0.074	Molecular Function	GO:0046961	proton-transporting ATPase activity, rotational mechanism	0.008069682	0.087045951	0	0	2	27
GO:0005372 water transmembrane transporter activity	2	0.008662164	1.869	0.071	Molecular Function	GO:0005372	water transmembrane transporter activity	0.008662164	0.087045951	0	0	2	28
GO:0015250 water channel activity	2	0.008662164	1.869	0.071	Molecular Function	GO:0015250	water channel activity	0.008662164	0.087045951	0	0	2	28
GO:0072341 modified amino acid binding	2	0.008662164	1.869	0.071	Molecular Function	GO:0072341	modified amino acid binding	0.008662164	0.087045951	0	0	2	28
GO:1901363 heterocyclic compound binding	52	0.009764129	48.598	0.007	Molecular Function	GO:1901363	heterocyclic compound binding	0.009764129	0.087045951	0	0	52	7913
GO:0004576 oligosaccharyl transferase activity	1	0.010012101	0.935	0.5	Molecular Function	GO:0004576	oligosaccharyl transferase activity	0.010012101	0.087045951	0	0	1	2
GO:0004579 dolichyl-diphosphooligosaccharide-protein glycotransferase activity	1	0.010012101	0.935	0.5	Molecular Function	GO:0004579	dolichyl-diphosphooligosaccharide-protein glycotransferase activity	0.010012101	0.087045951	0	0	1	2
GO:0004807 triose-phosphate isomerase activity	1	0.010012101	0.935	0.5	Molecular Function	GO:0004807	triose-phosphate isomerase activity	0.010012101	0.087045951	0	0	1	2
GO:0008114 phosphogluconate 2-dehydrogenase activity	1	0.010012101	0.935	0.5	Molecular Function	GO:0008114	phosphogluconate 2-dehydrogenase activity	0.010012101	0.087045951	0	0	1	2
GO:0046027 phospholipid:diacylglycerol acyltransferase activity	1	0.010012101	0.935	0.5	Molecular Function	GO:0046027	phospholipid:diacylglycerol acyltransferase activity	0.010012101	0.087045951	0	0	1	2
GO:0015078 proton transmembrane transporter activity	4	0.0102407	3.738	0.024	Molecular Function	GO:0015078	proton transmembrane transporter activity	0.0102407	0.087045951	0	0	4	168
GO:0097159 organic cyclic compound binding	52	0.010595814	48.598	0.007	Molecular Function	GO:0097159	organic cyclic compound binding	0.010595814	0.087630246	0	0	52	7943
GO:0051156 glucose 6-phosphate metabolic process	2	0.012645317	1.818	0.056	Biological Process	GO:0051156	glucose 6-phosphate metabolic process	0.012645317	0.089624838	0	0	2	36
GO:0031410 cytoplasmic vesicle	9	0.041239118	7.826	0.011	Cellular Component	GO:0031410	cytoplasmic vesicle	0.041239118	0.090689144	0	0	9	837
GO:0097708 intracellular vesicle	9	0.041763006	7.826	0.011	Cellular Component	GO:0097708	intracellular vesicle	0.041763006	0.090689144	0	0	9	839
GO:0008278 cohesin complex	1	0.043147258	0.87	0.125	Cellular Component	GO:0008278	cohesin complex	0.043147258	0.090689144	0	0	1	8
GO:0009538 photosystem I reaction center	1	0.043147258	0.87	0.125	Cellular Component	GO:0009538	photosystem I reaction center	0.043147258	0.090689144	0	0	1	8
GO:0009840 chloroplastic endopeptidase Clp complex	1	0.043147258	0.87	0.125	Cellular Component	GO:0009840	chloroplastic endopeptidase Clp complex	0.043147258	0.090689144	0	0	1	8
GO:0035619 root hair tip	1	0.043147258	0.87	0.125	Cellular Component	GO:0035619	root hair tip	0.043147258	0.090689144	0	0	1	8
GO:0055076 transition metal ion homeostasis	3	0.01303044	2.727	0.029	Biological Process	GO:0055076	transition metal ion homeostasis	0.01303044	0.091498465	0	0	3	103
GO:0071840 cellular component organization or biogenesis	27	0.013098132	24.545	0.007	Biological Process	GO:0071840	cellular component organization or biogenesis	0.013098132	0.091498465	0	0	27	3706
GO:0006739 NADP metabolic process	2	0.013326909	1.818	0.054	Biological Process	GO:0006739	NADP metabolic process	0.013326909	0.092431635	0	0	2	37
GO:0016052 carbohydrate catabolic process	5	0.013700011	4.545	0.017	Biological Process	GO:0016052	carbohydrate catabolic process	0.013700011	0.092923952	0	0	5	297
GO:0009617 response to bacterium	7	0.014002676	6.364	0.013	Biological Process	GO:0009617	response to bacterium	0.014002676	0.092923952	0	0	7	536
GO:0042631 cellular response to water deprivation	2	0.014024167	1.818	0.053	Biological Process	GO:0042631	cellular response to water deprivation	0.014024167	0.092923952	0	0	2	38
GO:0006427 histidyl-tRNA aminoacylation	1	0.014163486	0.909	0.333	Biological Process	GO:0006427	histidyl-tRNA aminoacylation	0.014163486	0.092923952	0	0	1	3
GO:0010124 phenylacetate catabolic process	1	0.014163486	0.909	0.333	Biological Process	GO:0010124	phenylacetate catabolic process	0.014163486	0.092923952	0	0	1	3
GO:0044805 late nucleophagy	1	0.014163486	0.909	0.333	Biological Process	GO:0044805	late nucleophagy	0.014163486	0.092923952	0	0	1	3
GO:0071435 potassium ion export	1	0.014163486	0.909	0.333	Biological Process	GO:0071435	potassium ion export	0.014163486	0.092923952	0	0	1	3
GO:0097623 potassium ion export across plasma membrane	1	0.014163486	0.909	0.333	Biological Process	GO:0097623	potassium ion export across plasma membrane	0.014163486	0.092923952	0	0	1	3
GO:0006833 water transport	2	0.014736929	1.818	0.051	Biological Process	GO:0006833	water transport	0.014736929	0.09414183	0	0	2	39
GO:0007031 peroxisome organization	2	0.014736929	1.818	0.051	Biological Process	GO:0007031	peroxisome organization	0.014736929	0.09414183	0	0	2	39
GO:0042044 fluid transport	2	0.014736929	1.818	0.051	Biological Process	GO:0042044	fluid transport	0.014736929	0.09414183	0	0	2	39
GO:0071462 cellular response to water stimulus	2	0.014736929	1.818	0.051	Biological Process	GO:0071462	cellular response to water stimulus	0.014736929	0.09414183	0	0	2	39
GO:0042277 peptide binding	3	0.011838565	2.804	0.032	Molecular Function	GO:0042277	peptide binding	0.011838565	0.095331604	0	0	3	94
GO:0006875 cellular metal ion homeostasis	3	0.015156301	2.727	0.028	Biological Process	GO:0006875	cellular metal ion homeostasis	0.015156301	0.096188029	0	0	3	109
GO:0000028 ribosomal small subunit assembly	2	0.015465035	1.818	0.05	Biological Process	GO:0000028	ribosomal small subunit assembly	0.015465035	0.096259932	0	0	2	40
GO:0048506 regulation of timing of meristematic phase transition	2	0.015465035	1.818	0.05	Biological Process	GO:0048506	regulation of timing of meristematic phase transition	0.015465035	0.096259932	0	0	2	40
GO:0048510 regulation of timing of transition from vegetative to reproductive phase	2	0.015465035	1.818	0.05	Biological Process	GO:0048510	regulation of timing of transition from vegetative to reproductive phase	0.015465035	0.096259932	0	0	2	40
GO:0042445 hormone metabolic process	5	0.015798863	4.545	0.016	Biological Process	GO:0042445	hormone metabolic process	0.015798863	0.097202551	0	0	5	308
GO:0017144 drug metabolic process	9	0.015867163	8.182	0.011	Biological Process	GO:0017144	drug metabolic process	0.015867163	0.097202551	0	0	9	818
GO:0034660 ncRNA metabolic process	7	0.015916793	6.364	0.013	Biological Process	GO:0034660	ncRNA metabolic process	0.015916793	0.097202551	0	0	7	550
GO:0009533 chloroplast stromal thylakoid	1	0.048409216	0.87	0.111	Cellular Component	GO:0009533	chloroplast stromal thylakoid	0.048409216	0.097285912	0	0	1	9
GO:0009539 photosystem II reaction center	1	0.048409216	0.87	0.111	Cellular Component	GO:0009539	photosystem II reaction center	0.048409216	0.097285912	0	0	1	9
GO:0016363 nuclear matrix	1	0.048409216	0.87	0.111	Cellular Component	GO:0016363	nuclear matrix	0.048409216	0.097285912	0	0	1	9
GO:0005747 mitochondrial respiratory chain complex I	2	0.04842867	1.739	0.031	Cellular Component	GO:0005747	mitochondrial respiratory chain complex I	0.04842867	0.097285912	0	0	2	64
GO:0045271 respiratory chain complex I	2	0.04842867	1.739	0.031	Cellular Component	GO:0045271	respiratory chain complex I	0.04842867	0.097285912	0	0	2	64
GO:0016020 membrane	62	0.050870319	53.913	0.006	Cellular Component	GO:0016020	membrane	0.050870319	0.100999114	0	0	62	9599
GO:0030964 NADH dehydrogenase complex	2	0.051166952	1.739	0.03	Cellular Component	GO:0030964	NADH dehydrogenase complex	0.051166952	0.100999114	0	0	2	66
GO:0071704 organic substance metabolic process	68	0.016690315	61.818	0.006	Biological Process	GO:0071704	organic substance metabolic process	0.016690315	0.101289349	0	0	68	11894
GO:0080030 methyl indole-3-acetate esterase activity	2	0.013327969	1.869	0.057	Molecular Function	GO:0080030	methyl indole-3-acetate esterase activity	0.013327969	0.101869764	0	0	2	35
GO:0015075 ion transmembrane transporter activity	8	0.013336268	7.477	0.013	Molecular Function	GO:0015075	ion transmembrane transporter activity	0.013336268	0.101869764	0	0	8	624
GO:0004616 phosphogluconate dehydrogenase (decarboxylating) activity	1	0.014980848	0.935	0.333	Molecular Function	GO:0004616	phosphogluconate dehydrogenase (decarboxylating) activity	0.014980848	0.101869764	0	0	1	3
GO:0004821 histidine-tRNA ligase activity	1	0.014980848	0.935	0.333	Molecular Function	GO:0004821	histidine-tRNA ligase activity	0.014980848	0.101869764	0	0	1	3
GO:0005047 signal recognition particle binding	1	0.014980848	0.935	0.333	Molecular Function	GO:0005047	signal recognition particle binding	0.014980848	0.101869764	0	0	1	3
GO:0019779 Atg8 activating enzyme activity	1	0.014980848	0.935	0.333	Molecular Function	GO:0019779	Atg8 activating enzyme activity	0.014980848	0.101869764	0	0	1	3
GO:0080109 indole-3-acetonitrile nitrile hydratase activity	1	0.014980848	0.935	0.333	Molecular Function	GO:0080109	indole-3-acetonitrile nitrile hydratase activity	0.014980848	0.101869764	0	0	1	3
GO:0031974 membrane-enclosed lumen	13	0.053426845	11.304	0.009	Cellular Component	GO:0031974	membrane-enclosed lumen	0.053426845	0.10277876	0	0	13	1443
GO:0043233 organelle lumen	13	0.053426845	11.304	0.009	Cellular Component	GO:0043233	organelle lumen	0.053426845	0.10277876	0	0	13	1443
GO:0070013 intracellular organelle lumen	13	0.053426845	11.304	0.009	Cellular Component	GO:0070013	intracellular organelle lumen	0.053426845	0.10277876	0	0	13	1443
GO:0042273 ribosomal large subunit biogenesis	3	0.017068762	2.727	0.026	Biological Process	GO:0042273	ribosomal large subunit biogenesis	0.017068762	0.10294266	0	0	3	114
GO:0070925 organelle assembly	4	0.017360187	3.636	0.019	Biological Process	GO:0070925	organelle assembly	0.017360187	0.104053963	0	0	4	208
GO:0000785 chromatin	4	0.054800258	3.478	0.015	Cellular Component	GO:0000785	chromatin	0.054800258	0.104534946	0	0	4	259
GO:0031072 heat shock protein binding	2	0.019709152	1.869	0.047	Molecular Function	GO:0031072	heat shock protein binding	0.019709152	0.10670556	0	0	2	43
GO:0016830 carbon-carbon lyase activity	3	0.019768179	2.804	0.026	Molecular Function	GO:0016830	carbon-carbon lyase activity	0.019768179	0.10670556	0	0	3	114
GO:0000257 nitrilase activity	1	0.019924888	0.935	0.25	Molecular Function	GO:0000257	nitrilase activity	0.019924888	0.10670556	0	0	1	4
GO:0004034 aldose 1-epimerase activity	1	0.019924888	0.935	0.25	Molecular Function	GO:0004034	aldose 1-epimerase activity	0.019924888	0.10670556	0	0	1	4
GO:0004324 ferredoxin-NADP+ reductase activity	1	0.019924888	0.935	0.25	Molecular Function	GO:0004324	ferredoxin-NADP+ reductase activity	0.019924888	0.10670556	0	0	1	4
GO:0004473 malate dehydrogenase (decarboxylating) (NADP+) activity	1	0.019924888	0.935	0.25	Molecular Function	GO:0004473	malate dehydrogenase (decarboxylating) (NADP+) activity	0.019924888	0.10670556	0	0	1	4
GO:0004737 pyruvate decarboxylase activity	1	0.019924888	0.935	0.25	Molecular Function	GO:0004737	pyruvate decarboxylase activity	0.019924888	0.10670556	0	0	1	4
GO:0005483 soluble NSF attachment protein activity	1	0.019924888	0.935	0.25	Molecular Function	GO:0005483	soluble NSF attachment protein activity	0.019924888	0.10670556	0	0	1	4
GO:0016815 hydrolase activity, acting on carbon-nitrogen (but not peptide) bonds, in nitriles	1	0.019924888	0.935	0.25	Molecular Function	GO:0016815	hydrolase activity, acting on carbon-nitrogen (but not peptide) bonds, in nitriles	0.019924888	0.10670556	0	0	1	4
GO:0018822 nitrile hydratase activity	1	0.019924888	0.935	0.25	Molecular Function	GO:0018822	nitrile hydratase activity	0.019924888	0.10670556	0	0	1	4
GO:0047427 cyanoalanine nitrilase activity	1	0.019924888	0.935	0.25	Molecular Function	GO:0047427	cyanoalanine nitrilase activity	0.019924888	0.10670556	0	0	1	4
GO:0080061 indole-3-acetonitrile nitrilase activity	1	0.019924888	0.935	0.25	Molecular Function	GO:0080061	indole-3-acetonitrile nitrilase activity	0.019924888	0.10670556	0	0	1	4
GO:0033218 amide binding	3	0.020225237	2.804	0.026	Molecular Function	GO:0033218	amide binding	0.020225237	0.10670556	0	0	3	115
GO:0006501 C-terminal protein lipidation	1	0.018840332	0.909	0.25	Biological Process	GO:0006501	C-terminal protein lipidation	0.018840332	0.108892631	0	0	1	4
GO:0006850 mitochondrial pyruvate transmembrane transport	1	0.018840332	0.909	0.25	Biological Process	GO:0006850	mitochondrial pyruvate transmembrane transport	0.018840332	0.108892631	0	0	1	4
GO:0009769 photosynthesis, light harvesting in photosystem II	1	0.018840332	0.909	0.25	Biological Process	GO:0009769	photosynthesis, light harvesting in photosystem II	0.018840332	0.108892631	0	0	1	4
GO:0042178 xenobiotic catabolic process	1	0.018840332	0.909	0.25	Biological Process	GO:0042178	xenobiotic catabolic process	0.018840332	0.108892631	0	0	1	4
GO:0046176 aldonic acid catabolic process	1	0.018840332	0.909	0.25	Biological Process	GO:0046176	aldonic acid catabolic process	0.018840332	0.108892631	0	0	1	4
GO:0046177 D-gluconate catabolic process	1	0.018840332	0.909	0.25	Biological Process	GO:0046177	D-gluconate catabolic process	0.018840332	0.108892631	0	0	1	4
GO:0005786 signal recognition particle, endoplasmic reticulum targeting	1	0.058847228	0.87	0.091	Cellular Component	GO:0005786	signal recognition particle, endoplasmic reticulum targeting	0.058847228	0.110399344	0	0	1	11
GO:0009368 endopeptidase Clp complex	1	0.058847228	0.87	0.091	Cellular Component	GO:0009368	endopeptidase Clp complex	0.058847228	0.110399344	0	0	1	11
GO:0046906 tetrapyrrole binding	6	0.021792927	5.607	0.014	Molecular Function	GO:0046906	tetrapyrrole binding	0.021792927	0.111799546	0	0	6	432
GO:0015077 monovalent inorganic cation transmembrane transporter activity	4	0.022500525	3.738	0.019	Molecular Function	GO:0015077	monovalent inorganic cation transmembrane transporter activity	0.022500525	0.111799546	0	0	4	213
GO:0036442 proton-exporting ATPase activity	2	0.023290877	1.869	0.043	Molecular Function	GO:0036442	proton-exporting ATPase activity	0.023290877	0.111799546	0	0	2	47
GO:0044769 ATPase activity, coupled to transmembrane movement of ions, rotational mechanism	2	0.024225103	1.869	0.042	Molecular Function	GO:0044769	ATPase activity, coupled to transmembrane movement of ions, rotational mechanism	0.024225103	0.111799546	0	0	2	48
GO:0003988 acetyl-CoA C-acyltransferase activity	1	0.024844344	0.935	0.2	Molecular Function	GO:0003988	acetyl-CoA C-acyltransferase activity	0.024844344	0.111799546	0	0	1	5
GO:0003999 adenine phosphoribosyltransferase activity	1	0.024844344	0.935	0.2	Molecular Function	GO:0003999	adenine phosphoribosyltransferase activity	0.024844344	0.111799546	0	0	1	5
GO:0009001 serine O-acetyltransferase activity	1	0.024844344	0.935	0.2	Molecular Function	GO:0009001	serine O-acetyltransferase activity	0.024844344	0.111799546	0	0	1	5
GO:0016412 serine O-acyltransferase activity	1	0.024844344	0.935	0.2	Molecular Function	GO:0016412	serine O-acyltransferase activity	0.024844344	0.111799546	0	0	1	5
GO:0016731 oxidoreductase activity, acting on iron-sulfur proteins as donors, NAD or NADP as acceptor	1	0.024844344	0.935	0.2	Molecular Function	GO:0016731	oxidoreductase activity, acting on iron-sulfur proteins as donors, NAD or NADP as acceptor	0.024844344	0.111799546	0	0	1	5
GO:0030942 endoplasmic reticulum signal peptide binding	1	0.024844344	0.935	0.2	Molecular Function	GO:0030942	endoplasmic reticulum signal peptide binding	0.024844344	0.111799546	0	0	1	5
GO:0034470 ncRNA processing	6	0.020421524	5.455	0.013	Biological Process	GO:0034470	ncRNA processing	0.020421524	0.117333136	0	0	6	450
GO:0000470 maturation of LSU-rRNA	2	0.020978223	1.818	0.043	Biological Process	GO:0000470	maturation of LSU-rRNA	0.020978223	0.119121954	0	0	2	47
GO:0006334 nucleosome assembly	2	0.020978223	1.818	0.043	Biological Process	GO:0006334	nucleosome assembly	0.020978223	0.119121954	0	0	2	47
GO:0010168 ER body	1	0.06402359	0.87	0.083	Cellular Component	GO:0010168	ER body	0.06402359	0.119125861	0	0	1	12
GO:0019637 organophosphate metabolic process	8	0.02151591	7.273	0.011	Biological Process	GO:0019637	organophosphate metabolic process	0.02151591	0.121153593	0	0	8	721
GO:0051084 'de novo' posttranslational protein folding	2	0.021823461	1.818	0.042	Biological Process	GO:0051084	'de novo' posttranslational protein folding	0.021823461	0.121153593	0	0	2	48
GO:0051085 chaperone cofactor-dependent protein refolding	2	0.021823461	1.818	0.042	Biological Process	GO:0051085	chaperone cofactor-dependent protein refolding	0.021823461	0.121153593	0	0	2	48
GO:0034641 cellular nitrogen compound metabolic process	39	0.021971991	35.455	0.006	Biological Process	GO:0034641	cellular nitrogen compound metabolic process	0.021971991	0.121153593	0	0	39	6114
GO:0055085 transmembrane transport	12	0.022515145	10.909	0.009	Biological Process	GO:0055085	transmembrane transport	0.022515145	0.121153593	0	0	12	1319
GO:0006807 nitrogen compound metabolic process	58	0.023249946	52.727	0.006	Biological Process	GO:0006807	nitrogen compound metabolic process	0.023249946	0.121153593	0	0	58	9939
GO:0009852 auxin catabolic process	1	0.023495191	0.909	0.2	Biological Process	GO:0009852	auxin catabolic process	0.023495191	0.121153593	0	0	1	5
GO:0016237 lysosomal microautophagy	1	0.023495191	0.909	0.2	Biological Process	GO:0016237	lysosomal microautophagy	0.023495191	0.121153593	0	0	1	5
GO:0019388 galactose catabolic process	1	0.023495191	0.909	0.2	Biological Process	GO:0019388	galactose catabolic process	0.023495191	0.121153593	0	0	1	5
GO:0019520 aldonic acid metabolic process	1	0.023495191	0.909	0.2	Biological Process	GO:0019520	aldonic acid metabolic process	0.023495191	0.121153593	0	0	1	5
GO:0019521 D-gluconate metabolic process	1	0.023495191	0.909	0.2	Biological Process	GO:0019521	D-gluconate metabolic process	0.023495191	0.121153593	0	0	1	5
GO:0033499 galactose catabolic process via UDP-galactose	1	0.023495191	0.909	0.2	Biological Process	GO:0033499	galactose catabolic process via UDP-galactose	0.023495191	0.121153593	0	0	1	5
GO:0034727 piecemeal microautophagy of the nucleus	1	0.023495191	0.909	0.2	Biological Process	GO:0034727	piecemeal microautophagy of the nucleus	0.023495191	0.121153593	0	0	1	5
GO:0051410 detoxification of nitrogen compound	1	0.023495191	0.909	0.2	Biological Process	GO:0051410	detoxification of nitrogen compound	0.023495191	0.121153593	0	0	1	5
GO:0140021 mitochondrial ADP transmembrane transport	1	0.023495191	0.909	0.2	Biological Process	GO:0140021	mitochondrial ADP transmembrane transport	0.023495191	0.121153593	0	0	1	5
GO:1990544 mitochondrial ATP transmembrane transport	1	0.023495191	0.909	0.2	Biological Process	GO:1990544	mitochondrial ATP transmembrane transport	0.023495191	0.121153593	0	0	1	5
GO:0006458 'de novo' protein folding	2	0.023555654	1.818	0.04	Biological Process	GO:0006458	'de novo' protein folding	0.023555654	0.121153593	0	0	2	50
GO:0046496 nicotinamide nucleotide metabolic process	3	0.023581904	2.727	0.023	Biological Process	GO:0046496	nicotinamide nucleotide metabolic process	0.023581904	0.121153593	0	0	3	129
GO:0010228 vegetative to reproductive phase transition of meristem	4	0.023732425	3.636	0.017	Biological Process	GO:0010228	vegetative to reproductive phase transition of meristem	0.023732425	0.121285183	0	0	4	229
GO:0006996 organelle organization	16	0.024157351	14.545	0.008	Biological Process	GO:0006996	organelle organization	0.024157351	0.122810406	0	0	16	1977
GO:0019362 pyridine nucleotide metabolic process	3	0.024538548	2.727	0.023	Biological Process	GO:0019362	pyridine nucleotide metabolic process	0.024538548	0.124098594	0	0	3	131
GO:0005779 integral component of peroxisomal membrane	1	0.069171729	0.87	0.077	Cellular Component	GO:0005779	integral component of peroxisomal membrane	0.069171729	0.124618909	0	0	1	13
GO:0009514 glyoxysome	1	0.069171729	0.87	0.077	Cellular Component	GO:0009514	glyoxysome	0.069171729	0.124618909	0	0	1	13
GO:0031231 intrinsic component of peroxisomal membrane	1	0.069171729	0.87	0.077	Cellular Component	GO:0031231	intrinsic component of peroxisomal membrane	0.069171729	0.124618909	0	0	1	13
GO:0048500 signal recognition particle	1	0.069171729	0.87	0.077	Cellular Component	GO:0048500	signal recognition particle	0.069171729	0.124618909	0	0	1	13
GO:0046982 protein heterodimerization activity	3	0.028328416	2.804	0.023	Molecular Function	GO:0046982	protein heterodimerization activity	0.028328416	0.124660778	0	0	3	131
GO:0050897 cobalt ion binding	2	0.029120318	1.869	0.038	Molecular Function	GO:0050897	cobalt ion binding	0.029120318	0.124660778	0	0	2	53
GO:0016004 phospholipase activator activity	1	0.029739336	0.935	0.167	Molecular Function	GO:0016004	phospholipase activator activity	0.029739336	0.124660778	0	0	1	6
GO:0060229 lipase activator activity	1	0.029739336	0.935	0.167	Molecular Function	GO:0060229	lipase activator activity	0.029739336	0.124660778	0	0	1	6
GO:0106130 purine phosphoribosyltransferase activity	1	0.029739336	0.935	0.167	Molecular Function	GO:0106130	purine phosphoribosyltransferase activity	0.029739336	0.124660778	0	0	1	6
GO:0009737 response to abscisic acid	7	0.024856766	6.364	0.012	Biological Process	GO:0009737	response to abscisic acid	0.024856766	0.12505658	0	0	7	603
GO:0019725 cellular homeostasis	4	0.025087073	3.636	0.017	Biological Process	GO:0019725	cellular homeostasis	0.025087073	0.125444735	0	0	4	233
GO:0065008 regulation of biological quality	11	0.0251923	10	0.009	Biological Process	GO:0065008	regulation of biological quality	0.0251923	0.125444735	0	0	11	1186
GO:0031497 chromatin assembly	2	0.025342482	1.818	0.038	Biological Process	GO:0031497	chromatin assembly	0.025342482	0.125548727	0	0	2	52
GO:0097305 response to alcohol	7	0.026252126	6.364	0.011	Biological Process	GO:0097305	response to alcohol	0.026252126	0.127628266	0	0	7	610
GO:0040034 regulation of development, heterochronic	2	0.026256019	1.818	0.038	Biological Process	GO:0040034	regulation of development, heterochronic	0.026256019	0.127628266	0	0	2	53
GO:0072330 monocarboxylic acid biosynthetic process	5	0.026314868	4.545	0.014	Biological Process	GO:0072330	monocarboxylic acid biosynthetic process	0.026314868	0.127628266	0	0	5	352
GO:0006006 glucose metabolic process	2	0.027182778	1.818	0.037	Biological Process	GO:0006006	glucose metabolic process	0.027182778	0.127628266	0	0	2	54
GO:0044262 cellular carbohydrate metabolic process	6	0.027901921	5.455	0.012	Biological Process	GO:0044262	cellular carbohydrate metabolic process	0.027901921	0.127628266	0	0	6	484
GO:0030003 cellular cation homeostasis	3	0.028050162	2.727	0.022	Biological Process	GO:0030003	cellular cation homeostasis	0.028050162	0.127628266	0	0	3	138
GO:0000447 endonucleolytic cleavage in ITS1 to separate SSU-rRNA from 5.8S rRNA and LSU-rRNA from tricistronic rRNA transcript (SSU-rRNA, 5.8S rRNA, LSU-rRNA)	1	0.028128166	0.909	0.167	Biological Process	GO:0000447	endonucleolytic cleavage in ITS1 to separate SSU-rRNA from 5.8S rRNA and LSU-rRNA from tricistronic rRNA transcript (SSU-rRNA, 5.8S rRNA, LSU-rRNA)	0.028128166	0.127628266	0	0	1	6
GO:0006168 adenine salvage	1	0.028128166	0.909	0.167	Biological Process	GO:0006168	adenine salvage	0.028128166	0.127628266	0	0	1	6
GO:0006805 xenobiotic metabolic process	1	0.028128166	0.909	0.167	Biological Process	GO:0006805	xenobiotic metabolic process	0.028128166	0.127628266	0	0	1	6
GO:0006848 pyruvate transport	1	0.028128166	0.909	0.167	Biological Process	GO:0006848	pyruvate transport	0.028128166	0.127628266	0	0	1	6
GO:0018410 C-terminal protein amino acid modification	1	0.028128166	0.909	0.167	Biological Process	GO:0018410	C-terminal protein amino acid modification	0.028128166	0.127628266	0	0	1	6
GO:0019405 alditol catabolic process	1	0.028128166	0.909	0.167	Biological Process	GO:0019405	alditol catabolic process	0.028128166	0.127628266	0	0	1	6
GO:0019563 glycerol catabolic process	1	0.028128166	0.909	0.167	Biological Process	GO:0019563	glycerol catabolic process	0.028128166	0.127628266	0	0	1	6
GO:0033319 UDP-D-xylose metabolic process	1	0.028128166	0.909	0.167	Biological Process	GO:0033319	UDP-D-xylose metabolic process	0.028128166	0.127628266	0	0	1	6
GO:0033320 UDP-D-xylose biosynthetic process	1	0.028128166	0.909	0.167	Biological Process	GO:0033320	UDP-D-xylose biosynthetic process	0.028128166	0.127628266	0	0	1	6
GO:0043096 purine nucleobase salvage	1	0.028128166	0.909	0.167	Biological Process	GO:0043096	purine nucleobase salvage	0.028128166	0.127628266	0	0	1	6
GO:0080141 regulation of jasmonic acid biosynthetic process	1	0.028128166	0.909	0.167	Biological Process	GO:0080141	regulation of jasmonic acid biosynthetic process	0.028128166	0.127628266	0	0	1	6
GO:1901475 pyruvate transmembrane transport	1	0.028128166	0.909	0.167	Biological Process	GO:1901475	pyruvate transmembrane transport	0.028128166	0.127628266	0	0	1	6
GO:0009648 photoperiodism	3	0.02910006	2.727	0.021	Biological Process	GO:0009648	photoperiodism	0.02910006	0.131423994	0	0	3	140
GO:0031982 vesicle	9	0.073568198	7.826	0.01	Cellular Component	GO:0031982	vesicle	0.073568198	0.131495913	0	0	9	938
GO:0033179 proton-transporting V-type ATPase, V0 domain	1	0.074291797	0.87	0.071	Cellular Component	GO:0033179	proton-transporting V-type ATPase, V0 domain	0.074291797	0.131751858	0	0	1	14
GO:0004470 malic enzyme activity	1	0.034609985	0.935	0.143	Molecular Function	GO:0004470	malic enzyme activity	0.034609985	0.134065313	0	0	1	7
GO:0004471 malate dehydrogenase (decarboxylating) (NAD+) activity	1	0.034609985	0.935	0.143	Molecular Function	GO:0004471	malate dehydrogenase (decarboxylating) (NAD+) activity	0.034609985	0.134065313	0	0	1	7
GO:0004791 thioredoxin-disulfide reductase activity	1	0.034609985	0.935	0.143	Molecular Function	GO:0004791	thioredoxin-disulfide reductase activity	0.034609985	0.134065313	0	0	1	7
GO:0008878 glucose-1-phosphate adenylyltransferase activity	1	0.034609985	0.935	0.143	Molecular Function	GO:0008878	glucose-1-phosphate adenylyltransferase activity	0.034609985	0.134065313	0	0	1	7
GO:0008948 oxaloacetate decarboxylase activity	1	0.034609985	0.935	0.143	Molecular Function	GO:0008948	oxaloacetate decarboxylase activity	0.034609985	0.134065313	0	0	1	7
GO:0005488 binding	83	0.034611633	77.57	0.006	Molecular Function	GO:0005488	binding	0.034611633	0.134065313	0	0	83	14747
GO:0034754 cellular hormone metabolic process	2	0.030040954	1.818	0.035	Biological Process	GO:0034754	cellular hormone metabolic process	0.030040954	0.13500302	0	0	2	57
GO:0072524 pyridine-containing compound metabolic process	3	0.030170603	2.727	0.021	Biological Process	GO:0072524	pyridine-containing compound metabolic process	0.030170603	0.13500302	0	0	3	142
GO:0019843 rRNA binding	3	0.036002353	2.804	0.021	Molecular Function	GO:0019843	rRNA binding	0.036002353	0.137709002	0	0	3	144
GO:0044282 small molecule catabolic process	4	0.031754767	3.636	0.016	Biological Process	GO:0044282	small molecule catabolic process	0.031754767	0.141288523	0	0	4	251
GO:0043687 post-translational protein modification	1	0.032739359	0.909	0.143	Biological Process	GO:0043687	post-translational protein modification	0.032739359	0.141288523	0	0	1	7
GO:0044209 AMP salvage	1	0.032739359	0.909	0.143	Biological Process	GO:0044209	AMP salvage	0.032739359	0.141288523	0	0	1	7
GO:0044375 regulation of peroxisome size	1	0.032739359	0.909	0.143	Biological Process	GO:0044375	regulation of peroxisome size	0.032739359	0.141288523	0	0	1	7
GO:0046083 adenine metabolic process	1	0.032739359	0.909	0.143	Biological Process	GO:0046083	adenine metabolic process	0.032739359	0.141288523	0	0	1	7
GO:0046084 adenine biosynthetic process	1	0.032739359	0.909	0.143	Biological Process	GO:0046084	adenine biosynthetic process	0.032739359	0.141288523	0	0	1	7
GO:0080140 regulation of jasmonic acid metabolic process	1	0.032739359	0.909	0.143	Biological Process	GO:0080140	regulation of jasmonic acid metabolic process	0.032739359	0.141288523	0	0	1	7
GO:1903428 positive regulation of reactive oxygen species biosynthetic process	1	0.032739359	0.909	0.143	Biological Process	GO:1903428	positive regulation of reactive oxygen species biosynthetic process	0.032739359	0.141288523	0	0	1	7
GO:0009644 response to high light intensity	2	0.03301302	1.818	0.033	Biological Process	GO:0009644	response to high light intensity	0.03301302	0.141839127	0	0	2	60
GO:0005783 endoplasmic reticulum	11	0.080835858	9.565	0.009	Cellular Component	GO:0005783	endoplasmic reticulum	0.080835858	0.142246045	0	0	11	1245
GO:0005471 ATP:ADP antiporter activity	1	0.039456412	0.935	0.125	Molecular Function	GO:0005471	ATP:ADP antiporter activity	0.039456412	0.145465807	0	0	1	8
GO:0048027 mRNA 5'-UTR binding	1	0.039456412	0.935	0.125	Molecular Function	GO:0048027	mRNA 5'-UTR binding	0.039456412	0.145465807	0	0	1	8
GO:0048040 UDP-glucuronate decarboxylase activity	1	0.039456412	0.935	0.125	Molecular Function	GO:0048040	UDP-glucuronate decarboxylase activity	0.039456412	0.145465807	0	0	1	8
GO:0010411 xyloglucan metabolic process	2	0.03402837	1.818	0.033	Biological Process	GO:0010411	xyloglucan metabolic process	0.03402837	0.145557478	0	0	2	61
GO:0031901 early endosome membrane	1	0.084448324	0.87	0.062	Cellular Component	GO:0031901	early endosome membrane	0.084448324	0.146334118	0	0	1	16
GO:0035618 root hair	1	0.084448324	0.87	0.062	Cellular Component	GO:0035618	root hair	0.084448324	0.146334118	0	0	1	16
GO:0006873 cellular ion homeostasis	3	0.034658326	2.727	0.02	Biological Process	GO:0006873	cellular ion homeostasis	0.034658326	0.147601906	0	0	3	150
GO:0006333 chromatin assembly or disassembly	2	0.035055822	1.818	0.032	Biological Process	GO:0006333	chromatin assembly or disassembly	0.035055822	0.147996537	0	0	2	62
GO:0009853 photorespiration	2	0.035055822	1.818	0.032	Biological Process	GO:0009853	photorespiration	0.035055822	0.147996537	0	0	2	62
GO:0019748 secondary metabolic process	5	0.035914228	4.545	0.013	Biological Process	GO:0019748	secondary metabolic process	0.035914228	0.150964137	0	0	5	383
GO:0006733 oxidoreduction coenzyme metabolic process	3	0.037024763	2.727	0.019	Biological Process	GO:0006733	oxidoreduction coenzyme metabolic process	0.037024763	0.153586162	0	0	3	154
GO:0034728 nucleosome organization	2	0.037146493	1.818	0.031	Biological Process	GO:0034728	nucleosome organization	0.037146493	0.153586162	0	0	2	64
GO:0006166 purine ribonucleoside salvage	1	0.037328872	0.909	0.125	Biological Process	GO:0006166	purine ribonucleoside salvage	0.037328872	0.153586162	0	0	1	8
GO:0009920 cell plate formation involved in plant-type cell wall biogenesis	1	0.037328872	0.909	0.125	Biological Process	GO:0009920	cell plate formation involved in plant-type cell wall biogenesis	0.037328872	0.153586162	0	0	1	8
GO:0071466 cellular response to xenobiotic stimulus	1	0.037328872	0.909	0.125	Biological Process	GO:0071466	cellular response to xenobiotic stimulus	0.037328872	0.153586162	0	0	1	8
GO:0006575 cellular modified amino acid metabolic process	3	0.037629055	2.727	0.019	Biological Process	GO:0006575	cellular modified amino acid metabolic process	0.037629055	0.154167984	0	0	3	155
GO:0061077 chaperone-mediated protein folding	2	0.039283962	1.818	0.03	Biological Process	GO:0061077	chaperone-mediated protein folding	0.039283962	0.160271962	0	0	2	66
GO:0033993 response to lipid	8	0.039696153	7.273	0.01	Biological Process	GO:0033993	response to lipid	0.039696153	0.161276003	0	0	8	813
GO:0030976 thiamine pyrophosphate binding	1	0.044278734	0.935	0.111	Molecular Function	GO:0030976	thiamine pyrophosphate binding	0.044278734	0.161301104	0	0	1	9
GO:0098807 chloroplast thylakoid membrane protein complex	1	0.094494376	0.87	0.056	Cellular Component	GO:0098807	chloroplast thylakoid membrane protein complex	0.094494376	0.162501691	0	0	1	18
GO:0072329 monocarboxylic acid catabolic process	2	0.040369915	1.818	0.03	Biological Process	GO:0072329	monocarboxylic acid catabolic process	0.040369915	0.163329948	0	0	2	67
GO:0000302 response to reactive oxygen species	3	0.040726159	2.727	0.019	Biological Process	GO:0000302	response to reactive oxygen species	0.040726159	0.164087554	0	0	3	160
GO:0009772 photosynthetic electron transport in photosystem II	1	0.041896805	0.909	0.111	Biological Process	GO:0009772	photosynthetic electron transport in photosystem II	0.041896805	0.16566603	0	0	1	9
GO:0019320 hexose catabolic process	1	0.041896805	0.909	0.111	Biological Process	GO:0019320	hexose catabolic process	0.041896805	0.16566603	0	0	1	9
GO:0032261 purine nucleotide salvage	1	0.041896805	0.909	0.111	Biological Process	GO:0032261	purine nucleotide salvage	0.041896805	0.16566603	0	0	1	9
GO:0043101 purine-containing compound salvage	1	0.041896805	0.909	0.111	Biological Process	GO:0043101	purine-containing compound salvage	0.041896805	0.16566603	0	0	1	9
GO:0034645 cellular macromolecule biosynthetic process	27	0.041971002	24.545	0.007	Biological Process	GO:0034645	cellular macromolecule biosynthetic process	0.041971002	0.16566603	0	0	27	4093
GO:0043436 oxoacid metabolic process	11	0.042458624	10	0.009	Biological Process	GO:0043436	oxoacid metabolic process	0.042458624	0.166912244	0	0	11	1290
GO:0006082 organic acid metabolic process	11	0.043054856	10	0.009	Biological Process	GO:0006082	organic acid metabolic process	0.043054856	0.168573651	0	0	11	1293
GO:0034399 nuclear periphery	1	0.099476346	0.87	0.053	Cellular Component	GO:0034399	nuclear periphery	0.099476346	0.169782936	0	0	1	19
GO:0031984 organelle subcompartment	14	0.10171709	12.174	0.008	Cellular Component	GO:0031984	organelle subcompartment	0.10171709	0.172311787	0	0	14	1757
GO:0008379 thioredoxin peroxidase activity	1	0.049077072	0.935	0.1	Molecular Function	GO:0008379	thioredoxin peroxidase activity	0.049077072	0.172615909	0	0	1	10
GO:0016730 oxidoreductase activity, acting on iron-sulfur proteins as donors	1	0.049077072	0.935	0.1	Molecular Function	GO:0016730	oxidoreductase activity, acting on iron-sulfur proteins as donors	0.049077072	0.172615909	0	0	1	10
GO:0051920 peroxiredoxin activity	1	0.049077072	0.935	0.1	Molecular Function	GO:0051920	peroxiredoxin activity	0.049077072	0.172615909	0	0	1	10
GO:0051186 cofactor metabolic process	7	0.044380289	6.364	0.01	Biological Process	GO:0051186	cofactor metabolic process	0.044380289	0.173065304	0	0	7	684
GO:0006323 DNA packaging	2	0.044825485	1.818	0.028	Biological Process	GO:0006323	DNA packaging	0.044825485	0.174102185	0	0	2	71
GO:0055065 metal ion homeostasis	3	0.045272048	2.727	0.018	Biological Process	GO:0055065	metal ion homeostasis	0.045272048	0.175136091	0	0	3	167
GO:0016765 transferase activity, transferring alkyl or aryl (other than methyl) groups	3	0.050416231	2.804	0.018	Molecular Function	GO:0016765	transferase activity, transferring alkyl or aryl (other than methyl) groups	0.050416231	0.175310986	0	0	3	165
GO:0005978 glycogen biosynthetic process	1	0.046443259	0.909	0.1	Biological Process	GO:0005978	glycogen biosynthetic process	0.046443259	0.176122754	0	0	1	10
GO:0006167 AMP biosynthetic process	1	0.046443259	0.909	0.1	Biological Process	GO:0006167	AMP biosynthetic process	0.046443259	0.176122754	0	0	1	10
GO:0019375 galactolipid biosynthetic process	1	0.046443259	0.909	0.1	Biological Process	GO:0019375	galactolipid biosynthetic process	0.046443259	0.176122754	0	0	1	10
GO:0042732 D-xylose metabolic process	1	0.046443259	0.909	0.1	Biological Process	GO:0042732	D-xylose metabolic process	0.046443259	0.176122754	0	0	1	10
GO:0043933 protein-containing complex subunit organization	8	0.046551492	7.273	0.01	Biological Process	GO:0043933	protein-containing complex subunit organization	0.046551492	0.176122754	0	0	8	840
GO:0006633 fatty acid biosynthetic process	3	0.046615394	2.727	0.018	Biological Process	GO:0006633	fatty acid biosynthetic process	0.046615394	0.176122754	0	0	3	169
GO:1990542 mitochondrial transmembrane transport	2	0.047118535	1.818	0.027	Biological Process	GO:1990542	mitochondrial transmembrane transport	0.047118535	0.177333712	0	0	2	73
GO:0022607 cellular component assembly	9	0.047519867	8.182	0.009	Biological Process	GO:0022607	cellular component assembly	0.047519867	0.178153632	0	0	9	997
GO:0005746 mitochondrial respiratory chain	2	0.106643513	1.739	0.02	Cellular Component	GO:0005746	mitochondrial respiratory chain	0.106643513	0.179319093	0	0	2	101
GO:0044275 cellular carbohydrate catabolic process	2	0.048280936	1.818	0.027	Biological Process	GO:0044275	cellular carbohydrate catabolic process	0.048280936	0.180310725	0	0	2	74
GO:0019752 carboxylic acid metabolic process	10	0.048634656	9.091	0.009	Biological Process	GO:0019752	carboxylic acid metabolic process	0.048634656	0.180935827	0	0	10	1159
GO:0000407 phagophore assembly site	1	0.109358915	0.87	0.048	Cellular Component	GO:0000407	phagophore assembly site	0.109358915	0.182532894	0	0	1	21
GO:0016408 C-acyltransferase activity	1	0.053851543	0.935	0.091	Molecular Function	GO:0016408	C-acyltransferase activity	0.053851543	0.183095247	0	0	1	11
GO:0045156 electron transporter, transferring electrons within the cyclic electron transport pathway of photosynthesis activity	1	0.053851543	0.935	0.091	Molecular Function	GO:0045156	electron transporter, transferring electrons within the cyclic electron transport pathway of photosynthesis activity	0.053851543	0.183095247	0	0	1	11
GO:0098803 respiratory chain complex	2	0.111940669	1.739	0.019	Cellular Component	GO:0098803	respiratory chain complex	0.111940669	0.185478334	0	0	2	104
GO:0010817 regulation of hormone levels	5	0.05072535	4.545	0.012	Biological Process	GO:0010817	regulation of hormone levels	0.05072535	0.186755668	0	0	5	422
GO:0000479 endonucleolytic cleavage of tricistronic rRNA transcript (SSU-rRNA, 5.8S rRNA, LSU-rRNA)	1	0.050968334	0.909	0.091	Biological Process	GO:0000479	endonucleolytic cleavage of tricistronic rRNA transcript (SSU-rRNA, 5.8S rRNA, LSU-rRNA)	0.050968334	0.186755668	0	0	1	11
GO:0009113 purine nucleobase biosynthetic process	1	0.050968334	0.909	0.091	Biological Process	GO:0009113	purine nucleobase biosynthetic process	0.050968334	0.186755668	0	0	1	11
GO:0046184 aldehyde biosynthetic process	1	0.050968334	0.909	0.091	Biological Process	GO:0046184	aldehyde biosynthetic process	0.050968334	0.186755668	0	0	1	11
GO:0009059 macromolecule biosynthetic process	27	0.051764365	24.545	0.006	Biological Process	GO:0009059	macromolecule biosynthetic process	0.051764365	0.188959393	0	0	27	4174
GO:0016209 antioxidant activity	3	0.058126409	2.804	0.017	Molecular Function	GO:0016209	antioxidant activity	0.058126409	0.19491623	0	0	3	175
GO:0008312 7S RNA binding	1	0.058602265	0.935	0.083	Molecular Function	GO:0008312	7S RNA binding	0.058602265	0.19491623	0	0	1	12
GO:0009056 catabolic process	14	0.054805191	12.727	0.008	Biological Process	GO:0009056	catabolic process	0.054805191	0.198027345	0	0	14	1850
GO:0009554 megasporogenesis	1	0.05547213	0.909	0.083	Biological Process	GO:0009554	megasporogenesis	0.05547213	0.198027345	0	0	1	12
GO:0009684 indoleacetic acid biosynthetic process	1	0.05547213	0.909	0.083	Biological Process	GO:0009684	indoleacetic acid biosynthetic process	0.05547213	0.198027345	0	0	1	12
GO:0016559 peroxisome fission	1	0.05547213	0.909	0.083	Biological Process	GO:0016559	peroxisome fission	0.05547213	0.198027345	0	0	1	12
GO:0046033 AMP metabolic process	1	0.05547213	0.909	0.083	Biological Process	GO:0046033	AMP metabolic process	0.05547213	0.198027345	0	0	1	12
GO:0050665 hydrogen peroxide biosynthetic process	1	0.05547213	0.909	0.083	Biological Process	GO:0050665	hydrogen peroxide biosynthetic process	0.05547213	0.198027345	0	0	1	12
GO:0055082 cellular chemical homeostasis	3	0.055820408	2.727	0.016	Biological Process	GO:0055082	cellular chemical homeostasis	0.055820408	0.19854072	0	0	3	182
GO:0044428 nuclear part	13	0.120964036	11.304	0.008	Cellular Component	GO:0044428	nuclear part	0.120964036	0.198977074	0	0	13	1653
GO:0098869 cellular oxidant detoxification	3	0.057308195	2.727	0.016	Biological Process	GO:0098869	cellular oxidant detoxification	0.057308195	0.203088529	0	0	3	184
GO:0006790 sulfur compound metabolic process	5	0.057703126	4.545	0.011	Biological Process	GO:0006790	sulfur compound metabolic process	0.057703126	0.20312119	0	0	5	438
GO:0044238 primary metabolic process	62	0.057797777	56.364	0.006	Biological Process	GO:0044238	primary metabolic process	0.057797777	0.20312119	0	0	62	11231
GO:0009850 auxin metabolic process	2	0.057944974	1.818	0.024	Biological Process	GO:0009850	auxin metabolic process	0.057944974	0.20312119	0	0	2	82
GO:0000478 endonucleolytic cleavage involved in rRNA processing	1	0.059954745	0.909	0.077	Biological Process	GO:0000478	endonucleolytic cleavage involved in rRNA processing	0.059954745	0.205710451	0	0	1	13
GO:0009410 response to xenobiotic stimulus	1	0.059954745	0.909	0.077	Biological Process	GO:0009410	response to xenobiotic stimulus	0.059954745	0.205710451	0	0	1	13
GO:0009683 indoleacetic acid metabolic process	1	0.059954745	0.909	0.077	Biological Process	GO:0009683	indoleacetic acid metabolic process	0.059954745	0.205710451	0	0	1	13
GO:0030026 cellular manganese ion homeostasis	1	0.059954745	0.909	0.077	Biological Process	GO:0030026	cellular manganese ion homeostasis	0.059954745	0.205710451	0	0	1	13
GO:1901679 nucleotide transmembrane transport	1	0.059954745	0.909	0.077	Biological Process	GO:1901679	nucleotide transmembrane transport	0.059954745	0.205710451	0	0	1	13
GO:2000379 positive regulation of reactive oxygen species metabolic process	1	0.059954745	0.909	0.077	Biological Process	GO:2000379	positive regulation of reactive oxygen species metabolic process	0.059954745	0.205710451	0	0	1	13
GO:0019751 polyol metabolic process	2	0.061728327	1.818	0.024	Biological Process	GO:0019751	polyol metabolic process	0.061728327	0.209191329	0	0	2	85
GO:0005996 monosaccharide metabolic process	3	0.061883648	2.727	0.016	Biological Process	GO:0005996	monosaccharide metabolic process	0.061883648	0.209191329	0	0	3	190
GO:0006810 transport	19	0.062177994	17.273	0.007	Biological Process	GO:0006810	transport	0.062177994	0.209191329	0	0	19	2769
GO:0010033 response to organic substance	15	0.06265472	13.636	0.007	Biological Process	GO:0010033	response to organic substance	0.06265472	0.209191329	0	0	15	2061
GO:0000919 cell plate assembly	1	0.064416279	0.909	0.071	Biological Process	GO:0000919	cell plate assembly	0.064416279	0.209191329	0	0	1	14
GO:0002182 cytoplasmic translational elongation	1	0.064416279	0.909	0.071	Biological Process	GO:0002182	cytoplasmic translational elongation	0.064416279	0.209191329	0	0	1	14
GO:0002221 pattern recognition receptor signaling pathway	1	0.064416279	0.909	0.071	Biological Process	GO:0002221	pattern recognition receptor signaling pathway	0.064416279	0.209191329	0	0	1	14
GO:0008535 respiratory chain complex IV assembly	1	0.064416279	0.909	0.071	Biological Process	GO:0008535	respiratory chain complex IV assembly	0.064416279	0.209191329	0	0	1	14
GO:0010196 nonphotochemical quenching	1	0.064416279	0.909	0.071	Biological Process	GO:0010196	nonphotochemical quenching	0.064416279	0.209191329	0	0	1	14
GO:0015866 ADP transport	1	0.064416279	0.909	0.071	Biological Process	GO:0015866	ADP transport	0.064416279	0.209191329	0	0	1	14
GO:0019374 galactolipid metabolic process	1	0.064416279	0.909	0.071	Biological Process	GO:0019374	galactolipid metabolic process	0.064416279	0.209191329	0	0	1	14
GO:0030104 water homeostasis	1	0.064416279	0.909	0.071	Biological Process	GO:0030104	water homeostasis	0.064416279	0.209191329	0	0	1	14
GO:0031125 rRNA 3'-end processing	1	0.064416279	0.909	0.071	Biological Process	GO:0031125	rRNA 3'-end processing	0.064416279	0.209191329	0	0	1	14
GO:0033617 mitochondrial respiratory chain complex IV assembly	1	0.064416279	0.909	0.071	Biological Process	GO:0033617	mitochondrial respiratory chain complex IV assembly	0.064416279	0.209191329	0	0	1	14
GO:0043174 nucleoside salvage	1	0.064416279	0.909	0.071	Biological Process	GO:0043174	nucleoside salvage	0.064416279	0.209191329	0	0	1	14
GO:1990066 energy quenching	1	0.064416279	0.909	0.071	Biological Process	GO:1990066	energy quenching	0.064416279	0.209191329	0	0	1	14
GO:0033176 proton-transporting V-type ATPase complex	1	0.128802649	0.87	0.04	Cellular Component	GO:0033176	proton-transporting V-type ATPase complex	0.128802649	0.210346772	0	0	1	25
GO:0051287 NAD binding	2	0.063949753	1.869	0.024	Molecular Function	GO:0051287	NAD binding	0.063949753	0.210415316	0	0	2	82
GO:0065003 protein-containing complex assembly	7	0.065026199	6.364	0.009	Biological Process	GO:0065003	protein-containing complex assembly	0.065026199	0.210468131	0	0	7	747
GO:0072593 reactive oxygen species metabolic process	3	0.066624537	2.727	0.015	Biological Process	GO:0072593	reactive oxygen species metabolic process	0.066624537	0.214294815	0	0	3	196
GO:1990748 cellular detoxification	3	0.068240973	2.727	0.015	Biological Process	GO:1990748	cellular detoxification	0.068240973	0.214294815	0	0	3	198
GO:0090407 organophosphate biosynthetic process	5	0.068656036	4.545	0.011	Biological Process	GO:0090407	organophosphate biosynthetic process	0.068656036	0.214294815	0	0	5	461
GO:0006535 cysteine biosynthetic process from serine	1	0.06885683	0.909	0.067	Biological Process	GO:0006535	cysteine biosynthetic process from serine	0.06885683	0.214294815	0	0	1	15
GO:0006880 intracellular sequestering of iron ion	1	0.06885683	0.909	0.067	Biological Process	GO:0006880	intracellular sequestering of iron ion	0.06885683	0.214294815	0	0	1	15
GO:0019430 removal of superoxide radicals	1	0.06885683	0.909	0.067	Biological Process	GO:0019430	removal of superoxide radicals	0.06885683	0.214294815	0	0	1	15
GO:0044804 autophagy of nucleus	1	0.06885683	0.909	0.067	Biological Process	GO:0044804	autophagy of nucleus	0.06885683	0.214294815	0	0	1	15
GO:0046365 monosaccharide catabolic process	1	0.06885683	0.909	0.067	Biological Process	GO:0046365	monosaccharide catabolic process	0.06885683	0.214294815	0	0	1	15
GO:0055071 manganese ion homeostasis	1	0.06885683	0.909	0.067	Biological Process	GO:0055071	manganese ion homeostasis	0.06885683	0.214294815	0	0	1	15
GO:0071450 cellular response to oxygen radical	1	0.06885683	0.909	0.067	Biological Process	GO:0071450	cellular response to oxygen radical	0.06885683	0.214294815	0	0	1	15
GO:0071451 cellular response to superoxide	1	0.06885683	0.909	0.067	Biological Process	GO:0071451	cellular response to superoxide	0.06885683	0.214294815	0	0	1	15
GO:1903426 regulation of reactive oxygen species biosynthetic process	1	0.06885683	0.909	0.067	Biological Process	GO:1903426	regulation of reactive oxygen species biosynthetic process	0.06885683	0.214294815	0	0	1	15
GO:0015217 ADP transmembrane transporter activity	1	0.068032929	0.935	0.071	Molecular Function	GO:0015217	ADP transmembrane transporter activity	0.068032929	0.214619344	0	0	1	14
GO:0019905 syntaxin binding	1	0.068032929	0.935	0.071	Molecular Function	GO:0019905	syntaxin binding	0.068032929	0.214619344	0	0	1	14
GO:0070181 small ribosomal subunit rRNA binding	1	0.068032929	0.935	0.071	Molecular Function	GO:0070181	small ribosomal subunit rRNA binding	0.068032929	0.214619344	0	0	1	14
GO:0070403 NAD+ binding	1	0.068032929	0.935	0.071	Molecular Function	GO:0070403	NAD+ binding	0.068032929	0.214619344	0	0	1	14
GO:0019829 cation-transporting ATPase activity	2	0.070899764	1.869	0.023	Molecular Function	GO:0019829	cation-transporting ATPase activity	0.070899764	0.216953277	0	0	2	87
GO:0022853 active ion transmembrane transporter activity	2	0.070899764	1.869	0.023	Molecular Function	GO:0022853	active ion transmembrane transporter activity	0.070899764	0.216953277	0	0	2	87
GO:0042625 ATPase coupled ion transmembrane transporter activity	2	0.070899764	1.869	0.023	Molecular Function	GO:0042625	ATPase coupled ion transmembrane transporter activity	0.070899764	0.216953277	0	0	2	87
GO:0003730 mRNA 3'-UTR binding	1	0.072713104	0.935	0.067	Molecular Function	GO:0003730	mRNA 3'-UTR binding	0.072713104	0.220299106	0	0	1	15
GO:0051234 establishment of localization	19	0.071309487	17.273	0.007	Biological Process	GO:0051234	establishment of localization	0.071309487	0.221218889	0	0	19	2817
GO:0006090 pyruvate metabolic process	2	0.072210132	1.818	0.022	Biological Process	GO:0006090	pyruvate metabolic process	0.072210132	0.223045384	0	0	2	93
GO:0006979 response to oxidative stress	5	0.073236531	4.545	0.011	Biological Process	GO:0006979	response to oxidative stress	0.073236531	0.223045384	0	0	5	470
GO:0009750 response to fructose	1	0.073276496	0.909	0.062	Biological Process	GO:0009750	response to fructose	0.073276496	0.223045384	0	0	1	16
GO:0015867 ATP transport	1	0.073276496	0.909	0.062	Biological Process	GO:0015867	ATP transport	0.073276496	0.223045384	0	0	1	16
GO:0034063 stress granule assembly	1	0.073276496	0.909	0.062	Biological Process	GO:0034063	stress granule assembly	0.073276496	0.223045384	0	0	1	16
GO:0097577 sequestering of iron ion	1	0.073276496	0.909	0.062	Biological Process	GO:0097577	sequestering of iron ion	0.073276496	0.223045384	0	0	1	16
GO:0044248 cellular catabolic process	12	0.074760809	10.909	0.008	Biological Process	GO:0044248	cellular catabolic process	0.074760809	0.226852329	0	0	12	1593
GO:1901659 glycosyl compound biosynthetic process	2	0.076279641	1.818	0.021	Biological Process	GO:1901659	glycosyl compound biosynthetic process	0.076279641	0.229947523	0	0	2	96
GO:0097237 cellular response to toxic substance	3	0.076587874	2.727	0.014	Biological Process	GO:0097237	cellular response to toxic substance	0.076587874	0.229947523	0	0	3	208
GO:0006839 mitochondrial transport	2	0.077652115	1.818	0.021	Biological Process	GO:0006839	mitochondrial transport	0.077652115	0.229947523	0	0	2	97
GO:0000303 response to superoxide	1	0.077675373	0.909	0.059	Biological Process	GO:0000303	response to superoxide	0.077675373	0.229947523	0	0	1	17
GO:0000305 response to oxygen radical	1	0.077675373	0.909	0.059	Biological Process	GO:0000305	response to oxygen radical	0.077675373	0.229947523	0	0	1	17
GO:0000422 autophagy of mitochondrion	1	0.077675373	0.909	0.059	Biological Process	GO:0000422	autophagy of mitochondrion	0.077675373	0.229947523	0	0	1	17
GO:0009269 response to desiccation	1	0.077675373	0.909	0.059	Biological Process	GO:0009269	response to desiccation	0.077675373	0.229947523	0	0	1	17
GO:0061726 mitochondrion disassembly	1	0.077675373	0.909	0.059	Biological Process	GO:0061726	mitochondrion disassembly	0.077675373	0.229947523	0	0	1	17
GO:0019439 aromatic compound catabolic process	4	0.07868838	3.636	0.012	Biological Process	GO:0019439	aromatic compound catabolic process	0.07868838	0.231844289	0	0	4	340
GO:0006414 translational elongation	2	0.079032399	1.818	0.02	Biological Process	GO:0006414	translational elongation	0.079032399	0.231844289	0	0	2	98
GO:0042255 ribosome assembly	2	0.079032399	1.818	0.02	Biological Process	GO:0042255	ribosome assembly	0.079032399	0.231844289	0	0	2	98
GO:0005347 ATP transmembrane transporter activity	1	0.077369994	0.935	0.062	Molecular Function	GO:0005347	ATP transmembrane transporter activity	0.077369994	0.232109981	0	0	1	16
GO:0006108 malate metabolic process	1	0.08205356	0.909	0.056	Biological Process	GO:0006108	malate metabolic process	0.08205356	0.237125019	0	0	1	18
GO:0006801 superoxide metabolic process	1	0.08205356	0.909	0.056	Biological Process	GO:0006801	superoxide metabolic process	0.08205356	0.237125019	0	0	1	18
GO:0042304 regulation of fatty acid biosynthetic process	1	0.08205356	0.909	0.056	Biological Process	GO:0042304	regulation of fatty acid biosynthetic process	0.08205356	0.237125019	0	0	1	18
GO:0072659 protein localization to plasma membrane	1	0.08205356	0.909	0.056	Biological Process	GO:0072659	protein localization to plasma membrane	0.08205356	0.237125019	0	0	1	18
GO:0098659 inorganic cation import across plasma membrane	1	0.08205356	0.909	0.056	Biological Process	GO:0098659	inorganic cation import across plasma membrane	0.08205356	0.237125019	0	0	1	18
GO:0022857 transmembrane transporter activity	10	0.079964497	9.346	0.008	Molecular Function	GO:0022857	transmembrane transporter activity	0.079964497	0.237564428	0	0	10	1203
GO:0044463 cell projection part	1	0.147825514	0.87	0.034	Cellular Component	GO:0044463	cell projection part	0.147825514	0.237988594	0	0	1	29
GO:0120038 plasma membrane bounded cell projection part	1	0.147825514	0.87	0.034	Cellular Component	GO:0120038	plasma membrane bounded cell projection part	0.147825514	0.237988594	0	0	1	29
GO:0008641 ubiquitin-like modifier activating enzyme activity	1	0.082003714	0.935	0.059	Molecular Function	GO:0008641	ubiquitin-like modifier activating enzyme activity	0.082003714	0.238982252	0	0	1	17
GO:0016615 malate dehydrogenase activity	1	0.082003714	0.935	0.059	Molecular Function	GO:0016615	malate dehydrogenase activity	0.082003714	0.238982252	0	0	1	17
GO:1901575 organic substance catabolic process	12	0.083543273	10.909	0.007	Biological Process	GO:1901575	organic substance catabolic process	0.083543273	0.240713704	0	0	12	1624
GO:0030001 metal ion transport	4	0.085379515	3.636	0.011	Biological Process	GO:0030001	metal ion transport	0.085379515	0.242500658	0	0	4	350
GO:1901361 organic cyclic compound catabolic process	4	0.086063587	3.636	0.011	Biological Process	GO:1901361	organic cyclic compound catabolic process	0.086063587	0.242500658	0	0	4	351
GO:0006144 purine nucleobase metabolic process	1	0.086411151	0.909	0.053	Biological Process	GO:0006144	purine nucleobase metabolic process	0.086411151	0.242500658	0	0	1	19
GO:0009612 response to mechanical stimulus	1	0.086411151	0.909	0.053	Biological Process	GO:0009612	response to mechanical stimulus	0.086411151	0.242500658	0	0	1	19
GO:0009969 xyloglucan biosynthetic process	1	0.086411151	0.909	0.053	Biological Process	GO:0009969	xyloglucan biosynthetic process	0.086411151	0.242500658	0	0	1	19
GO:0019321 pentose metabolic process	1	0.086411151	0.909	0.053	Biological Process	GO:0019321	pentose metabolic process	0.086411151	0.242500658	0	0	1	19
GO:0043173 nucleotide salvage	1	0.086411151	0.909	0.053	Biological Process	GO:0043173	nucleotide salvage	0.086411151	0.242500658	0	0	1	19
GO:0051238 sequestering of metal ion	1	0.086411151	0.909	0.053	Biological Process	GO:0051238	sequestering of metal ion	0.086411151	0.242500658	0	0	1	19
GO:0099587 inorganic ion import across plasma membrane	1	0.086411151	0.909	0.053	Biological Process	GO:0099587	inorganic ion import across plasma membrane	0.086411151	0.242500658	0	0	1	19
GO:0034622 cellular protein-containing complex assembly	6	0.086672927	5.455	0.009	Biological Process	GO:0034622	cellular protein-containing complex assembly	0.086672927	0.24253433	0	0	6	645
GO:0010494 cytoplasmic stress granule	1	0.152516533	0.87	0.033	Cellular Component	GO:0010494	cytoplasmic stress granule	0.152516533	0.243811641	0	0	1	30
GO:0034976 response to endoplasmic reticulum stress	2	0.087472405	1.818	0.019	Biological Process	GO:0034976	response to endoplasmic reticulum stress	0.087472405	0.244068119	0	0	2	104
GO:0055080 cation homeostasis	3	0.088987775	2.727	0.014	Biological Process	GO:0055080	cation homeostasis	0.088987775	0.247223022	0	0	3	222
GO:0009611 response to wounding	3	0.089904165	2.727	0.013	Biological Process	GO:0009611	response to wounding	0.089904165	0.247223022	0	0	3	223
GO:0005977 glycogen metabolic process	1	0.090748244	0.909	0.05	Biological Process	GO:0005977	glycogen metabolic process	0.090748244	0.247223022	0	0	1	20
GO:0006112 energy reserve metabolic process	1	0.090748244	0.909	0.05	Biological Process	GO:0006112	energy reserve metabolic process	0.090748244	0.247223022	0	0	1	20
GO:0010232 vascular transport	1	0.090748244	0.909	0.05	Biological Process	GO:0010232	vascular transport	0.090748244	0.247223022	0	0	1	20
GO:0010233 phloem transport	1	0.090748244	0.909	0.05	Biological Process	GO:0010233	phloem transport	0.090748244	0.247223022	0	0	1	20
GO:0033962 cytoplasmic mRNA processing body assembly	1	0.090748244	0.909	0.05	Biological Process	GO:0033962	cytoplasmic mRNA processing body assembly	0.090748244	0.247223022	0	0	1	20
GO:1990778 protein localization to cell periphery	1	0.090748244	0.909	0.05	Biological Process	GO:1990778	protein localization to cell periphery	0.090748244	0.247223022	0	0	1	20
GO:0016053 organic acid biosynthetic process	6	0.091149168	5.455	0.009	Biological Process	GO:0016053	organic acid biosynthetic process	0.091149168	0.247223022	0	0	6	654
GO:0046394 carboxylic acid biosynthetic process	6	0.091149168	5.455	0.009	Biological Process	GO:0046394	carboxylic acid biosynthetic process	0.091149168	0.247223022	0	0	6	654
GO:0080031 methyl salicylate esterase activity	1	0.086614379	0.935	0.056	Molecular Function	GO:0080031	methyl salicylate esterase activity	0.086614379	0.247700933	0	0	1	18
GO:0080032 methyl jasmonate esterase activity	1	0.086614379	0.935	0.056	Molecular Function	GO:0080032	methyl jasmonate esterase activity	0.086614379	0.247700933	0	0	1	18
GO:0070469 respiratory chain	2	0.156457828	1.739	0.016	Cellular Component	GO:0070469	respiratory chain	0.156457828	0.248363125	0	0	2	128
GO:0046873 metal ion transmembrane transporter activity	3	0.088135209	2.804	0.014	Molecular Function	GO:0046873	metal ion transmembrane transporter activity	0.088135209	0.249716426	0	0	3	209
GO:0042446 hormone biosynthetic process	3	0.092677165	2.727	0.013	Biological Process	GO:0042446	hormone biosynthetic process	0.092677165	0.250667206	0	0	3	226
GO:0042592 homeostatic process	5	0.093777432	4.545	0.01	Biological Process	GO:0042592	homeostatic process	0.093777432	0.252938574	0	0	5	507
GO:0022618 ribonucleoprotein complex assembly	3	0.094545487	2.727	0.013	Biological Process	GO:0022618	ribonucleoprotein complex assembly	0.094545487	0.253593544	0	0	3	228
GO:0031668 cellular response to extracellular stimulus	3	0.094545487	2.727	0.013	Biological Process	GO:0031668	cellular response to extracellular stimulus	0.094545487	0.253593544	0	0	3	228
GO:0010030 positive regulation of seed germination	1	0.095064933	0.909	0.048	Biological Process	GO:0010030	positive regulation of seed germination	0.095064933	0.253593544	0	0	1	21
GO:0015868 purine ribonucleotide transport	1	0.095064933	0.909	0.048	Biological Process	GO:0015868	purine ribonucleotide transport	0.095064933	0.253593544	0	0	1	21
GO:0051117 ATPase binding	1	0.091202102	0.935	0.053	Molecular Function	GO:0051117	ATPase binding	0.091202102	0.255754665	0	0	1	19
GO:0043168 anion binding	23	0.091937952	21.495	0.007	Molecular Function	GO:0043168	anion binding	0.091937952	0.255754665	0	0	23	3461
GO:0065004 protein-DNA complex assembly	2	0.09616823	1.818	0.018	Biological Process	GO:0065004	protein-DNA complex assembly	0.09616823	0.25583384	0	0	2	110
GO:0010410 hemicellulose metabolic process	2	0.099120073	1.818	0.018	Biological Process	GO:0010410	hemicellulose metabolic process	0.099120073	0.260756314	0	0	2	112
GO:0015770 sucrose transport	1	0.099361314	0.909	0.045	Biological Process	GO:0015770	sucrose transport	0.099361314	0.260756314	0	0	1	22
GO:0015865 purine nucleotide transport	1	0.099361314	0.909	0.045	Biological Process	GO:0015865	purine nucleotide transport	0.099361314	0.260756314	0	0	1	22
GO:0042447 hormone catabolic process	1	0.099361314	0.909	0.045	Biological Process	GO:0042447	hormone catabolic process	0.099361314	0.260756314	0	0	1	22
GO:0051503 adenine nucleotide transport	1	0.099361314	0.909	0.045	Biological Process	GO:0051503	adenine nucleotide transport	0.099361314	0.260756314	0	0	1	22
GO:0006396 RNA processing	8	0.099775992	7.273	0.008	Biological Process	GO:0006396	RNA processing	0.099775992	0.261138781	0	0	8	993
GO:0005215 transporter activity	10	0.095094898	9.346	0.008	Molecular Function	GO:0005215	transporter activity	0.095094898	0.261649113	0	0	10	1245
GO:0016861 intramolecular oxidoreductase activity, interconverting aldoses and ketoses	1	0.095766996	0.935	0.05	Molecular Function	GO:0016861	intramolecular oxidoreductase activity, interconverting aldoses and ketoses	0.095766996	0.261649113	0	0	1	20
GO:0071496 cellular response to external stimulus	3	0.100242995	2.727	0.013	Biological Process	GO:0071496	cellular response to external stimulus	0.100242995	0.261655773	0	0	3	234
GO:0009725 response to hormone	12	0.101343687	10.909	0.007	Biological Process	GO:0009725	response to hormone	0.101343687	0.263819625	0	0	12	1681
GO:0098771 inorganic ion homeostasis	3	0.102172459	2.727	0.013	Biological Process	GO:0098771	inorganic ion homeostasis	0.102172459	0.265265929	0	0	3	236
GO:0071826 ribonucleoprotein complex subunit organization	3	0.103142777	2.727	0.013	Biological Process	GO:0071826	ribonucleoprotein complex subunit organization	0.103142777	0.267071031	0	0	3	237
GO:0005346 purine ribonucleotide transmembrane transporter activity	1	0.100309174	0.935	0.048	Molecular Function	GO:0005346	purine ribonucleotide transmembrane transporter activity	0.100309174	0.26925094	0	0	1	21
GO:0051787 misfolded protein binding	1	0.100309174	0.935	0.048	Molecular Function	GO:0051787	misfolded protein binding	0.100309174	0.26925094	0	0	1	21
GO:0022411 cellular component disassembly	2	0.10509912	1.818	0.017	Biological Process	GO:0022411	cellular component disassembly	0.10509912	0.269317785	0	0	2	116
GO:0000466 maturation of 5.8S rRNA from tricistronic rRNA transcript (SSU-rRNA, 5.8S rRNA, LSU-rRNA)	1	0.107893531	0.909	0.042	Biological Process	GO:0000466	maturation of 5.8S rRNA from tricistronic rRNA transcript (SSU-rRNA, 5.8S rRNA, LSU-rRNA)	0.107893531	0.269317785	0	0	1	24
GO:0006026 aminoglycan catabolic process	1	0.107893531	0.909	0.042	Biological Process	GO:0006026	aminoglycan catabolic process	0.107893531	0.269317785	0	0	1	24
GO:0006030 chitin metabolic process	1	0.107893531	0.909	0.042	Biological Process	GO:0006030	chitin metabolic process	0.107893531	0.269317785	0	0	1	24
GO:0006032 chitin catabolic process	1	0.107893531	0.909	0.042	Biological Process	GO:0006032	chitin catabolic process	0.107893531	0.269317785	0	0	1	24
GO:0006613 cotranslational protein targeting to membrane	1	0.107893531	0.909	0.042	Biological Process	GO:0006613	cotranslational protein targeting to membrane	0.107893531	0.269317785	0	0	1	24
GO:0006614 SRP-dependent cotranslational protein targeting to membrane	1	0.107893531	0.909	0.042	Biological Process	GO:0006614	SRP-dependent cotranslational protein targeting to membrane	0.107893531	0.269317785	0	0	1	24
GO:0015766 disaccharide transport	1	0.107893531	0.909	0.042	Biological Process	GO:0015766	disaccharide transport	0.107893531	0.269317785	0	0	1	24
GO:0015772 oligosaccharide transport	1	0.107893531	0.909	0.042	Biological Process	GO:0015772	oligosaccharide transport	0.107893531	0.269317785	0	0	1	24
GO:0031408 oxylipin biosynthetic process	1	0.107893531	0.909	0.042	Biological Process	GO:0031408	oxylipin biosynthetic process	0.107893531	0.269317785	0	0	1	24
GO:0034755 iron ion transmembrane transport	1	0.107893531	0.909	0.042	Biological Process	GO:0034755	iron ion transmembrane transport	0.107893531	0.269317785	0	0	1	24
GO:0046348 amino sugar catabolic process	1	0.107893531	0.909	0.042	Biological Process	GO:0046348	amino sugar catabolic process	0.107893531	0.269317785	0	0	1	24
GO:0140115 export across plasma membrane	1	0.107893531	0.909	0.042	Biological Process	GO:0140115	export across plasma membrane	0.107893531	0.269317785	0	0	1	24
GO:1901072 glucosamine-containing compound catabolic process	1	0.107893531	0.909	0.042	Biological Process	GO:1901072	glucosamine-containing compound catabolic process	0.107893531	0.269317785	0	0	1	24
GO:0032580 Golgi cisterna membrane	1	0.171025991	0.87	0.029	Cellular Component	GO:0032580	Golgi cisterna membrane	0.171025991	0.269603473	0	0	1	34
GO:0000295 adenine nucleotide transmembrane transporter activity	1	0.104828747	0.935	0.045	Molecular Function	GO:0000295	adenine nucleotide transmembrane transporter activity	0.104828747	0.27184404	0	0	1	22
GO:0005381 iron ion transmembrane transporter activity	1	0.104828747	0.935	0.045	Molecular Function	GO:0005381	iron ion transmembrane transporter activity	0.104828747	0.27184404	0	0	1	22
GO:0008143 poly(A) binding	1	0.104828747	0.935	0.045	Molecular Function	GO:0008143	poly(A) binding	0.104828747	0.27184404	0	0	1	22
GO:0015216 purine nucleotide transmembrane transporter activity	1	0.104828747	0.935	0.045	Molecular Function	GO:0015216	purine nucleotide transmembrane transporter activity	0.104828747	0.27184404	0	0	1	22
GO:0044283 small molecule biosynthetic process	7	0.112113008	6.364	0.008	Biological Process	GO:0044283	small molecule biosynthetic process	0.112113008	0.275639992	0	0	7	855
GO:0009292 genetic transfer	1	0.112129554	0.909	0.04	Biological Process	GO:0009292	genetic transfer	0.112129554	0.275639992	0	0	1	25
GO:0009294 DNA mediated transformation	1	0.112129554	0.909	0.04	Biological Process	GO:0009294	DNA mediated transformation	0.112129554	0.275639992	0	0	1	25
GO:0019344 cysteine biosynthetic process	1	0.112129554	0.909	0.04	Biological Process	GO:0019344	cysteine biosynthetic process	0.112129554	0.275639992	0	0	1	25
GO:0042451 purine nucleoside biosynthetic process	1	0.112129554	0.909	0.04	Biological Process	GO:0042451	purine nucleoside biosynthetic process	0.112129554	0.275639992	0	0	1	25
GO:0046129 purine ribonucleoside biosynthetic process	1	0.112129554	0.909	0.04	Biological Process	GO:0046129	purine ribonucleoside biosynthetic process	0.112129554	0.275639992	0	0	1	25
GO:0046872 metal ion binding	25	0.108735219	23.364	0.006	Molecular Function	GO:0046872	metal ion binding	0.108735219	0.276476888	0	0	25	3893
GO:0008422 beta-glucosidase activity	2	0.108848198	1.869	0.018	Molecular Function	GO:0008422	beta-glucosidase activity	0.108848198	0.276476888	0	0	2	112
GO:0070717 poly-purine tract binding	1	0.109325828	0.935	0.043	Molecular Function	GO:0070717	poly-purine tract binding	0.109325828	0.276476888	0	0	1	23
GO:0009719 response to endogenous stimulus	12	0.113338496	10.909	0.007	Biological Process	GO:0009719	response to endogenous stimulus	0.113338496	0.277908282	0	0	12	1716
GO:0005975 carbohydrate metabolic process	9	0.114722307	8.182	0.008	Biological Process	GO:0005975	carbohydrate metabolic process	0.114722307	0.278942274	0	0	9	1196
GO:0006073 cellular glucan metabolic process	3	0.115068839	2.727	0.012	Biological Process	GO:0006073	cellular glucan metabolic process	0.115068839	0.278942274	0	0	3	249
GO:0006012 galactose metabolic process	1	0.116345645	0.909	0.038	Biological Process	GO:0006012	galactose metabolic process	0.116345645	0.278942274	0	0	1	26
GO:0006862 nucleotide transport	1	0.116345645	0.909	0.038	Biological Process	GO:0006862	nucleotide transport	0.116345645	0.278942274	0	0	1	26
GO:0009556 microsporogenesis	1	0.116345645	0.909	0.038	Biological Process	GO:0009556	microsporogenesis	0.116345645	0.278942274	0	0	1	26
GO:0019432 triglyceride biosynthetic process	1	0.116345645	0.909	0.038	Biological Process	GO:0019432	triglyceride biosynthetic process	0.116345645	0.278942274	0	0	1	26
GO:0031407 oxylipin metabolic process	1	0.116345645	0.909	0.038	Biological Process	GO:0031407	oxylipin metabolic process	0.116345645	0.278942274	0	0	1	26
GO:0044764 multi-organism cellular process	1	0.116345645	0.909	0.038	Biological Process	GO:0044764	multi-organism cellular process	0.116345645	0.278942274	0	0	1	26
GO:0098739 import across plasma membrane	1	0.116345645	0.909	0.038	Biological Process	GO:0098739	import across plasma membrane	0.116345645	0.278942274	0	0	1	26
GO:0010319 stromule	1	0.180129872	0.87	0.028	Cellular Component	GO:0010319	stromule	0.180129872	0.281996421	0	0	1	36
GO:0004568 chitinase activity	1	0.113800527	0.935	0.042	Molecular Function	GO:0004568	chitinase activity	0.113800527	0.283392887	0	0	1	24
GO:0043169 cation binding	25	0.113912827	23.364	0.006	Molecular Function	GO:0043169	cation binding	0.113912827	0.283392887	0	0	25	3914
GO:0055114 oxidation-reduction process	11	0.118883235	10	0.007	Biological Process	GO:0055114	oxidation-reduction process	0.118883235	0.284324189	0	0	11	1554
GO:0000469 cleavage involved in rRNA processing	1	0.120541897	0.909	0.037	Biological Process	GO:0000469	cleavage involved in rRNA processing	0.120541897	0.285478492	0	0	1	27
GO:0019217 regulation of fatty acid metabolic process	1	0.120541897	0.909	0.037	Biological Process	GO:0019217	regulation of fatty acid metabolic process	0.120541897	0.285478492	0	0	1	27
GO:0046174 polyol catabolic process	1	0.120541897	0.909	0.037	Biological Process	GO:0046174	polyol catabolic process	0.120541897	0.285478492	0	0	1	27
GO:0071421 manganese ion transmembrane transport	1	0.120541897	0.909	0.037	Biological Process	GO:0071421	manganese ion transmembrane transport	0.120541897	0.285478492	0	0	1	27
GO:0044042 glucan metabolic process	3	0.121219958	2.727	0.012	Biological Process	GO:0044042	glucan metabolic process	0.121219958	0.286385837	0	0	3	255
GO:0048573 photoperiodism, flowering	2	0.12201782	1.818	0.016	Biological Process	GO:0048573	photoperiodism, flowering	0.12201782	0.287571125	0	0	2	127
GO:0010467 gene expression	27	0.122700867	24.545	0.006	Biological Process	GO:0010467	gene expression	0.122700867	0.288480731	0	0	27	4562
GO:0015215 nucleotide transmembrane transporter activity	1	0.118252954	0.935	0.04	Molecular Function	GO:0015215	nucleotide transmembrane transporter activity	0.118252954	0.289483232	0	0	1	25
GO:0044183 protein binding involved in protein folding	1	0.118252954	0.935	0.04	Molecular Function	GO:0044183	protein binding involved in protein folding	0.118252954	0.289483232	0	0	1	25
GO:0051179 localization	19	0.123674304	17.273	0.006	Biological Process	GO:0051179	localization	0.123674304	0.290067027	0	0	19	3033
GO:0006022 aminoglycan metabolic process	1	0.124718402	0.909	0.036	Biological Process	GO:0006022	aminoglycan metabolic process	0.124718402	0.290411435	0	0	1	28
GO:0006094 gluconeogenesis	1	0.124718402	0.909	0.036	Biological Process	GO:0006094	gluconeogenesis	0.124718402	0.290411435	0	0	1	28
GO:0006828 manganese ion transport	1	0.124718402	0.909	0.036	Biological Process	GO:0006828	manganese ion transport	0.124718402	0.290411435	0	0	1	28
GO:0071824 protein-DNA complex subunit organization	2	0.126742425	1.818	0.015	Biological Process	GO:0071824	protein-DNA complex subunit organization	0.126742425	0.294418409	0	0	2	130
GO:0035265 organ growth	1	0.128875253	0.909	0.034	Biological Process	GO:0035265	organ growth	0.128875253	0.297239597	0	0	1	29
GO:0046460 neutral lipid biosynthetic process	1	0.128875253	0.909	0.034	Biological Process	GO:0046460	neutral lipid biosynthetic process	0.128875253	0.297239597	0	0	1	29
GO:0046463 acylglycerol biosynthetic process	1	0.128875253	0.909	0.034	Biological Process	GO:0046463	acylglycerol biosynthetic process	0.128875253	0.297239597	0	0	1	29
GO:0044427 chromosomal part	4	0.191632649	3.478	0.01	Cellular Component	GO:0044427	chromosomal part	0.191632649	0.297949393	0	0	4	412
GO:0009504 cell plate	1	0.193600179	0.87	0.026	Cellular Component	GO:0009504	cell plate	0.193600179	0.29896082	0	0	1	39
GO:0048878 chemical homeostasis	4	0.130116943	3.636	0.01	Biological Process	GO:0048878	chemical homeostasis	0.130116943	0.299392302	0	0	4	409
GO:0008374 O-acyltransferase activity	2	0.123586688	1.869	0.017	Molecular Function	GO:0008374	O-acyltransferase activity	0.123586688	0.300139099	0	0	2	121
GO:0000045 autophagosome assembly	1	0.13301254	0.909	0.033	Biological Process	GO:0000045	autophagosome assembly	0.13301254	0.30247114	0	0	1	30
GO:0006563 L-serine metabolic process	1	0.13301254	0.909	0.033	Biological Process	GO:0006563	L-serine metabolic process	0.13301254	0.30247114	0	0	1	30
GO:0019319 hexose biosynthetic process	1	0.13301254	0.909	0.033	Biological Process	GO:0019319	hexose biosynthetic process	0.13301254	0.30247114	0	0	1	30
GO:0030042 actin filament depolymerization	1	0.13301254	0.909	0.033	Biological Process	GO:0030042	actin filament depolymerization	0.13301254	0.30247114	0	0	1	30
GO:0046112 nucleobase biosynthetic process	1	0.13301254	0.909	0.033	Biological Process	GO:0046112	nucleobase biosynthetic process	0.13301254	0.30247114	0	0	1	30
GO:1990204 oxidoreductase complex	2	0.197654712	1.739	0.013	Cellular Component	GO:1990204	oxidoreductase complex	0.197654712	0.303159592	0	0	2	149
GO:0005384 manganese ion transmembrane transporter activity	1	0.127091433	0.935	0.037	Molecular Function	GO:0005384	manganese ion transmembrane transporter activity	0.127091433	0.306220302	0	0	1	27
GO:0005788 endoplasmic reticulum lumen	1	0.202458262	0.87	0.024	Cellular Component	GO:0005788	endoplasmic reticulum lumen	0.202458262	0.308443124	0	0	1	41
GO:0048509 regulation of meristem development	2	0.136318843	1.818	0.015	Biological Process	GO:0048509	regulation of meristem development	0.136318843	0.309265412	0	0	2	136
GO:1903008 organelle disassembly	1	0.137130357	0.909	0.032	Biological Process	GO:1903008	organelle disassembly	0.137130357	0.310381297	0	0	1	31
GO:0005543 phospholipid binding	2	0.130285634	1.869	0.016	Molecular Function	GO:0005543	phospholipid binding	0.130285634	0.311464093	0	0	2	125
GO:0015926 glucosidase activity	2	0.135364434	1.869	0.016	Molecular Function	GO:0015926	glucosidase activity	0.135364434	0.312539049	0	0	2	128
GO:0016407 acetyltransferase activity	2	0.135364434	1.869	0.016	Molecular Function	GO:0016407	acetyltransferase activity	0.135364434	0.312539049	0	0	2	128
GO:0008266 poly(U) RNA binding	1	0.135842136	0.935	0.034	Molecular Function	GO:0008266	poly(U) RNA binding	0.135842136	0.312539049	0	0	1	29
GO:0046933 proton-transporting ATP synthase activity, rotational mechanism	1	0.135842136	0.935	0.034	Molecular Function	GO:0046933	proton-transporting ATP synthase activity, rotational mechanism	0.135842136	0.312539049	0	0	1	29
GO:0097602 cullin family protein binding	1	0.135842136	0.935	0.034	Molecular Function	GO:0097602	cullin family protein binding	0.135842136	0.312539049	0	0	1	29
GO:0009250 glucan biosynthetic process	2	0.141166429	1.818	0.014	Biological Process	GO:0009250	glucan biosynthetic process	0.141166429	0.315975016	0	0	2	139
GO:0019318 hexose metabolic process	2	0.141166429	1.818	0.014	Biological Process	GO:0019318	hexose metabolic process	0.141166429	0.315975016	0	0	2	139
GO:0090333 regulation of stomatal closure	1	0.141228792	0.909	0.031	Biological Process	GO:0090333	regulation of stomatal closure	0.141228792	0.315975016	0	0	1	32
GO:1901071 glucosamine-containing compound metabolic process	1	0.141228792	0.909	0.031	Biological Process	GO:1901071	glucosamine-containing compound metabolic process	0.141228792	0.315975016	0	0	1	32
GO:1905037 autophagosome organization	1	0.141228792	0.909	0.031	Biological Process	GO:1905037	autophagosome organization	0.141228792	0.315975016	0	0	1	32
GO:0007623 circadian rhythm	2	0.144418749	1.818	0.014	Biological Process	GO:0007623	circadian rhythm	0.144418749	0.319217209	0	0	2	141
GO:0034404 nucleobase-containing small molecule biosynthetic process	2	0.144418749	1.818	0.014	Biological Process	GO:0034404	nucleobase-containing small molecule biosynthetic process	0.144418749	0.319217209	0	0	2	141
GO:0006641 triglyceride metabolic process	1	0.145307936	0.909	0.03	Biological Process	GO:0006641	triglyceride metabolic process	0.145307936	0.319217209	0	0	1	33
GO:0009625 response to insect	1	0.145307936	0.909	0.03	Biological Process	GO:0009625	response to insect	0.145307936	0.319217209	0	0	1	33
GO:0010193 response to ozone	1	0.145307936	0.909	0.03	Biological Process	GO:0010193	response to ozone	0.145307936	0.319217209	0	0	1	33
GO:0017000 antibiotic biosynthetic process	1	0.145307936	0.909	0.03	Biological Process	GO:0017000	antibiotic biosynthetic process	0.145307936	0.319217209	0	0	1	33
GO:0042026 protein refolding	1	0.145307936	0.909	0.03	Biological Process	GO:0042026	protein refolding	0.145307936	0.319217209	0	0	1	33
GO:0080022 primary root development	1	0.145307936	0.909	0.03	Biological Process	GO:0080022	primary root development	0.145307936	0.319217209	0	0	1	33
GO:0015301 anion:anion antiporter activity	1	0.140184841	0.935	0.033	Molecular Function	GO:0015301	anion:anion antiporter activity	0.140184841	0.320123593	0	0	1	30
GO:0006631 fatty acid metabolic process	3	0.146969056	2.727	0.011	Biological Process	GO:0006631	fatty acid metabolic process	0.146969056	0.321412058	0	0	3	279
GO:0050801 ion homeostasis	3	0.146969056	2.727	0.011	Biological Process	GO:0050801	ion homeostasis	0.146969056	0.321412058	0	0	3	279
GO:0072657 protein localization to membrane	2	0.147686855	1.818	0.014	Biological Process	GO:0072657	protein localization to membrane	0.147686855	0.322256037	0	0	2	143
GO:0004707 MAP kinase activity	1	0.144505926	0.935	0.032	Molecular Function	GO:0004707	MAP kinase activity	0.144505926	0.322765062	0	0	1	31
GO:0005200 structural constituent of cytoskeleton	1	0.144505926	0.935	0.032	Molecular Function	GO:0005200	structural constituent of cytoskeleton	0.144505926	0.322765062	0	0	1	31
GO:0016668 oxidoreductase activity, acting on a sulfur group of donors, NAD(P) as acceptor	1	0.144505926	0.935	0.032	Molecular Function	GO:0016668	oxidoreductase activity, acting on a sulfur group of donors, NAD(P) as acceptor	0.144505926	0.322765062	0	0	1	31
GO:0005778 peroxisomal membrane	1	0.215564838	0.87	0.023	Cellular Component	GO:0005778	peroxisomal membrane	0.215564838	0.324061048	0	0	1	44
GO:0031903 microbody membrane	1	0.215564838	0.87	0.023	Cellular Component	GO:0031903	microbody membrane	0.215564838	0.324061048	0	0	1	44
GO:0070566 adenylyltransferase activity	1	0.148805497	0.935	0.031	Molecular Function	GO:0070566	adenylyltransferase activity	0.148805497	0.329960016	0	0	1	32
GO:0000460 maturation of 5.8S rRNA	1	0.153408714	0.909	0.029	Biological Process	GO:0000460	maturation of 5.8S rRNA	0.153408714	0.331759156	0	0	1	35
GO:0030968 endoplasmic reticulum unfolded protein response	1	0.153408714	0.909	0.029	Biological Process	GO:0030968	endoplasmic reticulum unfolded protein response	0.153408714	0.331759156	0	0	1	35
GO:0043628 ncRNA 3'-end processing	1	0.153408714	0.909	0.029	Biological Process	GO:0043628	ncRNA 3'-end processing	0.153408714	0.331759156	0	0	1	35
GO:0046164 alcohol catabolic process	1	0.153408714	0.909	0.029	Biological Process	GO:0046164	alcohol catabolic process	0.153408714	0.331759156	0	0	1	35
GO:0008187 poly-pyrimidine tract binding	1	0.15308366	0.935	0.03	Molecular Function	GO:0008187	poly-pyrimidine tract binding	0.15308366	0.332224114	0	0	1	33
GO:0016762 xyloglucan:xyloglucosyl transferase activity	1	0.15308366	0.935	0.03	Molecular Function	GO:0016762	xyloglucan:xyloglucosyl transferase activity	0.15308366	0.332224114	0	0	1	33
GO:0016857 racemase and epimerase activity, acting on carbohydrates and derivatives	1	0.15308366	0.935	0.03	Molecular Function	GO:0016857	racemase and epimerase activity, acting on carbohydrates and derivatives	0.15308366	0.332224114	0	0	1	33
GO:0010383 cell wall polysaccharide metabolic process	2	0.155922384	1.818	0.014	Biological Process	GO:0010383	cell wall polysaccharide metabolic process	0.155922384	0.336445856	0	0	2	148
GO:0016043 cellular component organization	20	0.15643541	18.182	0.006	Biological Process	GO:0016043	cellular component organization	0.15643541	0.336804397	0	0	20	3331
GO:0072530 purine-containing compound transmembrane transport	1	0.157430525	0.909	0.028	Biological Process	GO:0072530	purine-containing compound transmembrane transport	0.157430525	0.338196991	0	0	1	36
GO:0048511 rhythmic process	2	0.159241217	1.818	0.013	Biological Process	GO:0048511	rhythmic process	0.159241217	0.340025672	0	0	2	150
GO:0009605 response to external stimulus	12	0.160927454	10.909	0.007	Biological Process	GO:0009605	response to external stimulus	0.160927454	0.340025672	0	0	12	1837
GO:0006515 protein quality control for misfolded or incompletely synthesized proteins	1	0.161433403	0.909	0.027	Biological Process	GO:0006515	protein quality control for misfolded or incompletely synthesized proteins	0.161433403	0.340025672	0	0	1	37
GO:0006638 neutral lipid metabolic process	1	0.161433403	0.909	0.027	Biological Process	GO:0006638	neutral lipid metabolic process	0.161433403	0.340025672	0	0	1	37
GO:0006639 acylglycerol metabolic process	1	0.161433403	0.909	0.027	Biological Process	GO:0006639	acylglycerol metabolic process	0.161433403	0.340025672	0	0	1	37
GO:0006995 cellular response to nitrogen starvation	1	0.161433403	0.909	0.027	Biological Process	GO:0006995	cellular response to nitrogen starvation	0.161433403	0.340025672	0	0	1	37
GO:0034293 sexual sporulation	1	0.161433403	0.909	0.027	Biological Process	GO:0034293	sexual sporulation	0.161433403	0.340025672	0	0	1	37
GO:0043934 sporulation	1	0.161433403	0.909	0.027	Biological Process	GO:0043934	sporulation	0.161433403	0.340025672	0	0	1	37
GO:0048236 plant-type sporogenesis	1	0.161433403	0.909	0.027	Biological Process	GO:0048236	plant-type sporogenesis	0.161433403	0.340025672	0	0	1	37
GO:0022838 substrate-specific channel activity	2	0.157850623	1.869	0.014	Molecular Function	GO:0022838	substrate-specific channel activity	0.157850623	0.340156976	0	0	2	141
GO:0009055 electron transfer activity	2	0.159609079	1.869	0.014	Molecular Function	GO:0009055	electron transfer activity	0.159609079	0.341541106	0	0	2	142
GO:0009991 response to extracellular stimulus	3	0.16274976	2.727	0.01	Biological Process	GO:0009991	response to extracellular stimulus	0.16274976	0.342056313	0	0	3	293
GO:0015605 organophosphate ester transmembrane transporter activity	1	0.161576184	0.935	0.029	Molecular Function	GO:0015605	organophosphate ester transmembrane transporter activity	0.161576184	0.343349392	0	0	1	35
GO:0071669 plant-type cell wall organization or biogenesis	3	0.165045217	2.727	0.01	Biological Process	GO:0071669	plant-type cell wall organization or biogenesis	0.165045217	0.345420067	0	0	3	295
GO:0006826 iron ion transport	1	0.165417437	0.909	0.026	Biological Process	GO:0006826	iron ion transport	0.165417437	0.345420067	0	0	1	38
GO:0034614 cellular response to reactive oxygen species	1	0.165417437	0.909	0.026	Biological Process	GO:0034614	cellular response to reactive oxygen species	0.165417437	0.345420067	0	0	1	38
GO:0031201 SNARE complex	1	0.232708686	0.87	0.021	Cellular Component	GO:0031201	SNARE complex	0.232708686	0.346997014	0	0	1	48
GO:0032040 small-subunit processome	1	0.236936287	0.87	0.02	Cellular Component	GO:0032040	small-subunit processome	0.236936287	0.346997014	0	0	1	49
GO:0044438 microbody part	1	0.236936287	0.87	0.02	Cellular Component	GO:0044438	microbody part	0.236936287	0.346997014	0	0	1	49
GO:0044439 peroxisomal part	1	0.236936287	0.87	0.02	Cellular Component	GO:0044439	peroxisomal part	0.236936287	0.346997014	0	0	1	49
GO:0004601 peroxidase activity	2	0.164906276	1.869	0.014	Molecular Function	GO:0004601	peroxidase activity	0.164906276	0.348009106	0	0	2	145
GO:0006066 alcohol metabolic process	2	0.167595039	1.818	0.013	Biological Process	GO:0006066	alcohol metabolic process	0.167595039	0.349216272	0	0	2	155
GO:0002757 immune response-activating signal transduction	1	0.169382713	0.909	0.026	Biological Process	GO:0002757	immune response-activating signal transduction	0.169382713	0.350683613	0	0	1	39
GO:0002758 innate immune response-activating signal transduction	1	0.169382713	0.909	0.026	Biological Process	GO:0002758	innate immune response-activating signal transduction	0.169382713	0.350683613	0	0	1	39
GO:0002764 immune response-regulating signaling pathway	1	0.169382713	0.909	0.026	Biological Process	GO:0002764	immune response-regulating signaling pathway	0.169382713	0.350683613	0	0	1	39
GO:0043167 ion binding	39	0.167344133	36.449	0.006	Molecular Function	GO:0043167	ion binding	0.167344133	0.350734965	0	0	39	6750
GO:0009226 nucleotide-sugar biosynthetic process	1	0.17332932	0.909	0.025	Biological Process	GO:0009226	nucleotide-sugar biosynthetic process	0.17332932	0.356573666	0	0	1	40
GO:0016236 macroautophagy	1	0.17332932	0.909	0.025	Biological Process	GO:0016236	macroautophagy	0.17332932	0.356573666	0	0	1	40
GO:0032543 mitochondrial translation	1	0.17332932	0.909	0.025	Biological Process	GO:0032543	mitochondrial translation	0.17332932	0.356573666	0	0	1	40
GO:0042742 defense response to bacterium	4	0.174177452	3.636	0.009	Biological Process	GO:0042742	defense response to bacterium	0.174177452	0.357104247	0	0	4	459
GO:0048507 meristem development	3	0.174322773	2.727	0.01	Biological Process	GO:0048507	meristem development	0.174322773	0.357104247	0	0	3	303
GO:0046658 anchored component of plasma membrane	2	0.246087433	1.739	0.012	Cellular Component	GO:0046658	anchored component of plasma membrane	0.246087433	0.358088765	0	0	2	173
GO:0016887 ATPase activity	6	0.172461502	5.607	0.008	Molecular Function	GO:0016887	ATPase activity	0.172461502	0.359001494	0	0	6	746
GO:0004176 ATP-dependent peptidase activity	1	0.174157033	0.935	0.026	Molecular Function	GO:0004176	ATP-dependent peptidase activity	0.174157033	0.360081434	0	0	1	38
GO:0016684 oxidoreductase activity, acting on peroxide as acceptor	2	0.175591818	1.869	0.013	Molecular Function	GO:0016684	oxidoreductase activity, acting on peroxide as acceptor	0.175591818	0.360611384	0	0	2	151
GO:0006534 cysteine metabolic process	1	0.177257345	0.909	0.024	Biological Process	GO:0006534	cysteine metabolic process	0.177257345	0.361590089	0	0	1	41
GO:0009690 cytokinin metabolic process	1	0.177257345	0.909	0.024	Biological Process	GO:0009690	cytokinin metabolic process	0.177257345	0.361590089	0	0	1	41
GO:0044264 cellular polysaccharide metabolic process	3	0.1778398	2.727	0.01	Biological Process	GO:0044264	cellular polysaccharide metabolic process	0.1778398	0.362017705	0	0	3	306
GO:0006635 fatty acid beta-oxidation	1	0.181166874	0.909	0.024	Biological Process	GO:0006635	fatty acid beta-oxidation	0.181166874	0.364209182	0	0	1	42
GO:0006879 cellular iron ion homeostasis	1	0.181166874	0.909	0.024	Biological Process	GO:0006879	cellular iron ion homeostasis	0.181166874	0.364209182	0	0	1	42
GO:0009112 nucleobase metabolic process	1	0.181166874	0.909	0.024	Biological Process	GO:0009112	nucleobase metabolic process	0.181166874	0.364209182	0	0	1	42
GO:0019252 starch biosynthetic process	1	0.181166874	0.909	0.024	Biological Process	GO:0019252	starch biosynthetic process	0.181166874	0.364209182	0	0	1	42
GO:0045047 protein targeting to ER	1	0.181166874	0.909	0.024	Biological Process	GO:0045047	protein targeting to ER	0.181166874	0.364209182	0	0	1	42
GO:0072599 establishment of protein localization to endoplasmic reticulum	1	0.181166874	0.909	0.024	Biological Process	GO:0072599	establishment of protein localization to endoplasmic reticulum	0.181166874	0.364209182	0	0	1	42
GO:0008610 lipid biosynthetic process	5	0.182411389	4.545	0.008	Biological Process	GO:0008610	lipid biosynthetic process	0.182411389	0.36549613	0	0	5	633
GO:0009657 plastid organization	3	0.182559859	2.727	0.01	Biological Process	GO:0009657	plastid organization	0.182559859	0.36549613	0	0	3	310
GO:0009651 response to salt stress	4	0.184501453	3.636	0.009	Biological Process	GO:0009651	response to salt stress	0.184501453	0.366716964	0	0	4	470
GO:0071103 DNA conformation change	2	0.184517949	1.818	0.012	Biological Process	GO:0071103	DNA conformation change	0.184517949	0.366716964	0	0	2	165
GO:0006952 defense response	11	0.184860186	10	0.006	Biological Process	GO:0006952	defense response	0.184860186	0.366716964	0	0	11	1705
GO:0010218 response to far red light	1	0.185057994	0.909	0.023	Biological Process	GO:0010218	response to far red light	0.185057994	0.366716964	0	0	1	43
GO:0030433 ubiquitin-dependent ERAD pathway	1	0.185057994	0.909	0.023	Biological Process	GO:0030433	ubiquitin-dependent ERAD pathway	0.185057994	0.366716964	0	0	1	43
GO:0005643 nuclear pore	1	0.257730411	0.87	0.019	Cellular Component	GO:0005643	nuclear pore	0.257730411	0.370283565	0	0	1	54
GO:0016592 mediator complex	1	0.257730411	0.87	0.019	Cellular Component	GO:0016592	mediator complex	0.257730411	0.370283565	0	0	1	54
GO:0017004 cytochrome complex assembly	1	0.188930791	0.909	0.023	Biological Process	GO:0017004	cytochrome complex assembly	0.188930791	0.372007601	0	0	1	44
GO:0046128 purine ribonucleoside metabolic process	1	0.188930791	0.909	0.023	Biological Process	GO:0046128	purine ribonucleoside metabolic process	0.188930791	0.372007601	0	0	1	44
GO:0007568 aging	2	0.189643422	1.818	0.012	Biological Process	GO:0007568	aging	0.189643422	0.372007601	0	0	2	168
GO:0016054 organic acid catabolic process	2	0.189643422	1.818	0.012	Biological Process	GO:0016054	organic acid catabolic process	0.189643422	0.372007601	0	0	2	168
GO:0046395 carboxylic acid catabolic process	2	0.189643422	1.818	0.012	Biological Process	GO:0046395	carboxylic acid catabolic process	0.189643422	0.372007601	0	0	2	168
GO:0005794 Golgi apparatus	9	0.262367262	7.826	0.007	Cellular Component	GO:0005794	Golgi apparatus	0.262367262	0.374574645	0	0	9	1268
GO:0044272 sulfur compound biosynthetic process	2	0.191356332	1.818	0.012	Biological Process	GO:0044272	sulfur compound biosynthetic process	0.191356332	0.374610884	0	0	2	169
GO:0015718 monocarboxylic acid transport	1	0.192785349	0.909	0.022	Biological Process	GO:0015718	monocarboxylic acid transport	0.192785349	0.375139428	0	0	1	45
GO:0051651 maintenance of location in cell	1	0.192785349	0.909	0.022	Biological Process	GO:0051651	maintenance of location in cell	0.192785349	0.375139428	0	0	1	45
GO:1901616 organic hydroxy compound catabolic process	1	0.192785349	0.909	0.022	Biological Process	GO:1901616	organic hydroxy compound catabolic process	0.192785349	0.375139428	0	0	1	45
GO:0044260 cellular macromolecule metabolic process	41	0.19373211	37.273	0.005	Biological Process	GO:0044260	cellular macromolecule metabolic process	0.19373211	0.375826229	0	0	41	7645
GO:0009062 fatty acid catabolic process	1	0.196621755	0.909	0.022	Biological Process	GO:0009062	fatty acid catabolic process	0.196621755	0.375826229	0	0	1	46
GO:0010449 root meristem growth	1	0.196621755	0.909	0.022	Biological Process	GO:0010449	root meristem growth	0.196621755	0.375826229	0	0	1	46
GO:0016144 S-glycoside biosynthetic process	1	0.196621755	0.909	0.022	Biological Process	GO:0016144	S-glycoside biosynthetic process	0.196621755	0.375826229	0	0	1	46
GO:0019758 glycosinolate biosynthetic process	1	0.196621755	0.909	0.022	Biological Process	GO:0019758	glycosinolate biosynthetic process	0.196621755	0.375826229	0	0	1	46
GO:0019761 glucosinolate biosynthetic process	1	0.196621755	0.909	0.022	Biological Process	GO:0019761	glucosinolate biosynthetic process	0.196621755	0.375826229	0	0	1	46
GO:0043562 cellular response to nitrogen levels	1	0.196621755	0.909	0.022	Biological Process	GO:0043562	cellular response to nitrogen levels	0.196621755	0.375826229	0	0	1	46
GO:0047484 regulation of response to osmotic stress	1	0.196621755	0.909	0.022	Biological Process	GO:0047484	regulation of response to osmotic stress	0.196621755	0.375826229	0	0	1	46
GO:0051261 protein depolymerization	1	0.196621755	0.909	0.022	Biological Process	GO:0051261	protein depolymerization	0.196621755	0.375826229	0	0	1	46
GO:0005768 endosome	4	0.267609638	3.478	0.008	Cellular Component	GO:0005768	endosome	0.267609638	0.379671173	0	0	4	477
GO:0043207 response to external biotic stimulus	9	0.199419008	8.182	0.007	Biological Process	GO:0043207	response to external biotic stimulus	0.199419008	0.379678151	0	0	9	1365
GO:0051707 response to other organism	9	0.199419008	8.182	0.007	Biological Process	GO:0051707	response to other organism	0.199419008	0.379678151	0	0	9	1365
GO:0042278 purine nucleoside metabolic process	1	0.200440093	0.909	0.021	Biological Process	GO:0042278	purine nucleoside metabolic process	0.200440093	0.380131504	0	0	1	47
GO:0045454 cell redox homeostasis	1	0.200440093	0.909	0.021	Biological Process	GO:0045454	cell redox homeostasis	0.200440093	0.380131504	0	0	1	47
GO:0016854 racemase and epimerase activity	1	0.18655084	0.935	0.024	Molecular Function	GO:0016854	racemase and epimerase activity	0.18655084	0.380563714	0	0	1	41
GO:0005694 chromosome	4	0.270040034	3.478	0.008	Cellular Component	GO:0005694	chromosome	0.270040034	0.380739675	0	0	4	479
GO:0007062 sister chromatid cohesion	1	0.204240447	0.909	0.021	Biological Process	GO:0007062	sister chromatid cohesion	0.204240447	0.381379757	0	0	1	48
GO:0009163 nucleoside biosynthetic process	1	0.204240447	0.909	0.021	Biological Process	GO:0009163	nucleoside biosynthetic process	0.204240447	0.381379757	0	0	1	48
GO:0009789 positive regulation of abscisic acid-activated signaling pathway	1	0.204240447	0.909	0.021	Biological Process	GO:0009789	positive regulation of abscisic acid-activated signaling pathway	0.204240447	0.381379757	0	0	1	48
GO:0019395 fatty acid oxidation	1	0.204240447	0.909	0.021	Biological Process	GO:0019395	fatty acid oxidation	0.204240447	0.381379757	0	0	1	48
GO:0033108 mitochondrial respiratory chain complex assembly	1	0.204240447	0.909	0.021	Biological Process	GO:0033108	mitochondrial respiratory chain complex assembly	0.204240447	0.381379757	0	0	1	48
GO:0042455 ribonucleoside biosynthetic process	1	0.204240447	0.909	0.021	Biological Process	GO:0042455	ribonucleoside biosynthetic process	0.204240447	0.381379757	0	0	1	48
GO:1901421 positive regulation of response to alcohol	1	0.204240447	0.909	0.021	Biological Process	GO:1901421	positive regulation of response to alcohol	0.204240447	0.381379757	0	0	1	48
GO:1905959 positive regulation of cellular response to alcohol	1	0.204240447	0.909	0.021	Biological Process	GO:1905959	positive regulation of cellular response to alcohol	0.204240447	0.381379757	0	0	1	48
GO:0005615 extracellular space	2	0.272552941	1.739	0.011	Cellular Component	GO:0005615	extracellular space	0.272552941	0.381910602	0	0	2	186
GO:0005976 polysaccharide metabolic process	4	0.207695115	3.636	0.008	Biological Process	GO:0005976	polysaccharide metabolic process	0.207695115	0.384011857	0	0	4	494
GO:0000380 alternative mRNA splicing, via spliceosome	1	0.208022901	0.909	0.02	Biological Process	GO:0000380	alternative mRNA splicing, via spliceosome	0.208022901	0.384011857	0	0	1	49
GO:0006040 amino sugar metabolic process	1	0.208022901	0.909	0.02	Biological Process	GO:0006040	amino sugar metabolic process	0.208022901	0.384011857	0	0	1	49
GO:0006855 drug transmembrane transport	1	0.208022901	0.909	0.02	Biological Process	GO:0006855	drug transmembrane transport	0.208022901	0.384011857	0	0	1	49
GO:0034620 cellular response to unfolded protein	1	0.208022901	0.909	0.02	Biological Process	GO:0034620	cellular response to unfolded protein	0.208022901	0.384011857	0	0	1	49
GO:0090332 stomatal closure	1	0.208022901	0.909	0.02	Biological Process	GO:0090332	stomatal closure	0.208022901	0.384011857	0	0	1	49
GO:0009070 serine family amino acid biosynthetic process	1	0.211787538	0.909	0.02	Biological Process	GO:0009070	serine family amino acid biosynthetic process	0.211787538	0.390219544	0	0	1	50
GO:0044036 cell wall macromolecule metabolic process	2	0.213795798	1.818	0.011	Biological Process	GO:0044036	cell wall macromolecule metabolic process	0.213795798	0.392482009	0	0	2	182
GO:0009607 response to biotic stimulus	9	0.213823875	8.182	0.006	Biological Process	GO:0009607	response to biotic stimulus	0.213823875	0.392482009	0	0	9	1390
GO:0005764 lysosome	1	0.281943031	0.87	0.017	Cellular Component	GO:0005764	lysosome	0.281943031	0.392644589	0	0	1	60
GO:0009225 nucleotide-sugar metabolic process	1	0.215534443	0.909	0.02	Biological Process	GO:0009225	nucleotide-sugar metabolic process	0.215534443	0.394131722	0	0	1	51
GO:0009817 defense response to fungus, incompatible interaction	1	0.215534443	0.909	0.02	Biological Process	GO:0009817	defense response to fungus, incompatible interaction	0.215534443	0.394131722	0	0	1	51
GO:0044432 endoplasmic reticulum part	5	0.285811734	4.348	0.008	Cellular Component	GO:0044432	endoplasmic reticulum part	0.285811734	0.395605266	0	0	5	649
GO:0009832 plant-type cell wall biogenesis	2	0.219011955	1.818	0.011	Biological Process	GO:0009832	plant-type cell wall biogenesis	0.219011955	0.396471229	0	0	2	185
GO:0015931 nucleobase-containing compound transport	2	0.219011955	1.818	0.011	Biological Process	GO:0015931	nucleobase-containing compound transport	0.219011955	0.396471229	0	0	2	185
GO:0000165 MAPK cascade	1	0.219263697	0.909	0.019	Biological Process	GO:0000165	MAPK cascade	0.219263697	0.396471229	0	0	1	52
GO:0009696 salicylic acid metabolic process	1	0.219263697	0.909	0.019	Biological Process	GO:0009696	salicylic acid metabolic process	0.219263697	0.396471229	0	0	1	52
GO:0009851 auxin biosynthetic process	1	0.219263697	0.909	0.019	Biological Process	GO:0009851	auxin biosynthetic process	0.219263697	0.396471229	0	0	1	52
GO:0023014 signal transduction by protein phosphorylation	1	0.219263697	0.909	0.019	Biological Process	GO:0023014	signal transduction by protein phosphorylation	0.219263697	0.396471229	0	0	1	52
GO:0006457 protein folding	2	0.220753229	1.818	0.011	Biological Process	GO:0006457	protein folding	0.220753229	0.398422649	0	0	2	186
GO:0006732 coenzyme metabolic process	3	0.22266719	2.727	0.009	Biological Process	GO:0006732	coenzyme metabolic process	0.22266719	0.400201658	0	0	3	343
GO:0002218 activation of innate immune response	1	0.222975383	0.909	0.019	Biological Process	GO:0002218	activation of innate immune response	0.222975383	0.400201658	0	0	1	53
GO:0002253 activation of immune response	1	0.222975383	0.909	0.019	Biological Process	GO:0002253	activation of immune response	0.222975383	0.400201658	0	0	1	53
GO:0000272 polysaccharide catabolic process	2	0.224239306	1.818	0.011	Biological Process	GO:0000272	polysaccharide catabolic process	0.224239306	0.401727614	0	0	2	188
GO:0050662 coenzyme binding	4	0.198406833	3.738	0.009	Molecular Function	GO:0050662	coenzyme binding	0.198406833	0.402069477	0	0	4	458
GO:0000097 sulfur amino acid biosynthetic process	1	0.226669583	0.909	0.019	Biological Process	GO:0000097	sulfur amino acid biosynthetic process	0.226669583	0.40310653	0	0	1	54
GO:0006986 response to unfolded protein	1	0.226669583	0.909	0.019	Biological Process	GO:0006986	response to unfolded protein	0.226669583	0.40310653	0	0	1	54
GO:0009631 cold acclimation	1	0.226669583	0.909	0.019	Biological Process	GO:0009631	cold acclimation	0.226669583	0.40310653	0	0	1	54
GO:0009767 photosynthetic electron transport chain	1	0.226669583	0.909	0.019	Biological Process	GO:0009767	photosynthetic electron transport chain	0.226669583	0.40310653	0	0	1	54
GO:0000775 chromosome, centromeric region	1	0.293754066	0.87	0.016	Cellular Component	GO:0000775	chromosome, centromeric region	0.293754066	0.404134382	0	0	1	63
GO:0015629 actin cytoskeleton	1	0.29764812	0.87	0.016	Cellular Component	GO:0015629	actin cytoskeleton	0.29764812	0.407024839	0	0	1	64
GO:0042435 indole-containing compound biosynthetic process	1	0.230346379	0.909	0.018	Biological Process	GO:0042435	indole-containing compound biosynthetic process	0.230346379	0.408150245	0	0	1	55
GO:0046885 regulation of hormone biosynthetic process	1	0.230346379	0.909	0.018	Biological Process	GO:0046885	regulation of hormone biosynthetic process	0.230346379	0.408150245	0	0	1	55
GO:0005741 mitochondrial outer membrane	1	0.301520889	0.87	0.015	Cellular Component	GO:0005741	mitochondrial outer membrane	0.301520889	0.409851747	0	0	1	65
GO:0000323 lytic vacuole	1	0.305372488	0.87	0.015	Cellular Component	GO:0000323	lytic vacuole	0.305372488	0.412616397	0	0	1	66
GO:0009251 glucan catabolic process	1	0.234005852	0.909	0.018	Biological Process	GO:0009251	glucan catabolic process	0.234005852	0.413879202	0	0	1	56
GO:0000793 condensed chromosome	1	0.309203032	0.87	0.015	Cellular Component	GO:0000793	condensed chromosome	0.309203032	0.415320049	0	0	1	67
GO:2000377 regulation of reactive oxygen species metabolic process	1	0.237648082	0.909	0.018	Biological Process	GO:2000377	regulation of reactive oxygen species metabolic process	0.237648082	0.419556887	0	0	1	57
GO:0000932 P-body	1	0.31680141	0.87	0.014	Cellular Component	GO:0000932	P-body	0.31680141	0.421106447	0	0	1	69
GO:0044421 extracellular region part	2	0.317221156	1.739	0.01	Cellular Component	GO:0044421	extracellular region part	0.317221156	0.421106447	0	0	2	208
GO:0005048 signal sequence binding	1	0.210788307	0.935	0.021	Molecular Function	GO:0005048	signal sequence binding	0.210788307	0.421695161	0	0	1	47
GO:0016829 lyase activity	4	0.21084758	3.738	0.009	Molecular Function	GO:0016829	lyase activity	0.21084758	0.421695161	0	0	4	470
GO:0015267 channel activity	2	0.213739799	1.869	0.012	Molecular Function	GO:0015267	channel activity	0.213739799	0.421963733	0	0	2	172
GO:0022803 passive transmembrane transporter activity	2	0.213739799	1.869	0.012	Molecular Function	GO:0022803	passive transmembrane transporter activity	0.213739799	0.421963733	0	0	2	172
GO:0034440 lipid oxidation	1	0.241273151	0.909	0.017	Biological Process	GO:0034440	lipid oxidation	0.241273151	0.424413459	0	0	1	58
GO:0036503 ERAD pathway	1	0.241273151	0.909	0.017	Biological Process	GO:0036503	ERAD pathway	0.241273151	0.424413459	0	0	1	58
GO:0033692 cellular polysaccharide biosynthetic process	2	0.241727606	1.818	0.01	Biological Process	GO:0033692	cellular polysaccharide biosynthetic process	0.241727606	0.424443952	0	0	2	198
GO:0008154 actin polymerization or depolymerization	1	0.244881137	0.909	0.017	Biological Process	GO:0008154	actin polymerization or depolymerization	0.244881137	0.429205026	0	0	1	59
GO:0051321 meiotic cell cycle	2	0.246988331	1.818	0.01	Biological Process	GO:0051321	meiotic cell cycle	0.246988331	0.432118322	0	0	2	201
GO:0007005 mitochondrion organization	2	0.250497998	1.818	0.01	Biological Process	GO:0007005	mitochondrion organization	0.250497998	0.437470424	0	0	2	203
GO:0006417 regulation of translation	2	0.252253456	1.818	0.01	Biological Process	GO:0006417	regulation of translation	0.252253456	0.439745252	0	0	2	204
GO:1901615 organic hydroxy compound metabolic process	3	0.252859983	2.727	0.008	Biological Process	GO:1901615	organic hydroxy compound metabolic process	0.252859983	0.440012623	0	0	3	367
GO:0016413 O-acetyltransferase activity	1	0.226547743	0.935	0.02	Molecular Function	GO:0016413	O-acetyltransferase activity	0.226547743	0.441551651	0	0	1	51
GO:0016877 ligase activity, forming carbon-sulfur bonds	1	0.226547743	0.935	0.02	Molecular Function	GO:0016877	ligase activity, forming carbon-sulfur bonds	0.226547743	0.441551651	0	0	1	51
GO:0033554 cellular response to stress	8	0.254447488	7.273	0.006	Biological Process	GO:0033554	cellular response to stress	0.254447488	0.441620828	0	0	8	1269
GO:0000911 cytokinesis by cell plate formation	1	0.255603404	0.909	0.016	Biological Process	GO:0000911	cytokinesis by cell plate formation	0.255603404	0.441620828	0	0	1	62
GO:0009247 glycolipid biosynthetic process	1	0.255603404	0.909	0.016	Biological Process	GO:0009247	glycolipid biosynthetic process	0.255603404	0.441620828	0	0	1	62
GO:0015748 organophosphate ester transport	1	0.255603404	0.909	0.016	Biological Process	GO:0015748	organophosphate ester transport	0.255603404	0.441620828	0	0	1	62
GO:0016616 oxidoreductase activity, acting on the CH-OH group of donors, NAD or NADP as acceptor	2	0.228487229	1.869	0.011	Molecular Function	GO:0016616	oxidoreductase activity, acting on the CH-OH group of donors, NAD or NADP as acceptor	0.228487229	0.44251324	0	0	2	180
GO:0034248 regulation of cellular amide metabolic process	2	0.257521813	1.818	0.01	Biological Process	GO:0034248	regulation of cellular amide metabolic process	0.257521813	0.44378957	0	0	2	207
GO:0006418 tRNA aminoacylation for protein translation	1	0.259143858	0.909	0.016	Biological Process	GO:0006418	tRNA aminoacylation for protein translation	0.259143858	0.44378957	0	0	1	63
GO:0010114 response to red light	1	0.259143858	0.909	0.016	Biological Process	GO:0010114	response to red light	0.259143858	0.44378957	0	0	1	63
GO:0071804 cellular potassium ion transport	1	0.259143858	0.909	0.016	Biological Process	GO:0071804	cellular potassium ion transport	0.259143858	0.44378957	0	0	1	63
GO:0071805 potassium ion transmembrane transport	1	0.259143858	0.909	0.016	Biological Process	GO:0071805	potassium ion transmembrane transport	0.259143858	0.44378957	0	0	1	63
GO:0071702 organic substance transport	9	0.262542985	8.182	0.006	Biological Process	GO:0071702	organic substance transport	0.262542985	0.445892071	0	0	9	1470
GO:0032506 cytokinetic process	1	0.262667626	0.909	0.016	Biological Process	GO:0032506	cytokinetic process	0.262667626	0.445892071	0	0	1	64
GO:0046364 monosaccharide biosynthetic process	1	0.262667626	0.909	0.016	Biological Process	GO:0046364	monosaccharide biosynthetic process	0.262667626	0.445892071	0	0	1	64
GO:0046890 regulation of lipid biosynthetic process	1	0.262667626	0.909	0.016	Biological Process	GO:0046890	regulation of lipid biosynthetic process	0.262667626	0.445892071	0	0	1	64
GO:1902410 mitotic cytokinetic process	1	0.262667626	0.909	0.016	Biological Process	GO:1902410	mitotic cytokinetic process	0.262667626	0.445892071	0	0	1	64
GO:0006970 response to osmotic stress	4	0.263628858	3.636	0.007	Biological Process	GO:0006970	response to osmotic stress	0.263628858	0.446742795	0	0	4	549
GO:0070972 protein localization to endoplasmic reticulum	1	0.266174785	0.909	0.015	Biological Process	GO:0070972	protein localization to endoplasmic reticulum	0.266174785	0.450271283	0	0	1	65
GO:0016051 carbohydrate biosynthetic process	3	0.266901487	2.727	0.008	Biological Process	GO:0016051	carbohydrate biosynthetic process	0.266901487	0.450715381	0	0	3	378
GO:0099516 ion antiporter activity	1	0.234310146	0.935	0.019	Molecular Function	GO:0099516	ion antiporter activity	0.234310146	0.450936508	0	0	1	53
GO:0009749 response to glucose	1	0.269665413	0.909	0.015	Biological Process	GO:0009749	response to glucose	0.269665413	0.454066006	0	0	1	66
GO:0098656 anion transmembrane transport	2	0.269820891	1.818	0.009	Biological Process	GO:0098656	anion transmembrane transport	0.269820891	0.454066006	0	0	2	214
GO:1901701 cellular response to oxygen-containing compound	5	0.272879327	4.545	0.007	Biological Process	GO:1901701	cellular response to oxygen-containing compound	0.272879327	0.457273344	0	0	5	738
GO:0055072 iron ion homeostasis	1	0.273139587	0.909	0.015	Biological Process	GO:0055072	iron ion homeostasis	0.273139587	0.457273344	0	0	1	67
GO:0070588 calcium ion transmembrane transport	1	0.273139587	0.909	0.015	Biological Process	GO:0070588	calcium ion transmembrane transport	0.273139587	0.457273344	0	0	1	67
GO:0006664 glycolipid metabolic process	1	0.276597385	0.909	0.015	Biological Process	GO:0006664	glycolipid metabolic process	0.276597385	0.459890515	0	0	1	68
GO:0043038 amino acid activation	1	0.276597385	0.909	0.015	Biological Process	GO:0043038	amino acid activation	0.276597385	0.459890515	0	0	1	68
GO:0043039 tRNA aminoacylation	1	0.276597385	0.909	0.015	Biological Process	GO:0043039	tRNA aminoacylation	0.276597385	0.459890515	0	0	1	68
GO:1903509 liposaccharide metabolic process	1	0.276597385	0.909	0.015	Biological Process	GO:1903509	liposaccharide metabolic process	0.276597385	0.459890515	0	0	1	68
GO:0070887 cellular response to chemical stimulus	10	0.278492884	9.091	0.006	Biological Process	GO:0070887	cellular response to chemical stimulus	0.278492884	0.461660023	0	0	10	1687
GO:0016032 viral process	1	0.280038881	0.909	0.014	Biological Process	GO:0016032	viral process	0.280038881	0.461660023	0	0	1	69
GO:0018958 phenol-containing compound metabolic process	1	0.280038881	0.909	0.014	Biological Process	GO:0018958	phenol-containing compound metabolic process	0.280038881	0.461660023	0	0	1	69
GO:0043624 cellular protein complex disassembly	1	0.280038881	0.909	0.014	Biological Process	GO:0043624	cellular protein complex disassembly	0.280038881	0.461660023	0	0	1	69
GO:0140053 mitochondrial gene expression	1	0.280038881	0.909	0.014	Biological Process	GO:0140053	mitochondrial gene expression	0.280038881	0.461660023	0	0	1	69
GO:1901657 glycosyl compound metabolic process	2	0.282117648	1.818	0.009	Biological Process	GO:1901657	glycosyl compound metabolic process	0.282117648	0.464154626	0	0	2	221
GO:0006497 protein lipidation	1	0.283464154	0.909	0.014	Biological Process	GO:0006497	protein lipidation	0.283464154	0.464154626	0	0	1	70
GO:0006816 calcium ion transport	1	0.283464154	0.909	0.014	Biological Process	GO:0006816	calcium ion transport	0.283464154	0.464154626	0	0	1	70
GO:0042158 lipoprotein biosynthetic process	1	0.283464154	0.909	0.014	Biological Process	GO:0042158	lipoprotein biosynthetic process	0.283464154	0.464154626	0	0	1	70
GO:0071229 cellular response to acid chemical	4	0.286793732	3.636	0.007	Biological Process	GO:0071229	cellular response to acid chemical	0.286793732	0.464256588	0	0	4	571
GO:0002684 positive regulation of immune system process	1	0.286873278	0.909	0.014	Biological Process	GO:0002684	positive regulation of immune system process	0.286873278	0.464256588	0	0	1	71
GO:0007033 vacuole organization	1	0.286873278	0.909	0.014	Biological Process	GO:0007033	vacuole organization	0.286873278	0.464256588	0	0	1	71
GO:0032350 regulation of hormone metabolic process	1	0.286873278	0.909	0.014	Biological Process	GO:0032350	regulation of hormone metabolic process	0.286873278	0.464256588	0	0	1	71
GO:0045089 positive regulation of innate immune response	1	0.286873278	0.909	0.014	Biological Process	GO:0045089	positive regulation of innate immune response	0.286873278	0.464256588	0	0	1	71
GO:0050778 positive regulation of immune response	1	0.286873278	0.909	0.014	Biological Process	GO:0050778	positive regulation of immune response	0.286873278	0.464256588	0	0	1	71
GO:2000028 regulation of photoperiodism, flowering	1	0.286873278	0.909	0.014	Biological Process	GO:2000028	regulation of photoperiodism, flowering	0.286873278	0.464256588	0	0	1	71
GO:0006096 glycolytic process	1	0.290266328	0.909	0.014	Biological Process	GO:0006096	glycolytic process	0.290266328	0.466636763	0	0	1	72
GO:0006757 ATP generation from ADP	1	0.290266328	0.909	0.014	Biological Process	GO:0006757	ATP generation from ADP	0.290266328	0.466636763	0	0	1	72
GO:0015893 drug transport	1	0.290266328	0.909	0.014	Biological Process	GO:0015893	drug transport	0.290266328	0.466636763	0	0	1	72
GO:0046031 ADP metabolic process	1	0.290266328	0.909	0.014	Biological Process	GO:0046031	ADP metabolic process	0.290266328	0.466636763	0	0	1	72
GO:0009069 serine family amino acid metabolic process	1	0.293643381	0.909	0.014	Biological Process	GO:0009069	serine family amino acid metabolic process	0.293643381	0.467094099	0	0	1	73
GO:0009746 response to hexose	1	0.293643381	0.909	0.014	Biological Process	GO:0009746	response to hexose	0.293643381	0.467094099	0	0	1	73
GO:0035967 cellular response to topologically incorrect protein	1	0.293643381	0.909	0.014	Biological Process	GO:0035967	cellular response to topologically incorrect protein	0.293643381	0.467094099	0	0	1	73
GO:0042157 lipoprotein metabolic process	1	0.293643381	0.909	0.014	Biological Process	GO:0042157	lipoprotein metabolic process	0.293643381	0.467094099	0	0	1	73
GO:0042866 pyruvate biosynthetic process	1	0.293643381	0.909	0.014	Biological Process	GO:0042866	pyruvate biosynthetic process	0.293643381	0.467094099	0	0	1	73
GO:0051028 mRNA transport	1	0.293643381	0.909	0.014	Biological Process	GO:0051028	mRNA transport	0.293643381	0.467094099	0	0	1	73
GO:0071214 cellular response to abiotic stimulus	2	0.294399164	1.818	0.009	Biological Process	GO:0071214	cellular response to abiotic stimulus	0.294399164	0.467094099	0	0	2	228
GO:0104004 cellular response to environmental stimulus	2	0.294399164	1.818	0.009	Biological Process	GO:0104004	cellular response to environmental stimulus	0.294399164	0.467094099	0	0	2	228
GO:0046983 protein dimerization activity	5	0.245693405	4.673	0.007	Molecular Function	GO:0046983	protein dimerization activity	0.245693405	0.467190293	0	0	5	669
GO:0005085 guanyl-nucleotide exchange factor activity	1	0.245809272	0.935	0.018	Molecular Function	GO:0005085	guanyl-nucleotide exchange factor activity	0.245809272	0.467190293	0	0	1	56
GO:0051603 proteolysis involved in cellular protein catabolic process	4	0.295295396	3.636	0.007	Biological Process	GO:0051603	proteolysis involved in cellular protein catabolic process	0.295295396	0.467751761	0	0	4	579
GO:0017111 nucleoside-triphosphatase activity	7	0.247933565	6.542	0.007	Molecular Function	GO:0017111	nucleoside-triphosphatase activity	0.247933565	0.468318956	0	0	7	1015
GO:0004185 serine-type carboxypeptidase activity	1	0.249604165	0.935	0.018	Molecular Function	GO:0004185	serine-type carboxypeptidase activity	0.249604165	0.468582053	0	0	1	57
GO:0015711 organic anion transport	2	0.299654982	1.818	0.009	Biological Process	GO:0015711	organic anion transport	0.299654982	0.472673658	0	0	2	231
GO:0009135 purine nucleoside diphosphate metabolic process	1	0.300349791	0.909	0.013	Biological Process	GO:0009135	purine nucleoside diphosphate metabolic process	0.300349791	0.472673658	0	0	1	75
GO:0009179 purine ribonucleoside diphosphate metabolic process	1	0.300349791	0.909	0.013	Biological Process	GO:0009179	purine ribonucleoside diphosphate metabolic process	0.300349791	0.472673658	0	0	1	75
GO:0009744 response to sucrose	1	0.300349791	0.909	0.013	Biological Process	GO:0009744	response to sucrose	0.300349791	0.472673658	0	0	1	75
GO:0070008 serine-type exopeptidase activity	1	0.253380141	0.935	0.017	Molecular Function	GO:0070008	serine-type exopeptidase activity	0.253380141	0.472770264	0	0	1	58
GO:0045087 innate immune response	3	0.30171636	2.727	0.007	Biological Process	GO:0045087	innate immune response	0.30171636	0.474055964	0	0	3	405
GO:0005982 starch metabolic process	1	0.303679297	0.909	0.013	Biological Process	GO:0005982	starch metabolic process	0.303679297	0.4748351	0	0	1	76
GO:0009119 ribonucleoside metabolic process	1	0.303679297	0.909	0.013	Biological Process	GO:0009119	ribonucleoside metabolic process	0.303679297	0.4748351	0	0	1	76
GO:0051235 maintenance of location	1	0.303679297	0.909	0.013	Biological Process	GO:0051235	maintenance of location	0.303679297	0.4748351	0	0	1	76
GO:0044257 cellular protein catabolic process	4	0.304899925	3.636	0.007	Biological Process	GO:0044257	cellular protein catabolic process	0.304899925	0.475977214	0	0	4	588
GO:0009057 macromolecule catabolic process	6	0.306061687	5.455	0.006	Biological Process	GO:0009057	macromolecule catabolic process	0.306061687	0.47618259	0	0	6	962
GO:0006612 protein targeting to membrane	1	0.306993101	0.909	0.013	Biological Process	GO:0006612	protein targeting to membrane	0.306993101	0.47618259	0	0	1	77
GO:0034284 response to monosaccharide	1	0.306993101	0.909	0.013	Biological Process	GO:0034284	response to monosaccharide	0.306993101	0.47618259	0	0	1	77
GO:0034285 response to disaccharide	1	0.306993101	0.909	0.013	Biological Process	GO:0034285	response to disaccharide	0.306993101	0.47618259	0	0	1	77
GO:0022900 electron transport chain	2	0.310147934	1.818	0.008	Biological Process	GO:0022900	electron transport chain	0.310147934	0.479765654	0	0	2	237
GO:0035266 meristem growth	1	0.310291278	0.909	0.013	Biological Process	GO:0035266	meristem growth	0.310291278	0.479765654	0	0	1	78
GO:0042430 indole-containing compound metabolic process	1	0.3135739	0.909	0.013	Biological Process	GO:0042430	indole-containing compound metabolic process	0.3135739	0.482636402	0	0	1	79
GO:0000271 polysaccharide biosynthetic process	2	0.313639104	1.818	0.008	Biological Process	GO:0000271	polysaccharide biosynthetic process	0.313639104	0.482636402	0	0	2	239
GO:0009658 chloroplast organization	2	0.313639104	1.818	0.008	Biological Process	GO:0009658	chloroplast organization	0.313639104	0.482636402	0	0	2	239
GO:0009733 response to auxin	3	0.31468651	2.727	0.007	Biological Process	GO:0009733	response to auxin	0.31468651	0.483481964	0	0	3	415
GO:0034637 cellular carbohydrate biosynthetic process	2	0.315383333	1.818	0.008	Biological Process	GO:0034637	cellular carbohydrate biosynthetic process	0.315383333	0.483730581	0	0	2	240
GO:0000096 sulfur amino acid metabolic process	1	0.31684104	0.909	0.013	Biological Process	GO:0000096	sulfur amino acid metabolic process	0.31684104	0.483730581	0	0	1	80
GO:0009185 ribonucleoside diphosphate metabolic process	1	0.31684104	0.909	0.013	Biological Process	GO:0009185	ribonucleoside diphosphate metabolic process	0.31684104	0.483730581	0	0	1	80
GO:0031123 RNA 3'-end processing	1	0.31684104	0.909	0.013	Biological Process	GO:0031123	RNA 3'-end processing	0.31684104	0.483730581	0	0	1	80
GO:0016763 transferase activity, transferring pentosyl groups	1	0.260875714	0.935	0.017	Molecular Function	GO:0016763	transferase activity, transferring pentosyl groups	0.260875714	0.48380587	0	0	1	60
GO:0016860 intramolecular oxidoreductase activity	1	0.264595497	0.935	0.016	Molecular Function	GO:0016860	intramolecular oxidoreductase activity	0.264595497	0.484777932	0	0	1	61
GO:0042626 ATPase activity, coupled to transmembrane movement of substances	2	0.267461476	1.869	0.01	Molecular Function	GO:0042626	ATPase activity, coupled to transmembrane movement of substances	0.267461476	0.484777932	0	0	2	201
GO:0004712 protein serine/threonine/tyrosine kinase activity	1	0.268296733	0.935	0.016	Molecular Function	GO:0004712	protein serine/threonine/tyrosine kinase activity	0.268296733	0.484777932	0	0	1	62
GO:0008080 N-acetyltransferase activity	1	0.268296733	0.935	0.016	Molecular Function	GO:0008080	N-acetyltransferase activity	0.268296733	0.484777932	0	0	1	62
GO:0043492 ATPase activity, coupled to movement of substances	2	0.269321073	1.869	0.01	Molecular Function	GO:0043492	ATPase activity, coupled to movement of substances	0.269321073	0.484777932	0	0	2	202
GO:0006955 immune response	3	0.319879868	2.727	0.007	Biological Process	GO:0006955	immune response	0.319879868	0.486400751	0	0	3	419
GO:0006165 nucleoside diphosphate phosphorylation	1	0.32009277	0.909	0.012	Biological Process	GO:0006165	nucleoside diphosphate phosphorylation	0.32009277	0.486400751	0	0	1	81
GO:0035966 response to topologically incorrect protein	1	0.32009277	0.909	0.012	Biological Process	GO:0035966	response to topologically incorrect protein	0.32009277	0.486400751	0	0	1	81
GO:0009408 response to heat	2	0.320610234	1.818	0.008	Biological Process	GO:0009408	response to heat	0.320610234	0.486425839	0	0	2	243
GO:0019216 regulation of lipid metabolic process	1	0.326550289	0.909	0.012	Biological Process	GO:0019216	regulation of lipid metabolic process	0.326550289	0.490836425	0	0	1	83
GO:0032535 regulation of cellular component size	1	0.326550289	0.909	0.012	Biological Process	GO:0032535	regulation of cellular component size	0.326550289	0.490836425	0	0	1	83
GO:0034599 cellular response to oxidative stress	1	0.326550289	0.909	0.012	Biological Process	GO:0034599	cellular response to oxidative stress	0.326550289	0.490836425	0	0	1	83
GO:0046939 nucleotide phosphorylation	1	0.326550289	0.909	0.012	Biological Process	GO:0046939	nucleotide phosphorylation	0.326550289	0.490836425	0	0	1	83
GO:0090066 regulation of anatomical structure size	1	0.326550289	0.909	0.012	Biological Process	GO:0090066	regulation of anatomical structure size	0.326550289	0.490836425	0	0	1	83
GO:1905039 carboxylic acid transmembrane transport	1	0.326550289	0.909	0.012	Biological Process	GO:1905039	carboxylic acid transmembrane transport	0.326550289	0.490836425	0	0	1	83
GO:0030163 protein catabolic process	4	0.32743839	3.636	0.007	Biological Process	GO:0030163	protein catabolic process	0.32743839	0.491410629	0	0	4	609
GO:0008236 serine-type peptidase activity	2	0.276758604	1.869	0.01	Molecular Function	GO:0008236	serine-type peptidase activity	0.276758604	0.492372865	0	0	2	206
GO:0017171 serine hydrolase activity	2	0.276758604	1.869	0.01	Molecular Function	GO:0017171	serine hydrolase activity	0.276758604	0.492372865	0	0	2	206
GO:0006914 autophagy	1	0.329756221	0.909	0.012	Biological Process	GO:0006914	autophagy	0.329756221	0.492605062	0	0	1	84
GO:0019359 nicotinamide nucleotide biosynthetic process	1	0.329756221	0.909	0.012	Biological Process	GO:0019359	nicotinamide nucleotide biosynthetic process	0.329756221	0.492605062	0	0	1	84
GO:0061919 process utilizing autophagic mechanism	1	0.329756221	0.909	0.012	Biological Process	GO:0061919	process utilizing autophagic mechanism	0.329756221	0.492605062	0	0	1	84
GO:0016999 antibiotic metabolic process	2	0.332768813	1.818	0.008	Biological Process	GO:0016999	antibiotic metabolic process	0.332768813	0.493574909	0	0	2	250
GO:0009166 nucleotide catabolic process	1	0.332947029	0.909	0.012	Biological Process	GO:0009166	nucleotide catabolic process	0.332947029	0.493574909	0	0	1	85
GO:0044403 symbiont process	1	0.332947029	0.909	0.012	Biological Process	GO:0044403	symbiont process	0.332947029	0.493574909	0	0	1	85
GO:0048582 positive regulation of post-embryonic development	1	0.332947029	0.909	0.012	Biological Process	GO:0048582	positive regulation of post-embryonic development	0.332947029	0.493574909	0	0	1	85
GO:1903825 organic acid transmembrane transport	1	0.332947029	0.909	0.012	Biological Process	GO:1903825	organic acid transmembrane transport	0.332947029	0.493574909	0	0	1	85
GO:0000138 Golgi trans cisterna	1	0.374679556	0.87	0.012	Cellular Component	GO:0000138	Golgi trans cisterna	0.374679556	0.49448988	0	0	1	85
GO:0071705 nitrogen compound transport	7	0.334352304	6.364	0.006	Biological Process	GO:0071705	nitrogen compound transport	0.334352304	0.494902572	0	0	7	1189
GO:0008283 cell proliferation	1	0.336122784	0.909	0.012	Biological Process	GO:0008283	cell proliferation	0.336122784	0.496010978	0	0	1	86
GO:0010029 regulation of seed germination	1	0.336122784	0.909	0.012	Biological Process	GO:0010029	regulation of seed germination	0.336122784	0.496010978	0	0	1	86
GO:0000819 sister chromatid segregation	1	0.339283557	0.909	0.011	Biological Process	GO:0000819	sister chromatid segregation	0.339283557	0.498402926	0	0	1	87
GO:0009834 plant-type secondary cell wall biogenesis	1	0.339283557	0.909	0.011	Biological Process	GO:0009834	plant-type secondary cell wall biogenesis	0.339283557	0.498402926	0	0	1	87
GO:0019363 pyridine nucleotide biosynthetic process	1	0.339283557	0.909	0.011	Biological Process	GO:0019363	pyridine nucleotide biosynthetic process	0.339283557	0.498402926	0	0	1	87
GO:0042546 cell wall biogenesis	2	0.344867074	1.818	0.008	Biological Process	GO:0042546	cell wall biogenesis	0.344867074	0.505839772	0	0	2	257
GO:0032984 protein-containing complex disassembly	1	0.345560435	0.909	0.011	Biological Process	GO:0032984	protein-containing complex disassembly	0.345560435	0.506092281	0	0	1	89
GO:0044255 cellular lipid metabolic process	5	0.346294791	4.545	0.006	Biological Process	GO:0044255	cellular lipid metabolic process	0.346294791	0.506403979	0	0	5	817
GO:0006342 chromatin silencing	1	0.348676679	0.909	0.011	Biological Process	GO:0006342	chromatin silencing	0.348676679	0.508355939	0	0	1	90
GO:1900140 regulation of seedling development	1	0.348676679	0.909	0.011	Biological Process	GO:1900140	regulation of seedling development	0.348676679	0.508355939	0	0	1	90
GO:0051704 multi-organism process	11	0.349243818	10	0.006	Biological Process	GO:0051704	multi-organism process	0.349243818	0.508419411	0	0	11	1999
GO:0048285 organelle fission	2	0.350031315	1.818	0.008	Biological Process	GO:0048285	organelle fission	0.350031315	0.508803005	0	0	2	260
GO:0016747 transferase activity, transferring acyl groups other than amino-acyl groups	3	0.292391909	2.804	0.008	Molecular Function	GO:0016747	transferase activity, transferring acyl groups other than amino-acyl groups	0.292391909	0.511640364	0	0	3	376
GO:0016614 oxidoreductase activity, acting on CH-OH group of donors	2	0.293475904	1.869	0.009	Molecular Function	GO:0016614	oxidoreductase activity, acting on CH-OH group of donors	0.293475904	0.511640364	0	0	2	215
GO:0003746 translation elongation factor activity	1	0.293693725	0.935	0.014	Molecular Function	GO:0003746	translation elongation factor activity	0.293693725	0.511640364	0	0	1	69
GO:0016462 pyrophosphatase activity	7	0.295571981	6.542	0.007	Molecular Function	GO:0016462	pyrophosphatase activity	0.295571981	0.511640364	0	0	7	1076
GO:0016818 hydrolase activity, acting on acid anhydrides, in phosphorus-containing anhydrides	7	0.297971405	6.542	0.006	Molecular Function	GO:0016818	hydrolase activity, acting on acid anhydrides, in phosphorus-containing anhydrides	0.297971405	0.511640364	0	0	7	1079
GO:0016817 hydrolase activity, acting on acid anhydrides	7	0.301980379	6.542	0.006	Molecular Function	GO:0016817	hydrolase activity, acting on acid anhydrides	0.301980379	0.511640364	0	0	7	1084
GO:0004180 carboxypeptidase activity	1	0.304308975	0.935	0.014	Molecular Function	GO:0004180	carboxypeptidase activity	0.304308975	0.511640364	0	0	1	72
GO:0004197 cysteine-type endopeptidase activity	1	0.304308975	0.935	0.014	Molecular Function	GO:0004197	cysteine-type endopeptidase activity	0.304308975	0.511640364	0	0	1	72
GO:0004812 aminoacyl-tRNA ligase activity	1	0.304308975	0.935	0.014	Molecular Function	GO:0004812	aminoacyl-tRNA ligase activity	0.304308975	0.511640364	0	0	1	72
GO:0016875 ligase activity, forming carbon-oxygen bonds	1	0.304308975	0.935	0.014	Molecular Function	GO:0016875	ligase activity, forming carbon-oxygen bonds	0.304308975	0.511640364	0	0	1	72
GO:0015405 P-P-bond-hydrolysis-driven transmembrane transporter activity	2	0.306446094	1.869	0.009	Molecular Function	GO:0015405	P-P-bond-hydrolysis-driven transmembrane transporter activity	0.306446094	0.512418059	0	0	2	222
GO:0030684 preribosome	1	0.391749182	0.87	0.011	Cellular Component	GO:0030684	preribosome	0.391749182	0.514029274	0	0	1	90
GO:0015399 primary active transmembrane transporter activity	2	0.310144543	1.869	0.009	Molecular Function	GO:0015399	primary active transmembrane transporter activity	0.310144543	0.515783859	0	0	2	224
GO:0043170 macromolecule metabolic process	46	0.356054269	41.818	0.005	Biological Process	GO:0043170	macromolecule metabolic process	0.356054269	0.516784297	0	0	46	9200
GO:1901292 nucleoside phosphate catabolic process	1	0.357937459	0.909	0.011	Biological Process	GO:1901292	nucleoside phosphate catabolic process	0.357937459	0.518742199	0	0	1	93
GO:0003727 single-stranded RNA binding	1	0.314766153	0.935	0.013	Molecular Function	GO:0003727	single-stranded RNA binding	0.314766153	0.520640232	0	0	1	75
GO:0035770 ribonucleoprotein granule	1	0.401768389	0.87	0.011	Cellular Component	GO:0035770	ribonucleoprotein granule	0.401768389	0.521150997	0	0	1	93
GO:0036464 cytoplasmic ribonucleoprotein granule	1	0.401768389	0.87	0.011	Cellular Component	GO:0036464	cytoplasmic ribonucleoprotein granule	0.401768389	0.521150997	0	0	1	93
GO:0000281 mitotic cytokinesis	1	0.360995297	0.909	0.011	Biological Process	GO:0000281	mitotic cytokinesis	0.360995297	0.522394089	0	0	1	94
GO:0051015 actin filament binding	1	0.318217157	0.935	0.013	Molecular Function	GO:0051015	actin filament binding	0.318217157	0.523518548	0	0	1	76
GO:0052689 carboxylic ester hydrolase activity	2	0.321215876	1.869	0.009	Molecular Function	GO:0052689	carboxylic ester hydrolase activity	0.321215876	0.523538235	0	0	2	230
GO:0016410 N-acyltransferase activity	1	0.321650942	0.935	0.013	Molecular Function	GO:0016410	N-acyltransferase activity	0.321650942	0.523538235	0	0	1	77
GO:0051301 cell division	3	0.363992111	2.727	0.007	Biological Process	GO:0051301	cell division	0.363992111	0.525232662	0	0	3	453
GO:0045814 negative regulation of gene expression, epigenetic	1	0.364038704	0.909	0.011	Biological Process	GO:0045814	negative regulation of gene expression, epigenetic	0.364038704	0.525232662	0	0	1	95
GO:0000149 SNARE binding	1	0.325067594	0.935	0.013	Molecular Function	GO:0000149	SNARE binding	0.325067594	0.526299914	0	0	1	78
GO:0043648 dicarboxylic acid metabolic process	1	0.367067746	0.909	0.01	Biological Process	GO:0043648	dicarboxylic acid metabolic process	0.367067746	0.526473828	0	0	1	96
GO:0072525 pyridine-containing compound biosynthetic process	1	0.367067746	0.909	0.01	Biological Process	GO:0072525	pyridine-containing compound biosynthetic process	0.367067746	0.526473828	0	0	1	96
GO:1901136 carbohydrate derivative catabolic process	1	0.367067746	0.909	0.01	Biological Process	GO:1901136	carbohydrate derivative catabolic process	0.367067746	0.526473828	0	0	1	96
GO:1901264 carbohydrate derivative transport	1	0.367067746	0.909	0.01	Biological Process	GO:1901264	carbohydrate derivative transport	0.367067746	0.526473828	0	0	1	96
GO:0005789 endoplasmic reticulum membrane	4	0.41172834	3.478	0.007	Cellular Component	GO:0005789	endoplasmic reticulum membrane	0.41172834	0.531035984	0	0	4	593
GO:0098827 endoplasmic reticulum subcompartment	4	0.415447738	3.478	0.007	Cellular Component	GO:0098827	endoplasmic reticulum subcompartment	0.415447738	0.531392316	0	0	4	596
GO:0042175 nuclear outer membrane-endoplasmic reticulum membrane network	4	0.416686486	3.478	0.007	Cellular Component	GO:0042175	nuclear outer membrane-endoplasmic reticulum membrane network	0.416686486	0.531392316	0	0	4	597
GO:0002376 immune system process	3	0.373037123	2.727	0.007	Biological Process	GO:0002376	immune system process	0.373037123	0.533085184	0	0	3	460
GO:0009116 nucleoside metabolic process	1	0.373083009	0.909	0.01	Biological Process	GO:0009116	nucleoside metabolic process	0.373083009	0.533085184	0	0	1	98
GO:0006325 chromatin organization	3	0.375617404	2.727	0.006	Biological Process	GO:0006325	chromatin organization	0.375617404	0.533085184	0	0	3	462
GO:0050657 nucleic acid transport	1	0.376069362	0.909	0.01	Biological Process	GO:0050657	nucleic acid transport	0.376069362	0.533085184	0	0	1	99
GO:0050658 RNA transport	1	0.376069362	0.909	0.01	Biological Process	GO:0050658	RNA transport	0.376069362	0.533085184	0	0	1	99
GO:0051236 establishment of RNA localization	1	0.376069362	0.909	0.01	Biological Process	GO:0051236	establishment of RNA localization	0.376069362	0.533085184	0	0	1	99
GO:0051604 protein maturation	1	0.376069362	0.909	0.01	Biological Process	GO:0051604	protein maturation	0.376069362	0.533085184	0	0	1	99
GO:0061640 cytoskeleton-dependent cytokinesis	1	0.376069362	0.909	0.01	Biological Process	GO:0061640	cytoskeleton-dependent cytokinesis	0.376069362	0.533085184	0	0	1	99
GO:0016491 oxidoreductase activity	10	0.33270108	9.346	0.006	Molecular Function	GO:0016491	oxidoreductase activity	0.33270108	0.534024503	0	0	10	1677
GO:0050661 NADP binding	1	0.335215593	0.935	0.012	Molecular Function	GO:0050661	NADP binding	0.335215593	0.534024503	0	0	1	81
GO:0016798 hydrolase activity, acting on glycosyl bonds	4	0.335844511	3.738	0.007	Molecular Function	GO:0016798	hydrolase activity, acting on glycosyl bonds	0.335844511	0.534024503	0	0	4	583
GO:0015036 disulfide oxidoreductase activity	1	0.338564554	0.935	0.012	Molecular Function	GO:0015036	disulfide oxidoreductase activity	0.338564554	0.534024503	0	0	1	82
GO:0015932 nucleobase-containing compound transmembrane transporter activity	1	0.338564554	0.935	0.012	Molecular Function	GO:0015932	nucleobase-containing compound transmembrane transporter activity	0.338564554	0.534024503	0	0	1	82
GO:0010119 regulation of stomatal movement	1	0.379041619	0.909	0.01	Biological Process	GO:0010119	regulation of stomatal movement	0.379041619	0.536215555	0	0	1	100
GO:1901565 organonitrogen compound catabolic process	5	0.379382169	4.545	0.006	Biological Process	GO:1901565	organonitrogen compound catabolic process	0.379382169	0.536215555	0	0	5	852
GO:0015238 drug transmembrane transporter activity	1	0.341896801	0.935	0.012	Molecular Function	GO:0015238	drug transmembrane transporter activity	0.341896801	0.536514981	0	0	1	83
GO:0098687 chromosomal region	1	0.424514788	0.87	0.01	Cellular Component	GO:0098687	chromosomal region	0.424514788	0.538351156	0	0	1	100
GO:0009132 nucleoside diphosphate metabolic process	1	0.381999844	0.909	0.01	Biological Process	GO:0009132	nucleoside diphosphate metabolic process	0.381999844	0.539130594	0	0	1	101
GO:0004553 hydrolase activity, hydrolyzing O-glycosyl compounds	3	0.345947672	2.804	0.007	Molecular Function	GO:0004553	hydrolase activity, hydrolyzing O-glycosyl compounds	0.345947672	0.540101978	0	0	3	415
GO:0010565 regulation of cellular ketone metabolic process	1	0.387874464	0.909	0.01	Biological Process	GO:0010565	regulation of cellular ketone metabolic process	0.387874464	0.545834934	0	0	1	103
GO:0046467 membrane lipid biosynthetic process	1	0.387874464	0.909	0.01	Biological Process	GO:0046467	membrane lipid biosynthetic process	0.387874464	0.545834934	0	0	1	103
GO:0120025 plasma membrane bounded cell projection	1	0.433998803	0.87	0.01	Cellular Component	GO:0120025	plasma membrane bounded cell projection	0.433998803	0.547320713	0	0	1	103
GO:0000910 cytokinesis	1	0.390790988	0.909	0.01	Biological Process	GO:0000910	cytokinesis	0.390790988	0.548349783	0	0	1	104
GO:0007015 actin filament organization	1	0.390790988	0.909	0.01	Biological Process	GO:0007015	actin filament organization	0.390790988	0.548349783	0	0	1	104
GO:0044877 protein-containing complex binding	2	0.354149493	1.869	0.008	Molecular Function	GO:0044877	protein-containing complex binding	0.354149493	0.550100228	0	0	2	248
GO:0016836 hydro-lyase activity	1	0.358310203	0.935	0.011	Molecular Function	GO:0016836	hydro-lyase activity	0.358310203	0.550969458	0	0	1	88
GO:0043021 ribonucleoprotein complex binding	1	0.358310203	0.935	0.011	Molecular Function	GO:0043021	ribonucleoprotein complex binding	0.358310203	0.550969458	0	0	1	88
GO:0005856 cytoskeleton	3	0.43952585	2.609	0.007	Cellular Component	GO:0005856	cytoskeleton	0.43952585	0.551228552	0	0	3	442
GO:0005819 spindle	1	0.443327858	0.87	0.009	Cellular Component	GO:0005819	spindle	0.443327858	0.552941889	0	0	1	106
GO:0006813 potassium ion transport	1	0.396582792	0.909	0.009	Biological Process	GO:0006813	potassium ion transport	0.396582792	0.555673724	0	0	1	106
GO:1901505 carbohydrate derivative transmembrane transporter activity	1	0.364761427	0.935	0.011	Molecular Function	GO:1901505	carbohydrate derivative transmembrane transporter activity	0.364761427	0.555895125	0	0	1	90
GO:0042623 ATPase activity, coupled	3	0.365146797	2.804	0.007	Molecular Function	GO:0042623	ATPase activity, coupled	0.365146797	0.555895125	0	0	3	429
GO:0016746 transferase activity, transferring acyl groups	3	0.369251257	2.804	0.007	Molecular Function	GO:0016746	transferase activity, transferring acyl groups	0.369251257	0.559360816	0	0	3	432
GO:0048584 positive regulation of response to stimulus	2	0.400834387	1.818	0.007	Biological Process	GO:0048584	positive regulation of response to stimulus	0.400834387	0.560821599	0	0	2	290
GO:0015031 protein transport	5	0.402081647	4.545	0.006	Biological Process	GO:0015031	protein transport	0.402081647	0.561282682	0	0	5	876
GO:0044242 cellular lipid catabolic process	1	0.402320028	0.909	0.009	Biological Process	GO:0044242	cellular lipid catabolic process	0.402320028	0.561282682	0	0	1	108
GO:0005770 late endosome	1	0.452504463	0.87	0.009	Cellular Component	GO:0005770	late endosome	0.452504463	0.56130335	0	0	1	109
GO:0006403 RNA localization	1	0.405168342	0.909	0.009	Biological Process	GO:0006403	RNA localization	0.405168342	0.562124982	0	0	1	109
GO:0031349 positive regulation of defense response	1	0.405168342	0.909	0.009	Biological Process	GO:0031349	positive regulation of defense response	0.405168342	0.562124982	0	0	1	109
GO:0140014 mitotic nuclear division	1	0.405168342	0.909	0.009	Biological Process	GO:0140014	mitotic nuclear division	0.405168342	0.562124982	0	0	1	109
GO:0071215 cellular response to abscisic acid stimulus	2	0.405818344	1.818	0.007	Biological Process	GO:0071215	cellular response to abscisic acid stimulus	0.405818344	0.562124982	0	0	2	293
GO:0097306 cellular response to alcohol	2	0.405818344	1.818	0.007	Biological Process	GO:0097306	cellular response to alcohol	0.405818344	0.562124982	0	0	2	293
GO:0031226 intrinsic component of plasma membrane	2	0.456888364	1.739	0.007	Cellular Component	GO:0031226	intrinsic component of plasma membrane	0.456888364	0.563661188	0	0	2	280
GO:0022402 cell cycle process	3	0.410220644	2.727	0.006	Biological Process	GO:0022402	cell cycle process	0.410220644	0.567413455	0	0	3	489
GO:0003724 RNA helicase activity	1	0.377471736	0.935	0.011	Molecular Function	GO:0003724	RNA helicase activity	0.377471736	0.568996805	0	0	1	94
GO:0030036 actin cytoskeleton organization	1	0.41363283	0.909	0.009	Biological Process	GO:0030036	actin cytoskeleton organization	0.41363283	0.571319315	0	0	1	112
GO:0048589 developmental growth	3	0.416571316	2.727	0.006	Biological Process	GO:0048589	developmental growth	0.416571316	0.574560721	0	0	3	494
GO:0045184 establishment of protein localization	5	0.417176843	4.545	0.006	Biological Process	GO:0045184	establishment of protein localization	0.417176843	0.574579737	0	0	5	892
GO:0051276 chromosome organization	4	0.418991552	3.636	0.006	Biological Process	GO:0051276	chromosome organization	0.418991552	0.575745869	0	0	4	694
GO:0009967 positive regulation of signal transduction	1	0.419209402	0.909	0.009	Biological Process	GO:0009967	positive regulation of signal transduction	0.419209402	0.575745869	0	0	1	114
GO:0007049 cell cycle	4	0.420059498	3.636	0.006	Biological Process	GO:0007049	cell cycle	0.420059498	0.575901149	0	0	4	695
GO:0023056 positive regulation of signaling	1	0.421977948	0.909	0.009	Biological Process	GO:0023056	positive regulation of signaling	0.421977948	0.575901149	0	0	1	115
GO:0090150 establishment of protein localization to membrane	1	0.421977948	0.909	0.009	Biological Process	GO:0090150	establishment of protein localization to membrane	0.421977948	0.575901149	0	0	1	115
GO:0071554 cell wall organization or biogenesis	4	0.422194111	3.636	0.006	Biological Process	GO:0071554	cell wall organization or biogenesis	0.422194111	0.575901149	0	0	4	697
GO:0009826 unidimensional cell growth	2	0.422287969	1.818	0.007	Biological Process	GO:0009826	unidimensional cell growth	0.422287969	0.575901149	0	0	2	303
GO:0009741 response to brassinosteroid	1	0.427475867	0.909	0.009	Biological Process	GO:0009741	response to brassinosteroid	0.427475867	0.581298677	0	0	1	117
GO:0051240 positive regulation of multicellular organismal process	1	0.427475867	0.909	0.009	Biological Process	GO:0051240	positive regulation of multicellular organismal process	0.427475867	0.581298677	0	0	1	117
GO:0009787 regulation of abscisic acid-activated signaling pathway	1	0.430205363	0.909	0.008	Biological Process	GO:0009787	regulation of abscisic acid-activated signaling pathway	0.430205363	0.581298677	0	0	1	118
GO:0010647 positive regulation of cell communication	1	0.430205363	0.909	0.008	Biological Process	GO:0010647	positive regulation of cell communication	0.430205363	0.581298677	0	0	1	118
GO:1901419 regulation of response to alcohol	1	0.430205363	0.909	0.008	Biological Process	GO:1901419	regulation of response to alcohol	0.430205363	0.581298677	0	0	1	118
GO:1905957 regulation of cellular response to alcohol	1	0.430205363	0.909	0.008	Biological Process	GO:1905957	regulation of cellular response to alcohol	0.430205363	0.581298677	0	0	1	118
GO:0010608 posttranscriptional regulation of gene expression	2	0.430436405	1.818	0.006	Biological Process	GO:0010608	posttranscriptional regulation of gene expression	0.430436405	0.581298677	0	0	2	308
GO:0015833 peptide transport	5	0.431279611	4.545	0.006	Biological Process	GO:0015833	peptide transport	0.431279611	0.581420784	0	0	5	907
GO:0016143 S-glycoside metabolic process	1	0.432921964	0.909	0.008	Biological Process	GO:0016143	S-glycoside metabolic process	0.432921964	0.581420784	0	0	1	119
GO:0019757 glycosinolate metabolic process	1	0.432921964	0.909	0.008	Biological Process	GO:0019757	glycosinolate metabolic process	0.432921964	0.581420784	0	0	1	119
GO:0019760 glucosinolate metabolic process	1	0.432921964	0.909	0.008	Biological Process	GO:0019760	glucosinolate metabolic process	0.432921964	0.581420784	0	0	1	119
GO:0030029 actin filament-based process	1	0.43562573	0.909	0.008	Biological Process	GO:0030029	actin filament-based process	0.43562573	0.583438046	0	0	1	120
GO:0042743 hydrogen peroxide metabolic process	1	0.43562573	0.909	0.008	Biological Process	GO:0042743	hydrogen peroxide metabolic process	0.43562573	0.583438046	0	0	1	120
GO:1901698 response to nitrogen compound	2	0.438524812	1.818	0.006	Biological Process	GO:1901698	response to nitrogen compound	0.438524812	0.586511835	0	0	2	313
GO:0016192 vesicle-mediated transport	3	0.442998363	2.727	0.006	Biological Process	GO:0016192	vesicle-mediated transport	0.442998363	0.59168007	0	0	3	515
GO:0031969 chloroplast membrane	2	0.482209311	1.739	0.007	Cellular Component	GO:0031969	chloroplast membrane	0.482209311	0.591683857	0	0	2	294
GO:0045088 regulation of innate immune response	1	0.443660619	0.909	0.008	Biological Process	GO:0045088	regulation of innate immune response	0.443660619	0.591750633	0	0	1	123
GO:0014070 response to organic cyclic compound	2	0.444951178	1.818	0.006	Biological Process	GO:0014070	response to organic cyclic compound	0.444951178	0.592657879	0	0	2	317
GO:0098657 import into cell	1	0.446313644	0.909	0.008	Biological Process	GO:0098657	import into cell	0.446313644	0.593162117	0	0	1	124
GO:0007010 cytoskeleton organization	2	0.446551501	1.818	0.006	Biological Process	GO:0007010	cytoskeleton organization	0.446551501	0.593162117	0	0	2	318
GO:0005509 calcium ion binding	2	0.397164927	1.869	0.007	Molecular Function	GO:0005509	calcium ion binding	0.397164927	0.595747391	0	0	2	272
GO:0042886 amide transport	5	0.449981084	4.545	0.005	Biological Process	GO:0042886	amide transport	0.449981084	0.596579945	0	0	5	927
GO:0006643 membrane lipid metabolic process	1	0.451582142	0.909	0.008	Biological Process	GO:0006643	membrane lipid metabolic process	0.451582142	0.596579945	0	0	1	126
GO:0045017 glycerolipid biosynthetic process	1	0.451582142	0.909	0.008	Biological Process	GO:0045017	glycerolipid biosynthetic process	0.451582142	0.596579945	0	0	1	126
GO:0098813 nuclear chromosome segregation	1	0.451582142	0.909	0.008	Biological Process	GO:0098813	nuclear chromosome segregation	0.451582142	0.596579945	0	0	1	126
GO:0042995 cell projection	1	0.493384402	0.87	0.008	Cellular Component	GO:0042995	cell projection	0.493384402	0.599586877	0	0	1	123
GO:0042170 plastid membrane	2	0.496353687	1.739	0.007	Cellular Component	GO:0042170	plastid membrane	0.496353687	0.599586877	0	0	2	302
GO:0015630 microtubule cytoskeleton	2	0.501595136	1.739	0.007	Cellular Component	GO:0015630	microtubule cytoskeleton	0.501595136	0.599586877	0	0	2	305
GO:0005802 trans-Golgi network	2	0.503334595	1.739	0.007	Cellular Component	GO:0005802	trans-Golgi network	0.503334595	0.599586877	0	0	2	306
GO:0019867 outer membrane	1	0.504498209	0.87	0.008	Cellular Component	GO:0019867	outer membrane	0.504498209	0.599586877	0	0	1	127
GO:0031968 organelle outer membrane	1	0.504498209	0.87	0.008	Cellular Component	GO:0031968	organelle outer membrane	0.504498209	0.599586877	0	0	1	127
GO:0031301 integral component of organelle membrane	1	0.507238685	0.87	0.008	Cellular Component	GO:0031301	integral component of organelle membrane	0.507238685	0.59970407	0	0	1	128
GO:0051094 positive regulation of developmental process	1	0.45680096	0.909	0.008	Biological Process	GO:0051094	positive regulation of developmental process	0.45680096	0.601021317	0	0	1	128
GO:0062012 regulation of small molecule metabolic process	1	0.45680096	0.909	0.008	Biological Process	GO:0062012	regulation of small molecule metabolic process	0.45680096	0.601021317	0	0	1	128
GO:0070838 divalent metal ion transport	1	0.45680096	0.909	0.008	Biological Process	GO:0070838	divalent metal ion transport	0.45680096	0.601021317	0	0	1	128
GO:0031300 intrinsic component of organelle membrane	1	0.51267464	0.87	0.008	Cellular Component	GO:0031300	intrinsic component of organelle membrane	0.51267464	0.60299038	0	0	1	130
GO:0045892 negative regulation of transcription, DNA-templated	2	0.460839049	1.818	0.006	Biological Process	GO:0045892	negative regulation of transcription, DNA-templated	0.460839049	0.604311622	0	0	2	327
GO:0050776 regulation of immune response	1	0.461970562	0.909	0.008	Biological Process	GO:0050776	regulation of immune response	0.461970562	0.604311622	0	0	1	130
GO:0072511 divalent inorganic cation transport	1	0.461970562	0.909	0.008	Biological Process	GO:0072511	divalent inorganic cation transport	0.461970562	0.604311622	0	0	1	130
GO:1902679 negative regulation of RNA biosynthetic process	2	0.462413527	1.818	0.006	Biological Process	GO:1902679	negative regulation of RNA biosynthetic process	0.462413527	0.604311622	0	0	2	328
GO:1903507 negative regulation of nucleic acid-templated transcription	2	0.462413527	1.818	0.006	Biological Process	GO:1903507	negative regulation of nucleic acid-templated transcription	0.462413527	0.604311622	0	0	2	328
GO:0044265 cellular macromolecule catabolic process	4	0.466538022	3.636	0.005	Biological Process	GO:0044265	cellular macromolecule catabolic process	0.466538022	0.608824878	0	0	4	739
GO:0051188 cofactor biosynthetic process	2	0.467121045	1.818	0.006	Biological Process	GO:0051188	cofactor biosynthetic process	0.467121045	0.608824878	0	0	2	331
GO:0051539 4 iron, 4 sulfur cluster binding	1	0.408155866	0.935	0.01	Molecular Function	GO:0051539	4 iron, 4 sulfur cluster binding	0.408155866	0.609247293	0	0	1	104
GO:0034613 cellular protein localization	4	0.471744003	3.636	0.005	Biological Process	GO:0034613	cellular protein localization	0.471744003	0.613749933	0	0	4	744
GO:0030258 lipid modification	1	0.472163955	0.909	0.007	Biological Process	GO:0030258	lipid modification	0.472163955	0.613749933	0	0	1	134
GO:0046434 organophosphate catabolic process	1	0.477188652	0.909	0.007	Biological Process	GO:0046434	organophosphate catabolic process	0.477188652	0.619452114	0	0	1	136
GO:0009705 plant-type vacuole membrane	1	0.531236516	0.87	0.007	Cellular Component	GO:0009705	plant-type vacuole membrane	0.531236516	0.621433287	0	0	1	137
GO:0005635 nuclear envelope	1	0.533830357	0.87	0.007	Cellular Component	GO:0005635	nuclear envelope	0.533830357	0.621433287	0	0	1	138
GO:0051253 negative regulation of RNA metabolic process	2	0.479555943	1.818	0.006	Biological Process	GO:0051253	negative regulation of RNA metabolic process	0.479555943	0.621694019	0	0	2	339
GO:0000278 mitotic cell cycle	2	0.481098016	1.818	0.006	Biological Process	GO:0000278	mitotic cell cycle	0.481098016	0.622861564	0	0	2	340
GO:0031225 anchored component of membrane	2	0.545541774	1.739	0.006	Cellular Component	GO:0031225	anchored component of membrane	0.545541774	0.629824377	0	0	2	331
GO:0000790 nuclear chromatin	1	0.546587675	0.87	0.007	Cellular Component	GO:0000790	nuclear chromatin	0.546587675	0.629824377	0	0	1	143
GO:0002682 regulation of immune system process	1	0.489543982	0.909	0.007	Biological Process	GO:0002682	regulation of immune system process	0.489543982	0.632952339	0	0	1	141
GO:0009308 amine metabolic process	1	0.491980103	0.909	0.007	Biological Process	GO:0009308	amine metabolic process	0.491980103	0.635256224	0	0	1	142
GO:0010150 leaf senescence	1	0.494404704	0.909	0.007	Biological Process	GO:0010150	leaf senescence	0.494404704	0.637539133	0	0	1	143
GO:0060560 developmental growth involved in morphogenesis	2	0.496365496	1.818	0.006	Biological Process	GO:0060560	developmental growth involved in morphogenesis	0.496365496	0.639218696	0	0	2	350
GO:0007059 chromosome segregation	1	0.501609917	0.909	0.007	Biological Process	GO:0007059	chromosome segregation	0.501609917	0.644263531	0	0	1	146
GO:0009553 embryo sac development	1	0.501609917	0.909	0.007	Biological Process	GO:0009553	embryo sac development	0.501609917	0.644263531	0	0	1	146
GO:0051082 unfolded protein binding	1	0.43734103	0.935	0.009	Molecular Function	GO:0051082	unfolded protein binding	0.43734103	0.649268466	0	0	1	114
GO:0008238 exopeptidase activity	1	0.443004636	0.935	0.009	Molecular Function	GO:0008238	exopeptidase activity	0.443004636	0.649268466	0	0	1	116
GO:0001883 purine nucleoside binding	2	0.45071463	1.869	0.007	Molecular Function	GO:0001883	purine nucleoside binding	0.45071463	0.649268466	0	0	2	303
GO:0005525 GTP binding	2	0.45071463	1.869	0.007	Molecular Function	GO:0005525	GTP binding	0.45071463	0.649268466	0	0	2	303
GO:0032550 purine ribonucleoside binding	2	0.45071463	1.869	0.007	Molecular Function	GO:0032550	purine ribonucleoside binding	0.45071463	0.649268466	0	0	2	303
GO:0003779 actin binding	1	0.451394317	0.935	0.008	Molecular Function	GO:0003779	actin binding	0.451394317	0.649268466	0	0	1	119
GO:0016651 oxidoreductase activity, acting on NAD(P)H	1	0.451394317	0.935	0.008	Molecular Function	GO:0016651	oxidoreductase activity, acting on NAD(P)H	0.451394317	0.649268466	0	0	1	119
GO:0016853 isomerase activity	2	0.454079753	1.869	0.007	Molecular Function	GO:0016853	isomerase activity	0.454079753	0.649268466	0	0	2	305
GO:0016667 oxidoreductase activity, acting on a sulfur group of donors	1	0.454162961	0.935	0.008	Molecular Function	GO:0016667	oxidoreductase activity, acting on a sulfur group of donors	0.454162961	0.649268466	0	0	1	120
GO:0016874 ligase activity	2	0.457433289	1.869	0.007	Molecular Function	GO:0016874	ligase activity	0.457433289	0.649268466	0	0	2	307
GO:0001882 nucleoside binding	2	0.460775131	1.869	0.006	Molecular Function	GO:0001882	nucleoside binding	0.460775131	0.649268466	0	0	2	309
GO:0032549 ribonucleoside binding	2	0.460775131	1.869	0.006	Molecular Function	GO:0032549	ribonucleoside binding	0.460775131	0.649268466	0	0	2	309
GO:0008289 lipid binding	2	0.464105177	1.869	0.006	Molecular Function	GO:0008289	lipid binding	0.464105177	0.649268466	0	0	2	311
GO:0016810 hydrolase activity, acting on carbon-nitrogen (but not peptide) bonds	1	0.467799913	0.935	0.008	Molecular Function	GO:0016810	hydrolase activity, acting on carbon-nitrogen (but not peptide) bonds	0.467799913	0.649268466	0	0	1	125
GO:0008514 organic anion transmembrane transporter activity	1	0.470486524	0.935	0.008	Molecular Function	GO:0008514	organic anion transmembrane transporter activity	0.470486524	0.649268466	0	0	1	126
GO:0003953 NAD+ nucleosidase activity	1	0.473159699	0.935	0.008	Molecular Function	GO:0003953	NAD+ nucleosidase activity	0.473159699	0.649268466	0	0	1	127
GO:0050135 NAD(P)+ nucleosidase activity	1	0.473159699	0.935	0.008	Molecular Function	GO:0050135	NAD(P)+ nucleosidase activity	0.473159699	0.649268466	0	0	1	127
GO:0061809 NAD+ nucleotidase, cyclic ADP-ribose generating	1	0.473159699	0.935	0.008	Molecular Function	GO:0061809	NAD+ nucleotidase, cyclic ADP-ribose generating	0.473159699	0.649268466	0	0	1	127
GO:0090693 plant organ senescence	1	0.50871337	0.909	0.007	Biological Process	GO:0090693	plant organ senescence	0.50871337	0.65202323	0	0	1	149
GO:0048583 regulation of response to stimulus	4	0.509665944	3.636	0.005	Biological Process	GO:0048583	regulation of response to stimulus	0.509665944	0.65202323	0	0	4	781
GO:0070727 cellular macromolecule localization	4	0.509665944	3.636	0.005	Biological Process	GO:0070727	cellular macromolecule localization	0.509665944	0.65202323	0	0	4	781
GO:0044430 cytoskeletal part	2	0.569655936	1.739	0.006	Cellular Component	GO:0044430	cytoskeletal part	0.569655936	0.653090391	0	0	2	346
GO:0006886 intracellular protein transport	3	0.51336786	2.727	0.005	Biological Process	GO:0006886	intracellular protein transport	0.51336786	0.654205738	0	0	3	573
GO:0008643 carbohydrate transport	1	0.513393175	0.909	0.007	Biological Process	GO:0008643	carbohydrate transport	0.513393175	0.654205738	0	0	1	151
GO:0010118 stomatal movement	1	0.513393175	0.909	0.007	Biological Process	GO:0010118	stomatal movement	0.513393175	0.654205738	0	0	1	151
GO:0004252 serine-type endopeptidase activity	1	0.481099271	0.935	0.008	Molecular Function	GO:0004252	serine-type endopeptidase activity	0.481099271	0.655100405	0	0	1	130
GO:0019001 guanyl nucleotide binding	2	0.483832325	1.869	0.006	Molecular Function	GO:0019001	guanyl nucleotide binding	0.483832325	0.655100405	0	0	2	323
GO:0032561 guanyl ribonucleotide binding	2	0.483832325	1.869	0.006	Molecular Function	GO:0032561	guanyl ribonucleotide binding	0.483832325	0.655100405	0	0	2	323
GO:0009664 plant-type cell wall organization	1	0.518028803	0.909	0.007	Biological Process	GO:0009664	plant-type cell wall organization	0.518028803	0.659247665	0	0	1	153
GO:0045934 negative regulation of nucleobase-containing compound metabolic process	2	0.521664668	1.818	0.005	Biological Process	GO:0045934	negative regulation of nucleobase-containing compound metabolic process	0.521664668	0.663005749	0	0	2	367
GO:0046942 carboxylic acid transport	1	0.524900318	0.909	0.006	Biological Process	GO:0046942	carboxylic acid transport	0.524900318	0.666246025	0	0	1	156
GO:0015849 organic acid transport	1	0.529427305	0.909	0.006	Biological Process	GO:0015849	organic acid transport	0.529427305	0.671114769	0	0	1	158
GO:0042180 cellular ketone metabolic process	1	0.531674743	0.909	0.006	Biological Process	GO:0042180	cellular ketone metabolic process	0.531674743	0.673084975	0	0	1	159
GO:0051641 cellular localization	5	0.532693078	4.545	0.005	Biological Process	GO:0051641	cellular localization	0.532693078	0.673496066	0	0	5	1018
GO:0009743 response to carbohydrate	1	0.538353438	0.909	0.006	Biological Process	GO:0009743	response to carbohydrate	0.538353438	0.679767475	0	0	1	162
GO:0022804 active transmembrane transporter activity	3	0.505226434	2.804	0.006	Molecular Function	GO:0022804	active transmembrane transporter activity	0.505226434	0.681054136	0	0	3	535
GO:0009267 cellular response to starvation	1	0.54275338	0.909	0.006	Biological Process	GO:0009267	cellular response to starvation	0.54275338	0.684433158	0	0	1	164
GO:0046148 pigment biosynthetic process	1	0.544937742	0.909	0.006	Biological Process	GO:0046148	pigment biosynthetic process	0.544937742	0.68629643	0	0	1	165
GO:1903046 meiotic cell cycle process	1	0.547111764	0.909	0.006	Biological Process	GO:1903046	meiotic cell cycle process	0.547111764	0.688141869	0	0	1	166
GO:0015980 energy derivation by oxidation of organic compounds	1	0.551428979	0.909	0.006	Biological Process	GO:0015980	energy derivation by oxidation of organic compounds	0.551428979	0.692648882	0	0	1	168
GO:0048608 reproductive structure development	6	0.555349254	5.455	0.005	Biological Process	GO:0048608	reproductive structure development	0.555349254	0.692648882	0	0	6	1260
GO:0006486 protein glycosylation	1	0.55570541	0.909	0.006	Biological Process	GO:0006486	protein glycosylation	0.55570541	0.692648882	0	0	1	170
GO:0009845 seed germination	1	0.55570541	0.909	0.006	Biological Process	GO:0009845	seed germination	0.55570541	0.692648882	0	0	1	170
GO:0043413 macromolecule glycosylation	1	0.55570541	0.909	0.006	Biological Process	GO:0043413	macromolecule glycosylation	0.55570541	0.692648882	0	0	1	170
GO:0090502 RNA phosphodiester bond hydrolysis, endonucleolytic	1	0.55570541	0.909	0.006	Biological Process	GO:0090502	RNA phosphodiester bond hydrolysis, endonucleolytic	0.55570541	0.692648882	0	0	1	170
GO:0006725 cellular aromatic compound metabolic process	26	0.556318875	23.636	0.005	Biological Process	GO:0006725	cellular aromatic compound metabolic process	0.556318875	0.692648882	0	0	26	5527
GO:0048366 leaf development	2	0.557316439	1.818	0.005	Biological Process	GO:0048366	leaf development	0.557316439	0.692648882	0	0	2	392
GO:0061458 reproductive system development	6	0.557710867	5.455	0.005	Biological Process	GO:0061458	reproductive system development	0.557710867	0.692648882	0	0	6	1263
GO:0009101 glycoprotein biosynthetic process	1	0.557828451	0.909	0.006	Biological Process	GO:0009101	glycoprotein biosynthetic process	0.557828451	0.692648882	0	0	1	171
GO:0097435 supramolecular fiber organization	1	0.562044421	0.909	0.006	Biological Process	GO:0097435	supramolecular fiber organization	0.562044421	0.696319831	0	0	1	173
GO:0008104 protein localization	5	0.562219102	4.545	0.005	Biological Process	GO:0008104	protein localization	0.562219102	0.696319831	0	0	5	1052
GO:0051020 GTPase binding	1	0.51905358	0.935	0.007	Molecular Function	GO:0051020	GTPase binding	0.51905358	0.696624542	0	0	1	145
GO:0044550 secondary metabolite biosynthetic process	1	0.564137444	0.909	0.006	Biological Process	GO:0044550	secondary metabolite biosynthetic process	0.564137444	0.697805679	0	0	1	174
GO:0044459 plasma membrane part	2	0.61509884	1.739	0.005	Cellular Component	GO:0044459	plasma membrane part	0.61509884	0.701645411	0	0	2	376
GO:2000113 negative regulation of cellular macromolecule biosynthetic process	2	0.568325404	1.818	0.005	Biological Process	GO:2000113	negative regulation of cellular macromolecule biosynthetic process	0.568325404	0.702091562	0	0	2	400
GO:0010558 negative regulation of macromolecule biosynthetic process	2	0.569687756	1.818	0.005	Biological Process	GO:0010558	negative regulation of macromolecule biosynthetic process	0.569687756	0.702880319	0	0	2	401
GO:0006820 anion transport	2	0.571047041	1.818	0.005	Biological Process	GO:0006820	anion transport	0.571047041	0.703524413	0	0	2	402
GO:0006793 phosphorus metabolic process	12	0.571658869	10.909	0.005	Biological Process	GO:0006793	phosphorus metabolic process	0.571658869	0.703524413	0	0	12	2576
GO:0016709 oxidoreductase activity, acting on paired donors, with incorporation or reduction of molecular oxygen, NAD(P)H as one donor, and incorporation of one atom of oxygen	1	0.533453321	0.935	0.007	Molecular Function	GO:0016709	oxidoreductase activity, acting on paired donors, with incorporation or reduction of molecular oxygen, NAD(P)H as one donor, and incorporation of one atom of oxygen	0.533453321	0.709776137	0	0	1	151
GO:0008047 enzyme activator activity	1	0.535811398	0.935	0.007	Molecular Function	GO:0008047	enzyme activator activity	0.535811398	0.709776137	0	0	1	152
GO:0019842 vitamin binding	1	0.535811398	0.935	0.007	Molecular Function	GO:0019842	vitamin binding	0.535811398	0.709776137	0	0	1	152
GO:0008234 cysteine-type peptidase activity	1	0.538157667	0.935	0.007	Molecular Function	GO:0008234	cysteine-type peptidase activity	0.538157667	0.709811406	0	0	1	153
GO:0000287 magnesium ion binding	1	0.540492188	0.935	0.006	Molecular Function	GO:0000287	magnesium ion binding	0.540492188	0.709830942	0	0	1	154
GO:0005759 mitochondrial matrix	1	0.626700737	0.87	0.006	Cellular Component	GO:0005759	mitochondrial matrix	0.626700737	0.711305337	0	0	1	178
GO:0000226 microtubule cytoskeleton organization	1	0.58052867	0.909	0.005	Biological Process	GO:0000226	microtubule cytoskeleton organization	0.58052867	0.712633803	0	0	1	182
GO:0009100 glycoprotein metabolic process	1	0.58052867	0.909	0.005	Biological Process	GO:0009100	glycoprotein metabolic process	0.58052867	0.712633803	0	0	1	182
GO:0009793 embryo development ending in seed dormancy	2	0.583142337	1.818	0.005	Biological Process	GO:0009793	embryo development ending in seed dormancy	0.583142337	0.714938396	0	0	2	411
GO:0004175 endopeptidase activity	2	0.550746549	1.869	0.005	Molecular Function	GO:0004175	endopeptidase activity	0.550746549	0.717142315	0	0	2	366
GO:0016758 transferase activity, transferring hexosyl groups	2	0.550746549	1.869	0.005	Molecular Function	GO:0016758	transferase activity, transferring hexosyl groups	0.550746549	0.717142315	0	0	2	366
GO:0003006 developmental process involved in reproduction	7	0.586729356	6.364	0.005	Biological Process	GO:0003006	developmental process involved in reproduction	0.586729356	0.71842901	0	0	7	1519
GO:0140101 catalytic activity, acting on a tRNA	1	0.554255824	0.935	0.006	Molecular Function	GO:0140101	catalytic activity, acting on a tRNA	0.554255824	0.718653738	0	0	1	160
GO:0030246 carbohydrate binding	2	0.561056096	1.869	0.005	Molecular Function	GO:0030246	carbohydrate binding	0.561056096	0.721429756	0	0	2	373
GO:0070011 peptidase activity, acting on L-amino acid peptides	3	0.561112032	2.804	0.005	Molecular Function	GO:0070011	peptidase activity, acting on L-amino acid peptides	0.561112032	0.721429756	0	0	3	581
GO:0031669 cellular response to nutrient levels	1	0.592419857	0.909	0.005	Biological Process	GO:0031669	cellular response to nutrient levels	0.592419857	0.724483226	0	0	1	188
GO:0033036 macromolecule localization	6	0.595455111	5.455	0.005	Biological Process	GO:0033036	macromolecule localization	0.595455111	0.726469892	0	0	6	1312
GO:0098542 defense response to other organism	5	0.595754889	4.545	0.005	Biological Process	GO:0098542	defense response to other organism	0.595754889	0.726469892	0	0	5	1092
GO:0031327 negative regulation of cellular biosynthetic process	2	0.596288881	1.818	0.005	Biological Process	GO:0031327	negative regulation of cellular biosynthetic process	0.596288881	0.726469892	0	0	2	421
GO:0016799 hydrolase activity, hydrolyzing N-glycosyl compounds	1	0.569797919	0.935	0.006	Molecular Function	GO:0016799	hydrolase activity, hydrolyzing N-glycosyl compounds	0.569797919	0.727369965	0	0	1	167
GO:0016835 carbon-oxygen lyase activity	1	0.574139064	0.935	0.006	Molecular Function	GO:0016835	carbon-oxygen lyase activity	0.574139064	0.727369965	0	0	1	169
GO:0000166 nucleotide binding	16	0.575240299	14.953	0.005	Molecular Function	GO:0000166	nucleotide binding	0.575240299	0.727369965	0	0	16	3251
GO:1901265 nucleoside phosphate binding	16	0.575240299	14.953	0.005	Molecular Function	GO:1901265	nucleoside phosphate binding	0.575240299	0.727369965	0	0	16	3251
GO:0005515 protein binding	40	0.577635669	37.383	0.005	Molecular Function	GO:0005515	protein binding	0.577635669	0.727393065	0	0	40	8074
GO:0000902 cell morphogenesis	2	0.598881155	1.818	0.005	Biological Process	GO:0000902	cell morphogenesis	0.598881155	0.727801754	0	0	2	423
GO:0080134 regulation of response to stress	2	0.598881155	1.818	0.005	Biological Process	GO:0080134	regulation of response to stress	0.598881155	0.727801754	0	0	2	423
GO:0003682 chromatin binding	1	0.580569539	0.935	0.006	Molecular Function	GO:0003682	chromatin binding	0.580569539	0.728091307	0	0	1	172
GO:0000325 plant-type vacuole	1	0.644923544	0.87	0.005	Cellular Component	GO:0000325	plant-type vacuole	0.644923544	0.72834649	0	0	1	187
GO:0046777 protein autophosphorylation	1	0.600161117	0.909	0.005	Biological Process	GO:0046777	protein autophosphorylation	0.600161117	0.728445556	0	0	1	192
GO:1901360 organic cyclic compound metabolic process	26	0.601443644	23.636	0.005	Biological Process	GO:1901360	organic cyclic compound metabolic process	0.601443644	0.72909086	0	0	26	5636
GO:0036094 small molecule binding	17	0.584933181	15.888	0.005	Molecular Function	GO:0036094	small molecule binding	0.584933181	0.730569606	0	0	17	3472
GO:0009890 negative regulation of biosynthetic process	2	0.604028645	1.818	0.005	Biological Process	GO:0009890	negative regulation of biosynthetic process	0.604028645	0.73131149	0	0	2	427
GO:0010008 endosome membrane	1	0.650799635	0.87	0.005	Cellular Component	GO:0010008	endosome membrane	0.650799635	0.731344144	0	0	1	190
GO:0042802 identical protein binding	2	0.59097651	1.869	0.005	Molecular Function	GO:0042802	identical protein binding	0.59097651	0.731862294	0	0	2	394
GO:0051536 iron-sulfur cluster binding	1	0.593143297	0.935	0.006	Molecular Function	GO:0051536	iron-sulfur cluster binding	0.593143297	0.731862294	0	0	1	178
GO:0051540 metal cluster binding	1	0.593143297	0.935	0.006	Molecular Function	GO:0051540	metal cluster binding	0.593143297	0.731862294	0	0	1	178
GO:0016049 cell growth	2	0.605307798	1.818	0.005	Biological Process	GO:0016049	cell growth	0.605307798	0.731947537	0	0	2	428
GO:0009753 response to jasmonic acid	1	0.607756657	0.909	0.005	Biological Process	GO:0009753	response to jasmonic acid	0.607756657	0.733330523	0	0	1	196
GO:0051716 cellular response to stimulus	15	0.607961968	13.636	0.005	Biological Process	GO:0051716	cellular response to stimulus	0.607961968	0.733330523	0	0	15	3291
GO:0046527 glucosyltransferase activity	1	0.597250995	0.935	0.006	Molecular Function	GO:0046527	glucosyltransferase activity	0.597250995	0.733971103	0	0	1	180
GO:0090351 seedling development	1	0.609633093	0.909	0.005	Biological Process	GO:0090351	seedling development	0.609633093	0.734433913	0	0	1	197
GO:0008135 translation factor activity, RNA binding	1	0.601317605	0.935	0.005	Molecular Function	GO:0008135	translation factor activity, RNA binding	0.601317605	0.736012749	0	0	1	182
GO:0042440 pigment metabolic process	1	0.6170503	0.909	0.005	Biological Process	GO:0042440	pigment metabolic process	0.6170503	0.740417116	0	0	1	201
GO:0048731 system development	9	0.618372898	8.182	0.004	Biological Process	GO:0048731	system development	0.618372898	0.740417116	0	0	9	2005
GO:0009814 defense response, incompatible interaction	1	0.618882675	0.909	0.005	Biological Process	GO:0009814	defense response, incompatible interaction	0.618882675	0.740417116	0	0	1	202
GO:0018215 protein phosphopantetheinylation	1	0.618882675	0.909	0.005	Biological Process	GO:0018215	protein phosphopantetheinylation	0.618882675	0.740417116	0	0	1	202
GO:0042594 response to starvation	1	0.618882675	0.909	0.005	Biological Process	GO:0042594	response to starvation	0.618882675	0.740417116	0	0	1	202
GO:0009790 embryo development	2	0.619174767	1.818	0.005	Biological Process	GO:0009790	embryo development	0.619174767	0.740417116	0	0	2	439
GO:0046486 glycerolipid metabolic process	1	0.620706362	0.909	0.005	Biological Process	GO:0046486	glycerolipid metabolic process	0.620706362	0.741335642	0	0	1	203
GO:0040029 regulation of gene expression, epigenetic	1	0.622521401	0.909	0.005	Biological Process	GO:0040029	regulation of gene expression, epigenetic	0.622521401	0.741678871	0	0	1	204
GO:0070085 glycosylation	1	0.622521401	0.909	0.005	Biological Process	GO:0070085	glycosylation	0.622521401	0.741678871	0	0	1	204
GO:0044440 endosomal part	1	0.666002119	0.87	0.005	Cellular Component	GO:0044440	endosomal part	0.666002119	0.744741285	0	0	1	198
GO:0006629 lipid metabolic process	5	0.631763904	4.545	0.004	Biological Process	GO:0006629	lipid metabolic process	0.631763904	0.751768077	0	0	5	1137
GO:0031461 cullin-RING ubiquitin ligase complex	1	0.680548266	0.87	0.005	Cellular Component	GO:0031461	cullin-RING ubiquitin ligase complex	0.680548266	0.755546576	0	0	1	206
GO:0031985 Golgi cisterna	1	0.682321798	0.87	0.005	Cellular Component	GO:0031985	Golgi cisterna	0.682321798	0.755546576	0	0	1	207
GO:1901607 alpha-amino acid biosynthetic process	1	0.636735236	0.909	0.005	Biological Process	GO:1901607	alpha-amino acid biosynthetic process	0.636735236	0.75675632	0	0	1	212
GO:0071396 cellular response to lipid	2	0.642249612	1.818	0.004	Biological Process	GO:0071396	cellular response to lipid	0.642249612	0.762376985	0	0	2	458
GO:0000280 nuclear division	1	0.645348209	0.909	0.005	Biological Process	GO:0000280	nuclear division	0.645348209	0.765119793	0	0	1	217
GO:0032989 cellular component morphogenesis	2	0.651634847	1.818	0.004	Biological Process	GO:0032989	cellular component morphogenesis	0.651634847	0.77163102	0	0	2	466
GO:0016757 transferase activity, transferring glycosyl groups	3	0.634393106	2.804	0.005	Molecular Function	GO:0016757	transferase activity, transferring glycosyl groups	0.634393106	0.772448429	0	0	3	647
GO:0043531 ADP binding	1	0.636134001	0.935	0.005	Molecular Function	GO:0043531	ADP binding	0.636134001	0.772448429	0	0	1	200
GO:0005795 Golgi stack	1	0.701197993	0.87	0.005	Cellular Component	GO:0005795	Golgi stack	0.701197993	0.772577013	0	0	1	218
GO:0044454 nuclear chromosome part	1	0.704508554	0.87	0.005	Cellular Component	GO:0044454	nuclear chromosome part	0.704508554	0.772577013	0	0	1	220
GO:0009888 tissue development	3	0.654075582	2.727	0.004	Biological Process	GO:0009888	tissue development	0.654075582	0.77357782	0	0	3	705
GO:0009734 auxin-activated signaling pathway	1	0.657067399	0.909	0.004	Biological Process	GO:0009734	auxin-activated signaling pathway	0.657067399	0.775281638	0	0	1	224
GO:0040007 growth	3	0.657859149	2.727	0.004	Biological Process	GO:0040007	growth	0.657859149	0.775281638	0	0	3	709
GO:0006399 tRNA metabolic process	1	0.658709939	0.909	0.004	Biological Process	GO:0006399	tRNA metabolic process	0.658709939	0.775281638	0	0	1	225
GO:0019953 sexual reproduction	1	0.658709939	0.909	0.004	Biological Process	GO:0019953	sexual reproduction	0.658709939	0.775281638	0	0	1	225
GO:0006508 proteolysis	5	0.659904635	4.545	0.004	Biological Process	GO:0006508	proteolysis	0.659904635	0.775747459	0	0	5	1174
GO:0008757 S-adenosylmethionine-dependent methyltransferase activity	1	0.643452125	0.935	0.005	Molecular Function	GO:0008757	S-adenosylmethionine-dependent methyltransferase activity	0.643452125	0.776138314	0	0	1	204
GO:0015297 antiporter activity	1	0.645258755	0.935	0.005	Molecular Function	GO:0015297	antiporter activity	0.645258755	0.776138314	0	0	1	205
GO:0008233 peptidase activity	3	0.646781928	2.804	0.005	Molecular Function	GO:0008233	peptidase activity	0.646781928	0.776138314	0	0	3	659
GO:0042803 protein homodimerization activity	1	0.650624413	0.935	0.005	Molecular Function	GO:0042803	protein homodimerization activity	0.650624413	0.777699494	0	0	1	208
GO:0006397 mRNA processing	2	0.664222472	1.818	0.004	Biological Process	GO:0006397	mRNA processing	0.664222472	0.779879106	0	0	2	477
GO:0016458 gene silencing	1	0.665202507	0.909	0.004	Biological Process	GO:0016458	gene silencing	0.665202507	0.780086514	0	0	1	229
GO:0003924 GTPase activity	1	0.65590966	0.935	0.005	Molecular Function	GO:0003924	GTPase activity	0.65590966	0.780966366	0	0	1	211
GO:0006796 phosphate-containing compound metabolic process	11	0.667151084	10	0.004	Biological Process	GO:0006796	phosphate-containing compound metabolic process	0.667151084	0.781427868	0	0	11	2533
GO:0009639 response to red or far red light	1	0.668402742	0.909	0.004	Biological Process	GO:0009639	response to red or far red light	0.668402742	0.781950678	0	0	1	231
GO:0000228 nuclear chromosome	1	0.718961754	0.87	0.004	Cellular Component	GO:0000228	nuclear chromosome	0.718961754	0.784636145	0	0	1	229
GO:0090501 RNA phosphodiester bond hydrolysis	1	0.671572663	0.909	0.004	Biological Process	GO:0090501	RNA phosphodiester bond hydrolysis	0.671572663	0.784713666	0	0	1	233
GO:0008270 zinc ion binding	3	0.661853377	2.804	0.004	Molecular Function	GO:0008270	zinc ion binding	0.661853377	0.784988889	0	0	3	674
GO:0044703 multi-organism reproductive process	1	0.673146345	0.909	0.004	Biological Process	GO:0044703	multi-organism reproductive process	0.673146345	0.785607092	0	0	1	234
GO:0008652 cellular amino acid biosynthetic process	1	0.676271327	0.909	0.004	Biological Process	GO:0008652	cellular amino acid biosynthetic process	0.676271327	0.788306672	0	0	1	236
GO:0046907 intracellular transport	3	0.680841178	2.727	0.004	Biological Process	GO:0046907	intracellular transport	0.680841178	0.789679145	0	0	3	734
GO:0071456 cellular response to hypoxia	1	0.680903371	0.909	0.004	Biological Process	GO:0071456	cellular response to hypoxia	0.680903371	0.789679145	0	0	1	239
GO:0006511 ubiquitin-dependent protein catabolic process	2	0.682961589	1.818	0.004	Biological Process	GO:0006511	ubiquitin-dependent protein catabolic process	0.682961589	0.789679145	0	0	2	494
GO:0006520 cellular amino acid metabolic process	2	0.682961589	1.818	0.004	Biological Process	GO:0006520	cellular amino acid metabolic process	0.682961589	0.789679145	0	0	2	494
GO:0009108 coenzyme biosynthetic process	1	0.683954852	0.909	0.004	Biological Process	GO:0009108	coenzyme biosynthetic process	0.683954852	0.789679145	0	0	1	241
GO:0036294 cellular response to decreased oxygen levels	1	0.683954852	0.909	0.004	Biological Process	GO:0036294	cellular response to decreased oxygen levels	0.683954852	0.789679145	0	0	1	241
GO:0071365 cellular response to auxin stimulus	1	0.683954852	0.909	0.004	Biological Process	GO:0071365	cellular response to auxin stimulus	0.683954852	0.789679145	0	0	1	241
GO:0071453 cellular response to oxygen levels	1	0.683954852	0.909	0.004	Biological Process	GO:0071453	cellular response to oxygen levels	0.683954852	0.789679145	0	0	1	241
GO:0000398 mRNA splicing, via spliceosome	1	0.685469731	0.909	0.004	Biological Process	GO:0000398	mRNA splicing, via spliceosome	0.685469731	0.790488253	0	0	1	242
GO:0007017 microtubule-based process	1	0.686977415	0.909	0.004	Biological Process	GO:0007017	microtubule-based process	0.686977415	0.791287153	0	0	1	243
GO:0006605 protein targeting	1	0.689971332	0.909	0.004	Biological Process	GO:0006605	protein targeting	0.689971332	0.793794032	0	0	1	245
GO:0042493 response to drug	2	0.694630882	1.818	0.004	Biological Process	GO:0042493	response to drug	0.694630882	0.798208978	0	0	2	505
GO:0019941 modification-dependent protein catabolic process	2	0.697751995	1.818	0.004	Biological Process	GO:0019941	modification-dependent protein catabolic process	0.697751995	0.800847739	0	0	2	508
GO:0005874 microtubule	1	0.738609747	0.87	0.004	Cellular Component	GO:0005874	microtubule	0.738609747	0.80222207	0	0	1	242
GO:0031667 response to nutrient levels	1	0.70022831	0.909	0.004	Biological Process	GO:0031667	response to nutrient levels	0.70022831	0.802294291	0	0	1	252
GO:0022414 reproductive process	8	0.700664839	7.273	0.004	Biological Process	GO:0022414	reproductive process	0.700664839	0.802294291	0	0	8	1922
GO:0004386 helicase activity	1	0.681170898	0.935	0.004	Molecular Function	GO:0004386	helicase activity	0.681170898	0.804781061	0	0	1	226
GO:0099081 supramolecular polymer	1	0.752791416	0.87	0.004	Cellular Component	GO:0099081	supramolecular polymer	0.752791416	0.80605496	0	0	1	252
GO:0099512 supramolecular fiber	1	0.752791416	0.87	0.004	Cellular Component	GO:0099512	supramolecular fiber	0.752791416	0.80605496	0	0	1	252
GO:0099513 polymeric cytoskeletal fiber	1	0.752791416	0.87	0.004	Cellular Component	GO:0099513	polymeric cytoskeletal fiber	0.752791416	0.80605496	0	0	1	252
GO:0099080 supramolecular complex	1	0.756895218	0.87	0.004	Cellular Component	GO:0099080	supramolecular complex	0.756895218	0.806644199	0	0	1	255
GO:0000003 reproduction	8	0.70566922	7.273	0.004	Biological Process	GO:0000003	reproduction	0.70566922	0.807072806	0	0	8	1931
GO:0034655 nucleobase-containing compound catabolic process	1	0.707348145	0.909	0.004	Biological Process	GO:0034655	nucleobase-containing compound catabolic process	0.707348145	0.808041233	0	0	1	257
GO:0008509 anion transmembrane transporter activity	1	0.687591077	0.935	0.004	Molecular Function	GO:0008509	anion transmembrane transporter activity	0.687591077	0.809241806	0	0	1	230
GO:0043632 modification-dependent macromolecule catabolic process	2	0.710976259	1.818	0.004	Biological Process	GO:0043632	modification-dependent macromolecule catabolic process	0.710976259	0.811231431	0	0	2	521
GO:0009738 abscisic acid-activated signaling pathway	1	0.714300379	0.909	0.004	Biological Process	GO:0009738	abscisic acid-activated signaling pathway	0.714300379	0.813113327	0	0	1	262
GO:0010243 response to organonitrogen compound	1	0.714300379	0.909	0.004	Biological Process	GO:0010243	response to organonitrogen compound	0.714300379	0.813113327	0	0	1	262
GO:0042737 drug catabolic process	1	0.715671059	0.909	0.004	Biological Process	GO:0042737	drug catabolic process	0.715671059	0.81371967	0	0	1	263
GO:0001666 response to hypoxia	1	0.718392901	0.909	0.004	Biological Process	GO:0001666	response to hypoxia	0.718392901	0.815859072	0	0	1	265
GO:0046677 response to antibiotic	1	0.719744123	0.909	0.004	Biological Process	GO:0046677	response to antibiotic	0.719744123	0.816225716	0	0	1	266
GO:0051649 establishment of localization in cell	3	0.721759604	2.727	0.004	Biological Process	GO:0051649	establishment of localization in cell	0.721759604	0.816225716	0	0	3	782
GO:0000375 RNA splicing, via transesterification reactions	1	0.723759363	0.909	0.004	Biological Process	GO:0000375	RNA splicing, via transesterification reactions	0.723759363	0.816225716	0	0	1	269
GO:0000377 RNA splicing, via transesterification reactions with bulged adenosine as nucleophile	1	0.723759363	0.909	0.004	Biological Process	GO:0000377	RNA splicing, via transesterification reactions with bulged adenosine as nucleophile	0.723759363	0.816225716	0	0	1	269
GO:0016042 lipid catabolic process	1	0.723759363	0.909	0.004	Biological Process	GO:0016042	lipid catabolic process	0.723759363	0.816225716	0	0	1	269
GO:0036293 response to decreased oxygen levels	1	0.723759363	0.909	0.004	Biological Process	GO:0036293	response to decreased oxygen levels	0.723759363	0.816225716	0	0	1	269
GO:0070482 response to oxygen levels	1	0.725085068	0.909	0.004	Biological Process	GO:0070482	response to oxygen levels	0.725085068	0.816446863	0	0	1	270
GO:0071555 cell wall organization	2	0.725637119	1.818	0.004	Biological Process	GO:0071555	cell wall organization	0.725637119	0.816446863	0	0	2	536
GO:0032502 developmental process	14	0.727991157	12.727	0.004	Biological Process	GO:0032502	developmental process	0.727991157	0.818147469	0	0	14	3331
GO:0072594 establishment of protein localization to organelle	1	0.732907932	0.909	0.004	Biological Process	GO:0072594	establishment of protein localization to organelle	0.732907932	0.822720927	0	0	1	276
GO:0051172 negative regulation of nitrogen compound metabolic process	2	0.73691407	1.818	0.004	Biological Process	GO:0051172	negative regulation of nitrogen compound metabolic process	0.73691407	0.826262773	0	0	2	548
GO:0048827 phyllome development	2	0.738755147	1.818	0.004	Biological Process	GO:0048827	phyllome development	0.738755147	0.826981212	0	0	2	550
GO:0031347 regulation of defense response	1	0.739258179	0.909	0.004	Biological Process	GO:0031347	regulation of defense response	0.739258179	0.826981212	0	0	1	281
GO:0050793 regulation of developmental process	3	0.743707466	2.727	0.004	Biological Process	GO:0050793	regulation of developmental process	0.743707466	0.831001092	0	0	3	810
GO:0032555 purine ribonucleotide binding	13	0.708954939	12.15	0.004	Molecular Function	GO:0032555	purine ribonucleotide binding	0.708954939	0.83118855	0	0	13	2895
GO:0000151 ubiquitin ligase complex	1	0.784995534	0.87	0.004	Cellular Component	GO:0000151	ubiquitin ligase complex	0.784995534	0.832682179	0	0	1	277
GO:1903047 mitotic cell cycle process	1	0.74668126	0.909	0.003	Biological Process	GO:1903047	mitotic cell cycle process	0.74668126	0.833364946	0	0	1	287
GO:0017076 purine nucleotide binding	13	0.714671043	12.15	0.004	Molecular Function	GO:0017076	purine nucleotide binding	0.714671043	0.833923114	0	0	13	2907
GO:0061630 ubiquitin protein ligase activity	1	0.717820418	0.935	0.004	Molecular Function	GO:0061630	ubiquitin protein ligase activity	0.717820418	0.833923114	0	0	1	250
GO:0061659 ubiquitin-like protein ligase activity	1	0.72209761	0.935	0.004	Molecular Function	GO:0061659	ubiquitin-like protein ligase activity	0.72209761	0.833923114	0	0	1	253
GO:0032553 ribonucleotide binding	13	0.722188317	12.15	0.004	Molecular Function	GO:0032553	ribonucleotide binding	0.722188317	0.833923114	0	0	13	2923
GO:0050832 defense response to fungus	2	0.749574624	1.818	0.004	Biological Process	GO:0050832	defense response to fungus	0.749574624	0.835633708	0	0	2	562
GO:0019899 enzyme binding	2	0.729186269	1.869	0.004	Molecular Function	GO:0019899	enzyme binding	0.729186269	0.838838339	0	0	2	510
GO:0044433 cytoplasmic vesicle part	1	0.795540321	0.87	0.003	Cellular Component	GO:0044433	cytoplasmic vesicle part	0.795540321	0.839942571	0	0	1	286
GO:0043161 proteasome-mediated ubiquitin-dependent protein catabolic process	1	0.75859049	0.909	0.003	Biological Process	GO:0043161	proteasome-mediated ubiquitin-dependent protein catabolic process	0.75859049	0.844714869	0	0	1	297
GO:0045229 external encapsulating structure organization	2	0.762561454	1.818	0.003	Biological Process	GO:0045229	external encapsulating structure organization	0.762561454	0.848164	0	0	2	577
GO:0097367 carbohydrate derivative binding	13	0.740452494	12.15	0.004	Molecular Function	GO:0097367	carbohydrate derivative binding	0.740452494	0.848608477	0	0	13	2963
GO:0048856 anatomical structure development	13	0.767243272	11.818	0.004	Biological Process	GO:0048856	anatomical structure development	0.767243272	0.851755442	0	0	13	3202
GO:0048364 root development	2	0.767592466	1.818	0.003	Biological Process	GO:0048364	root development	0.767592466	0.851755442	0	0	2	583
GO:0022622 root system development	2	0.768422005	1.818	0.003	Biological Process	GO:0022622	root system development	0.768422005	0.851755442	0	0	2	584
GO:0031324 negative regulation of cellular metabolic process	2	0.774157753	1.818	0.003	Biological Process	GO:0031324	negative regulation of cellular metabolic process	0.774157753	0.855382221	0	0	2	591
GO:0044270 cellular nitrogen compound catabolic process	1	0.774336737	0.909	0.003	Biological Process	GO:0044270	cellular nitrogen compound catabolic process	0.774336737	0.855382221	0	0	1	311
GO:0046700 heterocycle catabolic process	1	0.774336737	0.909	0.003	Biological Process	GO:0046700	heterocycle catabolic process	0.774336737	0.855382221	0	0	1	311
GO:0016787 hydrolase activity	17	0.751323215	15.888	0.004	Molecular Function	GO:0016787	hydrolase activity	0.751323215	0.857854119	0	0	17	3835
GO:0009791 post-embryonic development	6	0.778129852	5.455	0.004	Biological Process	GO:0009791	post-embryonic development	0.778129852	0.858595553	0	0	6	1599
GO:0016779 nucleotidyltransferase activity	1	0.756575688	0.935	0.004	Molecular Function	GO:0016779	nucleotidyltransferase activity	0.756575688	0.859680484	0	0	1	279
GO:0035639 purine ribonucleoside triphosphate binding	12	0.758541603	11.215	0.004	Molecular Function	GO:0035639	purine ribonucleoside triphosphate binding	0.758541603	0.859680484	0	0	12	2790
GO:0099402 plant organ development	4	0.783843129	3.636	0.004	Biological Process	GO:0099402	plant organ development	0.783843129	0.863521474	0	0	4	1120
GO:0016071 mRNA metabolic process	2	0.785262061	1.818	0.003	Biological Process	GO:0016071	mRNA metabolic process	0.785262061	0.863521474	0	0	2	605
GO:0032268 regulation of cellular protein metabolic process	2	0.785262061	1.818	0.003	Biological Process	GO:0032268	regulation of cellular protein metabolic process	0.785262061	0.863521474	0	0	2	605
GO:0010498 proteasomal protein catabolic process	1	0.787020485	0.909	0.003	Biological Process	GO:0010498	proteasomal protein catabolic process	0.787020485	0.864476121	0	0	1	323
GO:0033365 protein localization to organelle	1	0.790079423	0.909	0.003	Biological Process	GO:0033365	protein localization to organelle	0.790079423	0.865508316	0	0	1	326
GO:0006139 nucleobase-containing compound metabolic process	21	0.790512918	19.091	0.004	Biological Process	GO:0006139	nucleobase-containing compound metabolic process	0.790512918	0.865508316	0	0	21	5065
GO:0010629 negative regulation of gene expression	2	0.79063427	1.818	0.003	Biological Process	GO:0010629	negative regulation of gene expression	0.79063427	0.865508316	0	0	2	612
GO:0048316 seed development	2	0.795145422	1.818	0.003	Biological Process	GO:0048316	seed development	0.795145422	0.869466447	0	0	2	618
GO:0051246 regulation of protein metabolic process	2	0.801752824	1.818	0.003	Biological Process	GO:0051246	regulation of protein metabolic process	0.801752824	0.875705278	0	0	2	627
GO:0032559 adenyl ribonucleotide binding	11	0.776026658	10.28	0.004	Molecular Function	GO:0032559	adenyl ribonucleotide binding	0.776026658	0.876251503	0	0	11	2614
GO:0009966 regulation of signal transduction	1	0.803788596	0.909	0.003	Biological Process	GO:0009966	regulation of signal transduction	0.803788596	0.87694239	0	0	1	340
GO:0030554 adenyl nucleotide binding	11	0.780747948	10.28	0.004	Molecular Function	GO:0030554	adenyl nucleotide binding	0.780747948	0.878341441	0	0	11	2625
GO:0009555 pollen development	1	0.808466562	0.909	0.003	Biological Process	GO:0009555	pollen development	0.808466562	0.881056152	0	0	1	345
GO:0023051 regulation of signaling	1	0.809388806	0.909	0.003	Biological Process	GO:0023051	regulation of signaling	0.809388806	0.881072344	0	0	1	346
GO:0010646 regulation of cell communication	1	0.81212922	0.909	0.003	Biological Process	GO:0010646	regulation of cell communication	0.81212922	0.883065479	0	0	1	349
GO:0009620 response to fungus	2	0.817795036	1.818	0.003	Biological Process	GO:0009620	response to fungus	0.817795036	0.885803177	0	0	2	650
GO:1901605 alpha-amino acid metabolic process	1	0.818372627	0.909	0.003	Biological Process	GO:1901605	alpha-amino acid metabolic process	0.818372627	0.885803177	0	0	1	356
GO:0046483 heterocycle metabolic process	22	0.819152976	20	0.004	Biological Process	GO:0046483	heterocycle metabolic process	0.819152976	0.885803177	0	0	22	5385
GO:0008380 RNA splicing	1	0.819247594	0.909	0.003	Biological Process	GO:0008380	RNA splicing	0.819247594	0.885803177	0	0	1	357
GO:0010154 fruit development	2	0.819800588	1.818	0.003	Biological Process	GO:0010154	fruit development	0.819800588	0.885803177	0	0	2	653
GO:0071310 cellular response to organic substance	4	0.820120552	3.636	0.003	Biological Process	GO:0071310	cellular response to organic substance	0.820120552	0.885803177	0	0	4	1186
GO:0015291 secondary active transmembrane transporter activity	1	0.797422326	0.935	0.003	Molecular Function	GO:0015291	secondary active transmembrane transporter activity	0.797422326	0.891918557	0	0	1	315
GO:0003824 catalytic activity	47	0.803401171	43.925	0.005	Molecular Function	GO:0003824	catalytic activity	0.803401171	0.891918557	0	0	47	10143
GO:0008092 cytoskeletal protein binding	1	0.803536055	0.935	0.003	Molecular Function	GO:0008092	cytoskeletal protein binding	0.803536055	0.891918557	0	0	1	321
GO:0140098 catalytic activity, acting on RNA	2	0.804475561	1.869	0.003	Molecular Function	GO:0140098	catalytic activity, acting on RNA	0.804475561	0.891918557	0	0	2	596
GO:0004497 monooxygenase activity	1	0.808490929	0.935	0.003	Molecular Function	GO:0004497	monooxygenase activity	0.808490929	0.893134384	0	0	1	326
GO:0044419 interspecies interaction between organisms	1	0.834301551	0.909	0.003	Biological Process	GO:0044419	interspecies interaction between organisms	0.834301551	0.900118673	0	0	1	375
GO:2000241 regulation of reproductive process	1	0.838258045	0.909	0.003	Biological Process	GO:2000241	regulation of reproductive process	0.838258045	0.902615335	0	0	1	380
GO:0048367 shoot system development	3	0.839388277	2.727	0.003	Biological Process	GO:0048367	shoot system development	0.839388277	0.902615335	0	0	3	961
GO:0050790 regulation of catalytic activity	2	0.839404374	1.818	0.003	Biological Process	GO:0050790	regulation of catalytic activity	0.839404374	0.902615335	0	0	2	684
GO:0005524 ATP binding	10	0.822754519	9.346	0.004	Molecular Function	GO:0005524	ATP binding	0.822754519	0.904437493	0	0	10	2509
GO:0004674 protein serine/threonine kinase activity	3	0.824634184	2.804	0.003	Molecular Function	GO:0004674	protein serine/threonine kinase activity	0.824634184	0.904437493	0	0	3	882
GO:0048580 regulation of post-embryonic development	1	0.848845078	0.909	0.003	Biological Process	GO:0048580	regulation of post-embryonic development	0.848845078	0.911757268	0	0	1	394
GO:0005506 iron ion binding	1	0.834881892	0.935	0.003	Molecular Function	GO:0005506	iron ion binding	0.834881892	0.912406639	0	0	1	355
GO:0006281 DNA repair	1	0.851022783	0.909	0.003	Biological Process	GO:0006281	DNA repair	0.851022783	0.912995571	0	0	1	397
GO:0048869 cellular developmental process	3	0.851878463	2.727	0.003	Biological Process	GO:0048869	cellular developmental process	0.851878463	0.912995571	0	0	3	986
GO:0090305 nucleic acid phosphodiester bond hydrolysis	1	0.8580597	0.909	0.002	Biological Process	GO:0090305	nucleic acid phosphodiester bond hydrolysis	0.8580597	0.91860636	0	0	1	407
GO:0065009 regulation of molecular function	2	0.862912628	1.818	0.003	Biological Process	GO:0065009	regulation of molecular function	0.862912628	0.921844843	0	0	2	726
GO:0007154 cell communication	8	0.862983484	7.273	0.003	Biological Process	GO:0007154	cell communication	0.862983484	0.921844843	0	0	8	2294
GO:0098772 molecular function regulator	2	0.851525099	1.869	0.003	Molecular Function	GO:0098772	molecular function regulator	0.851525099	0.92728356	0	0	2	666
GO:0006974 cellular response to DNA damage stimulus	1	0.874851495	0.909	0.002	Biological Process	GO:0006974	cellular response to DNA damage stimulus	0.874851495	0.932517829	0	0	1	433
GO:0032870 cellular response to hormone stimulus	3	0.875617195	2.727	0.003	Biological Process	GO:0032870	cellular response to hormone stimulus	0.875617195	0.932517829	0	0	3	1039
GO:0007275 multicellular organism development	10	0.875856086	9.091	0.004	Biological Process	GO:0007275	multicellular organism development	0.875856086	0.932517829	0	0	10	2825
GO:0008168 methyltransferase activity	1	0.86546731	0.935	0.003	Molecular Function	GO:0008168	methyltransferase activity	0.86546731	0.93654945	0	0	1	395
GO:0020037 heme binding	1	0.866155211	0.935	0.003	Molecular Function	GO:0020037	heme binding	0.866155211	0.93654945	0	0	1	396
GO:0016705 oxidoreductase activity, acting on paired donors, with incorporation or reduction of molecular oxygen	1	0.869542789	0.935	0.002	Molecular Function	GO:0016705	oxidoreductase activity, acting on paired donors, with incorporation or reduction of molecular oxygen	0.869542789	0.936901737	0	0	1	401
GO:0010605 negative regulation of macromolecule metabolic process	2	0.883259148	1.818	0.003	Biological Process	GO:0010605	negative regulation of macromolecule metabolic process	0.883259148	0.939369806	0	0	2	768
GO:0016741 transferase activity, transferring one-carbon groups	1	0.876699379	0.935	0.002	Molecular Function	GO:0016741	transferase activity, transferring one-carbon groups	0.876699379	0.941298281	0	0	1	412
GO:0008144 drug binding	10	0.880304656	9.346	0.004	Molecular Function	GO:0008144	drug binding	0.880304656	0.941864423	0	0	10	2684
GO:0048229 gametophyte development	1	0.888055536	0.909	0.002	Biological Process	GO:0048229	gametophyte development	0.888055536	0.943437555	0	0	1	456
GO:0044451 nucleoplasm part	1	0.901355272	0.87	0.002	Cellular Component	GO:0044451	nucleoplasm part	0.901355272	0.943580245	0	0	1	416
GO:0044425 membrane part	35	0.902012834	30.435	0.005	Cellular Component	GO:0044425	membrane part	0.902012834	0.943580245	0	0	35	7475
GO:0071495 cellular response to endogenous stimulus	3	0.889780673	2.727	0.003	Biological Process	GO:0071495	cellular response to endogenous stimulus	0.889780673	0.944237195	0	0	3	1075
GO:0098791 Golgi subcompartment	2	0.913385134	1.739	0.003	Cellular Component	GO:0098791	Golgi subcompartment	0.913385134	0.951093694	0	0	2	729
GO:0044431 Golgi apparatus part	2	0.920601925	1.739	0.003	Cellular Component	GO:0044431	Golgi apparatus part	0.920601925	0.954231219	0	0	2	748
GO:0016021 integral component of membrane	31	0.926650152	26.957	0.005	Cellular Component	GO:0016021	integral component of membrane	0.926650152	0.956134475	0	0	31	6861
GO:0032259 methylation	1	0.902279315	0.909	0.002	Biological Process	GO:0032259	methylation	0.902279315	0.956455474	0	0	1	484
GO:0009892 negative regulation of metabolic process	2	0.905723994	1.818	0.002	Biological Process	GO:0009892	negative regulation of metabolic process	0.905723994	0.957585802	0	0	2	823
GO:0048518 positive regulation of biological process	4	0.906863483	3.636	0.003	Biological Process	GO:0048518	positive regulation of biological process	0.906863483	0.957585802	0	0	4	1406
GO:0006464 cellular protein modification process	11	0.907443846	10	0.003	Biological Process	GO:0006464	cellular protein modification process	0.907443846	0.957585802	0	0	11	3200
GO:0036211 protein modification process	11	0.907443846	10	0.003	Biological Process	GO:0036211	protein modification process	0.907443846	0.957585802	0	0	11	3200
GO:0007165 signal transduction	6	0.908276543	5.455	0.003	Biological Process	GO:0007165	signal transduction	0.908276543	0.957585802	0	0	6	1947
GO:0000139 Golgi membrane	1	0.942258852	0.87	0.002	Cellular Component	GO:0000139	Golgi membrane	0.942258852	0.962339621	0	0	1	511
GO:0005634 nucleus	27	0.945278266	23.478	0.004	Cellular Component	GO:0005634	nucleus	0.945278266	0.962339621	0	0	27	6223
GO:0005654 nucleoplasm	1	0.949870027	0.87	0.002	Cellular Component	GO:0005654	nucleoplasm	0.949870027	0.962339621	0	0	1	536
GO:0031224 intrinsic component of membrane	31	0.950721397	26.957	0.004	Cellular Component	GO:0031224	intrinsic component of membrane	0.950721397	0.962339621	0	0	31	7048
GO:1902494 catalytic complex	3	0.953860857	2.609	0.003	Cellular Component	GO:1902494	catalytic complex	0.953860857	0.962339621	0	0	3	1141
GO:0048523 negative regulation of cellular process	2	0.913875267	1.818	0.002	Biological Process	GO:0048523	negative regulation of cellular process	0.913875267	0.962443475	0	0	2	846
GO:0023052 signaling	6	0.918596715	5.455	0.003	Biological Process	GO:0023052	signaling	0.918596715	0.966367725	0	0	6	1990
GO:0032446 protein modification by small protein conjugation	2	0.920426405	1.818	0.002	Biological Process	GO:0032446	protein modification by small protein conjugation	0.920426405	0.967244632	0	0	2	866
GO:0009908 flower development	1	0.927007648	0.909	0.002	Biological Process	GO:0009908	flower development	0.927007648	0.973107487	0	0	1	544
GO:0004842 ubiquitin-protein transferase activity	1	0.916139918	0.935	0.002	Molecular Function	GO:0004842	ubiquitin-protein transferase activity	0.916139918	0.976553445	0	0	1	487
GO:0019787 ubiquitin-like protein transferase activity	1	0.919109125	0.935	0.002	Molecular Function	GO:0019787	ubiquitin-like protein transferase activity	0.919109125	0.976553445	0	0	1	494
GO:0090567 reproductive shoot system development	1	0.931485994	0.909	0.002	Biological Process	GO:0090567	reproductive shoot system development	0.931485994	0.976752592	0	0	1	557
GO:1990234 transferase complex	1	0.97575604	0.87	0.002	Cellular Component	GO:1990234	transferase complex	0.97575604	0.980073545	0	0	1	664
GO:2000026 regulation of multicellular organismal development	1	0.936315871	0.909	0.002	Biological Process	GO:2000026	regulation of multicellular organismal development	0.936315871	0.980758048	0	0	1	572
GO:0004672 protein kinase activity	3	0.929412673	2.804	0.003	Molecular Function	GO:0004672	protein kinase activity	0.929412673	0.98183237	0	0	3	1137
GO:0016740 transferase activity	16	0.930494729	14.953	0.004	Molecular Function	GO:0016740	transferase activity	0.930494729	0.98183237	0	0	16	4281
GO:0030234 enzyme regulator activity	1	0.935194386	0.935	0.002	Molecular Function	GO:0030234	enzyme regulator activity	0.935194386	0.983375603	0	0	1	537
GO:0016788 hydrolase activity, acting on ester bonds	3	0.938384562	2.804	0.003	Molecular Function	GO:0016788	hydrolase activity, acting on ester bonds	0.938384562	0.983375603	0	0	3	1173
GO:0009755 hormone-mediated signaling pathway	2	0.941786574	1.818	0.002	Biological Process	GO:0009755	hormone-mediated signaling pathway	0.941786574	0.985425391	0	0	2	944
GO:0070647 protein modification by small protein conjugation or removal	2	0.945220786	1.818	0.002	Biological Process	GO:0070647	protein modification by small protein conjugation or removal	0.945220786	0.986372839	0	0	2	959
GO:0006468 protein phosphorylation	3	0.945732214	2.727	0.002	Biological Process	GO:0006468	protein phosphorylation	0.945732214	0.986372839	0	0	3	1277
GO:0032501 multicellular organismal process	10	0.94573956	9.091	0.003	Biological Process	GO:0032501	multicellular organismal process	0.94573956	0.986372839	0	0	10	3175
GO:0051239 regulation of multicellular organismal process	1	0.952252562	0.909	0.002	Biological Process	GO:0051239	regulation of multicellular organismal process	0.952252562	0.99210004	0	0	1	631
GO:0035556 intracellular signal transduction	1	0.954973342	0.909	0.002	Biological Process	GO:0035556	intracellular signal transduction	0.954973342	0.99386829	0	0	1	643
GO:0009653 anatomical structure morphogenesis	2	0.956783627	1.818	0.002	Biological Process	GO:0009653	anatomical structure morphogenesis	0.956783627	0.99468619	0	0	2	1017
GO:0009891 positive regulation of biosynthetic process	1	0.960352519	0.909	0.001	Biological Process	GO:0009891	positive regulation of biosynthetic process	0.960352519	0.997328658	0	0	1	669
GO:0043412 macromolecule modification	11	0.962401	10	0.003	Biological Process	GO:0043412	macromolecule modification	0.962401	0.998388217	0	0	11	3572
GO:0016773 phosphotransferase activity, alcohol group as acceptor	3	0.962482507	2.804	0.002	Molecular Function	GO:0016773	phosphotransferase activity, alcohol group as acceptor	0.962482507	1	0	0	3	1301
GO:0016310 phosphorylation	4	0.970412646	3.636	0.002	Biological Process	GO:0016310	phosphorylation	0.970412646	1	0	0	4	1750
GO:0065007 biological regulation	24	0.970743676	21.818	0.004	Biological Process	GO:0065007	biological regulation	0.970743676	1	0	0	24	6813
GO:0048522 positive regulation of cellular process	2	0.972539681	1.818	0.002	Biological Process	GO:0048522	positive regulation of cellular process	0.972539681	1	0	0	2	1126
GO:0006259 DNA metabolic process	1	0.975124004	0.909	0.001	Biological Process	GO:0006259	DNA metabolic process	0.975124004	1	0	0	1	764
GO:0016567 protein ubiquitination	1	0.982290391	0.909	0.001	Biological Process	GO:0016567	protein ubiquitination	0.982290391	1	0	0	1	833
GO:0018130 heterocycle biosynthetic process	9	0.983139304	8.182	0.003	Biological Process	GO:0018130	heterocycle biosynthetic process	0.983139304	1	0	0	9	3338
GO:0016772 transferase activity, transferring phosphorus-containing groups	4	0.983984993	3.738	0.002	Molecular Function	GO:0016772	transferase activity, transferring phosphorus-containing groups	0.983984993	1	0	0	4	1814
GO:0048519 negative regulation of biological process	2	0.983998649	1.818	0.002	Biological Process	GO:0048519	negative regulation of biological process	0.983998649	1	0	0	2	1253
GO:0016301 kinase activity	3	0.98419981	2.804	0.002	Molecular Function	GO:0016301	kinase activity	0.98419981	1	0	0	3	1514
GO:0034654 nucleobase-containing compound biosynthetic process	8	0.9853208	7.273	0.003	Biological Process	GO:0034654	nucleobase-containing compound biosynthetic process	0.9853208	1	0	0	8	3111
GO:0031325 positive regulation of cellular metabolic process	1	0.985888469	0.909	0.001	Biological Process	GO:0031325	positive regulation of cellular metabolic process	0.985888469	1	0	0	1	879
GO:0019438 aromatic compound biosynthetic process	9	0.986420726	8.182	0.003	Biological Process	GO:0019438	aromatic compound biosynthetic process	0.986420726	1	0	0	9	3410
GO:0016070 RNA metabolic process	11	0.987191845	10	0.003	Biological Process	GO:0016070	RNA metabolic process	0.987191845	1	0	0	11	3964
GO:0140096 catalytic activity, acting on a protein	7	0.988670296	6.542	0.003	Molecular Function	GO:0140096	catalytic activity, acting on a protein	0.988670296	1	0	0	7	2749
GO:0009893 positive regulation of metabolic process	1	0.989409476	0.909	0.001	Biological Process	GO:0009893	positive regulation of metabolic process	0.989409476	1	0	0	1	937
GO:1901362 organic cyclic compound biosynthetic process	9	0.990707591	8.182	0.003	Biological Process	GO:1901362	organic cyclic compound biosynthetic process	0.990707591	1	0	0	9	3533
GO:0000976 transcription regulatory region sequence-specific DNA binding	1	0.994516272	0.935	0.001	Molecular Function	GO:0000976	transcription regulatory region sequence-specific DNA binding	0.994516272	1	0	0	1	1010
GO:0001067 regulatory region nucleic acid binding	1	0.994516272	0.935	0.001	Molecular Function	GO:0001067	regulatory region nucleic acid binding	0.994516272	1	0	0	1	1010
GO:0044212 transcription regulatory region DNA binding	1	0.994516272	0.935	0.001	Molecular Function	GO:0044212	transcription regulatory region DNA binding	0.994516272	1	0	0	1	1010
GO:0009889 regulation of biosynthetic process	6	0.994613096	5.455	0.002	Biological Process	GO:0009889	regulation of biosynthetic process	0.994613096	1	0	0	6	2836
GO:0090304 nucleic acid metabolic process	12	0.995197346	10.909	0.003	Biological Process	GO:0090304	nucleic acid metabolic process	0.995197346	1	0	0	12	4556
GO:1990837 sequence-specific double-stranded DNA binding	1	0.995943608	0.935	0.001	Molecular Function	GO:1990837	sequence-specific double-stranded DNA binding	0.995943608	1	0	0	1	1067
GO:0003677 DNA binding	5	0.997603732	4.673	0.002	Molecular Function	GO:0003677	DNA binding	0.997603732	1	0	0	5	2589
GO:0003690 double-stranded DNA binding	1	0.99775045	0.935	0.001	Molecular Function	GO:0003690	double-stranded DNA binding	0.99775045	1	0	0	1	1178
GO:0031326 regulation of cellular biosynthetic process	5	0.998155127	4.545	0.002	Biological Process	GO:0031326	regulation of cellular biosynthetic process	0.998155127	1	0	0	5	2810
GO:0043565 sequence-specific DNA binding	1	0.999012561	0.935	0.001	Molecular Function	GO:0043565	sequence-specific DNA binding	0.999012561	1	0	0	1	1332
GO:0010468 regulation of gene expression	5	0.999190703	4.545	0.002	Biological Process	GO:0010468	regulation of gene expression	0.999190703	1	0	0	5	3017
GO:0050789 regulation of biological process	15	0.999283906	13.636	0.003	Biological Process	GO:0050789	regulation of biological process	0.999283906	1	0	0	15	5941
GO:2000112 regulation of cellular macromolecule biosynthetic process	4	0.999314414	3.636	0.001	Biological Process	GO:2000112	regulation of cellular macromolecule biosynthetic process	0.999314414	1	0	0	4	2716
GO:0010556 regulation of macromolecule biosynthetic process	4	0.999340017	3.636	0.001	Biological Process	GO:0010556	regulation of macromolecule biosynthetic process	0.999340017	1	0	0	4	2725
GO:0031323 regulation of cellular metabolic process	6	0.999401332	5.455	0.002	Biological Process	GO:0031323	regulation of cellular metabolic process	0.999401332	1	0	0	6	3418
GO:0019222 regulation of metabolic process	7	0.999427155	6.364	0.002	Biological Process	GO:0019222	regulation of metabolic process	0.999427155	1	0	0	7	3744
GO:0050794 regulation of cellular process	12	0.999464509	10.909	0.002	Biological Process	GO:0050794	regulation of cellular process	0.999464509	1	0	0	12	5217
GO:0080090 regulation of primary metabolic process	5	0.99975089	4.545	0.002	Biological Process	GO:0080090	regulation of primary metabolic process	0.99975089	1	0	0	5	3302
GO:0003700 DNA-binding transcription factor activity	1	0.999841548	0.935	0.001	Molecular Function	GO:0003700	DNA-binding transcription factor activity	0.999841548	1	0	0	1	1670
GO:0060255 regulation of macromolecule metabolic process	5	0.999889879	4.545	0.001	Biological Process	GO:0060255	regulation of macromolecule metabolic process	0.999889879	1	0	0	5	3493
GO:0051171 regulation of nitrogen compound metabolic process	4	0.999925869	3.636	0.001	Biological Process	GO:0051171	regulation of nitrogen compound metabolic process	0.999925869	1	0	0	4	3225
GO:0006355 regulation of transcription, DNA-templated	2	0.999937731	1.818	0.001	Biological Process	GO:0006355	regulation of transcription, DNA-templated	0.999937731	1	0	0	2	2453
GO:1903506 regulation of nucleic acid-templated transcription	2	0.999937731	1.818	0.001	Biological Process	GO:1903506	regulation of nucleic acid-templated transcription	0.999937731	1	0	0	2	2453
GO:2001141 regulation of RNA biosynthetic process	2	0.999937731	1.818	0.001	Biological Process	GO:2001141	regulation of RNA biosynthetic process	0.999937731	1	0	0	2	2453
GO:0140110 transcription regulator activity	1	0.999937963	0.935	0.001	Molecular Function	GO:0140110	transcription regulator activity	0.999937963	1	0	0	1	1841
GO:0051252 regulation of RNA metabolic process	2	0.99996153	1.818	0.001	Biological Process	GO:0051252	regulation of RNA metabolic process	0.99996153	1	0	0	2	2551
GO:0006351 transcription, DNA-templated	2	0.999973324	1.818	0.001	Biological Process	GO:0006351	transcription, DNA-templated	0.999973324	1	0	0	2	2625
GO:0097659 nucleic acid-templated transcription	2	0.999973456	1.818	0.001	Biological Process	GO:0097659	nucleic acid-templated transcription	0.999973456	1	0	0	2	2626
GO:0032774 RNA biosynthetic process	2	0.999976787	1.818	0.001	Biological Process	GO:0032774	RNA biosynthetic process	0.999976787	1	0	0	2	2653
GO:0019219 regulation of nucleobase-containing compound metabolic process	2	0.99997747	1.818	0.001	Biological Process	GO:0019219	regulation of nucleobase-containing compound metabolic process	0.99997747	1	0	0	2	2659
GO:0003674 molecular_function	107	1	100	0.005	Molecular Function	GO:0003674	molecular_function	1	1	0	0	107	21321
GO:0005575 cellular_component	115	1	100	0.005	Cellular Component	GO:0005575	cellular_component	1	1	0	0	115	20920
GO:0008150 biological_process	110	1	100	0.005	Biological Process	GO:0008150	biological_process	1	1	0	0	110	23190
