# Supplementary material for: MAG2 and MAL Regulate Vesicle Trafficking and Auxin Homeostasis With Functional Redundancy
Source: Front Plant Sci. 2022 Mar 16;13:849532. doi: 10.3389/fpls.2022.849532 (PMC8966843; doi:10.3389/fpls.2022.849532)
Supplement: Supplementary Table 4 — Auxin-related DAPs. [file Table_4.xlsx]

## Sheet: Sheet1
Gene ID	Gene name	Ratio	Regulation (mut/wt)	P-value	Function summary
AT1G76520.2	PILS3	only in WT	down	0.0162	auxin accumulation at the ER and nuclear auxin signaling, auxin transport
AT1G69960.1	PP2A	0.43	down	0.0011	oxidation of fatty acids and protoauxins
AT2G42500.1	PP2A-3	0.28	down	0.0497	polar auxin transport and establishing auxin gradients
AT2G47170.1	BEX1/ARF1A1C	only in mutant	up	0.0617	auxin-dependent developmental processes.
AT4G37590.1	MAB4/MEL1	only in WT	down	0.0615	auxin-mediated organogenesis and in root gravitropic responses.
AT3G26810.1	TIR1/AFB2	0.21	down	0.0043	Auxin receptor, mediates Aux/IAA ubiquitination and degradation
AT1G79200.1	SCI1	only in mutant	up	0.0207	auxin signaling pathway
AT1G02090.2	CSN7/COP15/FUS5	only in mutant	up	0.0331	cellular and developmental processes (e.g. auxin and JA responses)
AT3G53020.1	STV1/RPL24	0.35	down	0.0103	auxin-mediated gynoecium patterning.
AT1G30870.1	PRX7	only in WT	down	0.008	Auxin catabolism, lignin biosynthesis and degradation, H2O2 removal, etc.
AT4G08390.3	sAPX	0.4	down	0.0164	auxin accumulation at the ER and nuclear auxin signaling, auxin transport
AT5G05730.1	ASA1/JDL1/TRP5/WEI2/AMT1	3.55	up	0.0143	auxin production via tryptophan-dependent biosynthetic pathway.
AT4G27070.1	TSB2	only in mutant	up	0.0466	synthesis of L-tryptophan from indole and L-serine.
AT4G14430.1	IBR10/ECI2/ ECHIB/PEC12	only in mutant	up	0.0066	oxidation of unsaturated fatty acids/IAA formation.
AT2G24180.1	CYP71B6	2.06	up	0.0107	indole-containing compound metabolic process
AT3G62770.3	ATG18A/PEUP2	only in mutant	up	0.0336	cellular and developmental processes (e.g. auxin and JA responses)
AT1G51840.1	SIF1	0.25	down	0.0163	auxin accumulation at the ER and nuclear auxin signaling, auxin transport
AT2G38390.1	ATGH3.11/ FIN219/JAR1	2.01	up	0.0101	Auxin catabolism, lignin biosynthesis and degradation, H2O2 removal, etc.
AT4G08780.1	-	3.16	up	0.0195	Auxin catabolism, lignin biosynthesis and degradation, H2O2 removal, etc.
AT3G12050.1		0.45	down	0.0103	Auxin catabolism, lignin biosynthesis and degradation, H2O2 removal, etc.
