# Supplementary material for: MAG2 and MAL Regulate Vesicle Trafficking and Auxin Homeostasis With Functional Redundancy
Source: Front Plant Sci. 2022 Mar 16;13:849532. doi: 10.3389/fpls.2022.849532 (PMC8966843; doi:10.3389/fpls.2022.849532)
Supplement: Supplementary Table 5 — Primers and probes used in this study. [file Table_5.xlsx]

## Sheet: Sheet1
Supplementary Table 5 | Primers and probes used in this study
Primer (probe) name	Primer sequences (5'-3')	annotain
mag2-1 genotp-LP	GCTCGATTTGGGGATCCATG_x000B_	mag2-1 T-DNA line genotyping
mag2-1 genotp-RP	CTCCTCCTTTCCGCTATCTG	mag2-1 T-DNA line genotyping
mag2-1 genotp-pBI-TR-2	TTTGCTAGCTGATAGTGACCTTAG	mag2-1 T-DNA line genotyping
mal-1 genotp-LP	LP:ACCATCTGATCGACAAGATGG	mal-1 T-DNA line genotyping
mal-1 genotp-RP	RP:AGCCTCCTCTGTCTCCGTAAG	mal-1 T-DNA line genotyping
mal-1 genotp-GABI-Kat08474	ATAATAACGCTGCGGACATCTACATTTT	mal-1 T-DNA line genotyping
actin2-RT-PCR-F	AGAGATTCAGATGCCCAGAAGTCTTGTT	actin2 RT-PCR
actin2-RT-PCR-R	AGAGATTCAGATGCCCAGAAGTCTTGTT	actin2 RT-PCR
MAG2-RT-PCR-F	CTTCGGTATTTAGCTTTCTCGATGG	MAG2 RT-PCR
MAG2-RT-PCR-R	ATAAGCACGCACAGACTCAACTTGT	MAG2 RT-PCR
MAL-RT-PCR-F	TCCACTTCCACTGTCGTTCG	MAL RT-PCR
MAL-RT-PCR-R	CCAACTTTAAGGCAGTCACTGAAA	MAL RT-PCR
PIN4-RT-PCR-F	ATTCGGTTTAGTTGAAACACC	PIN4 RT-PCR
PIN4-RT-PCR-R	TCACTAAACTCCAAAACCCAC	PIN4 RT-PCR
PIN5-RT-PCR-F	TGTGGGAGAGAAGTCGTTCCTT	PIN5 RT-PCR
PIN5-RT-PCR-R	TGGCTACGCGGAGGACAT	PIN5 RT-PCR
PIN7-RT-PCR-F	AGTCCGTTAGGCACTTCCTTTACC	PIN7 RT-PCR
PIN7-RT-PCR-R	GGTGGTACTAATATGACTCCTC	PIN7 RT-PCR
AUX1-RT-PCR-F	TTGCCTCCATCATCCACG	AUX1 RT-PCR
AUX1-RT-PCR-R	CAAGAAGAGCACCGACAGC	AUX1 RT-PCR
IAA1-RT-PCR-F	ACACAAGCATTTTCAAGG	IAA1 RT-PCR
IAA1-RT-PCR-R	TCTGTTGAGTCGTTGTTC	IAA1 RT-PCR
IAA3-RT-PCR-F	GAACAGATAATGTATGTGAAGCA	IAA3 RT-PCR
IAA3-RT-PCR-R	GGACAACCTTTTGCCCTGTT	IAA3 RT-PCR
BiP3-RT-PCR-F	AGAGATTCAGATGCCCAGAAGTCTTGTT	IAA4 RT-PCR
BiP3-RT-PCR-R	GTAAACCGACTTAATAACCGGGTC	IAA5 RT-PCR
actin2-qPCR-F	AGAGATTCAGATGCCCAGAAGTCTTGTT	actin2 Quantitative real-time PCR
actin2-qPCR-R	AACGATTCCTGGACCTGCCTCATCATACTC	actin2 Quantitative real-time PCR
ABI3 qRT-F	CGCGGTGGCTCCACAACTTAAC	ABI3 Quantitative real-time PCR
ABI3 qRT-R	ACGATCCTTCCGAGGTTACCCAC	ABI3 Quantitative real-time PCR
ABI4 qRT-F	TTAGGGCAGGAACAAGGAGGAAGT	ABI4 Quantitative real-time PCR
ABI4 qRT-R	ACCAACGGCGGTGGATGAGTTATT	ABI4 Quantitative real-time PCR
MAL-pGADT7-F	CCATGGAGGCCAGTGAATTCATGCTTCCGATGGAACATCCAC	MAL Y2H pGADT7
MAL-pGADT7-R	CTCGAGCTGCAGATGAATCGTCTAGTAAGACCTACAAAATTGTTCCACAAGTTG	MAL Y2H pGADT7
MAL-pGBKT7-F	CCATGGAGGCCAGTGAATTCATGCTTCCGATGGAACATCCAC	MAL Y2H pGBKT7
MAL-pGBKT7-R	ATGCGGCCGCTGCAGGTCGACCTAGTAAGACCTACAAAATTGTTCCACAAGTTG	MAL Y2H pGBKT7
MAL northern F-probe	CCGCGCTTCGACTCTGA	MAL northern detection
MAL northern R-probe	TTGCTGTAACTCCCAATTCGTTT	MAL northern detection
